# Supplementary material for: An orthogonal and reactivity-based one-pot glycosylation strategy for both glycan and nucleoside synthesis: access to TMG-chitotriomycin, lipochitooligosaccharides and capuramycin
Source: Royal Society of Chemistry journal article supplement (doi:10.1039/d0sc06815b), 2021-01-01
Supplement: d0sc06815b1.pdf [file d0sc06815b1.pdf]

## Supporting information

### **An orthogonal and reactivity-based one-pot glycosylation strategy for both glycans and nucleosides synthesis: access to TMG-chitotriomycin, lipochitooligosaccharides and capuramycin**

Haiqing He,<sup>+</sup> Lili Xu,<sup>+</sup> Roujing Sun, Yunqin Zhang, Yingying Huang, Zixi Chen, Penghua Li, Rui Yang, and Guozhi Xiao\*

State Key Laboratory of Phytochemistry and Plant Resources in West China, Kunming Institute of Botany, University of Chinese Academy of Sciences, Chinese Academy of Sciences, Kunming 650201, China.

<sup>[+]</sup> These authors contributed equally to this work

E-mail: [xiaoguzhi@mail.kib.ac.cn](mailto:xiaoguzhi@mail.kib.ac.cn)

---

## Contents

|                                                                                                    |            |
|----------------------------------------------------------------------------------------------------|------------|
| <b>1. General Information .....</b>                                                                | <b>S3</b>  |
| <b>2. Experimental Procedures .....</b>                                                            | <b>S3</b>  |
| 2.1 Selective activation of other leaving groups over the PVB leaving group.....                   | S3         |
| 2.2 Selective activation of glycosyl PVB over other leaving groups .....                           | S9         |
| 2.3 One-Pot synthesis of oligosaccharides based on glycosyl PVB.....                               | S10        |
| 2.3.1 Preparation of new glycosyl donors and acceptors .....                                       | S10        |
| 2.3.2 One-pot glycosylation for the synthesis of oligosaccharides .....                            | S14        |
| 2.4 One-Pot synthesis of nucleosides based on glycosyl PVB.....                                    | S32        |
| 2.4.1 Preparation of new glycosyl donors and acceptors .....                                       | S32        |
| 2.4.2 One-pot glycosylation for the synthesis of nucleosides .....                                 | S36        |
| 2.5 Divergent and formal synthesis of TMG-chitotriomycin and lipochitooligosaccharides.....        | S47        |
| 2.5.1 Preparation of new glycosyl donors and acceptors .....                                       | S47        |
| 2.5.2 One-pot glycosylation for the synthesis of tetrasaccharide <b>76</b> .....                   | S52        |
| 2.5.3 Comparison of the analytical data of synthetic <b>76</b> with those reported <b>76</b> ..... | S52        |
| 2.6 Total synthesis of Capuramycin .....                                                           | S56        |
| 2.6.1 Aglycon transfer issues of thioglycosides .....                                              | S56        |
| 2.6.2 One-pot glycosylation for the total synthesis of compound <b>88</b> .....                    | S60        |
| 2.6.3 Comparison of the analytical data of Capuramycin and Synthetic <b>88</b> .....               | S67        |
| <b>3 References .....</b>                                                                          | <b>S68</b> |
| <b>4 NMR Spectra for the New Compounds.....</b>                                                    | <b>S70</b> |

## 1. General Information

Commercial reagents, starting materials, and solvents were purchased and used as received or distilled from the appropriate drying agent. Reactions requiring anhydrous conditions were performed under an atmosphere of nitrogen or argon with dry solvents unless otherwise stated. Crushed 3Å or 4Å molecular sieves were activated by flame-drying immediately under high vacuum prior to use. Reactions were monitored by thin layer chromatography (TLC) carried out on TLC Silica Gel 60 F254 (EMD Millipore Corporation) using UV light as visualizing tool and EtOH/H<sub>2</sub>SO<sub>4</sub> (8%, v/v) as the developing agent. Column chromatography was performed on Silica Gel 60 (200-300 mesh), and Sephadex LH-20 (GE Healthcare Bio-Sciences AB, Sweden).

<sup>1</sup>H, <sup>13</sup>C and COSY NMR spectra were recorded with Bruker AVANCE III 400 MHz or AVANCE III 600 MHz spectrometers. Chemical shifts (δ) for <sup>1</sup>H and <sup>13</sup>C NMR spectra are given in ppm relative to TMS, The residual solvent signals were used as references for <sup>1</sup>H and <sup>13</sup>C NMR spectra and the chemical shifts converted to the TMS scale. Data for <sup>1</sup>H are reported as follows: chemical shift (δ ppm), multiplicity (s = singlet, d = doublet, t = triplet, q = quartet, m = multiplet), coupling constant in Hz, and integration. Optical rotations were measured on an Autopol VI (Serial #91058). HRMS determinations were recorded on a mass spectrometer (SHIMADZU UPLC-IT-TOF or Agilent 1290) with ESI ionization.

## 2. Experimental Procedures

### 2.1 Selective activation of other leaving groups over the PVB leaving group

#### Synthesis of 2,3,4-tri-O-benzoyl-β-D-glucopyranosyl-2-(1-phenylvinyl)benzoate(2)

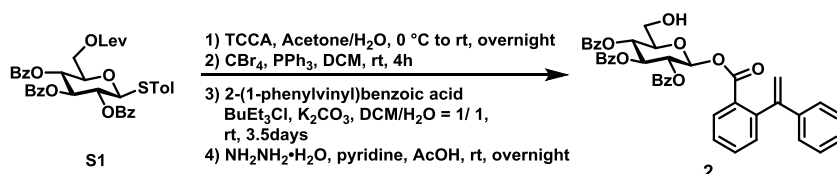

To a solution of compound **S1**<sup>[1]</sup> (2.47 g, 3.56 mmol) in acetone (72 mL) /H<sub>2</sub>O (18 mL) was added Trichloroisocyanuric acid (TCCA) (826 mg, 3.56 mmol) at 0 °C. The reaction mixture was

S3

---

warmed gradually to room temperature and stirred for overnight. Then EtOAc was added to this mixture and washed sequentially with saturated aqueous NaHCO<sub>3</sub>, H<sub>2</sub>O, and brine. The organic phase was dried by Na<sub>2</sub>SO<sub>4</sub> and concentrated *in vacuo*. Purification by flash chromatography (petroleum ether-EtOAc, 1.5:1) afforded the hemiacetal as a syrup (1.76 g, 84%). A solution of the above hemiacetal (1.67 g, 2.84 mmol), CBr<sub>4</sub> (4.7 g, 14.18 mmol), and PPh<sub>3</sub> (3.72 g, 14.18 mmol) in CH<sub>2</sub>Cl<sub>2</sub> (28 mL) was stirred at room temperature for 4 h. Then the mixture was diluted with CH<sub>2</sub>Cl<sub>2</sub> and washed sequentially with saturated aqueous NaHCO<sub>3</sub> and brine. The organic phase was dried by Na<sub>2</sub>SO<sub>4</sub> and concentrated *in vacuo*. The resulting residue was purified by flash chromatography (petroleum ether-EtOAc, 3:1) afforded glycosyl bromide as a white foam (1.01 g, 55%). And then, to a solution of the above intermediate (1.01 g, 1.544 mmol) and 2-(1-phenylvinyl) benzoic acid (0.451 g, 2.008 mmol) in CH<sub>2</sub>Cl<sub>2</sub> /H<sub>2</sub>O = 1/1 (15.4 mL) was added BnNEt<sub>3</sub>Cl (0.070 g, 0.309 mmol) and K<sub>2</sub>CO<sub>3</sub> (1.067 g, 7.721 mmol). The reaction mixture was stirred at room temperature for 3.5 days before diluted with brine and extracted with CH<sub>2</sub>Cl<sub>2</sub>. The organic phase was dried by Na<sub>2</sub>SO<sub>4</sub> and concentrated *in vacuo*. The resulting residue was purified by flash chromatography (petroleum ether-EtOAc, 2.5:1 to 1.8:1), followed by purification over a Sephadex<sup>TM</sup> LH-20 column (DCM/MeOH 1:1), affording glycosyl *ortho*-(1-phenylvinyl)benzoate (0.938 g, 76%) as a white foam. The above intermediate (0.8 g, 1.004 mmol) was then dissolved in pyridine (6 mL) and AcOH (4 mL), and hydrazine hydrate (146  $\mu$ L, 3.012 mmol) was added dropwise. After stirring at room temperature for overnight, the reaction mixture was quenched with acetone. The solution was concentrated *in vacuo* and diluted with CH<sub>2</sub>Cl<sub>2</sub>, washed sequentially with 1 N HCl and brine. The organic phase was dried by Na<sub>2</sub>SO<sub>4</sub> and concentrated *in vacuo*. The resulting residue was purified by flash chromatography (petroleum ether-EtOAc, 3.7:1), followed by purification over a Sephadex<sup>TM</sup> LH-20 column (DCM/MeOH 1:1) to afford **2** (0.498 g, 71%) as a white foam:  $[\alpha]_D^{22} = +16.51$  (*c* 0.15, CHCl<sub>3</sub>); <sup>1</sup>H NMR (400 MHz, Chloroform-*d*)  $\delta$  8.03 – 7.86 (m, 7H, Ar), 7.60 – 7.51 (m, 3H, Ar), 7.49 – 7.29 (m, 10H, Ar), 7.26 (s, 4H, Ar), 6.05 (d, *J* = 8.2 Hz, 1H, **H-1**), 5.99 (t, *J* = 9.6 Hz, 1H, H-3), 5.77 – 5.69 (m, 2H, H-2, H-PVB), 5.57 (t, *J* = 9.7 Hz, 1H, H-4), 5.18 (s, 1H, H-PVB), 3.90 (m, 1H, H-5), 3.80 (m, 1H, H-6), 3.68 (m, 1H, H-6), 2.36 (s, 1H, H-OH); <sup>13</sup>C NMR (101 MHz, CDCl<sub>3</sub>)  $\delta$  165.97, 165.74, 164.99, 164.70, 149.07, 143.94, 140.55, 133.80, 133.47, 133.38, 132.79, 131.70, 130.67, 130.01, 129.89,



129.81, 128.88, 128.81, 128.59, 128.57, 128.55, 128.46, 128.40, 128.20, 127.88, 127.54, 126.64, 114.41, 92.42, 75.46, 72.90, 70.78, 69.05, 61.05. HRMS (ESI) calcd for  $C_{42}H_{34}O_{10}Na$   $[M+Na]^+$  721.2044, found 721.2046.

**O-(2,3,4,6-tetra-O-benzoyl- $\beta$ -D-glucopyranosyl)-(1 $\rightarrow$ 6)-2,3,4-tri-O-benzoyl- $\beta$ -D-glucopyranosyl-2-(1-phenylvinyl) benzoate(3a)**

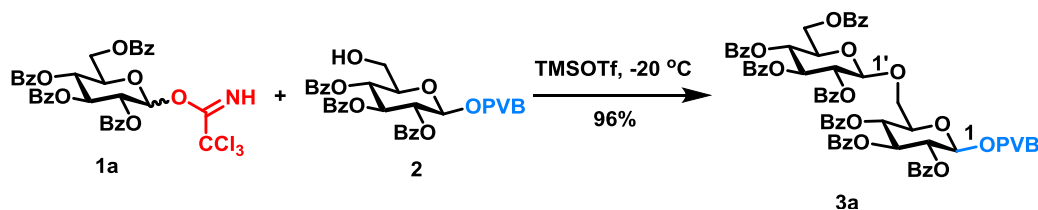

A mixture of donor **1a**<sup>[2]</sup> (51.0 mg, 0.069 mmol), acceptor **2** (40.0 mg, 0.057 mmol) and 4Å MS (100 mg) in dry  $CH_2Cl_2$  (0.8 mL) was stirred at room temperature for 15 min, then cooled to  $-20\text{ }^{\circ}C$ . TMSOTf (110  $\mu$ L, 10  $\mu$ L in 1 mL  $CH_2Cl_2$ , 0.006 mmol) was added to the mixture dropwise. The resulting mixture was stirred at  $-20\text{ }^{\circ}C$ . After being stirred for another 1h, the reaction was quenched with  $Et_3N$  (0.5 mL) and filtered. The filtrates were concentrated *in vacuo* to give a residue, which was purified by flash column chromatography (petroleum ether-EtOAc, 4:1 to 2:1) to afford **3a** (70.0 mg, 96%) as a syrup.  $[\alpha]_D^{21} = +13.16$  (*c* 0.10,  $CHCl_3$ );  $^1H$  NMR (400 MHz, Chloroform-*d*)  $\delta$  8.09 – 8.01 (m, 4H, Ar), 7.97 – 7.77 (m, 11H, Ar), 7.61 – 7.24 (m, 27H, Ar), 7.23 – 7.19 (m, 2H, Ar), 5.98 (d,  $J = 8.1$  Hz, 1H, **H-1**), 5.93 (t,  $J = 9.6$  Hz, 1H), 5.82 (t,  $J = 9.5$  Hz, 1H), 5.74 (s, 1H, H-PVB), 5.66 – 5.49 (m, 3H, H-2, H-2'), 5.42 (t,  $J = 9.7$  Hz, 1H), 5.13 (s, 1H, H-PVB), 5.03 (d,  $J = 7.8$  Hz, 1H, **H-1'**), 4.59 (d,  $J = 12.0$  Hz, 1H), 4.47 (dd,  $J = 12.2, 5.3$  Hz, 1H), 4.14 – 3.98 (m, 3H), 3.90 (dd,  $J = 12.0, 5.7$  Hz, 1H);  $^{13}C$  NMR (101 MHz,  $CDCl_3$ )  $\delta$  166.18, 165.83, 165.62, 165.31, 165.30, 165.17, 164.90, 164.59, 149.02, 144.04, 140.46, 133.53, 133.49, 133.42, 133.31, 133.27, 133.21, 133.17, 132.56, 131.53, 130.83, 130.08, 129.93, 129.92, 129.88, 129.84, 129.69, 129.42, 129.02, 128.95, 128.86, 128.79, 128.70, 128.51, 128.49, 128.44, 128.41, 128.38, 128.35, 128.26, 127.80, 127.60, 126.73, 114.46, 100.52, 92.47, 75.13, 73.09, 72.91, 72.23, 71.89, 70.85, 69.92, 69.25, 66.87, 63.17. HRMS (ESI) calcd for  $C_{76}H_{60}O_{19}Na$   $[M+Na]^+$  1299.3621, found 1299.3605.

**O-(2,3,4,6-tetra-O-benzoyl-β-D-glucopyranosyl)-(1→6)-2,3,4-tri-O-benzoyl-β-D-glucopyranosyl- 2-(1-phenylvinyl) benzoate(3a)**

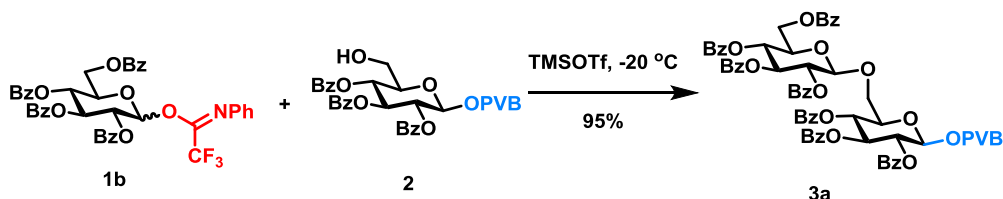

A mixture of donor **1b**<sup>[3]</sup> (53.0 mg, 0.069 mmol), acceptor **2** (40.0 mg, 0.057 mmol) and 4Å MS (100 mg) in dry CH<sub>2</sub>Cl<sub>2</sub> (0.8 mL) was stirred at room temperature for 15 min, then cooled to -20 °C. TMSOTf (110 μL, 10 μL in 1 mL CH<sub>2</sub>Cl<sub>2</sub>, 0.006 mmol) was added to the mixture dropwise. The resulting mixture was stirred at -20 °C. After being stirred for another 1 h, the reaction was quenched with Et<sub>3</sub>N (0.5 mL) and filtered. The filtrates were concentrated *in vacuo* to give a residue, which was purified by flash column chromatography (petroleum ether-EtOAc, 3:1 to 2:1) to afford **3a** (69 mg, 95%) as a syrup.  $[\alpha]_D^{21} = +13.16$  (*c* 0.10, CHCl<sub>3</sub>); <sup>1</sup>H NMR (400 MHz, Chloroform-*d*) δ 8.09 – 8.01 (m, 4H, Ar), 7.97 – 7.77 (m, 11H, Ar), 7.61 – 7.24 (m, 27H, Ar), 7.23 – 7.19 (m, 2H, Ar), 5.98 (d, *J* = 8.1 Hz, 1H, **H-1**), 5.93 (t, *J* = 9.6 Hz, 1H), 5.82 (t, *J* = 9.5 Hz, 1H), 5.74 (s, 1H, H-PVB), 5.66 – 5.49 (m, 3H, H-2, H-2'), 5.42 (t, *J* = 9.7 Hz, 1H), 5.13 (s, 1H, H-PVB), 5.03 (d, *J* = 7.8 Hz, 1H, **H-1'**), 4.59 (d, *J* = 12.0 Hz, 1H), 4.47 (dd, *J* = 12.2, 5.3 Hz, 1H), 4.14 – 3.98 (m, 3H), 3.90 (dd, *J* = 12.0, 5.7 Hz, 1H); <sup>13</sup>C NMR (101 MHz, CDCl<sub>3</sub>) δ 166.18, 165.83, 165.62, 165.31, 165.30, 165.17, 164.90, 164.59, 149.02, 144.04, 140.46, 133.53, 133.49, 133.42, 133.31, 133.27, 133.21, 133.17, 132.56, 131.53, 130.83, 130.08, 129.93, 129.92, 129.88, 129.84, 129.69, 129.42, 129.02, 128.95, 128.86, 128.79, 128.70, 128.51, 128.49, 128.44, 128.41, 128.38, 128.35, 128.26, 127.80, 127.60, 126.73, 114.46, 100.52, 92.47, 75.13, 73.09, 72.91, 72.23, 71.89, 70.85, 69.92, 69.25, 66.87, 63.17. HRMS (ESI) calcd for C<sub>76</sub>H<sub>60</sub>O<sub>19</sub>Na [M+Na]<sup>+</sup> 1299.3621, found 1299.3605.

**O-(2,3,4,6-tetra-O-benzoyl-β-D-glucopyranosyl)-(1→6)-2,3,4-tri-O-benzoyl-β-D-glucopyranosyl- 2-(1-phenylvinyl) benzoate(3a)**

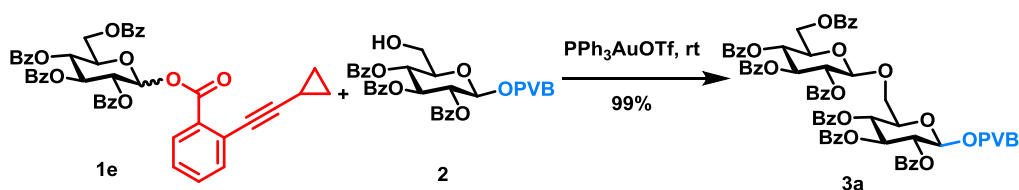

A mixture of donor **1e**<sup>[4]</sup> (131 mg, 0.172 mmol), acceptor **2** (100 mg, 0.143 mmol) and 3Å MS (252 mg) in dry CH<sub>2</sub>Cl<sub>2</sub> (1.4 mL) was stirred at room temperature for 15 min, to which a freshly prepared solution of PPh<sub>3</sub>AuOTf in CH<sub>2</sub>Cl<sub>2</sub> (0.36 mL, 0.079 M) was added to the mixture slowly. The resulting mixture was stirred at room temperature. After being stirred for another 2.5 h, the reaction was quenched with Et<sub>3</sub>N (1 mL) and filtered. The filtrates were concentrated in vacuo to give a residue, which was purified by flash column chromatography (petroleum ether-EtOAc, 2.5:1 to 2:1) to afford **3a** (181 mg, 99%) as a syrup.  $[\alpha]_D^{21} = +13.16$  (*c* 0.10, CHCl<sub>3</sub>); <sup>1</sup>H NMR (400 MHz, Chloroform-*d*)  $\delta$  8.09 – 8.01 (m, 4H, Ar), 7.97 – 7.77 (m, 11H, Ar), 7.61 – 7.24 (m, 27H, Ar), 7.23 – 7.19 (m, 2H, Ar), 5.98 (d, *J* = 8.1 Hz, 1H, **H-1**), 5.93 (t, *J* = 9.6 Hz, 1H), 5.82 (t, *J* = 9.5 Hz, 1H), 5.74 (s, 1H, H-PVB), 5.66 – 5.49 (m, 3H, H-2, H-2'), 5.42 (t, *J* = 9.7 Hz, 1H), 5.13 (s, 1H, H-PVB), 5.03 (d, *J* = 7.8 Hz, 1H, **H-1'**), 4.59 (d, *J* = 12.0 Hz, 1H), 4.47 (dd, *J* = 12.2, 5.3 Hz, 1H), 4.14 – 3.98 (m, 3H), 3.90 (dd, *J* = 12.0, 5.7 Hz, 1H); <sup>13</sup>C NMR (101 MHz, CDCl<sub>3</sub>)  $\delta$  166.18, 165.83, 165.62, 165.31, 165.30, 165.17, 164.90, 164.59, 149.02, 144.04, 140.46, 133.53, 133.49, 133.42, 133.31, 133.27, 133.21, 133.17, 132.56, 131.53, 130.83, 130.08, 129.93, 129.92, 129.88, 129.84, 129.69, 129.42, 129.02, 128.95, 128.86, 128.79, 128.70, 128.51, 128.49, 128.44, 128.41, 128.38, 128.35, 128.26, 127.80, 127.60, 126.73, 114.46, 100.52, 92.47, 75.13, 73.09, 72.91, 72.23, 71.89, 70.85, 69.92, 69.25, 66.87, 63.17. HRMS (ESI) calcd for C<sub>76</sub>H<sub>60</sub>O<sub>19</sub>Na [M+Na]<sup>+</sup> 1299.3621, found 1299.3605.

**O-(2,3,4,6-tetra-O-benzoyl-β-D-galactopyranosyl)-(1→6)-2,3,4-tri-O-benzoyl-β-D-glucopyranosyl- 2-(1-phenylvinyl) benzoate(3b)**

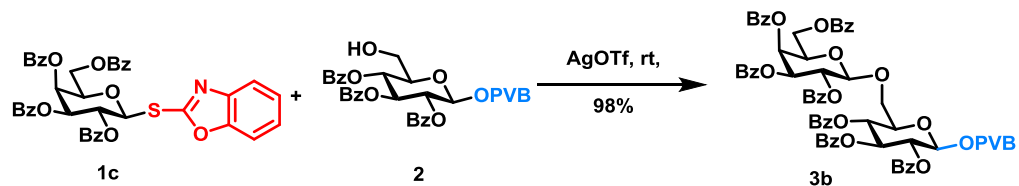

SBox donor **1c**<sup>[5]</sup> (40 mg, 0.055 mmol) and acceptor **2** (32 mg, 0.046 mmol) were dissolved in dry CH<sub>2</sub>Cl<sub>2</sub> (1mL). To this solution was added 4Å Molecular sieves (140mg). After stirring for 15 min

at room temperature, AgOTf (24 mg, 0.093 mmol) was added. The reaction mixture was stirred for another 2.5 h. The reaction mixture was then quenched with Et<sub>3</sub>N (0.5 mL), filtered and concentrated under vacuum. The residue was purified by column chromatography on silica gel (petroleum ether-EtOAc, 5:1 to 3:1), followed by purification over a Sephadex<sup>TM</sup> LH-20 column (DCM/MeOH 1:1) to afford **3b** (57.1mg, 98%) as a syrup.  $[\alpha]_D^{21} = +55.34$  (c 0.10, CHCl<sub>3</sub>); <sup>1</sup>H NMR (400 MHz, Chloroform-*d*)  $\delta$  8.15 – 8.01 (m, 6H, Ar), 7.96 – 7.77 (m, 9H, Ar), 7.65 – 7.24 (m, 27H, Ar), 7.22 (s, 2H, Ar), 6.05 – 5.92 (m, 2H, **H-1**), 5.88 – 5.78 (m, 2H, H-2'), 5.75 (s, 1H, H-PVB), 5.65 – 5.52 (m, 2H, H-2), 5.42 (t, *J* = 9.8 Hz, 1H), 5.12 (s, 1H, H-PVB), 5.05 (d, *J* = 7.9 Hz, 1H, **H-1'**), 4.66 – 4.55 (m, 1H), 4.42 – 4.33 (m, 1H), 4.23 – 4.16 (m, 1H), 4.14 – 4.02 (m, 2H), 3.97 (dd, *J* = 12.8, 6.0 Hz, 1H); <sup>13</sup>C NMR (101 MHz, CDCl<sub>3</sub>)  $\delta$  166.04, 165.66, 165.63, 165.62, 165.54, 165.28, 164.90, 164.64, 148.99, 143.98, 140.44, 133.60, 133.45, 133.37, 133.35, 133.31, 133.21, 132.61, 131.59, 130.79, 130.10, 130.02, 129.90, 129.83, 129.53, 129.50, 129.13, 128.95, 128.83, 128.69, 128.64, 128.61, 128.52, 128.46, 128.37, 128.27, 127.82, 127.65, 126.71, 114.42, 100.81, 92.52, 75.57, 72.92, 71.97, 71.36, 70.84, 69.80, 69.07, 68.22, 66.75, 62.09. HRMS (ESI) calcd for C<sub>76</sub>H<sub>60</sub>O<sub>19</sub>Na [M+Na]<sup>+</sup> 1299.3621, found 1299.3627.

**O-(2,3,4,6-tetra-O-benzoyl- $\beta$ -D-galactopyranosyl)-(1 $\rightarrow$ 6)-2,3,4-tri-O-benzoyl- $\beta$ -D-glucopyranosyl- 2-(1-phenylvinyl) benzoate(**3b**)**

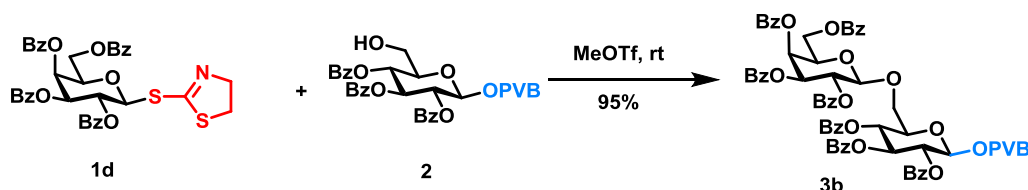

STaz donor **1d**<sup>[6]</sup> (52 mg, 0.075 mmol) and acceptor **2** (35 mg, 0.050 mmol) were dissolved in dry CH<sub>2</sub>Cl<sub>2</sub> (0.9 mL). To this solution was added 3 Å Molecular sieves (120mg). After stirring for 15 min at room temperature, MgOTf (19  $\mu$ L, 0.165mmol) was added slowly. The reaction mixture was stirred for another 2.5 h. The reaction mixture was then quenched with Et<sub>3</sub>N (0.5 mL), filtered and concentrated under vacuum. The residue was purified by column chromatography on silica gel (petroleum ether-EtOAc, 5:1 to 3:1), followed by purification over a Sephadex<sup>TM</sup> LH-20 column (DCM/MeOH 1:1) to afford **3b** (60.6mg, 95%) as a syrup.  $[\alpha]_D^{21} = +55.34$  (c 0.10, CHCl<sub>3</sub>); <sup>1</sup>H NMR (400 MHz, Chloroform-*d*)  $\delta$  8.15 – 8.01 (m, 6H, Ar), 7.96 – 7.77 (m, 9H, Ar), 7.65 – 7.24

(m, 27H, Ar), 7.22 (s, 2H, Ar), 6.05 – 5.92 (m, 2H, **H-1**), 5.88 – 5.78 (m, 2H, H-2'), 5.75 (s, 1H, H-PVB), 5.65 – 5.52 (m, 2H, H-2), 5.42 (t,  $J = 9.8$  Hz, 1H), 5.12 (s, 1H, H-PVB), 5.05 (d,  $J = 7.9$  Hz, 1H, **H-1'**), 4.66 – 4.55 (m, 1H), 4.42 – 4.33 (m, 1H), 4.23 – 4.16 (m, 1H), 4.14 – 4.02 (m, 2H), 3.97 (dd,  $J = 12.8, 6.0$  Hz, 1H);  $^{13}\text{C}$  NMR (101 MHz,  $\text{CDCl}_3$ )  $\delta$  166.04, 165.66, 165.63, 165.62, 165.54, 165.28, 164.90, 164.64, 148.99, 143.98, 140.44, 133.60, 133.45, 133.37, 133.35, 133.31, 133.21, 132.61, 131.59, 130.79, 130.10, 130.02, 129.90, 129.83, 129.53, 129.50, 129.13, 128.95, 128.83, 128.69, 128.64, 128.61, 128.52, 128.46, 128.37, 128.27, 127.82, 127.65, 126.71, 114.42, 100.81, 92.52, 75.57, 72.92, 71.97, 71.36, 70.84, 69.80, 69.07, 68.22, 66.75, 62.09. HRMS (ESI) calcd for  $\text{C}_{76}\text{H}_{60}\text{O}_{19}\text{Na}$   $[\text{M}+\text{Na}]^+$  1299.3621, found 1299.3627.

## 2.2 Selective activation of glycosyl PVB over other leaving groups

*p*-methylphenyl-O-(2,3,4,6-tetra-O-benzoyl- $\beta$ -D-glucopyranosyl)-(1 $\rightarrow$ 6)-2,3,4-tri-O-benzoyl-1-thio- $\beta$ -D-glucopyranoside (**6a**)

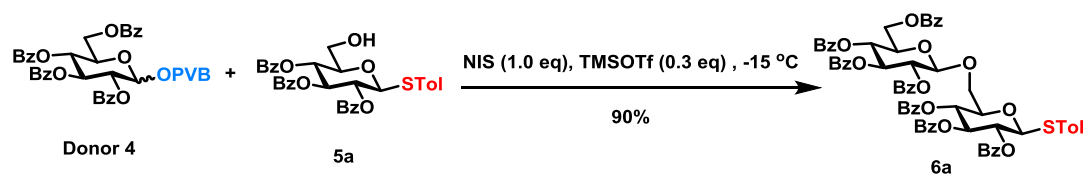

To a solution of donor **4**<sup>[7]</sup> (80.5 mg, 0.100 mmol) and thioglycoside acceptor **5a**<sup>[8]</sup> (50 mg, 0.084 mmol) in dry  $\text{CH}_2\text{Cl}_2$  (0.84 mL) was added 4Å Molecular sieves (200 mg). After stirring for 15 min at room temperature, the reaction mixture was cooled to  $-15^\circ\text{C}$ , and NIS (18.8 mg, 0.084 mmol), TMSOTf (4.5  $\mu\text{L}$ , 0.025 mmol) were added successively at  $-15^\circ\text{C}$ . The reaction mixture was stirred for another 2h, and then quenched with  $\text{Et}_3\text{N}$  (0.5 mL), filtered and concentrated under vacuum. The residue was purified by column chromatography on silica gel (petroleum ether-EtOAc, 4:1 to 3.5:1) to afford **6a**<sup>[9]</sup> (87.6 mg, 90%) as a syrup.  $^1\text{H}$  NMR (400 MHz,  $\text{CHloroform-}d$ )  $\delta$  8.10 (d,  $J = 7.8$  Hz, 2H, Ar), 8.03 – 7.93 (m, 6H, Ar), 7.88 (t,  $J = 6.9$  Hz, 4H, Ar), 7.79 (d,  $J = 7.8$  Hz, 2H, Ar), 7.62 – 7.19 (m, 25H, Ar), 5.92 (t,  $J = 9.6$  Hz, 1H, H-3'), 5.84 (t,  $J = 9.5$  Hz, 1H, H-3), 5.67 (t,  $J = 9.7$  Hz, 1H, H-4'), 5.57 (t,  $J = 8.8$  Hz, 1H, H-2'), 5.39 (t,  $J = 9.7$  Hz, 1H, H-2), 5.31 (t,  $J = 9.6$  Hz, 1H, H-4), 5.08 (d,  $J = 7.9$  Hz, 1H, **H-1'**), 4.87 (d,  $J = 10.0$  Hz, 1H,

**H-1**), 4.66 (dd,  $J = 12.4, 3.1$  Hz, 1H, H-6'), 4.47 (dd,  $J = 12.2, 5.2$  Hz, 1H, H-6'), 4.19 – 4.10 (m, 1H, H-5'), 4.10 – 3.95 (m, 3H, H-5, 2H-6), 2.40 (s, 3H, CH<sub>3</sub>-STol).

**Pent-4-en-yl-O-(2,3,4,6-tetra-O-benzoyl- $\beta$ -D-glucopyranosyl)-(1 $\rightarrow$ 6)-2,3,4-tri-O-benzoyl- $\beta$ -D-glucopyranoside (6b)**

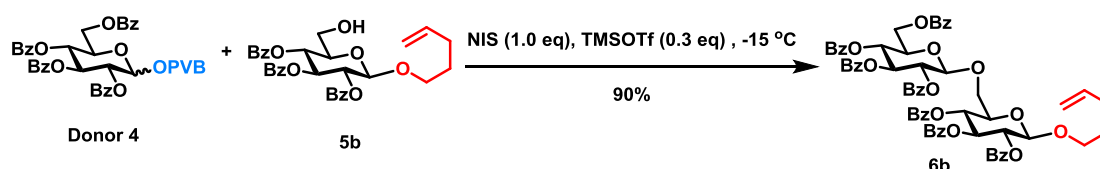

To a solution of donor **4**<sup>[7]</sup> (85.9 mg, 0.107 mmol) and acceptor **5b**<sup>[9]</sup> (50 mg, 0.089 mmol) in dry CH<sub>2</sub>Cl<sub>2</sub> (0.9 mL) was added 4Å Molecular sieves (200 mg). After stirring for 15 min at room temperature, the reaction mixture was cooled to -15 °C, and NIS (20.1 mg, 0.089 mmol), TMSOTf (4.8  $\mu$ L, 0.027 mmol) were added successively at -15 °C. The reaction mixture was stirred for another 2.5h, and then quenched with Et<sub>3</sub>N (0.5 mL), filtered and concentrated under vacuum. The residue was purified by column chromatography on silica gel (petroleum ether-EtOAc, 4:1 to 3.5:1) to afford **6b**<sup>[9]</sup> (90.5 mg, 90%) as a syrup. <sup>1</sup>H NMR (400 MHz, Chloroform-*d*)  $\delta$  8.04 (d,  $J = 7.7$  Hz, 2H, Ar), 7.99 (d,  $J = 7.8$  Hz, 2H, Ar), 7.97 – 7.87 (m, 6H, Ar), 7.87 – 7.79 (m, 4H, Ar), 7.60 – 7.48 (m, 6H, Ar), 7.48 – 7.33 (m, 10H, Ar), 7.32 – 7.25 (m, 5H, Ar), 5.93 (t,  $J = 9.6$  Hz, 1H, H-3'), 5.84 (t,  $J = 9.6$  Hz, 1H, H-3), 5.71 – 5.53 (m, 3H, H-2', H-4', CH-n-Pent), 5.43 (t,  $J = 8.9$  Hz, 1H, H-2), 5.34 (t,  $J = 9.7$  Hz, 1H, H-4), 5.04 (d,  $J = 7.8$  Hz, 1H, **H-1'**), 4.83 (d,  $J = 10.0$  Hz, 1H, CH<sub>2</sub>-n-Pent), 4.81 (d,  $J = 16.8$  Hz, 1H, CH<sub>2</sub>-n-Pent), 4.68 – 4.61 (m, 2H, **H-1**, H-6'), 4.46 (dd,  $J = 12.2, 5.1$  Hz, 1H, H-6'), 4.20 – 4.14 (m, 1H, H-5'), 4.11 (d,  $J = 11.2$  Hz, 1H, H-6), 4.04 (t,  $J = 9.0$  Hz, 1H, H-5), 3.91 (dd,  $J = 11.4, 7.9$  Hz, 1H, H-6), 3.70 – 3.61 (m, 1H, H-n-Pent), 3.29 – 3.17 (m, 1H, H-n-Pent), 1.96 – 1.84 (m, 2H, CH<sub>2</sub>-n-Pent), 1.53 – 1.32 (m, 2H, CH<sub>2</sub>-n-Pent).

## 2.3 One-Pot synthesis of oligosaccharides based on glycosyl PVB.

### 2.3.1 Preparation of new glycosyl donors and acceptors

#### 2-O-benzoyl-4,6-O-benzylidene- $\beta$ -D-galactopyranosyl-2-(1-phenylvinyl) benzoate (**8**)

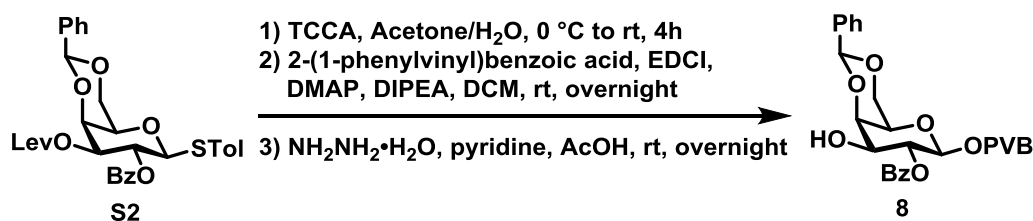

Compound **S2**<sup>[9]</sup> (328.7 mg, 0.570 mmol) was dissolved in acetone/H<sub>2</sub>O (14.3mL, v/v 4/1), and TCCA (132.5 mg, 0.570 mmol) was added slowly at 0 °C. Then the resulting mixture was allowed to warm to room temperature. After stirring at room temperature for 4h, the reaction mixture was diluted with ethyl acetate and washed with saturated aqueous NaHCO<sub>3</sub>, H<sub>2</sub>O, and brine. The organic layer was concentrated under vacuum, and the residue was purified by column chromatography on silica gel (petroleum ether- EtOAc, 2:1 to 1.2:1) to give the hemiacetal intermediate (224.6 mg, 83.7%). The above intermediate (224.6 mg, 0.477 mmol) and 2-(1-phenylvinyl) benzoic acid (117.7 mg, 0.525 mmol) were dissolved in dry DCM (4.8 mL), followed with the addition of EDCI (164.7 mg, 0.859 mmol), DMAP (58.3 mg, 0.477 mmol) and DIPEA (0.24 mL, 1.432 mmol). The resulting mixture was stirred for overnight at room temperature. Upon completion, the solvent was evaporated in vacuum. The residue was purified by column chromatography on silica gel (petroleum ether-EtOAc, 2.5:1 to 2:1) to afford the glycosyl *ortho*-(1-phenylvinyl)benzoate (265 mg, 81.8%, only β). The above intermediate (260.8 mg, 0.385 mmol) was then dissolved in pyridine/AcOH (3.8 mL, v/v 3/2), then NH<sub>2</sub>NH<sub>2</sub>·H<sub>2</sub>O (56 μL, 1.16 mmol) was added. After stirring at room temperature for overnight, the solvent was removed in vacuum, and the residue was purified by column chromatography on silica gel (petroleum ether-EtOAc, 2.5:1) to give **8** (199.8 mg, 90%) as a white foam.  $[\alpha]_D^{21} = +12.36$  (*c* 0.28, CHCl<sub>3</sub>); <sup>1</sup>H NMR (400 MHz, Chloroform-*d*) δ 8.04 – 7.96 (m, 3H, Ar), 7.65 – 7.36 (m, 13H, Ar), 7.32 – 7.21 (m, 3H, Ar), 5.90 (d, *J* = 8.4 Hz, 1H, **H-1**), 5.66 (s, 1H, ), 5.62 – 5.55 (m, 2H, H-2), 5.08 (s, 1H), 4.28 (d, *J* = 12.6 Hz, 1H, H-6), 4.23 (d, *J* = 3.7 Hz, 1H, H-4), 4.01 (d, *J* = 12.6 Hz, 1H, H-6), 3.94 (dd, *J* = 9.9, 3.6 Hz, 1H, H-3), 3.62 (s, 1H, H-5), 2.76 (s, 1H, H-OH). <sup>13</sup>C NMR (101 MHz, CDCl<sub>3</sub>) δ 166.03, 165.01, 148.96, 143.86, 140.28, 137.34, 133.32, 132.46, 131.37, 130.79, 129.89, 129.44, 129.38, 128.76, 128.39, 128.35, 128.20, 127.67, 127.48, 126.54, 126.45,

114.07, 101.38, 92.30, 75.35, 71.82, 71.63, 68.66, 67.33. HRMS (ESI) calcd for C<sub>35</sub>H<sub>30</sub>O<sub>8</sub>Na [M+Na]<sup>+</sup> 601.1833, found 601.1831.

**2-O-benzoyl-4-O-benzyl-6-O-(*tert*-butyldiphenylsilyl)-β-D-glucopyranosyl 2-(1-phenylvinyl) benzoate (**13**)**

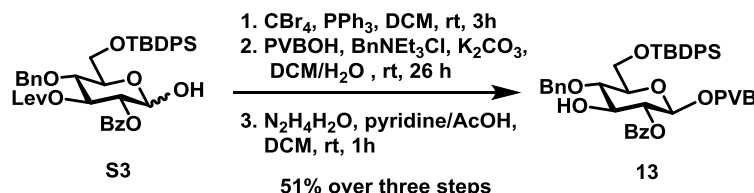

The hemiacetal **S3**<sup>[9]</sup> (600 mg, 0.844 mmol), CBr<sub>4</sub> (1.4 g, 4.22 mmol) and PPh<sub>3</sub> (1.105 g, 4.22 mmol) were dissolved in 8.5 mL CH<sub>2</sub>Cl<sub>2</sub>. The mixture was stirred at room temperature for 3 h, then diluted with CH<sub>2</sub>Cl<sub>2</sub>, washed with saturated aqueous NaHCO<sub>3</sub>. The organic phase was dried by Na<sub>2</sub>SO<sub>4</sub> and concentrated *in vacuo*. The resulting residue was purified by silica gel column chromatography (EtOAc/Petroleum ether =1/3, with 2% v/v Et<sub>3</sub>N) to afford glycosyl bromide (490 mg, 75%) as a light yellow foam. The above foam (127 mg, 0.164 mmol), 2-(1-phenylvinyl) benzoic acid (48 mg, 0.213 mmol) were dissolved in CH<sub>2</sub>Cl<sub>2</sub>/H<sub>2</sub>O = 0.85 mL/ 0.85 mL, then BnNEt<sub>3</sub>Cl (8 mg, 0.033 mmol) and K<sub>2</sub>CO<sub>3</sub> (113 mg, 2.235 mmol) were added at room temperature. The solution was stirred for 24 h, then diluted with CH<sub>2</sub>Cl<sub>2</sub>, washed with brine. The organic phase was dried by Na<sub>2</sub>SO<sub>4</sub> and concentrated *in vacuo*. The resulting residue was purified by silica gel column chromatography (EtOAc/Petroleum ether =1/4,) to afford glycosyl PVB (114 mg, 76%) as a white foam. To a solution of this foam (114 mg, 0.124 mmol) in 2.5 mL dry CH<sub>2</sub>Cl<sub>2</sub> was added 1 M hydrazine hydrate (0.25 mL, 0.248 mmol, hydrazine hydrate/pyridine/AcOH = 125 μL/1.4 mL/1 mL) at room temperature. The mixture was stirred at room temperature for 1 h. Then it was quenched with acetone and concentrated *in vacuo*. The resulting residue was purified by silica gel column chromatography (EtOAc/Petroleum ether =1/4) to afford **13** (91 mg, 90%) as a white foam; [α]<sub>D</sub><sup>22</sup> = -48.34 (c 0.14, CHCl<sub>3</sub>); <sup>1</sup>H NMR (400 MHz, Chloroform-*d*) δ 7.86 (t, *J* = 6.7 Hz, 3H), 7.60 (t, *J* = 7.3 Hz, 4H), 7.48 – 7.38 (m, 2H), 7.36 – 7.15 (m, 15H), 7.15 – 6.99 (m, 5H), 5.80 (d, *J* = 8.2 Hz, 1H, **H-1**), 5.45 (s, 1H, CH<sub>2</sub>-PVB), 5.12 (t, *J* = 8.3 Hz, 1H, H-2), 4.90 (s, 1H, CH<sub>2</sub>-PVB), 4.80 (d, *J* = 11.1 Hz, 1H, CH<sub>2</sub>-Bn), 4.70 (d, *J* = 11.1 Hz, 1H, CH<sub>2</sub>-Bn), 3.94 – 3.78 (m, 4H, H-3, H-4, H-5, and H-6a), 3.41 (d, *J* = 7.6 Hz, 1H, H-6b), , 2.64 (s, 1H, OH), 1.00 (s, 9H, CH<sub>3</sub>-TBDPS).



$^{13}\text{C}$  NMR (101 MHz,  $\text{CDCl}_3$ )  $\delta$  166.18, 164.97, 148.83, 143.81, 140.20, 138.15, 135.90, 135.65, 133.55, 133.45, 132.97, 132.34, 131.39, 130.63, 130.02, 129.74, 129.66, 129.27, 129.17, 128.63, 128.44, 128.16, 128.02, 127.99, 127.76, 127.67, 127.60, 127.53, 126.48, 114.11, 92.32, 77.62, 77.43, 77.11, 76.79, 76.40, 75.99, 75.18, 73.85, 62.24, 26.93, 19.46. HRMS (ESI) calcd for  $\text{C}_{51}\text{H}_{50}\text{O}_8\text{Na}$   $[\text{M}+\text{Na}]^+$  841.3167, found 841.3152.

**2-O-benzoyl-3,4-di-O-benzyl- $\alpha/\beta$ -D-glucopyranosyl 2-(1-phenylvinyl) benzoate (21)**

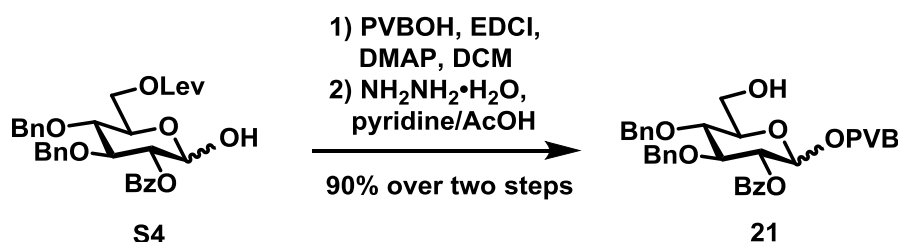

The hemiacetal **S4**<sup>[10]</sup> (1.15 g, 2.05 mmol), N-(3-dimethylaminopropyl)-N'-ethylcarbodiimide hydrochloride (EDCI) (709 mg, 3.69 mmol) and 4-dimethylaminopyridine (DMAP) (251 mg, 2.05) were dissolved in 10.3 mL  $\text{CH}_2\text{Cl}_2$ . Then acid 2-(1-phenylvinyl) benzoic acid<sup>[11]</sup> (506 mg, 2.26 mmol) and N,N-diisopropylethylamine (DIPEA) (1.02 mL, 6.16 mmol) were added successively at room temperature under Ar. The resulting mixture was stirred for 3.5 h at this temperature and concentrated *in vacuo* to produce the crude syrup. Then it was purified by silica gel column chromatography (EtOAc/Petroleum ether=1/3) to afford a white foam (1.52 g, 96%). This above foam (1.52 g, 1.97 mmol) was dissolved in pyridine (6 mL) and AcOH (4 mL), then hydrazine hydrate (0.19 mL, 3.94 mmol) was slowly added at room temperature under Ar. The mixture was stirred for 3 h and quenched with acetone, diluted with EtOAc, washed with 2 N HCl, saturated aqueous  $\text{NaHCO}_3$  and brine successively. The organic phase was dried by  $\text{Na}_2\text{SO}_4$  and concentrated *in vacuo*. The resulting residue was purified by silica gel column chromatography (EtOAc/Petroleum ether =1/2.5) to afford **21** as a white foam (1.32 g, 95%,  $\alpha/\beta = 1/3$ ). Data for the  $\beta$ -anomer:  $[\alpha]_{\text{D}}^{25} = +32.68$  (c 0.10,  $\text{CHCl}_3$ );  $^1\text{H}$  NMR (400 MHz,  $\text{CDCl}_3$ )  $\delta$  7.93 (d,  $J = 7.7$  Hz, 2H), 7.85 (d,  $J = 7.7$  Hz, 1H), 7.50 (t,  $J = 7.4$  Hz, 1H), 7.44 (t,  $J = 7.5$  Hz, 1H), 7.40 – 7.24 (m, 9H), 7.22 – 7.15 (m, 5H), 7.10 (s, 5H), 5.77 (d,  $J = 8.2$  Hz, 1H, **H-1**), 5.63 (s, 1H,  $\text{CH}_2\text{-PVB}$ ), 5.43 (t,  $J = 8.7$  Hz, 1H, H-2), 5.07 (s, 1H,  $\text{CH}_2\text{-PVB}$ ), 4.84 (d,  $J = 11.0$  Hz, 1H,  $\text{CH}_2\text{-Bn}$ ), 4.75 (d,  $J = 11.0$  Hz, 1H,  $\text{CH}_2\text{-Bn}$ ), 4.66 (d,  $J = 10.2$  Hz, 2H), 3.85 (t,  $J = 9.1$  Hz, 1H), 3.79 – 3.71 (m, 2H),

3.68 – 3.56 (m, 1H), 3.48 (d,  $J = 9.0$  Hz, 1H), 1.79 (d,  $J = 6.4$  Hz, 1H).  $^{13}\text{C}$  NMR (100 MHz,  $\text{CDCl}_3$ )  $\delta$  165.16, 164.88, 149.08, 143.86, 140.66, 137.82, 137.67, 133.42, 132.73, 131.71, 130.66, 129.91, 129.51, 128.75, 128.66, 128.55, 128.42, 128.20, 128.16, 127.90, 127.87, 127.47, 126.64, 114.39, 92.49, 82.51, 77.18, 76.21, 75.27, 75.21, 72.49, 61.34. HRMS (ESI) calcd for  $\text{C}_{42}\text{H}_{38}\text{O}_8\text{Na}$   $[\text{M}+\text{Na}]^+$  693.2459, found 693.2454.

### 2-*O*-benzoyl-4-*O*-benzyl- $\alpha/\beta$ -D-glucopyranosyl 2-(cyclopropylethynyl) benzoate (**23**)

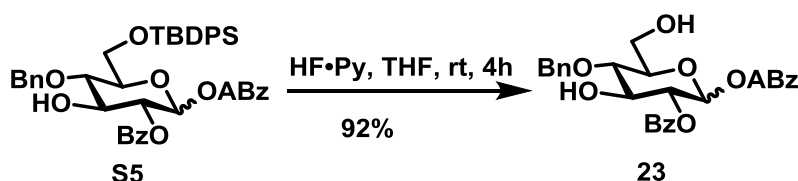

To a solution of compound **S5**<sup>[9]</sup> (384 mg, 0.49 mmol) in 3 mL THF was added 70% HF-pyridine (0.44 mL, 4.9 mmol) at room temperature. The mixture was stirred at this temperature for 4 h, then quenched with  $\text{Et}_3\text{N}$ , diluted with EtOAc, washed with saturated aqueous  $\text{NaHCO}_3$ . The organic phase was dried by  $\text{Na}_2\text{SO}_4$  and concentrated *in vacuo*. The resulting residue was purified by silica gel column chromatography (EtOAc/Petroleum ether = 1/2) to afford **23** (244 mg,  $\alpha/\beta = 1/2$ ) as a white foam. Data for the  $\beta$ -anomer:  $[\alpha]_{\text{D}}^{23} = +26.38$  (c 0.16,  $\text{CHCl}_3$ );  $^1\text{H}$  NMR (400 MHz, Chloroform-*d*)  $\delta$  7.98 (d,  $J = 7.7$  Hz, 2H), 7.88 (d,  $J = 7.9$  Hz, 1H), 7.50 (d,  $J = 7.4$  Hz, 1H), 7.44 – 7.27 (m, 8H), 7.27 – 7.17 (m, 2H), 6.07 (d,  $J = 8.1$  Hz, 1H, **H-1**), 5.34 (t,  $J = 8.8$  Hz, 1H, H-2), 4.88 (d,  $J = 11.3$  Hz, 1H,  $\text{CH}_2\text{-Bn}$ ), 4.77 (d,  $J = 11.3$  Hz, 1H,  $\text{CH}_2\text{-Bn}$ ), 4.07 (t,  $J = 9.0$  Hz, 1H, H-3), 4.02 – 3.94 (m, 1H, H-5), 3.84 – 3.60 (m, 3H, H-4 and H-6), 2.99 (s, 1H, OH), 2.08 (s, 1H, OH), 1.57 – 1.44 (m, 1H, CH-ABz), 0.96 – 0.74 (m, 4H,  $2\text{CH}_2\text{-ABz}$ ).  $^{13}\text{C}$  NMR (101 MHz,  $\text{CDCl}_3$ )  $\delta$  165.55, 163.01, 137.18, 133.72, 132.79, 131.73, 130.12, 129.19, 128.65, 128.38, 127.95, 127.76, 127.49, 127.45, 126.42, 124.94, 99.73, 91.70, 75.59, 75.02, 74.28, 73.64, 73.05, 60.80, 8.31, 8.28. HRMS (ESI) calcd for  $\text{C}_{32}\text{H}_{30}\text{O}_8\text{Na}$   $[\text{M}+\text{Na}]^+$  565.1833, found 565.1833.

### 2.3.2 One-pot glycosylation for the synthesis of oligosaccharides

#### *p*-Methylphenyl

(2,3,4,6-*tetra-O*-benzoyl- $\beta$ -D-glucopyranosyl)-(1 $\rightarrow$ 6)-(2,3,4-tri-*O*-benzoyl- $\beta$ -D-glucopyranosyl)-(1 $\rightarrow$ 6)-2,3,4-tri-*O*-benzoyl-1-thio- $\beta$ -D-glucopyranoside (**25**)

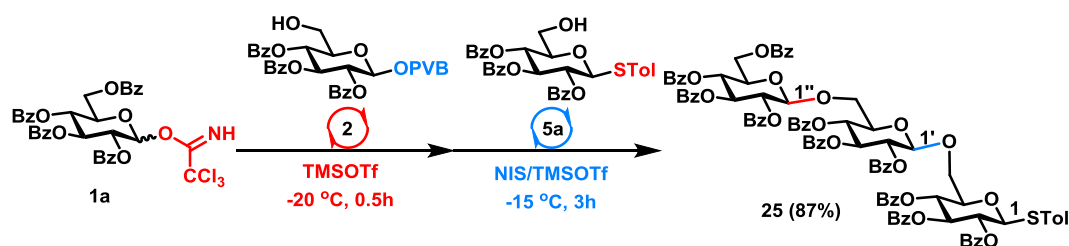

A suspension of glucosyl trichloroacetimidate **1a**<sup>[2]</sup> (56.5 mg, 0.076 mmol), glucosyl PVB acceptor **2** (44.4 mg, 0.064 mmol), and activated 3 Å MS (300 mg) in dry CH<sub>2</sub>Cl<sub>2</sub> (1.2 mL) was stirred at room temperature for 15 min and was then cooled to -20 °C. TMSOTf (120 µL, 10 µL in 1 mL CH<sub>2</sub>Cl<sub>2</sub>, 0.006 mmol) was added to the mixture dropwise. After being stirred at -20 °C for another 0.5 h, the reaction mixture was warmed up to -15 °C, to which glucosyl acceptor **5a**<sup>[8]</sup> (34.2 mg, 0.057 mmol) and NIS (14.3 mg, 0.064 mmol) and TMSOTf (2.4 µL, 0.013 mmol) were added successively. The resulting mixture was stirred at -15 °C for another 3h, then was quenched with Et<sub>3</sub>N (0.7mL) and filtered. The filtrates were concentrated under vacuum to give a residue, which was purified by flash column chromatography (petroleum ether-EtOAc, 2.5:1 to 2:1), followed by purification over a Sephadex<sup>TM</sup> LH-20 column (DCM/MeOH 1:1) to afford **25** (82.2 mg, 87%) as a syrup.  $[\alpha]_D^{29} = -3.86$  (*c* 0.16, CHCl<sub>3</sub>); <sup>1</sup>H NMR (400 MHz, Chloroform-*d*) δ 8.05 (t, *J* = 6.6 Hz, 4H, Ar), 8.00 (d, *J* = 7.7 Hz, 2H, Ar), 7.98 – 7.87 (m, 10H, Ar), 7.81 (t, *J* = 7.2 Hz, 4H, Ar), 7.60 – 7.26 (m, 30H, Ar), 7.25 – 7.14 (m, 4H, Ar), 6.17 (t, *J* = 9.7 Hz, 1H, H-3''), 5.88 (t, *J* = 9.5 Hz, 1H, H-3), 5.72 (t, *J* = 9.5 Hz, 2H, H-3', H-4''), 5.63 – 5.49 (m, 3H, H-2, H-4, H-2''), 5.29 – 5.17 (m, 2H, **H-1''**, H-2'), 5.12 (t, *J* = 9.6 Hz, 1H, H-4'), 4.99 (d, *J* = 9.9 Hz, 1H, **H-1**), 4.71 – 4.60 (m, 2H, **H-1'**, H-6''), 4.49 (dd, *J* = 12.2, 5.4 Hz, 1H, H-6''), 4.45 – 4.37 (m, 1H, H-5''), 4.10 – 4.00 (m, 2H), 3.99 – 3.82 (m, 3H, H-5, H-5'), 3.66 (dd, *J* = 11.2, 5.1 Hz, 1H), 2.36 (s, 3H, CH<sub>3</sub>-STol); <sup>13</sup>C NMR (151 MHz, CDCl<sub>3</sub>) δ 166.19, 165.88, 165.86, 165.66, 165.37, 165.33, 165.05, 165.03, 138.69, 133.58, 133.56, 133.42, 133.35, 133.27, 133.24, 133.19, 133.15, 130.06, 130.01, 129.99, 129.93, 129.91, 129.84, 129.77, 129.70, 129.52, 129.46, 129.38, 129.17, 129.02, 128.96, 128.91, 128.78, 128.68, 128.57, 128.51, 128.47, 128.42, 128.39, 128.37, 128.34, 128.30, 128.26, 101.53, 100.59, 86.68, 77.51, 74.32, 74.13, 72.85, 72.75, 72.33, 72.19, 71.81, 70.71, 70.32, 69.83, 69.72, 68.51, 63.28, 21.31. HRMS (ESI) calcd for C<sub>95</sub>H<sub>78</sub>O<sub>25</sub>SNa [M+Na]<sup>+</sup> 1673.4445, found 1673.4436.

*p*-Methylphenyl

(2,3-di-*O*-benzoyl-4,6-(di-*tert*-butylsilylidene)- $\alpha$ -D-galacopyranosyl)-(1 $\rightarrow$ 3)-(2-*O*-benzoyl-4,6-benzylidene- $\beta$ -D-galacopyranosyl)-(1 $\rightarrow$ 4)-2-*N*-phthalimido-3,6-di-*O*-benzyl-2-deoxy-1-thio- $\beta$ -D-glucopyranoside (**26**)

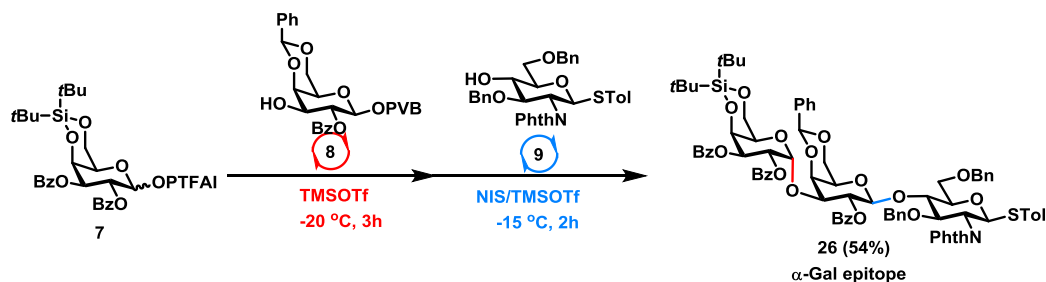

A suspension of glucosyl trifluoroacetimidate **7**<sup>[11]</sup> (50.3 mg, 0.072 mmol), glucosyl PVB acceptor **8** (32.0 mg, 0.055 mmol), and activated 3 Å MS (280 mg) in dry CH<sub>2</sub>Cl<sub>2</sub> (1.0 mL) was stirred at room temperature for 15 min and was then cooled to -20 °C. TMSOTf (200 µL, 10 µL in 1 mL CH<sub>2</sub>Cl<sub>2</sub>, 0.011 mmol) was added to the mixture dropwise. After being stirred at -20 °C for another 3h, the reaction mixture was warmed up to -15 °C, to which glucosyl acceptor **9**<sup>[12]</sup> (29.7 mg, 0.050 mmol) and NIS (12.4 mg, 0.055 mmol) and TMSOTf (100 µL, 10 µL in 1 mL CH<sub>2</sub>Cl<sub>2</sub>, 0.006 mmol) were added successively. The resulting mixture was stirred at -15 °C for another 2 h, then was quenched with Et<sub>3</sub>N (0.6mL) and filtered. The filtrates were concentrated under vacuum to give a residue, which was purified by flash column chromatography (petroleum ether-EtOAc, 2.6:1), followed by purification over a Sephadex<sup>TM</sup> LH-20 column (DCM/MeOH 1:1) to afford **26** (39.5 mg, 54%) as a syrup.  $[\alpha]_D^{29} = +193.12$  (c 0.13, CHCl<sub>3</sub>); <sup>1</sup>H NMR (400 MHz, Chloroform-*d*)  $\delta$  8.07 (d, *J* = 7.7 Hz, 2H, Ar), 7.96 (d, *J* = 7.8 Hz, 2H, Ar), 7.89 – 7.78 (m, 3H, Ar), 7.73 – 7.47 (m, 8H, Ar), 7.46 – 7.33 (m, 8H, Ar), 7.24 (d, *J* = 7.8 Hz, 2H, Ar), 7.14 – 7.07 (m, 4H, Ar), 7.04 – 6.88 (m, 6H, Ar), 6.80 – 6.66 (m, 3H, Ar), 5.69 (t, *J* = 8.8 Hz, 1H, H-2'), 5.61 (d, *J* = 3.8 Hz, 1H, **H-1''**), 5.54 (dd, *J* = 10.5, 3.4 Hz, 1H, H-2''), 5.41 dd, *J* = 10.4, 2.4 Hz, 1H, H-3''), 5.35 (d, *J* = 10.2 Hz, 1H, **H-1**), 5.06 (s, 1H, H-CHPh), 4.94 (d, *J* = 12.6 Hz, 1H, H-Bn), 4.81 (d, *J* = 7.9 Hz, 1H, **H-1'**), 4.72 (d, *J* = 12.0 Hz, 1H, H-Bn), 4.59 – 4.50 (m, 2H, H-4'', H-Bn), 4.42 (d, *J* = 12.0 Hz, 1H, H-Bn), 4.30 – 4.16 (m, 3H, H-2), 4.15 – 4.06 (m, 2H), 3.91 – 3.74 (m, 4H, H-3'), 3.69 – 3.57 (m, 3H), 3.41 (d, *J* = 9.8 Hz, 1H), 3.23 (s, 1H), 2.25 (s, 3H, CH<sub>3</sub>-STol), 1.06 (s, 9H, 9H-*t*Bu), 0.87 (s, 9H, 9H-*t*Bu); <sup>13</sup>C NMR (151 MHz, CDCl<sub>3</sub>)  $\delta$  167.89, 167.46, 166.81, 165.86, 164.76, 138.67, 516

138.54, 138.14, 137.56, 133.83, 133.71, 133.60, 133.54, 133.35, 133.07, 131.85, 131.74, 130.04, 129.83, 129.73, 129.71, 129.58, 129.00, 128.86, 128.58, 128.45, 128.39, 128.33, 128.06, 127.93, 127.85, 127.74, 126.82, 126.12, 123.45, 123.37, 100.71, 100.56, 95.78, 83.55, 79.08, 78.20, 77.79, 75.30, 73.62, 72.84, 70.97, 70.84, 70.75, 69.29, 68.60, 68.00, 67.35, 66.64, 66.34, 55.01, 27.49, 27.28, 23.25, 21.20, 20.77. HRMS (ESI) calcd for C<sub>83</sub>H<sub>85</sub>NO<sub>19</sub>SSiNa [M+Na]<sup>+</sup> 1482.5098, found 1482.5106.

## Methyl

(2,3-di-*O*-benzoyl-4,6-(di-*tert*-butylsilylidene)- $\alpha$ -D-galacopyranosyl)-(1 $\rightarrow$ 3)-(2-*O*-benzoyl-4,6-benzylidene- $\beta$ -D-galacopyranosyl)-(1 $\rightarrow$ 4)-2,3,6-tri-*O*-benzyl- $\beta$ -D-glucopyranoside (**27**)

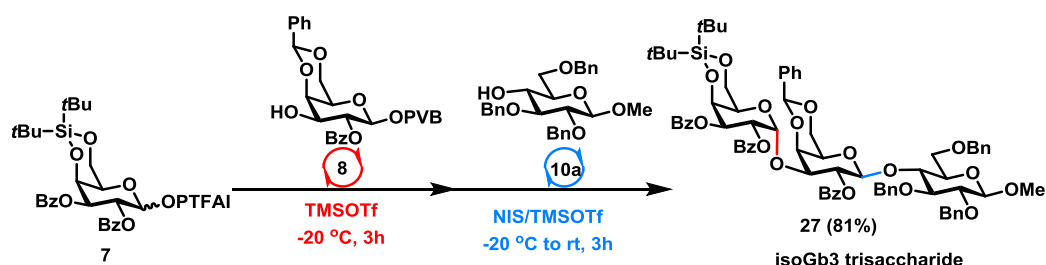

A suspension of glucosyl trifluoroacetimidate **7**<sup>[11]</sup> (57.6 mg, 0.082 mmol), glucosyl PVB acceptor **8** (36.6 mg, 0.063 mmol), and activated 3 Å MS (340 mg) in dry CH<sub>2</sub>Cl<sub>2</sub> (1.2 mL) was stirred at room temperature for 15 min and was then cooled to -20 °C. TMSOTf (2.7 μL, 0.015 mmol) was added to the mixture dropwise. After being stirred at -20 °C for another 3 h, to which glucosyl acceptor **10a**<sup>[13]</sup> (26.0 mg, 0.057 mmol), NIS (17.1 mg, 0.076 mmol) and TMSOTf (150 μL, 10 μL in 1 mL CH<sub>2</sub>Cl<sub>2</sub>, 0.008 mmol) were added successively. The resulting mixture was warmed gradually to room temperature and stirred for 3 h, then was quenched with Et<sub>3</sub>N (0.5 mL) and filtered. The filtrates were concentrated under vacuum to give a residue, which was purified by flash column chromatography (petroleum ether-EtOAc, 4:1 to 2:1), followed by purification over a Sephadex<sup>TM</sup> LH-20 column (DCM/MeOH 1:1) to afford **27**<sup>[9]</sup> (61.1 mg, 81%) as a syrup. <sup>1</sup>H NMR (400 MHz, Chloroform-*d*) δ 8.05 (d, *J* = 7.7 Hz, 2H, Ar), 7.98 (d, *J* = 7.7 Hz, 2H, Ar), 7.85 (d, *J* = 7.7 Hz, 2H, Ar), 7.64 (t, *J* = 7.3 Hz, 1H, Ar), 7.55 – 7.47 (m, 3H, Ar), 7.42 – 7.23 (m, 17H, Ar), 7.21 – 7.10 (m, 6H, Ar), 7.06 (t, *J* = 7.6 Hz, 2H, Ar), 5.64 (t, *J* = 9.2 Hz, 1H, H-2'), 5.61 – 5.52 (m, 2H, **H-1''**, H-2''), 5.43 (dd, *J* = 10.3, 2.9 Hz, 1H, H-3''), 5.10 – 5.01 (m, 2H, H-CHPh, H-Bn), 4.85 (t, *J* = 10.8 Hz, 2H, H-Bn, H-Bn), 4.80 (d, *J* = 7.9 Hz, 1H, **H-1'**), 4.70 (d, *J* = 11.1 Hz,

1H, H-Bn), 4.61 (d,  $J = 12.2$  Hz, 1H, H-Bn), 4.55 (d,  $J = 3.0$  Hz, 1H, H-4''), 4.29 (d,  $J = 12.2$  Hz, 1H, H-Bn), 4.23 (d,  $J = 7.7$  Hz, 1H, **H-1**), 4.09 (d,  $J = 12.2$  Hz, 1H), 4.02 (d,  $J = 1.7$  Hz, 1H, H-4'), 3.94 (t,  $J = 9.2$  Hz, 1H, H-4), 3.83 – 3.69 (m, 3H, H-3'), 3.67 – 3.54 (m, 5H, H-3), 3.51 (s, 3H, 3H-OCH<sub>3</sub>), 3.41 (t,  $J = 8.4$  Hz, 1H, H-2), 3.30 – 3.23 (m, 1H), 2.99 (s, 1H), 1.06 (s, 9H, 9H-tBu), 0.87 (s, 9H, 9H-tBu).

### *p*-Methoxyphenyl

(2,3,4,6-tetra-*O*-benzoyl- $\beta$ -D-galacopyranosyl)-(1 $\rightarrow$ 6)-(2,3,4-tri-*O*-benzoyl- $\beta$ -D-glucopyranosyl)-(1 $\rightarrow$ 6)-2,3,4-tri-*O*-benzoyl- $\beta$ -D-glucopyranoside (**28**)

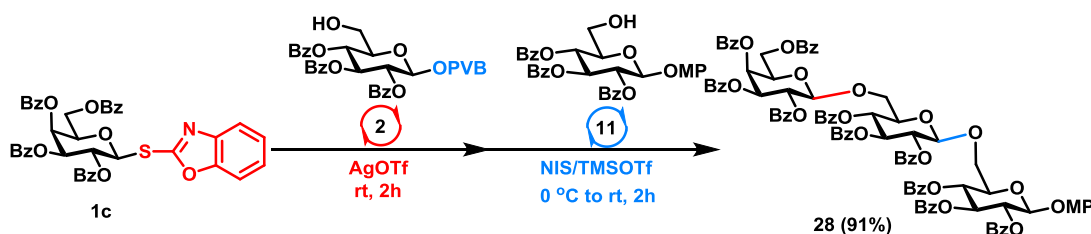

A suspension of SBox donor **1c**<sup>[5]</sup> (58.2 mg, 0.080 mmol), glucosyl PVB acceptor **2** (42.9 mg, 0.061 mmol), and activated 3Å MS (240 mg) in dry CH<sub>2</sub>Cl<sub>2</sub> (1 mL) was stirred at room temperature for 15 min, to which AgOTf (31.5 mg, 0.123 mmol) was added to the mixture. After being stirred at room temperature for another 2h, the reaction mixture was cooled to 0 °C, to which glucosyl acceptor **11**<sup>[14]</sup> (30.9 mg, 0.052 mmol), NIS (17.4 mg, 0.077 mmol) and TMSOTf (2.8  $\mu$ L, 0.015 mmol) were added successively at 0 °C. The resulting mixture was warmed gradually to room temperature and stirred for 2 h, then was quenched with Et<sub>3</sub>N (0.5mL) and filtered. The filtrates were concentrated under vacuum to give a residue, which was purified by flash column chromatography (petroleum ether-EtOAc, 2.5:1) to afford **28** (92.2 mg, 91%) as a syrup.  $[\alpha]_D^{29} = +25.72$  ( $c$  0.15, CHCl<sub>3</sub>); <sup>1</sup>H NMR (400 MHz, Chloroform-*d*)  $\delta$  8.14 (d,  $J = 7.7$  Hz, 2H, Ar), 8.06 (t,  $J = 6.8$  Hz, 4H, Ar), 8.03 - 7.98 (m, 4H, Ar), 7.95 – 7.85 (m, 8H, Ar), 7.79 (d,  $J = 7.7$  Hz, 2H, Ar), 7.64 – 7.25 (m, 30H, Ar), 7.01 (d,  $J = 8.5$  Hz, 2H, Ar), 6.86 (d,  $J = 8.7$  Hz, 2H, Ar), 6.08 (d,  $J = 3.3$  Hz, 1H, H-4''), 5.99 – 5.90 (m, 2H, H-3, H-3''), 5.89 – 5.80 (m, 2H, H-2, H-2''), 5.72 (t,  $J = 9.6$  Hz, 1H, H-3'), 5.64 (t,  $J = 9.5$  Hz, 1H, H-4), 5.29 – 5.08 (m, 4H, **H-1**, H-2', H-4', **H-1''**), 4.71 (d,  $J = 7.8$  Hz, 1H, **H-1'**), 4.64 (dd,  $J = 10.6, 6.0$  Hz, 1H), 4.55 – 4.42 (m, 2H), 4.13 – 3.96 (m, 3H, H-5), 3.95 – 3.85 (m, 2H, H-5'), 3.77 (s, 3H, CH<sub>3</sub>-OMP), 3.69 (dd,  $J = 11.1, 5.0$  Hz, 1H). <sup>13</sup>C

NMR (101 MHz, CDCl<sub>3</sub>)  $\delta$  166.07, 165.84, 165.67, 165.64, 165.60, 165.52, 165.36, 165.09, 165.06, 155.94, 151.08, 133.61, 133.58, 133.35, 133.29, 133.23, 130.12, 130.09, 129.95, 129.90, 129.88, 129.85, 129.73, 129.56, 129.41, 129.39, 129.36, 129.15, 129.11, 128.97, 128.95, 128.89, 128.72, 128.69, 128.62, 128.58, 128.50, 128.46, 128.43, 128.36, 119.08, 114.79, 101.74, 100.97, 100.27, 77.36, 74.36, 74.02, 72.77, 71.94, 71.83, 71.48, 70.47, 70.27, 69.51, 68.62, 68.12, 62.26, 55.72. HRMS (ESI) calcd for C<sub>95</sub>H<sub>78</sub>O<sub>27</sub>Na [M+Na]<sup>+</sup> 1673.4623, found 1673.4622.

## Methyl

(2,3,4,6-tetra-*O*-benzoyl- $\beta$ -D-galactopyranosyl)-(1 $\rightarrow$ 6)-(2,3,4-tri-*O*-benzoyl- $\beta$ -D-glucopyranosyl)-(1 $\rightarrow$ 4)-2,3,4-tri-*O*-benzyl- $\alpha$ -D-glucopyranoside (**29**)

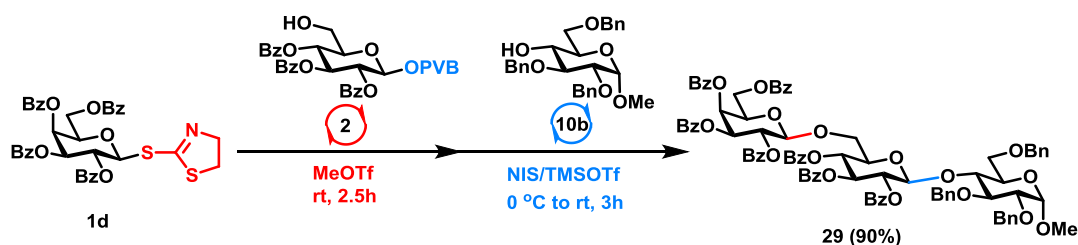

A suspension of STaz galactoside donor **1d**<sup>[6]</sup> (64.4 mg, 0.092 mmol), glucosyl PVB acceptor **2** (43.5 mg, 0.062 mmol), and activated 3 Å MS (280 mg) in dry CH<sub>2</sub>Cl<sub>2</sub> (1 mL) was stirred at room temperature for 15 min, to which MeOTf (24  $\mu$ L, 0.206 mmol) was added to the mixture slowly. After being stirred at room temperature for 2.5 h, the reaction mixture was cooled to 0 °C, to which glucosyl acceptor **10b**<sup>[13]</sup> (24.3 mg, 0.052 mmol), NIS (17.6 mg, 0.078 mmol) and TMSOTf (2.8  $\mu$ L, 0.016 mmol) were added successively at 0 °C. The resulting mixture was warmed gradually to room temperature and stirred for 3 h, then was quenched with Et<sub>3</sub>N (0.5 mL) and filtered. The filtrates were concentrated under vacuum to give a residue, which was purified by flash column chromatography (petroleum ether-EtOAc, 4:1 to 3.5:1), followed by purification over a Sephadex<sup>TM</sup> LH-20 column (DCM/MeOH 1:1) to afford **29** (71.4 mg, 90%) as a syrup.  $[\alpha]_D^{29} = +34.65$  (*c* 0.13, CHCl<sub>3</sub>); <sup>1</sup>H NMR (400 MHz, Chloroform-*d*)  $\delta$  8.13 – 8.01 (m, 6H, Ar), 7.96 (d, *J* = 7.8 Hz, 2H, Ar), 7.92 – 7.81 (m, 4H, Ar), 7.74 (d, *J* = 7.8 Hz, 2H, Ar), 7.67 (d, *J* = 7.6 Hz, 2H, Ar), 7.61 – 7.18 (m, 34H, Ar), 5.87 – 5.75 (m, 2H, H-2'', H-4''), 5.71 – 5.58 (m, 2H, H-3'', H-3'), 5.46 (t, *J* = 9.1 Hz, 1H, H-2'), 5.37 (t, *J* = 9.8 Hz, 1H, H-4'), 5.30 – 5.16 (m, 2H, H-1'', H-Bn), 5.07 (d, *J* = 11.9 Hz, 1H, H-Bn), 4.96 (d, *J* = 11.9 Hz, 1H, H-Bn), 4.88 – 4.76 (m,

2H, **H-1'**, H-Bn), 4.62 (s, 1H, **H-1**), 4.37 – 4.23 (m, 2H, H-Bn), 4.20 – 3.92 (m, 6H, H-Bn), 3.86 – 3.72 (m, 2H, H-2, H-5'), 3.60 (d,  $J = 9.1$  Hz, 2H), 3.41 (t,  $J = 12.4$  Hz, 2H), 3.33 (s, 3H, 3H-OCH<sub>3</sub>). <sup>13</sup>C NMR (101 MHz, CDCl<sub>3</sub>)  $\delta$  165.86, 165.84, 165.70, 165.55, 165.42, 165.37, 164.76, 139.74, 138.77, 137.84, 133.59, 133.45, 133.33, 133.24, 133.18, 133.09, 130.03, 129.98, 129.84, 129.78, 129.74, 129.67, 129.30, 129.18, 129.16, 128.96, 128.90, 128.85, 128.81, 128.71, 128.59, 128.53, 128.48, 128.42, 128.38, 128.35, 128.31, 128.25, 128.16, 127.94, 127.75, 100.68, 100.01, 98.39, 81.32, 80.16, 77.36, 77.01, 76.46, 74.79, 73.77, 73.33, 73.07, 72.23, 71.72, 70.46, 70.41, 69.97, 69.70, 68.36, 67.85, 66.73, 61.67, 55.40. HRMS (ESI) calcd for C<sub>89</sub>H<sub>80</sub>O<sub>23</sub>Na [M+Na]<sup>+</sup> 1539.4983, found 1539.4984.

### *p*-Methoxyphenyl

**(3,4,6-tri-*O*-benzyl-2-*O*-benzoyl- $\beta$ -D-glucopyranosyl)-(1 $\rightarrow$ 3)-(2-*O*-benzoyl-4-*O*-benzyl-6-*O*-(*tert*-butyldiphenylsilyl)- $\beta$ -D-glucopyranosyl)-(1 $\rightarrow$ 6)-2,3,4-tri-*O*-benzoyl- $\beta$ -D-glucopyranoside (30)**

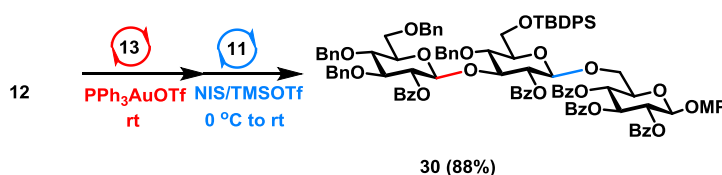

A suspension of glucosyl donor **12**<sup>[15]</sup> (40 mg, 0.054 mmol), acceptor **13** (34 mg, 0.042 mmol), and activated 3Å MS (200 mg) in dry CH<sub>2</sub>Cl<sub>2</sub> (1.2 mL) was stirred at room temperature for 30 min under Ar. Then a freshly prepared solution of PPh<sub>3</sub>AuOTf in CH<sub>2</sub>Cl<sub>2</sub> (0.8 mL, 0.01M) was added, the mixture was stirred at room temperature for 6 h. Then acceptor **11**<sup>[14]</sup> (25 mg, 0.042 mmol), NIS (14 mg, 0.062 mmol) and TMSOTf (0.1 mL, 22  $\mu$ L in 1 mL CH<sub>2</sub>Cl<sub>2</sub>, 0.012 mmol) were added successively at 0 °C. The reaction mixture was warmed gradually to room temperature and stirred for 3 h, then quenched with Et<sub>3</sub>N, filtered with Celite and concentrated *in vacuo*. The residue was purified by flash column chromatography (EtOAc/Petroleum ether =1/3) to give **30** (63 mg, 88 %) as a white solid:  $[\alpha]_D^{22} = +28.07$  (c 0.12, CHCl<sub>3</sub>); <sup>1</sup>H NMR (400 MHz, Chloroform-*d*)  $\delta$  7.96 -7.84 (m, 6H, Ar-H), 7.78 (d,  $J = 7.8$  Hz, 4H, Ar-H), 7.68 (d,  $J = 6.9$  Hz, 2H, Ar-H), 7.66 – 7.56 (m, 4H, Ar-H), 7.51 – 7.22 (m, 30H, Ar-H), 7.16 (d,  $J = 3.8$  Hz, 4H), 7.09 (d,  $J = 6.4$  Hz, 3H, Ar-H), 7.02 (d,  $J = 5.7$  Hz, 2H, Ar-H), 6.87 (d,  $J = 8.6$  Hz, 2H, Ar-H), 6.74 (d,  $J = 8.7$  Hz, 2H, Ar-H), 5.78 (t,  $J$



= 9.6 Hz, 1H, H-3), 5.58 (t,  $J$  = 8.7 Hz, 1H, H-2), 5.26 – 5.33 (m, 2H, H-4, H-2''), 5.15 (t,  $J$  = 8.1 Hz, 1H, H-2'), 5.11 (d,  $J$  = 10.8 Hz, 1H, H-Bn), 5.00 (d,  $J$  = 7.8 Hz, 1H, **H-1**), 4.89 (d,  $J$  = 8.0 Hz, 1H, **H-1''**), 4.76 (d,  $J$  = 10.8 Hz, 1H, H-Bn), 4.62 – 4.53 (m, 4H, **H-1'**), 4.51 – 4.42 (m, 3H), 4.24 (t,  $J$  = 8.6 Hz, 1H), 3.92 – 3.73 (m, 6H), 3.74 – 3.65 (m, 5H), 3.64 – 3.53 (m, 3H), 3.38 (d,  $J$  = 9.2 Hz, 1H), 0.99 (s, 9H).  $^{13}\text{C}$  NMR (101 MHz,  $\text{CDCl}_3$ )  $\delta$  165.73, 165.44, 165.29, 165.07, 164.54, 155.79, 151.18, 138.64, 138.43, 137.90, 137.65, 135.81, 135.61, 133.55, 133.42, 133.29, 133.23, 133.14, 133.02, 130.00, 129.93, 129.87, 129.82, 129.79, 129.70, 129.64, 129.29, 128.89, 128.73, 128.57, 128.53, 128.49, 128.44, 128.41, 128.36, 128.30, 128.26, 128.22, 128.18, 128.08, 127.95, 127.92, 127.72, 127.67, 127.52, 127.41, 119.27, 114.63, 100.98, 100.61, 100.24, 83.15, 79.56, 78.17, 76.01, 75.75, 75.57, 75.25, 75.06, 74.55, 74.14, 74.00, 73.53, 72.86, 71.85, 69.74, 69.13, 67.26, 62.90, 55.66, 26.84, 19.23. HRMS (ESI) calcd for  $\text{C}_{33}\text{H}_{36}\text{O}_8\text{SiNa}$   $[\text{M}+\text{Na}]^+$ : 615.2023, found: 615.2020. HRMS (ESI) calcd for  $\text{C}_{104}\text{H}_{100}\text{O}_{22}\text{SiNa}$   $[\text{M}+\text{Na}]^+$  1751.6368, found 1751.6360.

#### *p*-Methoxyphenyl

**(3,4,6-tri-*O*-benzyl-2-*O*-benzoyl- $\beta$ -D-glucopyranosyl)-(1 $\rightarrow$ 3)-(2-*O*-benzoyl-4-*O*-benzyl- $\beta$ -D-glucopyranosyl)-(1 $\rightarrow$ 6)-2,3,4-tri-*O*-benzoyl- $\beta$ -D-glucopyranoside (**31**)**

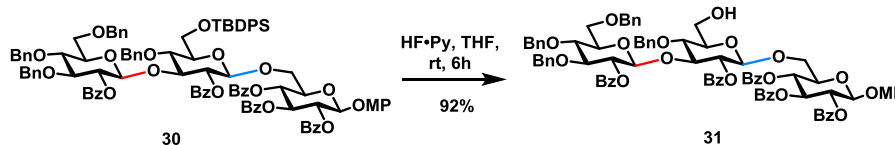

To a solution of compound **30** (121 mg, 0.07 mmol) in 1 mL THF was added 70% HF pyridine (100  $\mu\text{L}$ , 0.7 mmol) at room temperature. The mixture was stirred vigorously at room temperature for 6 h, then it was quenched with  $\text{NaHCO}_3$ , filtered and concentrated. The resulting residue was purified by silica gel column chromatography (EtOAc/Petroleum ether = 1/2) to afford **31** (96 mg, 92%) as a white solid;  $[\alpha]_{\text{D}}^{23}$  = +17.91 (c 0.25,  $\text{CHCl}_3$ );  $^1\text{H}$  NMR (400 MHz, Chloroform- $d$ )  $\delta$  7.93 (d,  $J$  = 7.8 Hz, 4H), 7.87 (d,  $J$  = 7.8 Hz, 4H), 7.80 (d,  $J$  = 7.8 Hz, 2H), 7.62 (t,  $J$  = 7.4 Hz, 2H), 7.52 – 7.39 (m, 8H), 7.38 – 7.31 (m, 5H), 7.37 – 7.19 (m, 16H), 7.18 – 7.13 (m, 2H), 7.08 (d,  $J$  = 6.9 Hz, 2H), 7.01 (d,  $J$  = 6.1 Hz, 2H), 6.84 (d,  $J$  = 8.8 Hz, 2H), 6.73 (d,  $J$  = 8.8 Hz, 2H), 5.77 (t,  $J$  = 9.6 Hz, 1H, H-3), 5.59 (t,  $J$  = 8.7 Hz, 1H, H-2), 5.46 (t,  $J$  = 9.5 Hz, 1H, H-4), 5.24 (t,  $J$  = 8.7 Hz, 1H, H-2''), 5.03 (d,  $J$  = 7.8 Hz, 1H, **H-1**), 4.99 (d,  $J$  = 11.0 Hz, 1H, H-Bn),

4.89 (t,  $J = 8.3$  Hz, 1H), 4.79 (d,  $J = 7.9$  Hz, 1H, **H-1''**), 4.75 (d,  $J = 11.0$  Hz, 1H, H-Bn), 4.60 – 4.44 (m, 7H, **H-1'**), 4.17 (t,  $J = 8.6$  Hz, 1H), 3.95 – 3.81 (m, 3H), 3.73 (d,  $J = 10.3$  Hz, 3H), 3.69 (s, 3H), 3.62 (dd,  $J = 11.0, 5.0$  Hz, 1H), 3.57 – 3.47 (m, 3H), 3.35 – 3.28 (m, 1H), 3.23 (t,  $J = 9.0$  Hz, 1H), 2.36 – 2.24 (m, 1H, H-OH).  $^{13}\text{C}$  NMR (101 MHz,  $\text{CDCl}_3$ )  $\delta$  165.96, 165.72, 165.26, 165.07, 164.32, 155.80, 151.09, 138.35, 138.29, 137.80, 137.63, 133.64, 133.38, 133.30, 133.27, 133.13, 130.00, 129.86, 129.81, 129.72, 129.61, 129.22, 128.86, 128.63, 128.53, 128.50, 128.45, 128.43, 128.41, 128.35, 128.32, 128.30, 128.25, 128.11, 127.97, 127.89, 127.67, 127.57, 127.51, 119.19, 114.59, 100.99, 100.13, 99.79, 82.98, 78.99, 78.11, 75.53, 75.50, 75.22, 75.13, 74.81, 73.95, 73.71, 73.52, 73.43, 72.70, 71.81, 70.49, 69.05, 67.46, 62.09, 55.64. HRMS (ESI) calcd for  $\text{C}_{88}\text{H}_{82}\text{O}_{22}\text{Na}$   $[\text{M}+\text{Na}]^+$  1513.5190, found 1513.5195.

## Methyl

(2,3,4,6-tetra-*O*-benzoyl- $\beta$ -D-glucopyranosyl)-(1 $\rightarrow$ 6)-(2,3,4-tri-*O*-benzoyl- $\beta$ -D-glucopyranosyl)-(1 $\rightarrow$ 3)-2,4,6-tri-*O*-benzyl- $\alpha$ -D-glucopyranoside (**32**)

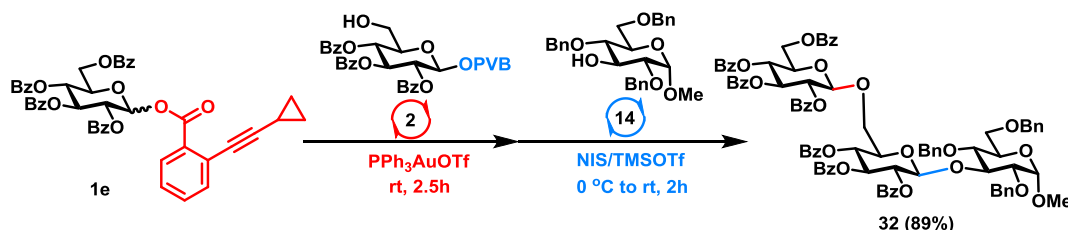

A mixture of ABz galactoside donor **1e**<sup>[4]</sup> (61.7 mg, 0.081 mmol), glucosyl PVB acceptor **2** (47 mg, 0.067 mmol), and activated 3Å MS (300 mg) in dry  $\text{CH}_2\text{Cl}_2$  (1.1 mL) was stirred at room temperature for 15 min, to which a freshly prepared solution of  $\text{PPh}_3\text{AuOTf}$  in  $\text{CH}_2\text{Cl}_2$  (1.0 mL, 0.014 M) was added to the mixture slowly. The resulting mixture was stirred at room temperature. After being stirred for another 2.5 h, the reaction mixture was cooled to 0 °C, to which glucosyl acceptor **14**<sup>[16]</sup> (26.2 mg, 0.057 mmol), NIS (19.1 mg, 0.085 mmol) and TMSOTf (3.0  $\mu\text{L}$ , 0.017 mmol) were added successively at 0 °C. The resulting mixture was warmed gradually to room temperature and stirred for 2 h, then was quenched with  $\text{Et}_3\text{N}$  (0.5 mL) and filtered. The filtrates were concentrated under vacuum to give a residue, which was purified by flash column chromatography (petroleum ether-EtOAc, 3.4:1), followed by purification over a Sephadex<sup>TM</sup> LH-20 column (DCM/MeOH 1:1) to afford **32** (76 mg, 89%) as a syrup.  $[\alpha]_{\text{D}}^{29} = +16.65$  ( $c$  0.15,

CHCl<sub>3</sub>); <sup>1</sup>H NMR (400 MHz, Chloroform-*d*) δ 8.24 (d, *J* = 7.6 Hz, 2H, Ar), 8.02 (d, *J* = 7.7 Hz, 2H, Ar), 7.97 (d, *J* = 7.8 Hz, 2H, Ar), 7.92 – 7.79 (m, 8H, Ar), 7.57 – 7.46 (m, 7H, Ar), 7.45 – 7.25 (m, 27H, Ar), 7.09 (dd, *J* = 6.6, 2.8 Hz, 2H, Ar), 5.87 (t, *J* = 9.7 Hz, 1H, H-3''), 5.76 (t, *J* = 9.6 Hz, 1H), 5.64 (dd, *J* = 10.0, 7.9 Hz, 1H, H-2''), 5.60 – 5.49 (m, 3H, **H-1'**, H-4'), 5.43 (t, *J* = 9.8 Hz, 1H, H-4''), 5.37 (d, *J* = 7.9 Hz, 1H, **H-1''**), 5.23 (d, *J* = 11.1 Hz, 1H, H-Bn), 4.77 (d, *J* = 11.1 Hz, 1H, H-Bn), 4.68 (d, *J* = 12.0 Hz, 1H, H-Bn), 4.63 – 4.52 (m, 4H, **H-1**, H-Bn, H-Bn), 4.31 (d, *J* = 10.0 Hz, 1H), 4.24 (d, *J* = 12.4 Hz, 1H, H-Bn), 4.10 (dd, *J* = 12.5, 8.7 Hz, 2H), 4.02 (dd, *J* = 12.4, 2.9 Hz, 1H), 3.97 – 3.84 (m, 5H, H-5''), 3.62 – 3.56 (m, 1H, H-5'), 3.46 (dd, *J* = 9.6, 3.5 Hz, 1H), 3.11 (s, 3H, 3H-OCH<sub>3</sub>). <sup>13</sup>C NMR (151 MHz, CDCl<sub>3</sub>) δ 166.23, 165.84, 165.81, 165.56, 165.45, 165.27, 164.93, 138.62, 138.26, 138.12, 133.66, 133.35, 133.33, 133.30, 133.13, 133.05, 130.42, 129.96, 129.93, 129.85, 129.79, 129.78, 129.76, 129.33, 129.32, 129.08, 129.04, 128.86, 128.70, 128.67, 128.64, 128.53, 128.48, 128.42, 128.40, 128.38, 128.35, 128.03, 127.94, 127.85, 127.58, 101.21, 100.15, 98.24, 81.05, 79.98, 77.04, 76.39, 76.10, 73.88, 73.80, 73.06, 72.72, 72.44, 71.48, 71.27, 69.99, 69.93, 69.74, 68.80, 66.74, 62.52, 55.25. HRMS (ESI) calcd for C<sub>89</sub>H<sub>80</sub>O<sub>23</sub>Na [M+Na]<sup>+</sup> 1539.4983, found 1539.4979.

#### *N*-benzyl-benzyloxycarbonyl-5-aminopentyl

#### (2,3,4,6-tetra-*O*-benzoyl-β-D-glucopyranosyl)-(1→6)-(2,3,4-tri-*O*-benzoyl-β-D-glucopyranosyl)-(1→6)-2,3,4-tri-*O*-benzoyl-β-D-glucopyranoside (**33**)

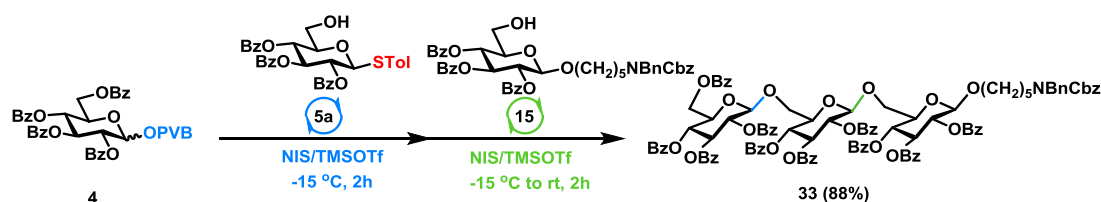

A mixture of PVB galactoside donor **4**<sup>[7]</sup> (50.6 mg, 0.063 mmol), thioglycoside acceptor **5a**<sup>[8]</sup> (37.7 mg, 0.063 mmol), and activated 3 Å MS (300 mg) in dry CH<sub>2</sub>Cl<sub>2</sub> (1.1 mL) was stirred at room temperature for 15 min and was then cooled to -15 °C. NIS (14.2 mg, 0.063 mmol) and TMSOTf (3.4 μL, 0.019 mmol) were added successively. After being stirred at -15 °C for another 2 h, to which glucosyl acceptor **15**<sup>[9]</sup> (42.4 mg, 0.053 mmol) and NIS (17.9 mg, 0.079 mmol) and TMSOTf (3.0 μL, 0.016 mmol) were added successively at -15 °C. The resulting mixture was warmed gradually to room temperature and stirred for 2 h, then was quenched with Et<sub>3</sub>N (0.8 mL)

and filtered. The filtrates were concentrated under vacuum to give a residue, which was purified by flash column chromatography (petroleum ether-EtOAc, 2.5:1) to afford **33** (86.3 mg, 88%) as a syrup.  $[\alpha]_D^{29} = -12.69$  (c 0.14,  $\text{CHCl}_3$ );  $^1\text{H}$  NMR (400 MHz,  $\text{CHCl}_3$ )  $\delta$  8.09 (d,  $J = 7.8$  Hz, 4H, Ar), 8.02 (d,  $J = 7.8$  Hz, 2H), 8.00 – 7.91 (m, 8H, Ar), 7.91 – 7.83 (m, 4H, Ar), 7.80 (d,  $J = 7.8$  Hz, 2H, Ar), 7.61 – 7.25 (m, 35H, Ar), 7.24 – 7.14 (m, 5H, Ar), 6.20 (t,  $J = 9.8$  Hz, 1H), 5.94 (t,  $J = 9.6$  Hz, 1H), 5.81 – 5.69 (m, 2H), 5.65 – 5.53 (m, 3H), 5.32 (t,  $J = 8.8$  Hz, 1H), 5.27 – 5.14 (m, 4H, **H-1'**), 4.78 – 4.62 (m, 3H, **H-1'**, **H-1**), 4.54 (dd,  $J = 12.2, 5.3$  Hz, 1H), 4.49 – 4.33 (m, 3H), 4.16 (d,  $J = 10.9$  Hz, 1H), 4.05 (d,  $J = 10.9$  Hz, 1H), 4.02 – 3.89 (m, 3H), 3.82 – 3.69 (m, 2H, H-Linker), 3.32 – 3.16 (m, 1H, H-Linker), 3.11 – 2.90 (m, 2H, 2H-Linker), 1.48 – 1.32 (m, 4H, 4H-Linker), 1.18 – 1.02 (m, 2H, 2H-Linker);  $^{13}\text{C}$  NMR (101 MHz,  $\text{CDCl}_3$ )  $\delta$  166.15, 165.80, 165.78, 165.64, 165.58, 165.31, 165.00, 164.95, 156.66, 156.01, 138.02, 136.90, 133.51, 133.32, 133.20, 133.12, 130.03, 129.97, 129.84, 129.81, 129.78, 129.69, 129.64, 129.47, 129.38, 129.35, 129.04, 128.96, 128.90, 128.84, 128.82, 128.70, 128.65, 128.55, 128.47, 128.37, 128.33, 128.28, 128.21, 128.03, 127.86, 127.76, 127.32, 127.29, 127.26, 127.13, 101.37, 101.07, 100.93, 77.36, 74.43, 73.56, 72.92, 72.73, 72.28, 72.15, 71.93, 71.89, 70.84, 69.66, 69.63, 68.92, 68.27, 67.12, 63.27, 50.59, 50.27, 47.16, 46.19, 29.73, 28.95, 27.79, 27.40, 23.11. HRMS (ESI) calcd for  $\text{C}_{108}\text{H}_{95}\text{NO}_{28}\text{Na}$   $[\text{M}+\text{Na}]^+$  1876.5933, found 1876.5933.

**(2,3,4,6-Tetra-*O*-benzoyl- $\beta$ -D-glucopyranosyl)-(1 $\rightarrow$ 6)-(2,3,4-tri-*O*-benzoyl- $\beta$ -D-glucopyranosyl)-(1 $\rightarrow$ 6)-1,2:3,4-*O*-diisopropylidene- $\alpha$ -D-galactopyranose (**34**)**

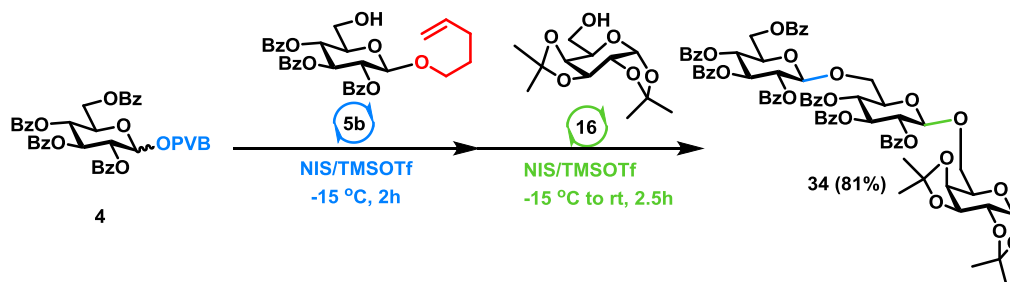

A mixture of PVB galactoside donor **4**<sup>[7]</sup> (78.8 mg, 0.098 mmol), glucosyl acceptor **5b**<sup>[9]</sup> (50 mg, 0.089 mmol), and activated 3Å MS (300 mg) in dry  $\text{CH}_2\text{Cl}_2$  (1.6 mL) was stirred at room temperature for 15 min and was then cooled to  $-15$  °C. NIS (20.1 mg, 0.089 mmol) and TMSOTf (4.8  $\mu\text{L}$ , 0.027 mmol) were added successively. After being stirred at  $-15$  °C for another 2h, to which acceptor **16** (19.5 mg, 0.075 mmol), NIS (25.3 mg, 0.113 mmol) and TMSOTf (4.1  $\mu\text{L}$ ,

0.022 mmol) were added successively at -15 °C. The resulting mixture was warmed gradually to room temperature and stirred for 2.5 h, then was quenched with Et<sub>3</sub>N (0.5mL) and filtered. The filtrates were concentrated under vacuum to give a residue, which was purified by flash column chromatography (petroleum ether-EtOAc, 2.7:1 to 2.5:1) to afford **34** (79.6 mg, 81%) as a syrup.  $[\alpha]_D^{29} = -18.29$  (*c* 0.11, CHCl<sub>3</sub>); <sup>1</sup>H NMR (400 MHz, Chloroform-*d*) δ 8.09 – 8.02 (m, 4H, Ar), 7.96 (d, *J* = 7.8 Hz, 2H, Ar), 7.91 (d, *J* = 7.7 Hz, 2H, Ar), 7.89 – 7.83 (m, 4H, Ar), 7.80 (d, *J* = 7.7 Hz, 2H, Ar), 7.58 (t, *J* = 7.4 Hz, 1H, Ar), 7.55 – 7.47 (m, 5H, Ar), 7.47 – 7.33 (m, 12H, Ar), 7.32 – 7.26 (m, 3H, Ar), 5.90 (t, *J* = 9.6 Hz, 1H, H-3''), 5.82 (t, *J* = 9.5 Hz, 1H, H-3'), 5.63 (t, *J* = 9.6 Hz, 1H, H-4''), 5.54 (t, *J* = 8.8 Hz, 1H, H-2''), 5.48 – 5.35 (m, 3H, **H-1**, H-2', H-4'), 5.05 (d, *J* = 7.8 Hz, 1H, **H-1''**), 4.84 (d, *J* = 7.8 Hz, 1H, **H-1'**), 4.62 (dd, *J* = 12.2, 3.1 Hz, 1H), 4.54 – 4.44 (m, 2H, H-3), 4.25 (dd, *J* = 5.0, 2.3 Hz, 1H, H-2), 4.20 – 4.13 (m, 2H, H-5''), 4.12 – 4.01 (m, 2H, H-5'), 4.00 – 3.92 (m, 2H), 3.88 (t, *J* = 6.0 Hz, 1H), 3.73 (dd, *J* = 10.9, 6.5 Hz, 1H), 1.48 (s, 3H, 3H-CH<sub>3</sub>), 1.33 (s, 3H, 3H-CH<sub>3</sub>), 1.23 (s, 6H, 3H-CH<sub>3</sub>, 3H-CH<sub>3</sub>). <sup>13</sup>C NMR (151 MHz, CDCl<sub>3</sub>) δ 166.18, 165.75, 165.36, 165.24, 165.21, 165.13, 133.49, 133.26, 133.23, 133.20, 133.07, 130.04, 129.92, 129.90, 129.87, 129.81, 129.65, 129.49, 129.34, 128.99, 128.92, 128.90, 128.87, 128.52, 128.49, 128.46, 128.36, 128.31, 128.26, 109.36, 108.45, 101.34, 101.22, 96.23, 74.07, 73.00, 72.97, 72.34, 71.87, 71.76, 70.93, 70.62, 70.57, 69.98, 69.74, 68.52, 68.19, 67.27, 63.14, 26.11, 25.84, 24.96, 24.33. HRMS (ESI) calcd for C<sub>73</sub>H<sub>68</sub>O<sub>23</sub>Na [M+Na]<sup>+</sup> 1335.4044, found 1335.4034.

## Methyl

(2,3,4,6-tetra-*O*-benzoyl-β-D-glucopyranosyl)-(1→6)-(2,3,4-tri-*O*-benzoyl-β-D-galactopyranosyl)-(1→6)-(2,3,4-tri-*O*-benzoyl-β-D-glucopyranosyl)-(1→6)-2,3,4-tri-*O*-benzyl-α-D-glucopyranoside (**35**)

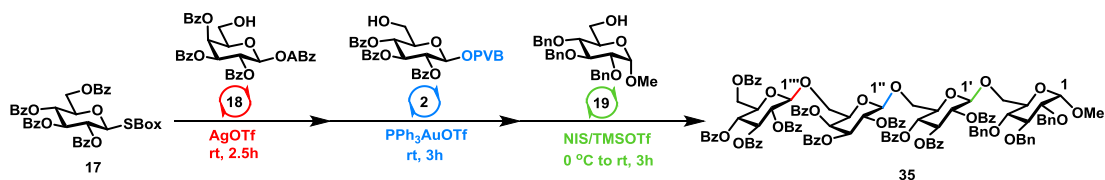

A suspension of SBox glucoside donor **17**<sup>[5]</sup> (167.1mg, 0.23mmol), galactosyl ABz **18**<sup>[9]</sup> (125.4 mg, 0.19 mmol), and activated 3Å MS (700 mg) in dry CH<sub>2</sub>Cl<sub>2</sub> (3mL) was stirred at room temperature for 15 min, to which AgOTf (97.6 mg, 0.38 mmol) was added to the mixture. After

being stirred at room temperature for 2.5h, glucosyl PVB **2** (119.5 mg, 0.171 mmol) and a freshly prepared solution of  $\text{PPh}_3\text{AuOTf}$  in  $\text{CH}_2\text{Cl}_2$  (1 mL, 0.038 M) were added successively. The resulting mixture was stirred at room temperature for another 3h, the reaction mixture was cooled to 0 °C, then acceptor **19**<sup>[17]</sup> (71 mg, 0.154 mmol), NIS (42.7mg, 0.19 mmol) and TMSOTf (8.7  $\mu\text{L}$ , 0.048 mmol) were added successively at 0 °C. The resulting mixture was warmed gradually to room temperature and stirred for 3 h, then was quenched with  $\text{Et}_3\text{N}$  (3.0mL) and filtered. The filtrates were concentrated under vacuum to give a residue, which was purified by flash column chromatography (petroleum ether-EtOAc, 2.6:1 to 1.5:1), followed by purification over a Sephadex<sup>TM</sup> LH-20 column (DCM/MeOH 1:1) to afford **35**<sup>[9]</sup> (199.3 mg, 65%) as a syrup. <sup>1</sup>H NMR (400 MHz, Chloroform-*d*)  $\delta$  8.10 – 7.85 (m, 16H, Ar), 7.81 – 7.71 (m, 4H, Ar), 7.58 – 7.47 (m, 5H, Ar), 7.46 – 7.15 (m, 38H, Ar), 7.02 (d,  $J = 7.1$  Hz, 2H, Ar), 6.03 (t,  $J = 9.7$  Hz, 1H, H-3'''), 5.90 – 5.77 (m, 2H, H-3', H-4''), 5.74 – 5.64 (m, 2H, H-2'', H-4'''), 5.59 – 5.36 (m, 4H, H-2', H-4', H-3'', H-2'''), 5.00 (d,  $J = 7.9$  Hz, 1H, H-1'''), 4.91 (d,  $J = 10.9$  Hz, 1H, H-Bn), 4.80 – 4.72 (m, 2H, H-1'', H-Bn), 4.68 (d,  $J = 11.0$  Hz, 1H, H-Bn), 4.64 – 4.55 (m, 2H, H-1, H-Bn), 4.54 – 4.46 (m, 2H, H-1'), 4.42 (d,  $J = 11.3$  Hz, 1H, H-Bn), 4.30 (dd,  $J = 12.4, 4.8$  Hz, 1H), 4.22 (d,  $J = 11.4$  Hz, 1H, H-Bn), 4.16 (d,  $J = 9.8$  Hz, 1H), 4.10 – 3.99 (m, 3H), 3.96 – 3.77 (m, 5H), 3.47 (d,  $J = 10.1$  Hz, 1H), 3.43 – 3.21 (m, 6H, H-2, 3H-OCH<sub>3</sub>).

#### Pent-4-enyl

(2,3,4,6-tetra-*O*-benzoyl- $\beta$ -D-glucopyranosyl)-(1 $\rightarrow$ 6)-(2,3,4-tri-*O*-benzoyl- $\beta$ -D-glucopyranosyl)-(1 $\rightarrow$ 6)-(3,4-di-*O*-benzyl-2-*O*-benzoyl- $\beta$ -D-glucopyranosyl)-(1 $\rightarrow$ 6)-2,3,4-tri-*O*-benzyl- $\beta$ -D-glucopyranoside (**36**)

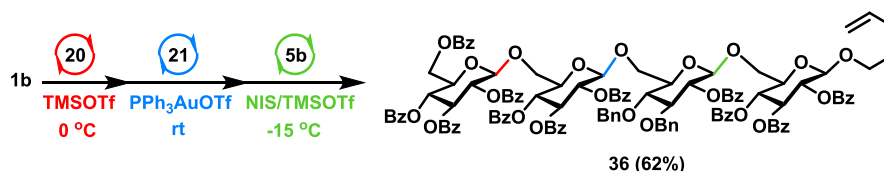

A suspension of glucosyl donor **1b**<sup>[3]</sup> (61 mg, 0.080 mmol), acceptor **20**<sup>[9]</sup> (45 mg, 0.067 mmol), and activated 3Å MS (180 mg) in dry  $\text{CH}_2\text{Cl}_2$  (1.7 mL) was stirred at room temperature for 30 min under Ar. Then the mixture was cooled to 0 °C and a solution of TMSOTf in  $\text{CH}_2\text{Cl}_2$  (0.1 mL, 24  $\mu\text{L}$  in 1 mL  $\text{CH}_2\text{Cl}_2$ , 0.0135 mmol) was added to the mixture dropwise. After being stirred at

0 °C for another 1.0 h, the reaction mixture was warmed to room temperature, to which glucosyl PVB acceptor **21** (43.0 mg, 0.061 mmol) and a freshly prepared solution of PPh<sub>3</sub>AuOTf in CH<sub>2</sub>Cl<sub>2</sub> (0.7 mL, 0.02 M, 0.014 mmol) were added successively. The resulting mixture was stirred at room temperature for another 2.0 h, then acceptor **5b**<sup>[9]</sup> (42 mg, 0.073 mmol), NIS (17 mg, 0.073 mmol) and TMSOTf (0.1 mL, 22 µL in 1 mL CH<sub>2</sub>Cl<sub>2</sub>, 0.012 mmol) were added successively at -15 °C. The reaction mixture was stirred at -15 °C for 3 h, then quenched with Et<sub>3</sub>N, filtered with Celite and concentrated *in vacuo*. The residue was purified by flash column chromatography (EtOAc/Petroleum ether =1/2.5) to give **36** (77 mg, 62 %) as a white solid:  $[\alpha]_D^{23} = -2.05$  (c 0.17, CHCl<sub>3</sub>); <sup>1</sup>H NMR (400 MHz, Chloroform-*d*) δ 8.11 -7.07 (m, 18H), 7.60 (t, *J* = 7.8 Hz, 4H), 7.57 – 7.48 (m, 4H), 7.46 – 7.29 (m, 17H), 7.28 – 6.99 (m, 16H), 6.97 – 6.87 (m, 4H), 6.78 (t, *J* = 7.7 Hz, 2H), 6.18 (t, *J* = 9.7 Hz, 1H, H-3''), 5.88 (q, *J* = 10.0 Hz, 2H), 5.75 – 5.59 (m, 4H), 5.50 (q, *J* = 9.3 Hz, 2H), 5.38 (t, *J* = 9.6 Hz, 1H), 5.18 (t, *J* = 8.6 Hz, 1H, H-2'), 5.02 (d, *J* = 7.8 Hz, 1H, H-1''), 4.83 (d, *J* = 10.3 Hz, 1H), 4.78 (d, *J* = 17.1 Hz, 1H), 4.74 – 4.60 (m, 4H, H-1', H-1'', H-1), 4.54 (d, *J* = 11.2 Hz, 2H), 4.42 (d, *J* = 5.6 Hz, 1H), 4.33 (s, 1H), 4.28 (dd, *J* = 7.7, 4.0 Hz, 1H), 4.24 (d, *J* = 11.1 Hz, 1H), 4.10 – 3.95 (m, 5H), 3.87 (dd, *J* = 11.9, 8.8 Hz, 1H), 3.79 (dt, *J* = 10.7, 5.6 Hz, 1H), 3.73 (d, *J* = 10.8 Hz, 1H), 3.62 (t, *J* = 9.1 Hz, 1H), 3.52 (t, *J* = 9.3 Hz, 1H), 3.40 – 3.28 (m, 2H), 2.87 – 2.78 (m, 1H), 1.98 – 1.81 (m, 2H), 1.59 – 1.40 (m, 2H). <sup>13</sup>C NMR (151 MHz, CDCl<sub>3</sub>) δ 166.27, 166.00, 165.91, 165.90, 165.86, 165.47, 165.32, 165.27, 165.22, 165.16, 164.97, 138.08, 138.06, 137.92, 133.71, 133.57, 133.50, 133.37, 133.34, 133.32, 133.30, 133.19, 133.07, 130.30, 130.16, 130.14, 130.08, 130.03, 129.98, 129.95, 129.92, 129.89, 129.87, 129.73, 129.71, 129.69, 129.67, 129.65, 129.29, 129.04, 128.97, 128.93, 128.86, 128.78, 128.71, 128.68, 128.61, 128.59, 128.56, 128.53, 128.46, 128.45, 128.43, 128.40, 128.31, 128.22, 128.01, 127.99, 127.77, 127.75, 127.65, 115.13, 101.99, 101.32, 101.27, 100.77, 83.14, 75.40, 74.96, 74.66, 74.13, 74.02, 73.93, 73.03, 72.96, 72.90, 72.75, 72.34, 72.19, 72.00, 70.59, 69.90, 69.76, 69.64, 69.30, 67.89, 67.63, 63.30, 30.02, 29.90, 28.74. HRMS (ESI) calcd for C<sub>120</sub>H<sub>106</sub>O<sub>32</sub>Na<sub>2</sub> [M+2Na]<sup>2+</sup> 1052.3226, found 1052.3223.

#### ***p*-Methoxyphenyl**

**[2-O-benzoyl-4-O-benzyl-(3,6-di-O-(2-O-benzoyl-3,4,6-tri-O-benzyl-β-D-glucopyranosyl)-β-**

**D-glucopyranosyl]-(1→6)-(2-O-benzoyl-3,4-di-O-benzyl-β-D-glucopyranosyl)-(1→6)-[2-O-benzoyl-4-O-benzyl-(3-O-(2-O-benzoyl-3,4,6-tri-O-benzyl-β-D-glucopyranosyl)-β-D-glucopyranosyl]-(1→6)-2,3,4-tri-O-benzoyl-β-D-glucopyranoside (37)**

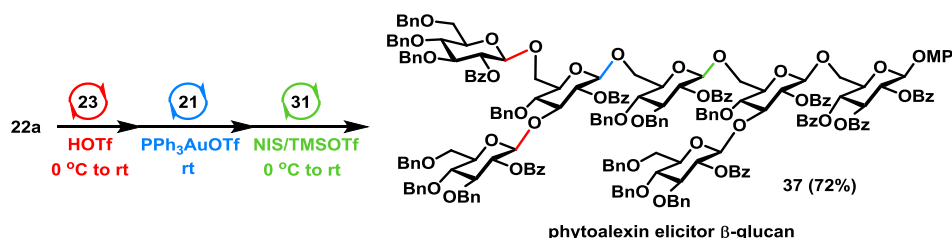

A suspension of glucosyl donor **22a**<sup>[18]</sup> (60 mg, 0.083 mmol), acceptor **23** (18 mg, 0.033 mmol), and activated 3 Å MS (200 mg) in dry CH<sub>2</sub>Cl<sub>2</sub> (1.5 mL) was stirred at room temperature for 30 min under Ar. Then the mixture was cooled to 0 °C and a solution of TfOH in CH<sub>2</sub>Cl<sub>2</sub> (0.1 mL, 6 μL in 1 mL CH<sub>2</sub>Cl<sub>2</sub>, 0.007 mmol) was added to the mixture dropwise. After being stirred at 0 °C for another 1h, the reaction mixture was warmed to room temperature, to which glucosyl PVB acceptor **21** (21.0 mg, 0.03 mmol) and a freshly prepared solution of PPh<sub>3</sub>AuOTf in CH<sub>2</sub>Cl<sub>2</sub> (0.7 mL, 0.01 M, 0.007 mmol) were added successively. The resulting mixture was stirred at room temperature for another 2.5 h, then acceptor **31** (44 mg, 0.03 mmol), NIS (11 mg, 0.045 mmol) and TMSOTf (0.1 mL, 11 μL in 1 mL CH<sub>2</sub>Cl<sub>2</sub>, 0.006 mmol) were added successively at 0 °C. The reaction mixture was warmed gradually to room temperature and stirred for 3 h, then quenched with Et<sub>3</sub>N, filtered with Celite and concentrated *in vacuo*. The residue was purified by flash column chromatography (EtOAc/Petroleum ether =1/2) to give **37** (72 mg, 72 %) as a white solid:  $[\alpha]_D^{23} = +21.13$  (c 0.14, CHCl<sub>3</sub>); <sup>1</sup>H NMR (400 MHz, Chloroform-*d*) δ 7.95 – 7.63 (m, 18H), 7.55 – 7.40 (m, 4H), 7.38 – 6.89 (m, 88H), 6.72 (d, *J* = 8.8 Hz, 2H), 6.63 (d, *J* = 8.8 Hz, 2H), 5.62 (t, *J* = 9.6 Hz, 1H), 5.47 (t, *J* = 8.8 Hz, 1H), 5.22 – 5.09 (m, 4H), 5.04 – 4.96 (m, 2H), 4.87 (d, *J* = 11.2 Hz, 1H), 4.80 – 4.61 (m, 8H), 4.61 – 4.24 (m, 22H), 4.20 – 4.01 (m, 7H), 3.89 (t, *J* = 7.9 Hz, 1H), 3.77 – 3.51 (m, 16H), 3.51 – 3.28 (m, 12H), 3.28 – 3.05 (m, 5H), 2.96 (t, *J* = 8.3 Hz, 2H). <sup>13</sup>C NMR (151 MHz, CDCl<sub>3</sub>) δ 164.66, 164.40, 164.21, 164.07, 163.99, 163.34, 162.90, 154.67, 149.86, 137.43, 137.30, 137.29, 137.16, 137.15, 137.11, 137.08, 136.80, 136.75, 136.57, 136.55, 132.37, 132.20, 132.16, 132.09, 132.00, 131.98, 131.95, 128.97, 128.95, 128.90, 128.88, 128.79, 128.77, 128.74, 128.71, 128.70, 128.66, 128.58, 128.53, 128.24, 127.82, 127.77, 127.63, 127.60, 127.57, 127.50, 127.46, 127.43, 127.39, 127.36, 127.31, 127.29, 127.24, 127.20, 127.16, 127.14,



127.11, 127.06, 127.03, 127.00, 126.97, 126.89, 126.86, 126.81, 126.76, 126.73, 126.67, 126.64, 126.61, 126.57, 126.54, 126.52, 126.49, 126.43, 126.40, 126.37, 126.35, 126.30, 118.09, 113.46, 100.22, 99.87, 99.62, 99.50, 99.10, 98.86, 98.50, 81.99, 81.94, 81.67, 81.51, 78.08, 77.98, 77.13, 77.04, 76.90, 76.21, 76.16, 76.00, 75.79, 74.91, 74.48, 74.43, 74.18, 74.16, 74.07, 74.02, 73.98, 73.93, 73.84, 73.65, 73.47, 73.17, 73.11, 73.01, 72.80, 72.78, 72.61, 72.56, 72.47, 72.42, 72.40, 71.62, 70.80, 68.70, 67.98, 67.94, 67.62, 67.58, 66.12, 65.96, 65.53, 54.52. HRMS (ESI) calcd for  $C_{203}H_{192}O_{46}Na_2 [M+2Na]^{2+}$  1705.6235, found 1705.6233.

## Methyl

**(2,3,4,6-tetra-*O*-benzoyl- $\beta$ -D-glucopyranosyl)-(1 $\rightarrow$ 6)-(2,3,4-tri-*O*-benzoyl- $\beta$ -D-glucopyranosyl)-(1 $\rightarrow$ 6)-(2-*O*-benzoyl-3,4-di-*O*-benzyl- $\beta$ -D-glucopyranosyl)-(1 $\rightarrow$ 6)-(2,3,4-tri-*O*-benzoyl- $\beta$ -D-glucopyranosyl)-(1 $\rightarrow$ 6)-2,3,4-tri-*O*-benzyl- $\alpha$ -D-glucopyranoside (**38**)**

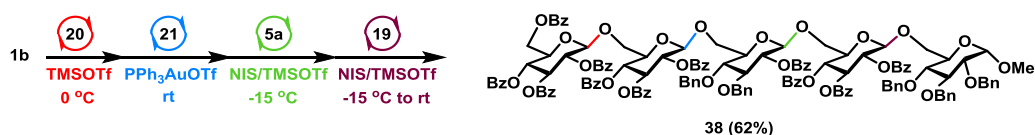

A suspension of glucosyl donor **1b**<sup>[9]</sup> (54 mg, 0.071 mmol), glucosyl ABz acceptor **20**<sup>[9]</sup> (40 mg, 0.060 mmol), and activated 3Å MS (160 mg) in dry  $CH_2Cl_2$  (1.6 mL) was stirred at room temperature for 30 min under Ar. Then the mixture was cooled to 0 °C and a solution of TMSOTf in  $CH_2Cl_2$  (0.1 mL, 21 µL in 1 mL  $CH_2Cl_2$ , 0.012 mmol) was added to the mixture dropwise. After being stirred at 0 °C for another 1.0 h, the reaction mixture was warmed to room temperature, to which glucosyl PVB acceptor **21** (38 mg, 0.054 mmol) and a freshly prepared solution of  $PPh_3AuOTf$  in  $CH_2Cl_2$  (1 mL, 0.012M) were added successively. The resulting mixture was stirred at room temperature for another 2.0 h. Then it was cooled to -15 °C, and acceptor **5a**<sup>[8]</sup> (32 mg, 0.054 mmol), NIS (13 mg, 0.057 mmol), TMSOTf (0.1 mL, 20 µL in 1 mL  $CH_2Cl_2$ , 0.0114 mmol) were added successively. The above mixture was kept stirring for 3 h at -15 °C, then acceptor **19**<sup>[17]</sup> (23 mg, 0.049 mmol), NIS (17 mg, 0.077 mmol), TMSOTf (0.1 mL, 10 µL in 1 mL  $CH_2Cl_2$ , 0.005 mmol) were added successively. The resulting mixture was warmed gradually to room temperature and stirred for 2 h, then quenched with  $Et_3N$ , filtered with Celite and concentrated *in vacuo*. The residue was purified by flash column chromatography (EtOAc/Petroleum ether =1/2) to give **38** (73 mg, 62 %) as a white solid:  $[\alpha]_D^{23} = -2.54$  (c 0.18,

CHCl<sub>3</sub>); <sup>1</sup>H NMR (400 MHz, Chloroform-*d*) δ 7.99 – 7.80 (m, 10H), 7.79 – 7.67 (m, 8H), 7.57 – 7.49 (m, 1H), 7.41 – 6.96 (m, 48 H), 6.93 – 6.80 (m, 7H), 6.69 (t, *J* = 7.7 Hz, 2H), 6.08 (t, *J* = 9.7 Hz, 1H), 5.78 (q, *J* = 9.4 Hz, 2H), 5.66 – 5.44 (m, 3H, **H-1**), 5.44 (dt, *J* = 12.4, 8.8 Hz, 2H), 5.30 (t, *J* = 9.7 Hz, 1H), 5.08 (t, *J* = 8.5 Hz, 1H), 4.94 (d, *J* = 7.8 Hz, 1H, **H-1'''**), 4.80 (d, *J* = 11.0 Hz, 1H), 4.67 – 4.55 (m, 5H, **H-1'**, **H-1''**), 4.54 – 4.37 (m, 7H, **H-1''**), 4.35 – 4.07 (m, 7H), 4.06 – 3.72 (m, 9H), 3.65 (d, *J* = 10.7 Hz, 1H), 3.56 – 3.34 (m, 5H), 3.34 – 3.23 (m, 3H), 3.16 (s, 3H), 2.74 (d, *J* = 9.7 Hz, 1H). <sup>13</sup>C NMR (151 MHz, CDCl<sub>3</sub>) δ 166.22, 165.90, 165.89, 165.85, 165.83, 165.45, 165.33, 165.18, 165.16, 164.96, 139.05, 138.49, 138.33, 138.13, 137.96, 133.70, 133.54, 133.51, 133.35, 133.32, 133.30, 133.28, 133.17, 133.11, 133.07, 130.12, 130.02, 129.98, 129.90, 129.88, 129.84, 129.82, 129.73, 129.69, 129.67, 129.60, 128.99, 128.93, 128.89, 128.74, 128.63, 128.59, 128.56, 128.52, 128.48, 128.46, 128.41, 128.38, 128.36, 128.30, 128.24, 128.20, 128.03, 127.99, 127.90, 127.82, 127.73, 127.68, 127.66, 127.63, 127.62, 127.54, 127.44, 101.89, 101.39, 101.16, 100.73, 98.36, 83.15, 82.02, 80.02, 75.54, 75.48, 74.75, 74.64, 74.53, 74.12, 73.99, 73.96, 73.60, 72.99, 72.90, 72.86, 72.66, 72.29, 72.05, 71.94, 70.34, 69.85, 69.73, 69.60, 68.20, 67.59, 67.47, 63.24, 55.39. HRMS (ESI) calcd for C<sub>143</sub>H<sub>128</sub>O<sub>37</sub>Na<sub>2</sub> [M+2Na]<sup>2+</sup> 1241.3959, found 1241.3952.

## Methyl

(2,3,4,6-tetra-*O*-benzoyl-β-D-glucopyranosyl)-(1→6)-(2,3,4-tri-*O*-benzoyl-β-D-glucopyranosyl)-(1→6)-(2-*O*-benzoyl-3,4-di-*O*-benzyl-β-D-glucopyranosyl)-(1→6)-(2,3,4-tri-*O*-benzoyl-β-D-glucopyranosyl)- (1→6)-2,3,4-tri-*O*-benzyl-α-D-mannopyranoside (**39**)

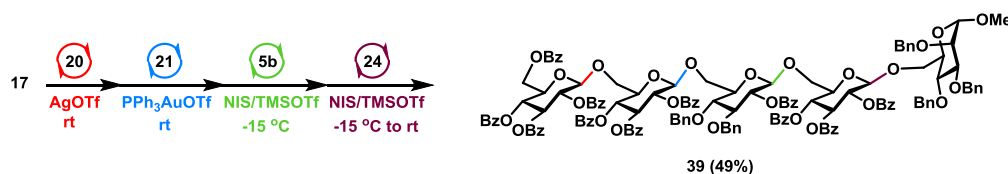

A suspension of glucosyl donor **17**<sup>[5]</sup> (60 mg, 0.082 mmol), glucosyl ABz acceptor **20**<sup>[9]</sup> (46 mg, 0.070 mmol), and activated 3Å MS (200 mg) in dry CH<sub>2</sub>Cl<sub>2</sub> (2.0 mL) was stirred at room temperature for 30 min under Ar. Then AgOTf (36 mg, 0.14 mmol) was added at room temperature, after being stirred for 2.0 h, glucosyl PVB acceptor **21** (44 mg, 0.063 mmol) and a freshly prepared solution of PPh<sub>3</sub>AuOTf in CH<sub>2</sub>Cl<sub>2</sub> (0.7 mL, 0.02 M) were added. The resulting

mixture was stirred at room temperature for another 3.0 h. Then it was cooled to - 15 °C, and acceptor **5b**<sup>[8]</sup> (43 mg, 0.076 mmol), NIS (17 mg, 0.075 mmol), TMSOTf (0.1 mL, 34 µL in 1 mL CH<sub>2</sub>Cl<sub>2</sub>, 0.019 mmol) were added successively. The above mixture was kept stirring for 3 h at - 15 °C, then acceptor **24**<sup>[19]</sup> (26 mg, 0.057 mmol), NIS (20 mg, 0.088 mmol), TMSOTf (0.1 mL, 11 µL in 1 mL CH<sub>2</sub>Cl<sub>2</sub>, 0.006 mmol) were added successively. The resulting mixture was warmed gradually to room temperature and stirred for 2 h, then quenched with Et<sub>3</sub>N, filtered with Celite and concentrated *in vacuo*. The residue was purified by flash column chromatography (EtOAc/Petroleum ether = 1/2) and Sephadex LH-20 (CHCl<sub>2</sub>/MeOH = 1/1) to give **39** (68 mg, 49 %) as a white solid:  $[\alpha]_D^{23} = -9.10$  (c 0.19, CHCl<sub>3</sub>); <sup>1</sup>H NMR (400 MHz, Chloroform-*d*) δ 8.03 – 7.82 (m, 10H), 7.80 – 7.67 (m, 8H), 7.51 – 7.42 (m, 5H), 7.41 – 6.95 (m, 50H), 6.93 – 6.85 (m, 2H), 6.83 – 6.71 (m, 3H), 6.60 (t, *J* = 7.7 Hz, 2H), 6.15 (t, *J* = 9.6 Hz, 1H), 5.80 (t, *J* = 9.9 Hz, 2H), 5.74 – 5.64 (m, 2H, **H-1**), 5.58 (t, *J* = 9.6 Hz, 1H), 5.50 – 5.39 (m, 2H), 5.32 (t, *J* = 9.7 Hz, 1H), 5.09 (t, *J* = 8.5 Hz, 1H), 4.97 (d, *J* = 7.7 Hz, 1H, **H-1'''**), 4.70 – 4.61 (m, 3H, **H-1'**, **H-1''**, **H-1'''**), 4.60 – 4.52 (m, 3H), 4.52 – 4.43 (m, 4H), 4.41 – 4.36 (m, 1H), 4.35 – 4.19 (m, 5H), 4.10 (d, *J* = 11.0 Hz, 1H), 4.02 (d, *J* = 11.6 Hz, 2H), 3.96 – 3.85 (m, 3H), 3.84 – 3.68 (m, 4H), 3.7 – 3.56 (m, 5H), 3.49 (t, *J* = 9.0 Hz, 1H), 3.41 (t, *J* = 9.2 Hz, 1H), 3.29 (dd, *J* = 11.0, 3.8 Hz, 1H), 2.84 (s, 3H), 2.65 (d, *J* = 9.7 Hz, 1H). <sup>13</sup>C NMR (151 MHz, CDCl<sub>3</sub>) δ 166.25, 165.94, 165.90, 165.85, 165.45, 165.43, 165.25, 165.17, 164.97, 164.89, 138.59, 138.53, 138.17, 138.02, 133.76, 133.67, 133.54, 133.32, 133.29, 133.26, 133.21, 132.97, 132.93, 130.22, 130.09, 130.02, 130.01, 129.92, 129.88, 129.83, 129.75, 129.74, 129.71, 129.64, 129.60, 129.56, 129.19, 129.01, 128.96, 128.92, 128.88, 128.75, 128.71, 128.63, 128.59, 128.57, 128.54, 128.52, 128.50, 128.48, 128.43, 128.42, 128.29, 128.27, 128.11, 127.91, 127.88, 127.78, 127.72, 127.70, 127.68, 127.64, 127.63, 127.60, 102.09, 101.98, 101.11, 100.61, 98.91, 83.13, 80.48, 75.69, 75.01, 74.97, 74.77, 74.76, 74.57, 74.03, 74.00, 73.95, 73.02, 72.93, 72.88, 72.84, 72.28, 72.07, 72.03, 71.94, 71.36, 70.51, 70.22, 69.85, 69.68, 69.59, 67.49, 67.24, 63.28, 54.53. HRMS (ESI) calcd for C<sub>143</sub>H<sub>128</sub>O<sub>37</sub>Na<sub>2</sub> [M+2Na]<sup>2+</sup> 1241.3959, found 1241.3952.

## 2.4 One-Pot synthesis of nucleosides based on glycosyl PVB.

### 2.4.1 Preparation of new glycosyl donors and acceptors

#### 2,3-Di-*O*-benzoyl- $\beta$ -D-ribofuranoyl 2-(1-phenylvinyl) benzoate (**40**)

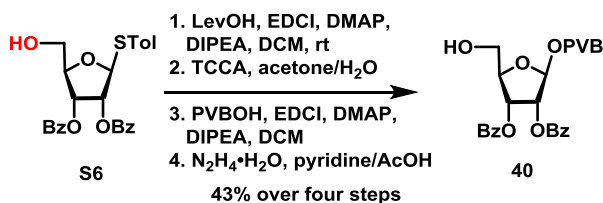

The known compound **S6**<sup>[20]</sup> (1.45 g, 3.13 mmol), EDCI (1.08 g, 5.63 mmol) and DMAP (382 mg, 3.13 mmol) were dissolved in 16 mL CH<sub>2</sub>Cl<sub>2</sub>. Then levulinic acid (0.48 mL, 4.7 mmol) and DIPEA (1.55 mL, 9.38 mmol) were added successively at room temperature under Ar. The resulting mixture was stirred for 6 h at this temperature and concentrated *in vacuo* to produce the crude oil. Then it was purified by silica gel column chromatography (EtOAc/Petroleum ether =1/4) afforded a white solid (1.76 g, 85%). The above solid (1.49 g, 2.66 mmol) was dissolved with acetone/H<sub>2</sub>O (53 mL/ 13 mL), and trichloroisocyanuric acid (618 mg, 2.66 mmol) was added at 0 °C. The mixture was stirred for 4 h at 0 °C and quenched with saturated aqueous NaHCO<sub>3</sub>, then it was diluted with EtOAc, washed with H<sub>2</sub>O and brine. The organic phase was dried by Na<sub>2</sub>SO<sub>4</sub> and concentrated *in vacuo*. The resulting residue was purified by silica gel column chromatography (EtOAc/Petroleum ether =1/2) to afford the hemiacetal as a white foam (1.21 g, 81%). The hemiacetal (984 mg, 2.15 mmol), EDCI (744 mg, 3.88 mmol) and DMAP (263 mg, 2.15 mmol) were dissolved in 10 mL CH<sub>2</sub>Cl<sub>2</sub>. Then 2-(1-Phenylvinyl) benzoic acid (531 mg, 2.37 mmol) and DIPEA (1.1 mL, 6.47 mmol) were added successively at room temperature under Ar. The resulting mixture was stirred for 5 h at this temperature and concentrated *in vacuo* to produce the crude oil. Then it was purified by silica gel column chromatography (EtOAc/Petroleum ether =1/2) to afford glycosyl PVB as a white solid (1.43 g, 96%). To a solution of this intermediate (1.38 g, 2.08 mmol) in 6 mL pyridine and 4 mL AcOH was added hydrazine hydrate (0.21 mL, 4.16 mmol) at room temperature. The mixture was stirred at room temperature for 8 h. Then it was quenched with acetone and concentrated *in vacuo*. The resulting residue was purified by silica gel column chromatography (EtOAc/Petroleum ether =1/3) to afford **40** (1.17 g, 91%) as a white foam;  $[\alpha]_D^{20} = +15.14$  (c 0.28, CHCl<sub>3</sub>); <sup>1</sup>H NMR (400 MHz, Chloroform-*d*)  $\delta$  7.98 (d, *J* = 7.7 Hz, 2H), 7.95 (d, *J* = 7.9 Hz, 1H), 7.84 (d, *J* = 7.8 Hz, 2H), 7.58 (t, *J* = 7.5 Hz, 2H), 7.49 (dd, *J* = 15.7, 7.7

Hz, 2H), 7.43 (d,  $J = 8.0$  Hz, 2H), 7.41 – 7.37 (m, 2H), 7.36 – 7.26 (m, 5H), 7.26 – 7.20 (m, 2H), 6.28 (s, 1H, **H-1**), 5.87 (s, 1H, CH<sub>2</sub>-PVB), 5.56 – 5.51 (m, 1H, H-3), 5.47 (d,  $J = 4.8$  Hz, 1H, H-2), 5.28 (s, 1H, CH<sub>2</sub>-PVB), 4.40 (dt,  $J = 7.1, 3.9$  Hz, 1H, H-4), 3.77 (dd,  $J = 12.4, 3.3$  Hz, 1H, H-5a), 3.60 (dd,  $J = 12.4, 4.5$  Hz, 1H, H-5b), 2.01 (s, 1H, OH). <sup>13</sup>C NMR (101 MHz, CDCl<sub>3</sub>)  $\delta$  165.74, 165.51, 164.86, 148.98, 143.03, 140.03, 133.58, 133.50, 132.52, 131.53, 130.54, 129.83, 129.75, 129.58, 128.99, 128.84, 128.53, 128.45, 128.41, 127.93, 127.86, 126.61, 114.29, 99.05, 83.19, 75.19, 71.00, 62.41. HRMS (ESI) calcd for C<sub>34</sub>H<sub>28</sub>O<sub>8</sub>Na [M+Na]<sup>+</sup>: 587.1676, found: 587.1673.

#### 6-O-benzyl-3-O-methyl-2-O-benzoyl-L-talofuranoyl 2-(1-phenylvinyl) benzoate (**43**)

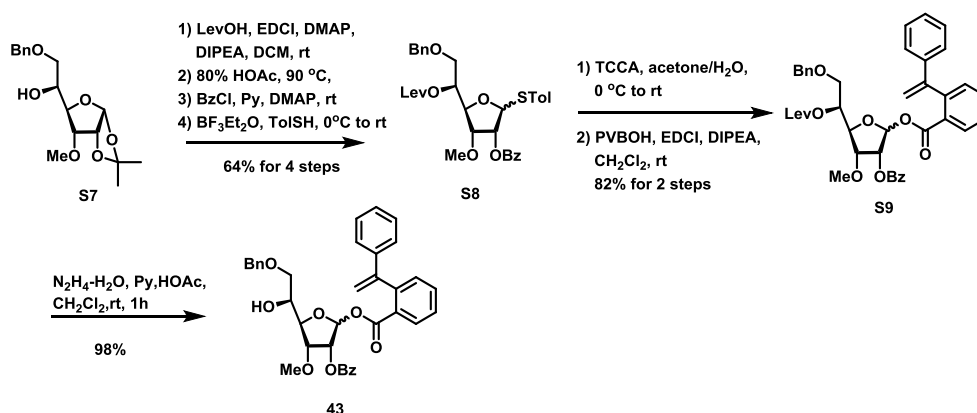

The known compound **S7**<sup>[21]</sup> (2.3 g, 5.8 mmol) was dissolved in 20 mL dry CH<sub>2</sub>Cl<sub>2</sub>, then DMAP (354 mg, 2.9 mmol), EDCI (2 g, 10.44 mmol), DIPEA (2.8 mL, 17.4 mmol) and levulinic acid (0.89 mL, 8.7 mmol) were added successively at room temperature under Ar. The mixture was stirred at room temperature overnight. Then it was quenched with H<sub>2</sub>O, extracted with CH<sub>2</sub>Cl<sub>2</sub>, and washed with brine. The organic phase was dried by Na<sub>2</sub>SO<sub>4</sub> and concentrated *in vacuo*. The resulting residue was purified by silica gel column chromatography (EtOAc/Petroleum ether =1/1.5) afforded a light yellow solid (2.25 g, 92%). The above solid (2.25 g, 5.33 mmol) was dissolved in 32 mL AcOH and 8 mL H<sub>2</sub>O, this solution was stirred at 90 °C for 6 h, then the mixture was concentrated *in vacuo* to give the crude light yellow oil. To a solution of the crude in 20 mL pyridine was added 4-dimethylamino-pyridine (195 mg, 1.59 mmol) and benzoyl chloride (1.55 mL, 13.25 mmol) at 0 °C under Ar. The mixture was stirred at room temperature overnight and diluted with CH<sub>2</sub>Cl<sub>2</sub>, washed with 1 N HCl and brine. The organic phase was dried by Na<sub>2</sub>SO<sub>4</sub> and concentrated *in vacuo*. The resulting residue was purified by silica gel column chromatography (EtOAc/Petroleum ether =1/2) afforded a light yellow oil (2.7 g, 86%). To a

---

solution of the above yellow oil (2.7 g, 4.57 mmol) and *p*-toluenethiol (680 mg, 5.48 mmol) was slowly added BF<sub>3</sub>Et<sub>2</sub>O (0.846 mL, 6.85 mmol) at 0 °C under Ar. The mixture was stirred at room temperature for 2 h, then it was quenched with saturated aqueous NaHCO<sub>3</sub>, extracted with CH<sub>2</sub>Cl<sub>2</sub>, and washed with brine. The organic phase was dried by Na<sub>2</sub>SO<sub>4</sub> and concentrated *in vacuo*. The resulting residue was purified by silica gel column chromatography (EtOAc/Petroleum ether =1/2.7) afforded **S8** as a light yellow oil (2.19 g, 81%,  $\alpha/\beta$  = 1/2).

The  $\beta$ -anomer:  $R_f$  = 0.45 (EtOAc/Petroleum ether =1/2.5), the  $\alpha$ -anomer:  $R_f$  = 0.41 (EtOAc/Petroleum ether =1/2.5). Data for the  $\beta$ -anomer:  $[\alpha]_D^{20}$  = -89.46 (c 0.13, CHCl<sub>3</sub>); <sup>1</sup>H NMR (400 MHz, CDCl<sub>3</sub>)  $\delta$  8.05 (d,  $J$  = 7.5 Hz, 2H), 7.57 (t,  $J$  = 7.4 Hz, 1H), 7.48 – 7.41 (m, 4H), 7.38 – 7.28 (m, 5H), 7.11 (d,  $J$  = 7.8 Hz, 2H), 5.55 – 5.48 (m, 1H, H-2), 5.43 (d,  $J$  = 2.7 Hz, 1H, **H-1**), 5.33 (dd,  $J$  = 6.1, 3.0 Hz, 1H, H-5), 4.56 (dd,  $J$  = 12.0, 2.9 Hz, 2H, CH<sub>2</sub>-Bn), 4.27 (dd,  $J$  = 7.2, 3.0 Hz, 1H, H-4), 3.99 (dd,  $J$  = 7.2, 4.6 Hz, 1H, H-3), 3.69 (d,  $J$  = 6.2 Hz, 2H, H-6a and H-6b), 3.34 (s, 3H, OMe), 2.86 – 2.78 (m, 2H, CH<sub>2</sub>-Lev), 2.71 – 2.56 (m, 2H, CH<sub>2</sub>-Lev), 2.33 (s, 3H, CH<sub>3</sub>-Lev), 2.18 (s, 3H, CH<sub>3</sub>-STol). <sup>13</sup>C NMR (100 MHz, CDCl<sub>3</sub>)  $\delta$  206.41, 172.31, 165.43, 138.40, 137.95, 133.78, 133.38, 129.89, 129.81, 129.42, 128.64, 128.46, 128.39, 127.69, 127.67, 89.13, 80.57, 79.39, 73.15, 70.71, 68.57, 59.06, 38.03, 29.85, 28.20, 21.18. HRMS (ESI) calcd for C<sub>33</sub>H<sub>36</sub>O<sub>8</sub>SNa [M+Na]<sup>+</sup>: 615.2023, found: 615.2020.

To a solution of compound **S8** (816 mg, 1.37 mmol) in acetone (30 mL) and H<sub>2</sub>O (7.5 mL) was added trichloroisocyanuric acid (317 mg, 1.37 mmol) at 0 °C. The mixture was kept stirring at 0 °C for 3 h, then it was quenched with saturated aqueous NaHCO<sub>3</sub>, extracted with EtOAc, and washed with H<sub>2</sub>O. The organic phase was dried by Na<sub>2</sub>SO<sub>4</sub> and concentrated *in vacuo*. The resulting residue was purified by silica gel column chromatography (EtOAc/Petroleum ether =1/2) afforded a colorless syrup (582 mg, 87%). The above syrup (582 mg, 1.20 mmol) was dissolved in 12 mL CH<sub>2</sub>Cl<sub>2</sub>, then DMAP (143 mg, 1.20 mmol), EDCI (412 mg, 2.15 mmol), DIPEA (0.59 mL, 3.60 mmol) and 2-(1-Phenylvinyl) benzoic acid (323 mg, 1.32 mmol) were successively added at room temperature under Ar. The mixture was stirred at room temperature for 1 h. Then it was quenched with H<sub>2</sub>O, extracted with CH<sub>2</sub>Cl<sub>2</sub>, and washed with brine. The organic phase was dried by Na<sub>2</sub>SO<sub>4</sub> and concentrated *in vacuo*. The resulting residue was purified by silica gel column chromatography (EtOAc/Petroleum ether =1/1.8) afforded **S9** (775 mg, 94%,  $\alpha/\beta$  = 1/2) as a white

solid. The  $\beta$ -anomer:  $R_f = 0.35$  (EtOAc/Petroleum ether =1/2), the  $\alpha$ -anomer:  $R_f = 0.31$  (EtOAc/Petroleum ether =1/2). Data for the  $\beta$ -anomer:  $[\alpha]_D^{20} = -6.24$  (c 0.23, CHCl<sub>3</sub>), <sup>1</sup>H NMR (400 MHz, CDCl<sub>3</sub>)  $\delta$  8.03 (d,  $J = 7.5$  Hz, 2H), 7.93 (d,  $J = 7.6$  Hz, 1H), 7.59 – 7.50 (m, 2H), 7.49 – 7.38 (m, 3H), 7.37 – 7.17 (m, 11H), 6.10 (s, 1H, CH<sub>2</sub>-PVB), 5.82 (s, 1H, CH<sub>2</sub>-PVB), 5.23 (d,  $J = 4.4$  Hz, 1H, H-2), 5.23 (s, 1H, **H-1**), 5.17 (q,  $J = 5.2$  Hz, 1H, H-5), 4.52 (d,  $J = 12.0$  Hz, 1H, CH<sub>2</sub>-Bn), 4.48 (d,  $J = 12.0$  Hz, 1H, CH<sub>2</sub>-Bn), 4.20 (dd,  $J = 8.3, 4.7$  Hz, 1H, H-4), 3.67 (dd,  $J = 8.3, 4.4$  Hz, 1H, H-3), 3.58 – 3.48 (m, 2H, H-6), 3.17 (s, 3H, OMe), 2.74 – 2.56 (m, 2H, CH<sub>2</sub>-Lev), 2.41 – 2.37 (m, 2H, CH<sub>2</sub>-Lev), 2.14 (s, 3H, CH<sub>3</sub>-Lev). <sup>13</sup>C NMR (100 MHz, CDCl<sub>3</sub>)  $\delta$  206.24, 172.18, 165.72, 165.07, 148.74, 142.75, 140.09, 137.89, 133.42, 131.98, 131.08, 130.48, 130.30, 129.90, 129.25, 128.47, 128.42, 128.37, 127.91, 127.71, 127.68, 127.60, 126.78, 114.45, 98.66, 80.26, 79.05, 73.21, 73.04, 71.59, 68.55, 59.09, 37.92, 29.81, 27.87. HRMS (ESI) calcd for C<sub>41</sub>H<sub>40</sub>O<sub>10</sub>Na [M+Na]<sup>+</sup>: 715.2514, found: 715.2515.

To a solution of compound **S9** (750 mg, 1.08 mmol) in 17 mL dry CH<sub>2</sub>Cl<sub>2</sub> was added 1 M hydrazine hydrate (2.16 mL, 2.16 mmol, hydrazine hydrate/pyridine/AcOH = 125  $\mu$ L/1.4 mL/1 mL) at room temperature. The mixture was stirred at room temperature for 1 h. Then it was quenched with acetone and concentrated *in vacuo*. The resulting residue was purified by silica gel column chromatography (EtOAc/Petroleum ether =1/2) afforded **43** (636 mg, 98%,  $\alpha/\beta = 1/2$ ) as a syrup. The  $\beta$ -anomer:  $R_f = 0.36$  (EtOAc/Petroleum ether =1/2), the  $\alpha$ -anomer:  $R_f = 0.31$  (EtOAc/Petroleum ether =1/2). Data for the  $\beta$ -anomer:  $[\alpha]_D^{20} = -9.77$  (c 0.18, CHCl<sub>3</sub>), <sup>1</sup>H NMR (400 MHz, CDCl<sub>3</sub>)  $\delta$  8.02 (d,  $J = 7.7$  Hz, 2H), 7.89 (d,  $J = 7.7$  Hz, 1H), 7.62 – 7.49 (m, 2H), 7.49 – 7.39 (m, 3H), 7.39 – 7.20 (m, 11H), 6.18 (s, 1H, CH<sub>2</sub>-PVB), 5.82 (s, 1H, CH<sub>2</sub>-PVB), 5.25 (d,  $J = 4.3$  Hz, 1H, H-2), 5.22 (s, 1H, **H-1**), 4.57 (d,  $J = 12.0$  Hz, 1H, CH<sub>2</sub>-Bn), 4.52 (d,  $J = 12.0$  Hz, 1H, CH<sub>2</sub>-Bn), 4.08 (dd,  $J = 8.3, 3.7$  Hz, 1H, H-4), 3.82 – 3.73 (m, 2H, H-3, H-5), 3.45 (d, 2H, H-6a and H-6b), 3.17 (s, 3H, OMe), 2.13 (d,  $J = 7.1$  Hz, 1H, OH). <sup>13</sup>C NMR (100 MHz, CDCl<sub>3</sub>)  $\delta$  165.85, 165.10, 148.84, 142.77, 139.99, 137.91, 133.43, 132.19, 131.15, 130.33, 130.16, 129.90, 129.25, 128.48, 128.44, 128.00, 127.83, 127.79, 127.77, 126.85, 114.35, 99.18, 82.16, 78.67, 73.45, 73.21, 71.19, 70.05, 59.00. HRMS (ESI) calcd for C<sub>36</sub>H<sub>34</sub>O<sub>8</sub>Na [M+Na]<sup>+</sup>: 617.2146, found: 617.2147.

## 2.4.2 One-pot glycosylation for the synthesis of nucleosides

(2-O-benzoyl-3,4,6-tri-benzyl- $\beta$ -glucopyranosyl)-(1 $\rightarrow$ 5)-(2,3-di-O-benzoyl- $\beta$ -D-ribofuranoyl) uracil (**50**)

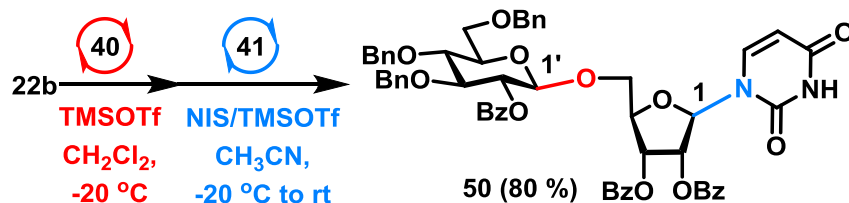

Bis(trimethylsilyl) trifluoroacetamide (BSTFA) (48  $\mu$ L, 0.182 mmol) was added to a stirred suspension of acceptor **41** (11 mg, 0.091 mmol) in dry CH<sub>3</sub>CN (1.0 mL) under Ar. The mixture was stirred at 50 °C for 30 min.

Glucosyl trichloroacetimidate **22b**<sup>[22]</sup> (38 mg, 0.055 mmol) and acceptor **40** (26 mg, 0.045 mmol) were co-evaporated with dry toluene, dried *in vacuo* for 10 min, and dissolved in dry CH<sub>2</sub>Cl<sub>2</sub> (1.0 mL) in the presence of 3 Å powdered molecular sieves (200 mg) under Ar. After stirring at room temperature for 0.5 h, then cooled to -20 °C and TMSOTf (0.1 mL, 16  $\mu$ L in 1 mL CH<sub>2</sub>Cl<sub>2</sub>, 0.009 mmol) was added. The resulting solution was kept stirring at -20 °C for 30 min, then the reaction mixture was warmed to 0 °C, to which was added the above fresh prepared uracil solution and stirred at 0 °C for another 10 min. Then NIS (16 mg, 0.068 mmol) and TMSOTf (0.1 mL, 32  $\mu$ L in 1 mL CH<sub>2</sub>Cl<sub>2</sub>, 0.018 mmol) were added, the reaction mixture was stirred for 4 h after the temperature gradually rise to room temperature. Et<sub>3</sub>N was added to quench the reaction. The whole mixture was filtered through a Celite pad and concentrated *in vacuo*. Purification by silica gel column chromatography (EtOAc/Petroleum ether =1/1) afforded **50** (36 mg, 80%) as a white solid;  $[\alpha]_D^{23} = -49.24$  (c 0.21, CHCl<sub>3</sub>); <sup>1</sup>H NMR (400 MHz, Chloroform-*d*)  $\delta$  8.43 (s, 1H, H-NH), 7.92 (d, *J* = 7.6 Hz, 2H), 7.86 – 7.76 (m, 5H), 7.46 (d, *J* = 6.4 Hz, 2H), 7.38 (t, *J* = 7.5 Hz, 1H), 7.31 – 7.20 (m, 13H), 7.18 (s, 1H), 7.14 – 7.10 (m, 2H), 7.06 (s, 4H), 6.42 (d, *J* = 7.0 Hz, 1H, **H-1**), 5.78 (d, *J* = 7.2 Hz, 1H, H-pyrimidine), 5.54 – 5.48 (m, 1H, H-3), 5.32 – 5.24 (m, 2H, H-2 and H-2'), 4.77 (d, *J* = 10.8 Hz, 1H, H-Bn), 4.70 (d, *J* = 10.8 Hz, 1H, H-Bn), 4.67 – 4.61 (m, 2H, **H-1'**, H-Bn), 4.60 – 4.45 (m, 4H), 4.33 (s, 1H, H-4), 4.26 (d, *J* = 10.1 Hz, 1H, H-5a), 3.84 (t, *J* = 9.0 Hz, 1H, H-3'), 3.80 – 3.65 (m, 5H), 3.55 (d, *J* = 7.9



Hz, 1H).  $^{13}\text{C}$  NMR (101 MHz,  $\text{CDCl}_3$ )  $\delta$  165.50, 165.41, 164.57, 162.75, 150.50, 140.13, 137.83, 137.81, 137.63, 133.61, 133.45, 133.26, 129.97, 129.89, 129.73, 129.34, 128.87, 128.62, 128.50, 128.48, 128.46, 128.38, 128.31, 128.03, 127.96, 127.94, 127.83, 127.77, 127.74, 103.57, 100.77, 86.01, 82.58, 82.47, 77.82, 75.40, 75.28, 75.17, 74.08, 73.75, 73.52, 72.37, 68.44, 67.86. HRMS (ESI) calcd for  $\text{C}_{57}\text{H}_{52}\text{N}_2\text{O}_{14}$   $[\text{M}-\text{H}]^-$  987.3346, found 987.3340.

**[6-*O*-(*tert*-butyldiphenylsilyl)-2,3,4-tri-acetyl- $\alpha$ -D-mannopyranosyl]-(1 $\rightarrow$ 5)-(6-*O*-benzyl-3-*O*-methyl-2-*O*-benzoyl- $\beta$ -L-talofuranoyl) 5-fluorouracil (**51**)**

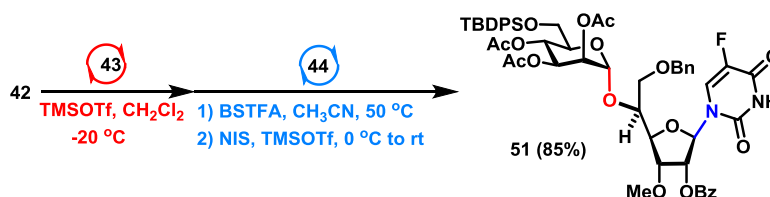

Bis(trimethylsilyl) trifluoroacetamide (BSTFA) (98  $\mu\text{L}$ , 0.372 mmol) was added to a stirred suspension of acceptor **44** (16 mg, 0.124 mmol) in dry  $\text{CH}_3\text{CN}$  (1.2 mL) under Ar. The mixture was stirred at 50  $^\circ\text{C}$  for 30 min.

Mannosyl trichloroacetimidate **42**<sup>[23]</sup> (51 mg, 0.075 mmol) and glycosyl PVB acceptor **43** (37 mg, 0.062 mmol) were co-evaporated with dry toluene, dried *in vacuo* for 10 min, and dissolved in dry  $\text{CH}_2\text{Cl}_2$  (1.2 mL) in the presence of 3 Å powdered molecular sieves (240 mg) under Ar. After stirring at room temperature for 0.5 h, then cooled to -20  $^\circ\text{C}$  and TMSOTf (2.2  $\mu\text{L}$ , 0.012 mmol) was added. The resulting solution was kept stirring at -20  $^\circ\text{C}$  for 30 min, then the reaction mixture was warmed to 0  $^\circ\text{C}$ , to which was added the above fresh prepared uracil solution and stirred at 0  $^\circ\text{C}$  for another 10 min. Then NIS (21 mg, 0.093 mmol) and TMSOTf (4  $\mu\text{L}$ , 0.022 mmol) were added, the reaction mixture was stirred for 3 h after the temperature gradually rise to room temperature.  $\text{Et}_3\text{N}$  was added to quench the reaction. The whole mixture was filtered through a Celite pad and concentrated *in vacuo*. Purification by silica gel column chromatography ( $\text{EtOAc}$ /Petroleum ether = 1/1) afforded **51** (55 mg, 85%) as a white foam.  $R_f$  = 0.24 ( $\text{EtOAc}$ /Petroleum ether = 1/1);  $[\alpha]_{\text{D}}^{20}$  = +19.69 (c 0.15,  $\text{CHCl}_3$ ),  $^1\text{H}$  NMR (400 MHz,  $\text{CDCl}_3$ )  $\delta$  9.04 (d,  $J$  = 4.6 Hz, 1H, NH), 8.03 (d,  $J$  = 7.8 Hz, 2H), 7.79 – 7.63 (m, 5H), 7.58 (t,  $J$  = 7.3 Hz, 1H), 7.50 – 7.28 (m, 13H), 6.10 (d,  $J$  = 4.2 Hz, 1H, H-1), 5.59 – 5.47 (m, 2H, H-2, H-4'), 5.40 (dd,  $J$  = 9.8, 2.9 Hz, 1H,

H-3'), 5.33 (d,  $J = 3.5$  Hz, 2H, H-1' and H-2'), 4.60 (q,  $J = 11.9$  Hz, 2H, CH<sub>2</sub>-Bn), 4.30 (dd,  $J = 5.6, 2.3$  Hz, 1H, H-4), 4.20 (d,  $J = 6.3$  Hz, 1H, H-5), 4.13 (t,  $J = 5.3$  Hz, 1H, H-3), 4.00 (d,  $J = 9.3$  Hz, 1H, H-5'), 3.86 – 3.72 (m, 4H, H-6 and H-6'), 3.22 (s, 3H, OMe), 2.14 (s, 3H, CH<sub>3</sub>-OAc), 2.00 (s, 3H, CH<sub>3</sub>-OAc), 1.96 (s, 3H, CH<sub>3</sub>-OAc), 1.07 (s, 9H, CH<sub>3</sub>-TBDPS). <sup>13</sup>C NMR (100 MHz, CDCl<sub>3</sub>)  $\delta$  170.09, 169.99, 169.54, 165.21, 156.72, 156.45, 148.60, 141.87, 139.50, 137.47, 135.73, 135.63, 133.60, 133.21, 133.11, 129.96, 129.73, 129.68, 128.90, 128.56, 128.52, 127.92, 127.83, 127.69, 127.61, 123.86, 123.52, 96.58, 87.89, 82.35, 78.18, 74.25, 73.78, 73.64, 72.65, 69.86, 69.61, 69.16, 65.75, 62.36, 58.83, 26.73, 20.86, 20.70, 20.65, 19.34. HRMS (ESI) calcd for C<sub>53</sub>H<sub>59</sub>N<sub>2</sub>O<sub>16</sub>FSiNa [M+Na]<sup>+</sup>: 1049.3510, found: 1049.3512.

[6-*O*-(*tert*-butyldiphenylsilyl)-2,3,4-tri-acetyl- $\alpha$ -D-mannopyranosyl] -(1 $\rightarrow$ 5)-  
 (6-*O*-benzyl-3-*O*-methyl-2-*O*-benzoyl- $\beta$ -L-talofuranoyl) trifluorothymine (**52**)

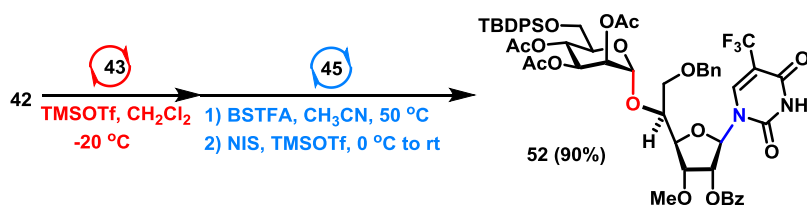

For donor **42**<sup>[23]</sup> (51 mg, 0.075 mmol), glycosyl PVB acceptor **43** (37 mg, 0.062 mmol) and trifluorothymine **45** (22 mg, 0.123 mmol) as described for the preparation of **51** to give **52** (60 mg, 90%) as a white solid.  $R_f = 0.21$  (EtOAc/Petroleum ether = 1/1.5).  $[\alpha]_D^{20} = +2.28$  (c 0.12, CHCl<sub>3</sub>), <sup>1</sup>H NMR (400 MHz, CDCl<sub>3</sub>)  $\delta$  8.92 (s, 1H, NH), 8.03 (d,  $J = 7.0$  Hz, 3H), 7.69 (d,  $J = 8.0$  Hz, 4H), 7.58 (t,  $J = 7.3$  Hz, 1H), 7.48 – 7.41 (m, 3H), 7.40 – 7.32 (m, 10H), 6.12 (d,  $J = 5.0$  Hz, 1H, **H-1**), 5.56 – 5.49 (m, 2H, H-2 and H-4'), 5.45 (dd,  $J = 10.1, 2.9$  Hz, 1H, H-3'), 5.34 (s, 1H, **H-1'**), 5.24 (s, 1H, H-2'), 4.61 (d,  $J = 12.0$  Hz, 1H, CH<sub>2</sub>-Bn), 4.57 (d,  $J = 12.0$  Hz, 1H, CH<sub>2</sub>-Bn), 4.37 (s, 1H, H-4), 4.30 – 4.18 (m, 2H, H-3, H-5), 4.03 (d,  $J = 8.5$  Hz, 1H, H-5'), 3.84 – 3.73 (m, 4H, H-6' and H-6), 3.23 (s, 3H, OMe), 2.14 (s, 3H, CH<sub>3</sub>-OAc), 1.97 (s, 3H, CH<sub>3</sub>-OAc), 1.96 (s, 3H, CH<sub>3</sub>-OAc), 1.07 (s, 9H, CH<sub>3</sub>-TBDPS). <sup>13</sup>C NMR (100 MHz, CDCl<sub>3</sub>)  $\delta$  170.21, 169.94, 169.61, 165.31, 158.05, 149.00, 140.85, 137.45, 135.71, 135.63, 133.65, 133.21, 129.94, 129.73, 129.67, 128.83, 128.59, 128.52, 127.91, 127.80, 127.70, 127.60, 106.08, 105.75, 96.00, 88.52, 82.88, 78.53, 74.87, 73.66, 73.09, 72.82, 69.96,

69.16, 68.91, 65.74, 62.48, 58.70, 26.74, 20.85, 20.65, 20.56, 19.34. HRMS (ESI) calcd for  $C_{54}H_{59}N_2O_{16}F_3SiNa$   $[M+Na]^+$ : 1099.3478, found: 1099.3477.

**[6-*O*-(*tert*-butyldiphenylsilyl)-2,3,4-tri-acetyl- $\alpha$ -D-mannopyranosyl] -(1 $\rightarrow$ 5)-  
**(6-*O*-benzyl-3-*O*-methyl-2-*O*-benzoyl- $\beta$ -L-talofuranoyl) 4-*N*-benzoylcytosine (**53**)****

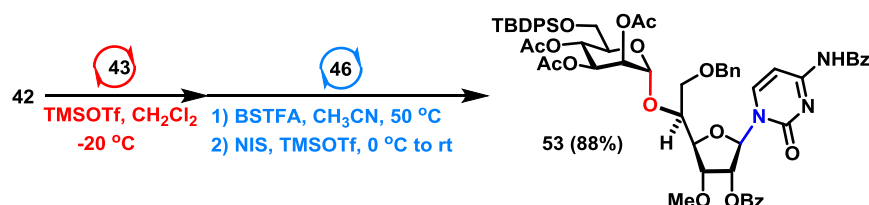

For donor **42**<sup>[23]</sup> (51 mg, 0.075 mmol), glycosyl PVB acceptor **43** (37 mg, 0.062mmol) and *N*<sup>4</sup>-benzoylcytosine **46** (27 mg, 0.123 mmol) as described for the preparation of **51** to give **53** (61 mg, 88%) as a white solid.  $R_f$  = 0.18 (EtOAc/Petroleum ether = 1/1).  $[\alpha]_D^{20}$  = +37.57 (c 0.14,  $CHCl_3$ ),  $^1H$  NMR (400 MHz,  $CDCl_3$ )  $\delta$  8.73 (s, 1H, NH), 8.20 (d,  $J$  = 7.5 Hz, 1H), 8.05 (d,  $J$  = 7.7 Hz, 2H), 7.89 (d,  $J$  = 7.6 Hz, 2H), 7.73 – 7.55 (m, 7H), 7.55 – 7.28 (m, 15H), 6.24 (d,  $J$  = 2.6 Hz, 1H, **H-1**), 5.73 – 5.59 (m, 2H, H-4' and H-2), 5.47 - 5.43 (m, 1H, H-2'), 5.40 – 5.30 (m, 2H, **H-1'** and H-3'), 4.65 (d,  $J$  = 11.9 Hz, 1H,  $CH_2$ -Bn), 4.56 (d,  $J$  = 11.9 Hz, 1H,  $CH_2$ -Bn), 4.29 (dd,  $J$  = 7.3, 2.3 Hz, 1H, H-4), 4.22 – 4.16 (m, 1H, H-5), 3.99 – 3.90 (m, 2H, H-3 and H-5'), 3.88 – 3.68 (m, 4H, H-6 and H-6'), 3.18 (s, 3H, OMe), 2.14 (s, 3H,  $CH_3$ -OAc), 2.06 (s, 3H,  $CH_3$ -OAc), 1.97 (s, 3H,  $CH_3$ -OAc), 1.06 (s, 9H,  $CH_3$ -TBDPS).  $^{13}C$  NMR (100 MHz,  $CDCl_3$ )  $\delta$  170.27, 169.98, 169.47, 164.95, 137.57, 135.76, 135.61, 133.42, 133.26, 133.12, 133.01, 129.98, 129.69, 129.66, 129.16, 129.00, 128.50, 128.45, 127.86, 127.64, 127.57, 97.81, 89.01, 81.81, 77.90, 75.17, 74.23, 73.65, 72.42, 70.65, 69.73, 69.61, 65.43, 62.08, 59.07, 26.70, 20.87, 20.81, 20.66, 19.34. HRMS (ESI) calcd for  $C_{60}H_{65}N_3O_{16}SiNa$   $[M+Na]^+$ : 1134.4026, found: 1134.4029.

**[6-*O*-(*tert*-butyldiphenylsilyl)-2,3,4-tri-acetyl- $\alpha$ -D-mannopyranosyl] -(1 $\rightarrow$ 5)-  
**(6-*O*-benzyl-3-*O*-methyl-2-*O*-benzoyl- $\beta$ -L-talofuranoyl) 5-fluoro-4-*N*-pentyl-carbamate  
**cytosine (**54**)******

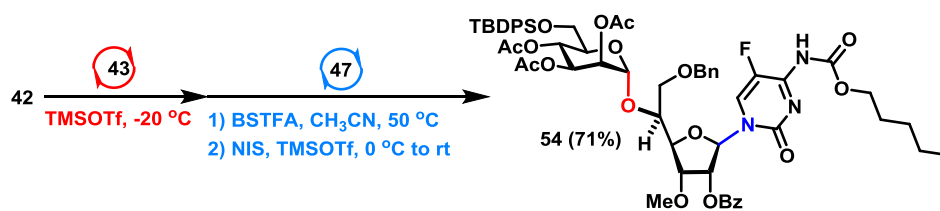

For donor **42**<sup>[23]</sup> (51 mg, 0.075 mmol), glycosyl PVB acceptor **43** (37 mg, 0.062 mmol) and 5-fluorocytosine **47** (31 mg, 0.123 mmol) as described for the preparation of **51** to give **54** (50 mg, 71%) as a white solid.  $R_f = 0.18$  (EtOAc/Petroleum ether = 1/1).  $[\alpha]_D^{20} = +51.86$  (c 0.13, CHCl<sub>3</sub>), <sup>1</sup>H NMR (400 MHz, CDCl<sub>3</sub>)  $\delta$  12.02 (s, 1H, NH), 8.04 (d,  $J = 7.7$  Hz, 2H), 7.79 (s, 1H), 7.71 – 7.63 (m, 4H), 7.59 (t,  $J = 7.3$  Hz, 1H), 7.48 – 7.42 (m, 2H), 7.41 – 7.30 (m, 11H), 6.16 (d,  $J = 4.1$  Hz, 1H, **H-1**), 5.54 (t,  $J = 9.7$  Hz, 1H, H-4'), 5.45 (s, 1H, H-2), 5.42 – 5.28 (m, 3H, **H-1'**, H-2' and H-3'), 4.63 (d,  $J = 12.0$  Hz, 1H, CH<sub>2</sub>-Bn), 4.57 (d,  $J = 12.0$  Hz, 1H, CH<sub>2</sub>-Bn), 4.32 (dd,  $J = 5.7, 2.3$  Hz, 1H, H-4), 4.25 – 4.13 (m, 3H, H-5, CH<sub>2</sub>-pentyl), 4.09 (s, 1H, H-3), 3.99 (s, 1H, H-5'), 3.86 – 3.71 (m, 4H, H-6 and H-6'), 3.23 (s, 3H, OMe), 2.13 (s, 3H, CH<sub>3</sub>-OAc), 1.98 (s, 3H, CH<sub>3</sub>-OAc), 1.96 (s, 3H, CH<sub>3</sub>-OAc), 1.78 – 1.67 (m, 2H, CH<sub>2</sub>-pentyl), 1.42 – 1.29 (m, 4H, CH<sub>2</sub>-pentyl), 1.07 (s, 9H, CH<sub>3</sub>-TBDPS), 0.90 (t,  $J = 6.8$  Hz, 3H, CH<sub>3</sub>-pentyl). <sup>13</sup>C NMR (100 MHz, CDCl<sub>3</sub>)  $\delta$  169.89, 169.47, 146.21, 137.44, 135.71, 135.62, 133.58, 133.21, 133.10, 129.97, 129.72, 129.68, 128.52, 127.92, 127.82, 127.68, 127.59, 96.67, 87.58, 82.45, 78.18, 74.26, 73.65, 72.73, 69.75, 69.48, 69.12, 66.56, 65.70, 62.39, 58.85, 28.28, 27.95, 26.72, 22.33, 20.83, 20.69, 20.63, 19.34, 13.95. HRMS (ESI) calcd for C<sub>59</sub>H<sub>70</sub>N<sub>3</sub>O<sub>17</sub>FSiNa [M+Na]<sup>+</sup>: 1162.4351, found: 1162.4350.

[6-*O*-(*tert*-butyldiphenylsilyl)-2,3,4-tri-acetyl- $\alpha$ -D-mannopyranosyl] -(1→5)-

(6-*O*-benzyl-3-*O*-methyl-2-*O*-benzoyl- $\beta$ -L-talofuranoyl)

6-*N*-di-*tert*-butyl-carbamate-purine (55)

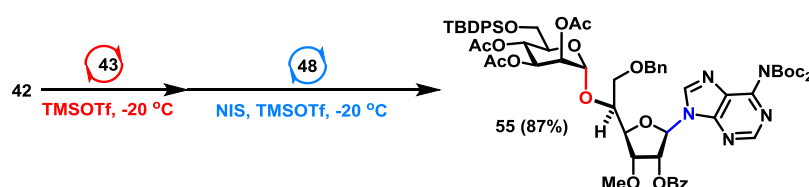

Mannosyl trichloroacetimidate **42**<sup>[23]</sup> (51 mg, 0.075 mmol) and glycosyl PVB acceptor **43** (37 mg, 0.062 mmol) were co-evaporated with dry toluene, dried *in vacuo* for 10 min, and dissolved in dry CH<sub>2</sub>Cl<sub>2</sub> (1.2 mL) in the presence of 3 Å powdered molecular sieves

(220 mg) under Ar. After stirring at room temperature for 0.5 h, then cooled to -20 °C and TMSOTf (2.2 µL, 0.012 mmol) was added. The resulting solution was kept stirring at -20 °C for 30 min, to which was added the fresh prepared purine solution **48** (21 mg in 1 mL dry CH<sub>2</sub>Cl<sub>2</sub>) and stirred at -20 °C for another 10 min. And then NIS (21 mg, 0.093 mmol) and TMSOTf (2.2 µL, 0.012 mmol) were added, the reaction mixture was stirred for 3 h at -20 °C. Et<sub>3</sub>N was added to quench the reaction. The whole mixture was filtered through a Celite pad and concentrated *in vacuo*. Purification by silica gel column chromatography (EtOAc/Petroleum ether =1/2) afforded **55** (66 mg, 87%) as a colorless syrup. *R<sub>f</sub>* = 0.25 (EtOAc/Petroleum ether =1/2). [α]<sub>D</sub><sup>20</sup> = +4.48 (c 0.12, CHCl<sub>3</sub>), <sup>1</sup>H NMR (400 MHz, CDCl<sub>3</sub>) δ 8.84 (s, 1H), 8.36 (s, 1H), 7.99 (d, *J* = 7.5 Hz, 2H), 7.71 (d, *J* = 6.7 Hz, 2H), 7.67 (d, *J* = 6.7 Hz, 2H), 7.57 (t, *J* = 7.4 Hz, 1H), 7.45 – 7.30 (m, 13H), 6.44 (d, *J* = 5.7 Hz, 1H, **H-1**), 5.85 (t, *J* = 5.2 Hz, 1H, H-2), 5.55 (t, *J* = 9.7 Hz, 1H, H-4'), 5.42 – 5.35 (m, 2H, H-3' and H-2'), 5.29 (s, 1H, **H-1'**), 4.61 (d, *J* = 11.9 Hz, 1H, CH<sub>2</sub>-Bn), 4.54 (d, *J* = 11.9 Hz, 1H, CH<sub>2</sub>-Bn), 4.44 – 4.36 (m, 2H, H-3 and H-4), 4.21 (t, *J* = 4.0 Hz, 1H, H-5), 4.12 (d, *J* = 9.6 Hz, 1H, H-5'), 3.87 – 3.72 (m, 4H, H-6 and H-6'), 3.29 (s, 3H, OMe), 2.12 (s, 3H, CH<sub>3</sub>-OAc), 2.00 (s, 3H, CH<sub>3</sub>-OAc), 1.96 (s, 3H, CH<sub>3</sub>-OAc), 1.45 (s, 18H, CH<sub>3</sub>-Boc), 1.07 (s, 9H, CH<sub>3</sub>-TBDPS). <sup>13</sup>C NMR (100 MHz, CDCl<sub>3</sub>) δ 169.96, 169.95, 169.50, 165.23, 153.16, 152.37, 150.51, 142.87, 137.58, 135.76, 135.65, 133.59, 133.34, 133.23, 129.88, 129.67, 129.63, 129.10, 128.81, 128.49, 127.85, 127.66, 127.58, 96.78, 85.54, 83.79, 82.60, 78.52, 74.74, 73.65, 72.40, 69.79, 69.57, 69.27, 65.66, 62.46, 58.74, 27.80, 26.75, 20.86, 20.74, 20.71, 19.36. HRMS (ESI) calcd for C<sub>64</sub>H<sub>77</sub>N<sub>5</sub>O<sub>18</sub>SiNa [M+Na]<sup>+</sup>: 1254.4925, found: 1254.4921.

**[6-*O*-(*tert*-butyldiphenylsilyl)-2,3,4-tri-acetyl- $\alpha$ -D-mannopyranosyl]-(1→5)-  
 (6-*O*-benzyl-3-*O*-methyl-2-*O*-benzoyl- $\beta$ -L-talofuranoyl)  
 6-iodine-2-*N*-*tert*-butyl-carbamate-purine (**56**)**

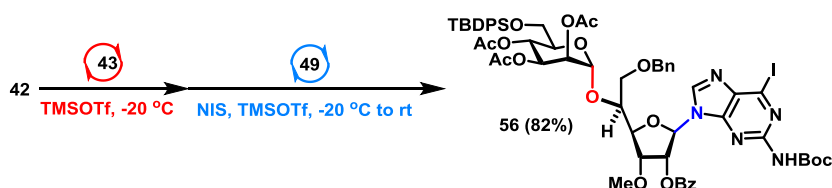

Mannosyl trichloroacetimidate **42**<sup>[23]</sup> (51 mg, 0.075 mmol) and glycosyl PVB acceptor **43** (37 mg, 0.062 mmol) were co-evaporated with dry toluene, dried *in vacuo* for 10 min, and dissolved in dry CH<sub>2</sub>Cl<sub>2</sub> (1.2 mL) in the presence of 3 Å powdered molecular sieves (220 mg) under Ar. After stirring at room temperature for 0.5 h, then cooled to - 20 °C and TMSOTf (2.2 µL, 0.012 mmol) was added. The resulting solution was kept stirring at - 20 °C for 30 min, to which was added the fresh prepared purine solution **49** (22 mg in 1 mL dry CH<sub>2</sub>Cl<sub>2</sub>) and stirred at - 20 °C for another 10 min. And then NIS (21 mg, 0.093 mmol) and TMSOTf (2.2 µL, 0.012 mmol) were added, the reaction mixture was stirred for 3h after the temperature gradually rise to room temperature. Et<sub>3</sub>N was added to quench the reaction. The whole mixture was filtered through a Celite pad and concentrated *in vacuo*. Purification by silica gel column chromatography (EtOAc/Petroleum ether =1/2) afforded **56** (64 mg, 82%) as a white solid. *R*<sub>f</sub> = 0.28 (EtOAc/Petroleum ether =1/2). [α]<sub>D</sub><sup>20</sup> = +13.61 (c 0.15, CHCl<sub>3</sub>), <sup>1</sup>H NMR (400 MHz, CDCl<sub>3</sub>) δ 8.09 – 8.03 (m, 3H), 7.67 (d, *J* = 7.1 Hz, 2H), 7.62 (d, *J* = 6.9 Hz, 2H), 7.57 (d, *J* = 7.4 Hz, 1H), 7.46 – 7.28 (m, 14H), 6.11 (d, *J* = 3.1 Hz, 1H, **H-1**), 5.87 (dd, *J* = 5.5, 3.1 Hz, 1H, H-2), 5.55 (t, *J* = 9.8 Hz, 1H, H-4'), 5.35 (dd, *J* = 9.8, 3.3 Hz, 1H, H-3'), 5.31 (t, *J* = 2.6 Hz, 1H, H-2'), 5.24 (d, *J* = 1.8 Hz, 1H, H-1'), 5.10 (t, *J* = 6.1 Hz, 1H, H-3), 4.56 (d, *J* = 11.8 Hz, 1H), 4.52 (d, *J* = 11.8 Hz, 1H), 4.31 (t, *J* = 6.3 Hz, 1H, H-4), 4.26 (dd, *J* = 6.5, 3.1 Hz, 1H, H-5), 3.88 (d, *J* = 9.6 Hz, 1H, H-5'), 3.77 (dd, *J* = 10.6, 3.3 Hz, 1H, H-6a), 3.73 – 3.67 (m, 1H, H-6b), 3.37 (s, 4H, OMe and H-6'a), 3.30 (d, *J* = 10.6 Hz, 1H, H-6'b), 2.09 (s, 3H, CH<sub>3</sub>-OAc), 1.99 (s, 3H, CH<sub>3</sub>-OAc), 1.92 (s, 3H, CH<sub>3</sub>-OAc), 1.49 (s, 9H, CH<sub>3</sub>-TBDPS), 1.02 (s, 9H, CH<sub>3</sub>-Boc). <sup>13</sup>C NMR (100 MHz, CDCl<sub>3</sub>) δ 170.19, 169.98, 169.36, 165.48, 151.79, 149.55, 147.91, 142.34, 137.91, 135.78, 135.65, 135.23, 133.60, 133.42, 133.16, 129.96, 129.60, 129.51, 128.98, 128.53, 128.36, 127.70, 127.66, 127.63, 127.52, 122.33, 96.38, 87.64, 82.26, 81.38, 78.35, 75.32, 75.23, 73.55, 71.38, 69.93, 69.67, 69.60, 65.64, 61.59, 58.56, 28.16, 26.68, 20.85, 20.83, 20.76, 19.34. HRMS (ESI) calcd for C<sub>59</sub>H<sub>68</sub>N<sub>5</sub>O<sub>16</sub>ISiNa [M+Na]<sup>+</sup>: 1280.3367, found: 1280.3384.

**(2,3,4,6-Tetra-*O*-benzoyl-β-D-galacopyranosyl)-(1→6)-(2,3,4-tri-*O*-benzoyl-β-D-glucopyranosyl) 5-fluorouracil (57)**

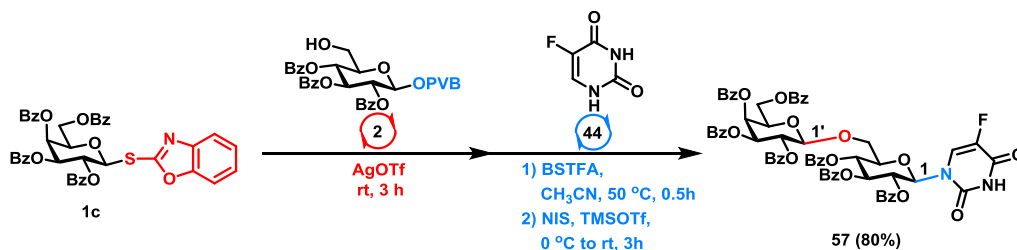

BSTFA (65.0  $\mu$ L, 0.245 mmol) was added to a stirred suspension of 5-fluorouracil **44** (16.0 mg, 0.123 mmol) in dry  $\text{CH}_3\text{CN}$  (1.2 mL) under Ar atmosphere. The mixture was stirred at 50  $^\circ\text{C}$  for 30 min to prepare the silylated 5-fluorouracil.

A suspension of SBox donor **1c**<sup>[5]</sup> (60.9 mg, 0.084 mmol), glucosyl PVB acceptor **2** (43.0 mg, 0.062 mmol), and activated 3Å MS (300 mg) in dry  $\text{CH}_2\text{Cl}_2$  (1.2 mL) was stirred at room temperature for 15 min, to which AgOTf (32.0 mg, 0.125 mmol) was added to the mixture. After being stirred at room temperature for another 3 h, the above freshly prepared silylated 5-fluorouracil solution was added to the reaction mixture, the reaction mixture was cooled to 0  $^\circ\text{C}$ , then NIS (20.7mg, 0.092 mmol) and TMSOTf (5.6  $\mu$ L, 0.033 mmol) were added successively at 0  $^\circ\text{C}$ . The resulting mixture was warmed gradually to room temperature and stirred for 3h, then was quenched with  $\text{Et}_3\text{N}$  (1.2mL) and filtered. The filtrates were concentrated under vacuum to give a residue, which was purified by flash column chromatography (petroleum ether-EtOAc, 1.7:1 to 1:1), followed by purification over a Sephadex<sup>TM</sup> LH-20 column (DCM/MeOH 1:1) to afford **57** (58.0 mg, 80%) as a syrup.  $[\alpha]_{\text{D}}^{22} = +52.30$  (*c* 0.23,  $\text{CHCl}_3$ );  $^1\text{H}$  NMR (400 MHz, Chloroform-*d*)  $\delta$  9.25 (s, 1H, H-NH), 8.18 (d, *J* = 7.8 Hz, 2H, Ar), 8.11 (d, *J* = 7.7 Hz, 2H, Ar), 8.01 (d, *J* = 7.6 Hz, 2H, Ar), 7.92 (d, *J* = 7.8 Hz, 2H, Ar), 7.83 (d, *J* = 7.8 Hz, 4H, Ar), 7.71 – 7.61 (m, 4H, H=CH-, Ar), 7.59 – 7.36 (m, 13H, Ar), 7.34 – 7.24 (m, 7H, Ar), 6.15 (d, *J* = 9.2 Hz, 1H, **H-1**), 6.07 – 5.97 (m, 2H, H-3, H-4'), 5.92 (t, *J* = 9.1 Hz, 1H, H-2'), 5.78 (dd, *J* = 10.6, 3.5 Hz, 1H, H-3'), 5.48 (t, *J* = 9.9 Hz, 1H, H-4), 5.16 (t, *J* = 9.5 Hz, 1H, H-2), 4.95 (d, *J* = 7.7 Hz, 1H, **H-1'**), 4.66 (dd, *J* = 11.1, 6.1 Hz, 1H), 4.44 – 4.28 (m, 3H, H-6), 4.22 (d, *J* = 9.5 Hz, 1H, H-5), 3.76 (dd, *J* = 11.7, 3.9 Hz, 1H, H-6).  $^{13}\text{C}$  NMR (101 MHz,  $\text{CDCl}_3$ )  $\delta$  166.05, 165.69, 165.64, 165.61, 165.44, 165.27, 165.02, 156.64, 156.38, 148.88, 142.20, 139.82, 133.83, 133.77, 133.58, 133.47, 133.43, 133.39, 130.07, 130.00, 129.95, 129.89, 129.82, 129.73, 129.37, 129.14, 129.00, 128.79, 128.74, 128.64, 128.56, 128.48, 128.41, 128.38, 128.32, 127.94, 124.15, 123.81, 102.08, 80.79, 77.36,

75.77, 72.40, 71.49, 71.23, 70.39, 69.97, 68.22, 68.09, 66.79, 61.86. HRMS (ESI) calcd for  $C_{65}H_{51}FN_2O_{19}Na$   $[M+Na]^+$  1205.2962, found 1205.2961.

**(2,3,4,6-Tetra-*O*-benzoyl- $\beta$ -D-galactopyranosyl)-(1 $\rightarrow$ 5)-(2,3-di-*O*-benzoyl- $\beta$ -D-ribofuranoyl)  
4-*N*-benzoylcytosine (**58**)**

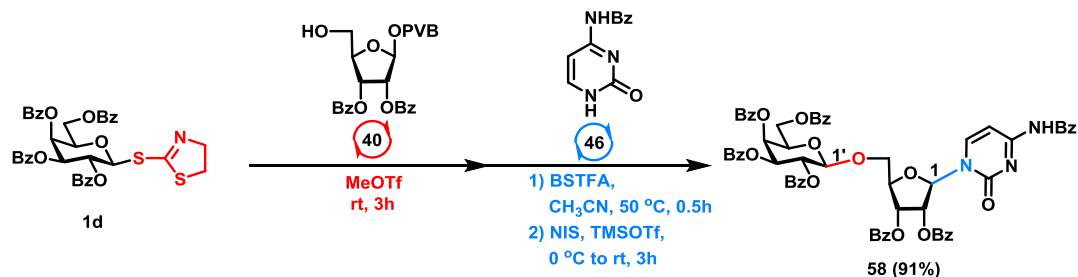

BSTFA (100.3  $\mu$ L, 0.378 mmol) was added to a stirred suspension of 4-*N*-benzoylcytosine **46** (40.7 mg, 0.189 mmol) in dry  $CH_3CN$  (1.9mL) under Ar atmosphere. The mixture was stirred at 50  $^{\circ}C$  for 30 min to prepare the silylated 4-*N*-benzoylcytosine.

A suspension of STaz galactoside donor **1d**<sup>[6]</sup> (86.0 mg, 0.123 mmol), glucosyl PVB acceptor **40** (53.4 mg, 0.095 mmol), and activated 3Å MS (300 mg) in dry  $CH_2Cl_2$  (1 mL) was stirred at room temperature for 15 min, to which MeOTf (22  $\mu$ L, 0.194 mmol) was added to the mixture slowly. After being stirred at room temperature for 3 h, the above freshly prepared silylated 4-*N*-benzoylcytosine solution was added to the reaction mixture, the reaction mixture was cooled to 0  $^{\circ}C$ , then NIS (32.0mg, 0.142 mmol) and TMSOTf (8.6  $\mu$ L, 0.047 mmol) were added successively at 0  $^{\circ}C$ . The resulting mixture was warmed gradually to room temperature and stirred for 3h, then was quenched with  $Et_3N$  (1.5mL) and filtered. The filtrates were concentrated under vacuum to give a residue, which was purified by flash column chromatography (petroleum ether-EtOAc, 1:1), followed by purification over a Sephadex<sup>TM</sup> LH-20 column (DCM/MeOH 1:1) to afford **58** (97.6 mg, 91%) as a syrup.  $[\alpha]_D^{21} = -5.69$  ( $c$  0.13,  $CHCl_3$ );  $^1H$  NMR (400 MHz, Chloroform- $d$ )  $\delta$  8.89 (s, 1H, H-NH), 8.37 (d,  $J = 7.6$  Hz, 1H, H=CH-), 8.15 (d,  $J = 7.3$  Hz, 2H, Ar), 8.05 (d,  $J = 7.8$  Hz, 2H, Ar), 8.01 – 7.88 (m, 9H, Ar), 7.82 (d,  $J = 7.7$  Hz, 2H, Ar), 7.65 – 7.50 (m, 9H, Ar), 7.47 – 7.33 (m, 9H, Ar), 7.30 – 7.22 (m, 3H, Ar), 6.62 (d,  $J = 5.6$  Hz, 1H, **H-1**), 6.12 (d,  $J = 3.4$  Hz, 1H, H-4'), 5.99 – 5.92 (m, 1H, H-2'), 5.79 (dd,  $J = 10.4, 3.6$  Hz, 1H, H-3'), 5.70 (t,  $J = 4.7$  Hz, 1H, H-3), 5.58 (t,  $J = 5.7$  Hz, 1H, H-2), 5.11 (d,  $J = 7.9$  Hz, 1H, **H-1'**), 4.78 (dd,  $J = 10.6, 5.8$  Hz, 1H), 4.58 – 4.46 (m, 4H, H-4), 4.04 (d,  $J = 9.2$  Hz, 1H).  $^{13}C$  NMR (101 MHz,  $CDCl_3$ )



$\delta$  166.10, 165.71, 165.66, 165.62, 165.38, 164.79, 133.74, 133.69, 133.53, 133.41, 133.17, 130.03, 130.00, 129.89, 129.86, 129.83, 129.41, 129.02, 128.92, 128.89, 128.81, 128.78, 128.69, 128.56, 128.54, 128.44, 128.39, 127.82, 101.65, 87.99, 82.24, 77.36, 75.09, 71.81, 71.65, 71.43, 69.84, 68.38, 68.19, 61.98. HRMS (ESI) calcd for  $C_{64}H_{52}N_3O_{17}$   $[M+H]^+$  1134.3291, found 1134.3284.

**(2,3,4,6-Tetra-*O*-benzoyl- $\beta$ -D-glucopyranosyl)-(1 $\rightarrow$ 6)-(2,3,4-tri-*O*-benzoyl- $\beta$ -D-glucopyranosyl) trifluorothymine (**59**)**

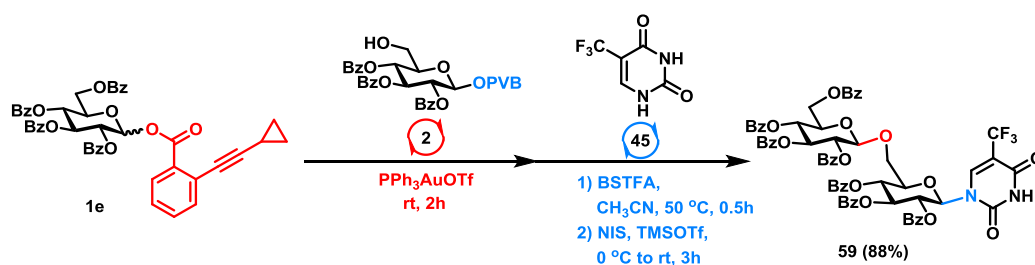

BSTFA (227.5  $\mu$ L, 0.859 mmol) was added to a stirred suspension of trifluorothymine **45** (51.5 mg, 0.286 mmol) in dry  $CH_3CN$  (2.8 mL) under Ar atmosphere. The mixture was stirred at 50  $^{\circ}C$  for 30 min to prepare the silylated trifluorothymine.

A suspension of glucosyl ABz donor **1e**<sup>[4]</sup> (131.3 mg, 0.172 mmol), glucosyl PVB **2** (100.0 mg, 0.143 mmol), and activated 3 $\text{\AA}$  MS (500 mg) in dry  $CH_2Cl_2$  (1.7 mL) was stirred at room temperature for 15 min, to which a freshly prepared solution of  $PPh_3AuOTf$  in  $CH_2Cl_2$  (0.36 mL, 0.079 M) was added to the mixture slowly. After being stirred at room temperature for 2 h, the above freshly prepared silylated trifluorothymine solution was added to the reaction mixture, the reaction mixture was cooled to 0  $^{\circ}C$ , then NIS (48.3 mg, 0.215 mmol) and TMSOTf (13.0  $\mu$ L, 0.072 mmol) were added successively at 0  $^{\circ}C$ . The resulting mixture was warmed gradually to room temperature and stirred for 3h, then was quenched with  $Et_3N$  (0.8mL) and filtered. The filtrates were concentrated under vacuum to give a residue, which was purified by flash column chromatography (petroleum ether-EtOAc, 2.3:1 to 1.5:1), followed by purification over a Sephadex<sup>TM</sup> LH-20 column (DCM/MeOH 1:1) to afford **59** (155.0 mg, 88%) as a syrup.  $[\alpha]_D^{21} = +22.52$  ( $c$  0.13,  $CHCl_3$ );  $^1H$  NMR (400 MHz, Chloroform- $d$ )  $\delta$  9.02 (s, 1H, H-NH), 8.14 (s, 1H, H=CH-), 8.08 (d,  $J$  = 7.8 Hz, 2H, Ar), 8.04 (d,  $J$  = 7.7 Hz, 2H, Ar), 7.97 – 7.85 (m, 6H, Ar), 7.80 (d,  $J$  = 7.8 Hz, 2H, Ar), 7.67 (d,  $J$  = 7.7 Hz, 2H, Ar), 7.59 – 7.19 (m, 21H, Ar), 6.20 (d,  $J$  = 9.3 Hz, 1H, **H-1**), 6.10 (t,  $J$  = 9.6 Hz, 1H, H-3), 6.02 (t,  $J$  = 9.7 Hz, 1H, H-3'), 5.73 (t,  $J$  = 9.7 Hz, 1H,

H-4'), 5.61 (t,  $J = 8.8$  Hz, 1H, H-2'), 5.51 (t,  $J = 9.8$  Hz, 1H, H-4), 5.39 (t,  $J = 9.5$  Hz, 1H, H-2), 4.97 (d,  $J = 7.6$  Hz, 1H, **H-1'**), 4.64 (dd,  $J = 12.6, 3.2$  Hz, 1H, H-6'), 4.50 (dd,  $J = 12.3, 4.9$  Hz, 1H, H-6'), 4.35 – 4.14 (m, 3H, H-5, H-5', H-6), 3.79 (dd,  $J = 11.5, 4.9$  Hz, 1H, H-6).  $^{13}\text{C}$  NMR (101 MHz,  $\text{CDCl}_3$ )  $\delta$  166.18, 165.88, 165.50, 165.23, 165.19, 157.69, 149.06, 141.00, 133.94, 133.79, 133.53, 133.52, 133.40, 133.37, 133.27, 129.95, 129.93, 129.89, 129.84, 129.80, 129.76, 129.55, 129.15, 128.81, 128.80, 128.61, 128.55, 128.54, 128.50, 128.43, 128.38, 128.34, 127.69, 122.98, 120.29, 106.91, 106.58, 101.72, 80.81, 77.36, 76.36, 72.55, 72.41, 71.93, 70.65, 69.65, 68.50, 67.42, 63.00. HRMS (ESI) calcd for  $\text{C}_{66}\text{H}_{51}\text{F}_3\text{N}_2\text{O}_{19}\text{Na}$   $[\text{M}+\text{Na}]^+$  1255.2930, found 1255.2924.

**(2,3,4,6-Tetra-*O*-benzoyl- $\beta$ -D-glucopyranosyl)-(1 $\rightarrow$ 6)-(2,3,4-tri-*O*-benzoyl- $\beta$ -D-glucopyranosyl) (1 $\rightarrow$ 6)-(2,3,4-tri-*O*-benzoyl- $\beta$ -D-glucopyranosyl) trifluorothymine (**60**)**

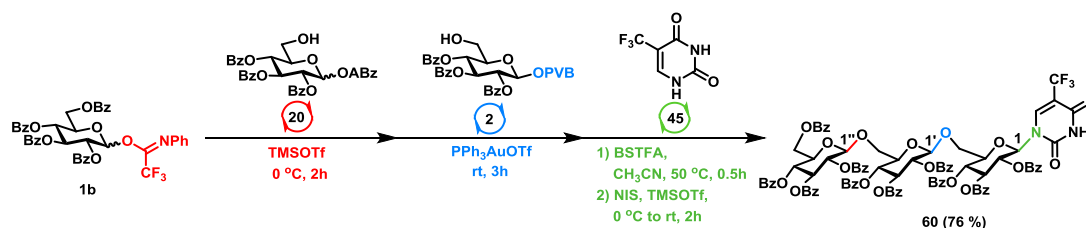

BSTFA (165.0  $\mu\text{L}$ , 0.621 mmol) was added to a stirred suspension of trifluorothymine **45** (37.3 mg, 0.207 mmol) in dry  $\text{CH}_3\text{CN}$  (2.0 mL) under Ar atmosphere. The mixture was stirred at 50  $^\circ\text{C}$  for 30 min to prepare silylated trifluorothymine.

A suspension of glucosyl trifluoroacetimidate **1b**<sup>[3]</sup> (103.2 mg, 0.135 mmol), glucosyl ABz **20**<sup>[9]</sup> (75.1 mg, 0.114 mmol), and activated 3Å MS (600 mg) in dry  $\text{CH}_2\text{Cl}_2$  (2.2 mL) was stirred at room temperature for 15 min and was then cooled to 0  $^\circ\text{C}$ . TMSOTf (4.0  $\mu\text{L}$ , 0.023 mmol) was added to the mixture dropwise. After being stirred at 0  $^\circ\text{C}$  for another 2 h, the reaction mixture was warmed up to room temperature, to which glucosyl PVB **2** (72.0 mg, 0.104 mmol) and a freshly prepared solution of  $\text{PPh}_3\text{AuOTf}$  in  $\text{CH}_2\text{Cl}_2$  (0.4mL, 0.052M) were added successively. After being stirred at room temperature for another 3h. the above freshly prepared silylated trifluorothymine solution was added to the reaction mixture, the reaction mixture was cooled to 0  $^\circ\text{C}$ , then NIS (34.9mg, 0.155 mmol) and TMSOTf (5.6  $\mu\text{L}$ , 0.031 mmol) were added successively at 0  $^\circ\text{C}$ . The resulting mixture was warmed gradually to room temperature and stirred

for 2h, then was quenched with Et<sub>3</sub>N (0.5mL) and filtered. The filtrates were concentrated under vacuum to give a residue, which was purified by flash column chromatography (petroleum ether-EtOAc, 2:1), followed by purification over a Sephadex<sup>TM</sup> LH-20 column (DCM/MeOH 1:1) to afford **60** (133.4 mg, 76%) as a syrup.  $[\alpha]_D^{22} = -12.73$  (*c* 0.30, CHCl<sub>3</sub>); <sup>1</sup>H NMR (600 MHz, Chloroform-*d*)  $\delta$  9.03 (s, 1H, H-NH), 8.27 (s, 1H, H=CH-), 8.02 (t, *J* = 6.5 Hz, 4H, Ar), 7.94 (d, *J* = 8.1 Hz, 4H, Ar), 7.87 (t, *J* = 6.8 Hz, 4H, Ar), 7.83 (t, *J* = 6.3 Hz, 4H, Ar), 7.76 (d, *J* = 7.3 Hz, 2H, Ar), 7.64 (d, *J* = 7.4 Hz, 2H, Ar), 7.56 – 7.51 (m, 2H, Ar), 7.49 – 7.43 (m, 3H, Ar), 7.43 – 7.19 (m, 23H, Ar), 7.13 (t, *J* = 7.9 Hz, 2H, Ar), 6.17 (d, *J* = 9.2 Hz, 1H, **H-1**), 6.10 (t, *J* = 9.7 Hz, 1H, H-3''), 6.06 (t, *J* = 9.7 Hz, 1H, H-3), 5.77 (t, *J* = 9.7 Hz, 1H, H-3'), 5.68 (t, *J* = 9.6 Hz, 1H, H-4''), 5.65 – 5.60 (m, 2H, H-2, H-4), 5.55 (dd, *J* = 9.9, 7.8 Hz, 1H, H-2''), 5.18 (dd, *J* = 9.9, 7.8 Hz, 1H, H-2'), 5.14 (d, *J* = 7.8 Hz, 1H, **H-1''**), 5.08 (t, *J* = 9.7 Hz, 1H, H-4'), 4.64 (dd, *J* = 11.8, 2.3 Hz, 1H), 4.58 (d, *J* = 7.8 Hz, 1H, **H-1'**), 4.50 – 4.42 (m, 2H, H-5''), 4.01 (d, *J* = 10.7 Hz, 2H), 3.97 – 3.89 (m, 2H, H-5, H-5'), 3.83 (dd, *J* = 11.9, 8.3 Hz, 1H), 3.42 (d, *J* = 8.5 Hz, 1H). <sup>13</sup>C NMR (151 MHz, CDCl<sub>3</sub>)  $\delta$  166.37, 166.21, 165.65, 165.62, 165.40, 165.37, 165.34, 165.24, 165.18, 165.08, 157.85, 149.19, 141.50, 133.87, 133.73, 133.61, 133.44, 133.41, 133.38, 133.30, 133.25, 133.23, 130.11, 130.00, 129.97, 129.87, 129.85, 129.83, 129.74, 129.65, 129.27, 128.83, 128.77, 128.72, 128.71, 128.61, 128.56, 128.53, 128.51, 128.49, 128.47, 128.46, 128.43, 128.36, 128.34, 128.30, 127.88, 124.14, 122.34, 120.55, 118.76, 107.07, 106.85, 106.63, 106.40, 101.61, 100.86, 81.06, 75.56, 74.08, 72.83, 72.37, 72.35, 72.31, 71.99, 71.78, 70.54, 69.83, 69.78, 69.52, 68.79, 67.43, 63.34. HRMS (ESI) calcd for C<sub>93</sub>H<sub>73</sub>F<sub>3</sub>N<sub>2</sub>O<sub>27</sub>Na [M+Na]<sup>+</sup> 1729.4245, found 1729.4246.

## 2.5 Divergent and formal synthesis of TMG-chitotriomycin and lipochitooligosaccharides

### 2.5.1 Preparation of new glycosyl donors and acceptors

#### 3,4,6-Tri-*O*-benzyl-2-deoxy-2-*N*-benzyloxycarbonyl- $\alpha/\beta$ -D-glucopyranosyl

#### *N*-phenyltrifluoroacetimidate (**70**)

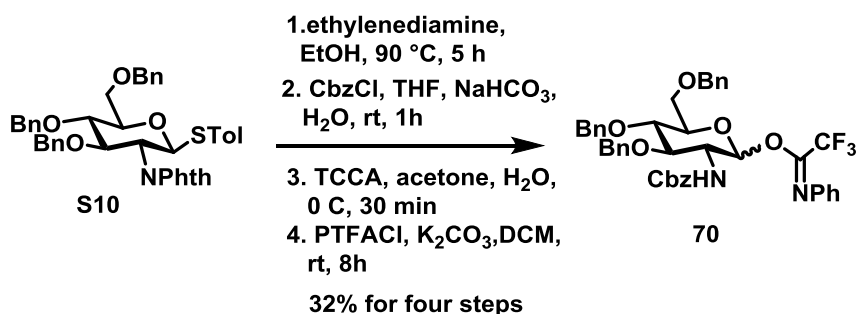

The known compound **S10**<sup>[24]</sup> (1.65 g, 2.41 mmol) was dissolved in 32 mL dry EtOH and 8 mL ethylenediamine, then the solution was reflux at 90 °C for 6 h. After concentration *in vacuo*, the crude product was directly used in the next step without purification. To a solution of the above crude amine, NaHCO<sub>3</sub> (808 mg, 9.64 mmol) in THF (18 mL) and H<sub>2</sub>O (18 mL) was slowly added benzyl chloroformate (0.52 mL, 3.62 mmol) at room temperature. The mixture was stirred at room temperature for 1 h. Then it was diluted with EtOAc, washed with H<sub>2</sub>O and brine successively. The organic phase was dried by Na<sub>2</sub>SO<sub>4</sub> and concentrated *in vacuo*. The resulting residue was purified by silica gel column chromatography (EtOAc/Petroleum ether/ CH<sub>2</sub>Cl<sub>2</sub> =1/3/1) afforded a white solid (1.28 g, 77 % over two steps). The above solid (710 mg, 0.96 mmol) was dissolved with acetone/H<sub>2</sub>O (20 mL/ 5 mL), and trichloroisocyanuric acid (232 mg, 0.96 mmol) was added at 0 °C. The mixture was stirred for 1 h at 0 °C and quenched with saturated aqueous NaHCO<sub>3</sub>, then it was diluted with EtOAc, washed with H<sub>2</sub>O and brine. The organic phase was dried by Na<sub>2</sub>SO<sub>4</sub> and concentrated *in vacuo*. The resulting residue was purified by silica gel column chromatography (EtOAc/Petroleum ether/ CH<sub>2</sub>Cl<sub>2</sub> =1/2/1) to afford the hemiacetal as a white solid (480 mg, 79%). To a solution of hemiacetal (450 mg, 0.75 mmol) in CH<sub>2</sub>Cl<sub>2</sub> (15 mL) was sequentially added 2,2,2-Trifluoro-*N*-phenylacetimidoyl chloride (174 mg, 0.84 mmol), K<sub>2</sub>CO<sub>3</sub> (207 mg, 1.5 mmol) at room temperature under Ar. The mixture was stirred for 24 h at this temperature and concentrated *in vacuo* to give the crude. Then it was purified by silica gel column chromatography (EtOAc/Petroleum ether/Et<sub>3</sub>N =1/10/0.33) to afford **70** as a light yellow solid (294 mg, 52%) and recovery the starting material (200 mg, 44%). <sup>1</sup>H NMR (400 MHz, Chloroform-*d*) δ 7.39 – 7.19 (m, 21H), 7.07 (t, *J* = 7.4 Hz, 1H), 6.73 (d, *J* = 7.9 Hz, 2H), 6.28 (s, 1H), 5.13 (d, *J* = 12.0 Hz, 1H), 5.05 (d, *J* = 12.0 Hz, 1H), 4.85 (dd, *J* = 17.1, 11.0 Hz, 2H), 4.72 – 4.54 (m, 3H), 4.54 – 4.48 (m, 2H), 4.15 (s, 1H), 3.90 – 3.65 (m, 3H). <sup>13</sup>C NMR (101 MHz, CDCl<sub>3</sub>) δ 155.87, 143.27, 137.83, 137.73, 136.11, 128.75, 128.61, 128.56, 128.54, 128.46, 128.36, 128.32,

128.12, 128.02, 127.99, 127.88, 127.77, 124.41, 119.30, 79.46, 79.45, 77.73, 75.29, 75.22, 73.53, 68.05, 67.23, 54.11.

### Synthesis of compounds 71, 72 and 73

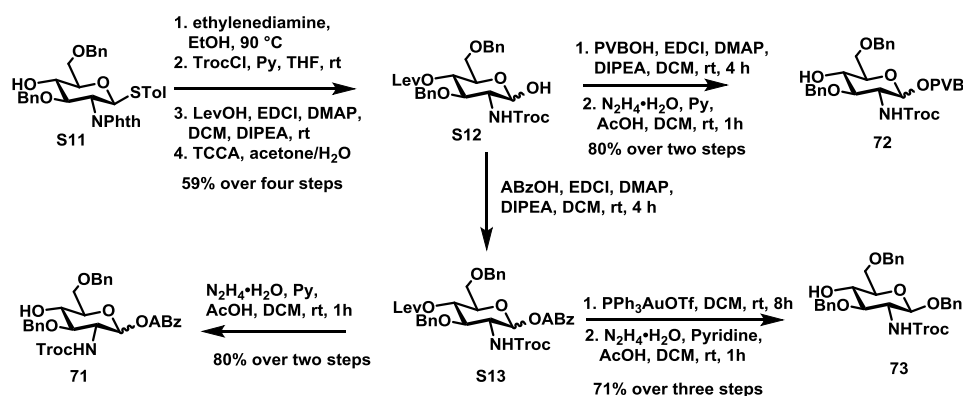

### 3,5-Di-*O*-benzyl-2-deoxy-2-*N*-2,2,2-trichloroethoxycarbonyl- $\alpha/\beta$ -D-glucopyranosyl

#### 2-(cyclopropylethynyl) benzoate (71)

The known compound **S11**<sup>[25]</sup> (2.96 g, 4.97 mmol) was dissolved in 77 mL dry EtOH and 18 mL ethylenediamine, then the solution was refluxed at 90 °C for 6 h. After concentration *in vacuo*, the crude product was directly used in the next step without purification. To a solution of the above crude amine in THF (38 mL) and pyridine (1.2 mL) was slowly added TrocCl (1.03 mL, 7.45 mmol) at 0 °C under Ar. The mixture was stirred at room temperature for 1 h, then quenched with MeOH and concentrated *in vacuo*. The residue was diluted with CH<sub>2</sub>Cl<sub>2</sub>, washed with H<sub>2</sub>O and brine successively. The organic phase was dried by Na<sub>2</sub>SO<sub>4</sub> and concentrated *in vacuo*. The resulting residue was purified by silica gel column chromatography (EtOAc/Petroleum ether = 1/2) to afford the product as a white solid (2.62 g, 82 % over two steps). The above solid (2.28 g, 3.57 mmol), EDCI (1.23 g, 6.43 mmol) and DMAP (216 mg, 1.78 mmol) were dissolved in 27 mL CH<sub>2</sub>Cl<sub>2</sub>. Then levulinic acid (0.55 mL, 5.36 mmol) and DIPEA (1.78 mL, 10.71 mmol) were added successively at room temperature under Ar. The resulting mixture was stirred for 4 h at this temperature and concentrated *in vacuo* to produce the crude oil. Then it was purified by silica gel column chromatography (EtOAc/Petroleum ether/ CH<sub>2</sub>Cl<sub>2</sub> = 1/2/1) to afford a white solid (2.41 g, 91%). The above solid (2.4 g, 3.24 mmol) was dissolved with acetone/H<sub>2</sub>O (64 mL/ 16 mL), and trichloroisocyanuric acid (756 mg, 3.24 mmol) was added at 0 °C. The mixture was stirred for 1 h at 0 °C and quenched with saturated aqueous NaHCO<sub>3</sub>, then it was diluted with EtOAc, washed

---

with H<sub>2</sub>O and brine. The organic phase was dried by Na<sub>2</sub>SO<sub>4</sub> and concentrated *in vacuo*. The resulting residue was purified by silica gel column chromatography (EtOAc/Petroleum ether/CH<sub>2</sub>Cl<sub>2</sub> = 1/1/1) to afford the hemiacetal **S12** as a white solid (1.63 g, 80%).

The white solid **S12** (1.0 g, 1.58 mmol), EDCI (548 mg, 2.85 mmol) and DMAP (193 mg, 1.58 mmol) were dissolved in 15 mL CH<sub>2</sub>Cl<sub>2</sub>. Then 2-(cyclopropylethynyl) benzoic acid (353 mg, 1.90 mmol) and DIPEA (0.78 mL, 4.75 mmol) were added successively at room temperature under Ar. The resulting mixture was stirred for 6 h at this temperature and concentrated *in vacuo* to produce the crude oil. Then it was purified by silica gel column chromatography (EtOAc/Petroleum ether = 1/2) to afford a white foam **S13** (1.1 g, 87%). To a solution of **S13** (600 mg, 0.75 mmol) in 15 mL dry CH<sub>2</sub>Cl<sub>2</sub> was added 1 M hydrazine hydrate (1.50 mL, 1.50 mmol, hydrazine hydrate/pyridine/AcOH = 125 µL/1.4 mL/1 mL) at room temperature. The mixture was stirred at room temperature for 1 h. Then it was quenched with acetone and concentrated *in vacuo*. The resulting residue was purified by silica gel column chromatography (EtOAc/Petroleum ether = 1/3) to afford **71** (485 mg, 92%,  $\alpha/\beta$  = 1.3/1) as a white foam. Data for the  $\alpha$ -anomer:  $[\alpha]_D^{24}$  = +77.43 (c 0.21, CHCl<sub>3</sub>); <sup>1</sup>H NMR (400 MHz, Chloroform-*d*)  $\delta$  7.88 (d, *J* = 7.9 Hz, 1H), 7.57 – 7.38 (m, 2H), 7.38 – 7.20 (m, 11H), 6.46 (d, *J* = 3.6 Hz, 1H, **H-1**), 5.35 (d, *J* = 9.4 Hz, 1H, H-NH), 5.01 – 4.70 (m, 3H, H-Troc and H-Bn), 4.63 – 4.45 (m, 3H, H-Troc and H-Bn), 4.23 (td, *J* = 9.7, 3.6 Hz, 1H, H-2), 4.00 – 3.86 (m, 3H, H-3, H-4, H-5), 3.78 (dd, *J* = 10.5, 3.0 Hz, 1H, H-6), 3.66 (dd, *J* = 10.5, 3.0 Hz, 1H, H-6), 3.32 (s, 1H, H-OH), 1.68 – 1.48 (m, 1H, H-ABz), 0.95 – 0.80 (m, 4H, H-ABz). <sup>13</sup>C NMR (101 MHz, CDCl<sub>3</sub>)  $\delta$  164.07, 153.54, 137.51, 136.83, 134.33, 131.64, 130.43, 129.52, 127.75, 127.73, 127.12, 127.05, 126.81, 126.69, 123.68, 99.18, 94.60, 91.76, 78.65, 74.94, 73.93, 73.27, 73.04, 71.83, 71.27, 69.05, 52.77, 8.64, 8.56. HRMS (ESI) calcd for C<sub>35</sub>H<sub>34</sub>NO<sub>8</sub>Cl<sub>3</sub>Na [M+Na]<sup>+</sup> 724.1242, found 724.1242.

### **3,5-Di-*O*-benzyl-2-deoxy-2-*N*-2,2,2-trichloroethoxycarbonyl- $\alpha/\beta$ -D-glucopyranosyl**

#### **2-(1-phenylvinyl) benzoate (72)**

The white solid **S12** (483 mg, 0.765 mmol), EDCI (264 mg, 1.377 mmol) and DMAP (93 mg, 0.765 mmol) were dissolved in 7 mL CH<sub>2</sub>Cl<sub>2</sub>. Then 2-(1-Phenylvinyl) benzoic acid (206 mg, 0.92 mmol) and DIPEA (0.38 mL, 2.30 mmol) were added successively at room temperature under Ar.

The resulting mixture was stirred for 6 h at this temperature and concentrated *in vacuo* to produce the crude sryup. Then it was purified by silica gel column chromatography (EtOAc/Petroleum ether =1/2) to afford a white solid (580 mg, 90%). To a solution of this solid (580 mg, 0.69 mmol) in 12 mL dry CH<sub>2</sub>Cl<sub>2</sub> was added 1 M hydrazine hydrate (1.38 mL, 1.38 mmol, hydrazine hydrate/pyridine/AcOH = 125 µL/1.4 mL/1 mL) at room temperature. The mixture was stirred at room temperature for 1 h. Then it was quenched with acetone and concentrated *in vacuo*. The resulting residue was purified by silica gel column chromatography (EtOAc/Petroleum ether =1/3) to afford **72** (465 mg, 91%,  $\alpha/\beta = 1.6/1$ ) as a white foam. Data for the  $\alpha$ -anomer:  $[\alpha]_D^{24} = +54.05$  (c 0.19, CHCl<sub>3</sub>); <sup>1</sup>H NMR (400 MHz, Chloroform-*d*)  $\delta$  7.87 (d,  $J = 7.7$  Hz, 1H), 7.43 (t,  $J = 7.3$  Hz, 1H), 7.35 (d,  $J = 7.2$  Hz, 3H), 7.30 – 7.05 (m, 14H), 6.14 (d,  $J = 3.8$  Hz, 1H, **H-1**), 5.93 (s, 1H, H-double bond), 5.09 (s, 1H, H-double bond), 4.66 (d,  $J = 12.0$  Hz, 1H, H-Bn), 4.56 (d,  $J = 9.9$  Hz, 1H, H-NH), 4.51- 4.36 (m, 3H, H-Troc and H-Bn), 4.27 (d,  $J = 11.5$  Hz, 1H, H-Bn), 4.05 (d,  $J = 11.5$  Hz, 1H, H-Bn), 3.89 (td,  $J = 9.9, 3.8$  Hz, 1H, H-2), 3.64 – 3.53 (m, 2H, H-4, H-6), 3.53 - 3.46 (m, 2H, H-5, H-6), 2.84 (t,  $J = 9.6$  Hz, 1H, H-3), 2.70 (s, 1H, H-OH). <sup>13</sup>C NMR (101 MHz, CDCl<sub>3</sub>)  $\delta$  166.85, 153.98, 148.85, 141.94, 138.85, 138.39, 137.67, 132.23, 131.07, 130.70, 130.62, 129.15, 128.84, 128.51, 128.42, 127.96, 127.89, 127.81, 127.67, 127.30, 127.09, 114.02, 95.44, 92.59, 80.22, 77.51, 77.39, 77.19, 76.88, 74.77, 74.70, 73.78, 72.52, 71.75, 69.72, 53.59. HRMS (ESI) calcd for C<sub>38</sub>H<sub>36</sub>NO<sub>8</sub>Cl<sub>3</sub>Na [M+Na]<sup>+</sup> 762.1399, found 762.1399.

### 3,4,6-tri-*O*-benzyl-2-deoxy-2-*N*-2,2,2-trichloroethoxycarbonyl- $\beta$ -D-glucopyranoside (**73**)

A suspension of **S13** (500 mg, 0.625 mmol), benzyl alcohol (97 mg, 0.938 mmol), and activated 3 Å MS (600 mg) in dry CH<sub>2</sub>Cl<sub>2</sub> (9 mL) was stirred at room temperature for 30 min under Ar. Then a freshly prepared solution of PPh<sub>3</sub>AuOTf in CH<sub>2</sub>Cl<sub>2</sub> (1 mL, 0.125 M) was added. The resulting mixture was stirred at room temperature for 6 h, then it was filtered. Then the mixture was filtered through a Celite pad and concentrated *in vacuo*. Purification by silica gel column chromatography (EtOAc/Petroleum ether =2/1) afforded a white solid (405 mg, 90%). To a solution of this solid (405 mg, 0.56 mmol) in 10 mL dry CH<sub>2</sub>Cl<sub>2</sub> was added 1 M hydrazine hydrate (1.2 mL, 1.2 mmol, hydrazine hydrate/pyridine/AcOH = 125 µL/1.4 mL/1 mL) at room temperature. The mixture was stirred at room temperature for 1 h. Then it was quenched with

acetone and concentrated *in vacuo*. The resulting residue was purified by silica gel column chromatography (EtOAc/Petroleum ether =1/3) afforded **73** (318 mg, 91%) as a white solid;  $[\alpha]_D^{24} = -23.65$  (c 0.17, CHCl<sub>3</sub>); <sup>1</sup>H NMR (400 MHz, Chloroform-*d*)  $\delta$  7.40 – 7.18 (m, 15H), 5.16 (d, *J* = 8.4 Hz, 1H, H-NH), 4.85 (d, *J* = 12.0 Hz, 1H, H-Bn), 4.79 – 4.50 (m, 8H, H-Bn, H-Troc and **H-1**), 3.79 – 3.71 (m, 2H, H-3 and H-4), 3.70 – 3.63 (m, 2H, H-5 and H-6), 3.45 (d, *J* = 8.9 Hz, 2H, H-2 and H-6), 2.93 (s, 1H, H-OH). <sup>13</sup>C NMR (101 MHz, CDCl<sub>3</sub>)  $\delta$  154.09, 138.26, 137.78, 137.24, 128.58, 128.55, 128.45, 128.12, 127.96, 127.91, 127.81, 99.35, 95.57, 80.59, 77.46, 77.34, 77.14, 76.82, 74.47, 74.20, 73.98, 73.76, 72.80, 70.70, 70.40, 57.25. HRMS (ESI) calcd for C<sub>30</sub>H<sub>32</sub>NO<sub>7</sub>Cl<sub>3</sub>Na [M+Na]<sup>+</sup> 646.1137, found 646.1139.

## 2.5.2 One-pot glycosylation for the formal synthesis of TMG-chitotriomycin and lipochitooligosaccharides

**Benzyl (3,4,6-tri-*O*-benzyl-2-deoxy-2-*N*-benzyloxycarbonyl- $\beta$ -D-glucopyranosyl)-(1 $\rightarrow$ 4) (3,6-di-*O*-benzyl-2-deoxy-2-*N*-2,2,2-trichloroethoxycarbonyl- $\beta$ -D-glucopyranosyl)-(1 $\rightarrow$ 4)-(3,6-di-*O*-benzyl-2-deoxy-2-*N*-2,2,2-trichloroethoxycarbonyl- $\beta$ -D-glucopyranosyl)-(1 $\rightarrow$ 4)-3,5-di-*O*-benzyl-2-deoxy-2-*N*-2,2,2-trichloroethoxycarbonyl- $\beta$ -D-glucopyranoside (**74**)**

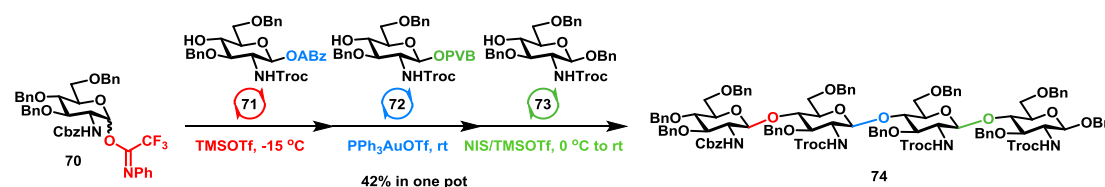

A suspension of PTFAI donor **70**<sup>[26]</sup> (165 mg, 0.219 mmol), ABz **71** (110 mg, 0.157 mmol), and activated 3 Å MS (500 mg) in dry CH<sub>2</sub>Cl<sub>2</sub> (3 mL) was stirred at room temperature for 30 min under Ar. Then the mixture was cooled to – 15 °C and a solution of TMSOTf in CH<sub>2</sub>Cl<sub>2</sub> (0.1 mL, 42 µL in 1 mL CH<sub>2</sub>Cl<sub>2</sub>, 0.024 mmol) was added to the mixture dropwise. After being stirred at – 15 °C for 2.0 h, the reaction mixture was warmed to room temperature, to which PVB **72** (92.0 mg, 0.124 mmol) and a freshly prepared solution of PPh<sub>3</sub>AuOTf in CH<sub>2</sub>Cl<sub>2</sub> (1.0 mL, 0.03 M, 0.03 mmol) were added successively. The resulting mixture was stirred at room temperature overnight, then acceptor **73** (70 mg, 0.112 mmol), NIS (33 mg, 0.149 mmol) and TMSOTf (0.1 mL, 30 µL in 1 mL CH<sub>2</sub>Cl<sub>2</sub>, 0.020 mmol) were added successively at 0 °C. The resulting mixture was warmed



gradually to room temperature and stirred for 3 h, then quenched with Et<sub>3</sub>N, filtered with Celite and concentrated *in vacuo*. The residue was purified by flash column chromatography (EtOAc/Petroleum ether = 1/2) and Sephadex LH-20 (CH<sub>2</sub>Cl<sub>2</sub>/MeOH = 1/1) to give **74** (103 mg, 42 %) as a white solid:  $[\alpha]_D^{23} = -9.23$  (c 0.16, CHCl<sub>3</sub>); <sup>1</sup>H NMR (400 MHz, Chloroform-*d*)  $\delta$  7.40 – 7.09 (m, 55H, H-Ar, ArH-Bn and Cbz), 5.08 (s, 2H, H-Cbz), 5.00 – 4.90 (m, 3H), 4.87 (d, *J* = 12.1 Hz, 1H), 4.79 – 4.66 (m, 5H), 4.65 – 4.45 (m, 13H), 4.41 – 4.28 (m, 5H), 4.24 – 4.06 (m, 6H), 3.95 (t, *J* = 8.1 Hz, 1H), 3.92 – 3.85 (m, 2H), 3.79 – 3.73 (m, 2H), 3.73 – 3.65 (m, 1H), 3.64 – 3.43 (m, 10H), 3.40 – 3.33 (m, 3H), 3.30 – 3.21 (m, 1H), 3.16 – 3.01 (m, 4H). <sup>13</sup>C NMR (151 MHz, CDCl<sub>3</sub>)  $\delta$  156.12, 154.37, 154.31, 154.14, 139.29, 139.04, 138.40, 138.26, 137.96, 137.87, 137.50, 136.75, 129.23, 129.11, 128.88, 128.77, 128.75, 128.67, 128.63, 128.61, 128.58, 128.52, 128.46, 128.44, 128.40, 128.32, 128.21, 128.17, 128.12, 128.01, 127.98, 127.93, 127.84, 127.79, 127.77, 127.66, 127.58, 127.51, 101.01, 100.90, 100.55, 99.78, 95.89, 95.82, 82.32, 80.38, 80.06, 78.81, 78.57, 75.12, 75.02, 74.92, 74.70, 74.65, 74.61, 74.42, 74.28, 74.20, 73.85, 73.59, 73.49, 70.82, 69.03, 68.52, 68.18, 67.99, 66.94, 58.63, 58.06, 57.34, 56.69, 53.69. HRMS (ESI) calcd for C<sub>111</sub>H<sub>115</sub>N<sub>4</sub>O<sub>25</sub>Cl<sub>9</sub>Na<sub>2</sub> [M+2Na]<sup>2+</sup> 1132.2416, found 1132.2410.

**Benzyl (3,4,6-tri-*O*-benzyl-2-deoxy-2-*N*-benzyloxycarbonyl- $\beta$ -D-glucopyranosyl)-(1 $\rightarrow$ 4)-(3,6-di-*O*-benzyl-2-deoxy-2-acetamido- $\beta$ -D-glucopyranosyl)-(1 $\rightarrow$ 4)-(3,6-di-*O*-benzyl-2-deoxy-2-acetamido- $\beta$ -D-glucopyranosyl)-(1 $\rightarrow$ 4)-3,6-di-*O*-benzyl-2-deoxy-2-acetamido- $\beta$ -D-glucopyranoside (**75**)**

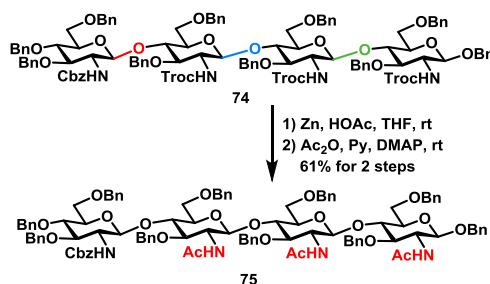

To a solution of compound **74** (102 mg, 0.046 mmol) in 13 mL AcOH was added 1.3 g Zinc powder at room temperature. The mixture was vigorously stirred for 16 h. Then it was filtered with Celite and concentrated *in vacuo* to give the crude. The above crude and DMAP (20 mg, 0.16 mmol) were dissolved in 6 mL pyridine and 2 mL Ac<sub>2</sub>O at room temperature. The mixture was stirred overnight, then concentrated *in vacuo* to give a light yellow oil. The residue was purified

by flash column chromatography ( $\text{CH}_2\text{Cl}_2/\text{MeOH} = 60/1$ ) and Sephadex LH-20 ( $\text{CH}_2\text{Cl}_2/\text{MeOH} = 1/1$ ) to give **75** (51 mg, 61 %) as a white amorphous solid:  $[\alpha]_{\text{D}}^{24} = -14.98$  (c 0.11,  $\text{CHCl}_3$ );  $^1\text{H}$  NMR (400 MHz, Chloroform-*d*)  $\delta$  7.41 – 7.11 (m, 55H, ArH-Bn and Cbz), 6.32 (d,  $J = 9.2$  Hz, 1H, H-NHAc), 5.90 – 5.80 (m, 1H, H-NHAc), 5.14 (d,  $J = 12.2$  Hz, 1H, H-Cbz), 5.04 (d,  $J = 12.2$  Hz, 1H, H-Cbz), 4.87 – 4.77 (m, 3H), 4.77 – 4.65 (m, 4H), 4.65 – 4.39 (m, 13H), 4.33 – 4.20 (m, 4H), 4.14 – 4.02 (m, 3H), 4.02 – 3.90 (m, 3H), 3.85 – 3.68 (m, 5H), 3.67 – 3.49 (m, 8H), 3.47 – 3.35 (m, 4H), 3.31 – 3.22 (m, 2H), 3.19 (s, 1H), 3.12 (s, 1H), 1.94 (s, 3H,  $\text{CH}_3\text{-NHAc}$ ), 1.78 (s, 3H,  $\text{CH}_3\text{-NHAc}$ ), 1.62 (s, 3H,  $\text{CH}_3\text{-NHAc}$ ).  $^{13}\text{C}$  NMR (151 MHz,  $\text{CDCl}_3$ )  $\delta$  170.52 ( $\text{N}(\text{C}=\text{O})\text{CH}_3$ ), 170.45 ( $\text{N}(\text{C}=\text{O})\text{CH}_3$ ), 170.05 ( $\text{N}(\text{C}=\text{O})\text{CH}_3$ ), 155.97 ( $\text{C}=\text{O}$  of Cbz), 139.08, 138.69, 138.53, 138.16, 138.02, 137.98, 137.94, 137.65, 137.58, 136.34, 128.62, 128.49, 128.46, 128.44, 128.41, 128.35, 128.33, 128.26, 128.25, 128.23, 128.21, 128.19, 128.12, 128.07, 128.05, 128.02, 127.97, 127.93, 127.90, 127.81, 127.78, 127.74, 127.70, 127.64, 127.59, 127.55, 127.53, 127.50, 127.44, 127.41, 127.36, 127.32, 127.29, 100.41, 99.51, 81.83, 79.68, 79.48, 78.23, 77.18, 77.12, 76.97, 76.90, 76.75, 75.11, 74.64, 74.59, 74.26, 73.88, 73.51, 73.38, 73.35, 73.27, 71.90, 70.07, 69.87, 68.91, 68.55, 66.76, 57.57, 54.11, 53.11, 52.74, 50.74, 45.71, 23.32 ( $\text{N}(\text{C}=\text{O})\text{CH}_3$ ), 23.15 ( $\text{N}(\text{C}=\text{O})\text{CH}_3$ ), 23.11 ( $\text{N}(\text{C}=\text{O})\text{CH}_3$ ). HRMS (ESI) calcd for  $\text{C}_{108}\text{H}_{118}\text{N}_4\text{O}_{22}\text{Na}_2$   $[\text{M}+2\text{Na}]^{2+}$  934.4011, found 934.4015.

(2-Amino-2-deoxy- $\beta$ -D-glucopyranosyl)-(1 $\rightarrow$ 4)-(2-acetamido-2-deoxy- $\beta$ -D-glucopyranosyl)-(1 $\rightarrow$ 4)-(2-acetamido-2-deoxy- $\beta$ -D-glucopyranosyl)-(1 $\rightarrow$ 4)-2-acetamido-2-deoxy- $\alpha,\beta$ -D-glucopyranose (**76**)

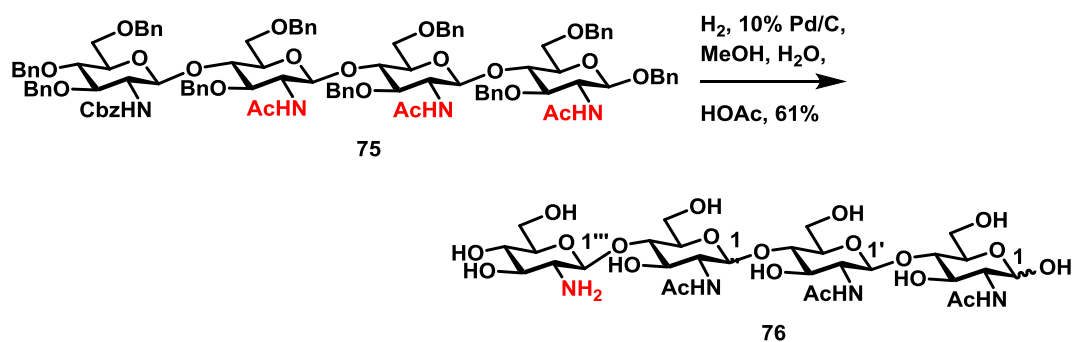

Compound **75** (48 mg) was dissolved in methanol/water/AcOH (10/1/0.1, 13 mL/1.3 mL/0.13 mL) and 10% palladium on activated charcoal (480 mg) was added. The flask was degassed using low

vacuum and flushed with hydrogen (3 times). The mixture was stirred under a hydrogen balloon for 30 h at room temperature, then it was filtered through a celite pad. The solution was neutralized with saturated NaHCO<sub>3</sub> and concentrated *in vacuo*. The crude residue was purified by Sephadex LH-20 (H<sub>2</sub>O) to give **76**<sup>[27]</sup> as a white amorphous solid (13 mg, 61%,  $\alpha/\beta = 1.4/1$ ); <sup>1</sup>H NMR (400 MHz, D<sub>2</sub>O)  $\delta$  5.16 (d,  $J = 2.4$  Hz, 0.60H, **H-1 $\alpha$** ), 4.67 (d,  $J = 7.5$  Hz, 0.40H, **H-1 $\beta$** ), 4.59 – 4.55 (m, 2H, **H-1'** and **H-1''**), 4.45 (d,  $J = 8.1$  Hz, 1H, **H-1'''**), 3.96 – 3.31 (m, 23H, 3H-2, 4H-3, 4H-4, 4H-5, 8H-6), 2.64 (t,  $J = 8.6$  Hz, 1H, H-2'''), 2.03 (s, 6H, 2N(C=O)CH<sub>3</sub>), 2.01 (s, 3H, N(C=O)CH<sub>3</sub>). <sup>13</sup>C NMR (150 MHz, D<sub>2</sub>O)  $\delta$  174.73, 174.60, 174.46, 102.77, 101.28, 94.84, 90.46, 79.60, 79.13, 79.02, 78.99, 78.01, 76.19, 75.60, 74.67, 74.59, 74.50, 72.47, 72.10, 71.98, 70.00, 69.55, 69.24, 60.63, 60.12, 60.05, 59.99, 59.93, 56.68, 56.12, 55.26, 55.06, 53.66, 22.17, 22.12, 21.88. HRMS (ESI) calcd for C<sub>30</sub>H<sub>52</sub>N<sub>4</sub>O<sub>20</sub>Na [M+Na]<sup>+</sup> 811.3067 found 811.3069.

### 2.5.3 Comparison of the analytical data of synthetic **76** with those reported for tetrasaccharide **76**

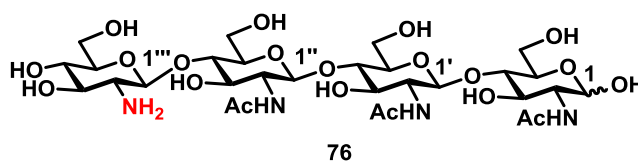

| Position     | <b>76</b> <sup>[27]</sup>     | Synthetic <b>76</b>           |
|--------------|-------------------------------|-------------------------------|
| H-1 $\alpha$ | 5.16 (d, $J = 1.2$ Hz, 0.60H) | 5.16 (d, $J = 2.4$ Hz, 0.60H) |
| H-1 $\beta$  | 4.67 (d, $J = 7.6$ Hz, 0.40H) | 4.67 (d, $J = 7.5$ Hz, 0.40H) |
| H-1'         | 4.59 – 4.55 (m, 2H)           | 4.59 – 4.55 (m, 2H)           |
| H-1''        |                               |                               |
| H-1'''       | 4.45 (d, $J = 8.2$ Hz, 1H)    | 4.45 (d, $J = 8.1$ Hz, 1H)    |
| 3H-2         |                               |                               |
| 4H-3         |                               |                               |
| 4H-4         | 3.95 – 3.30 (m, 23H)          | 3.96 – 3.31 (m, 23H)          |
| 4H-5         |                               |                               |
| 8H-6         |                               |                               |
| H-2'''       | 2.68 – 2.61 (m, 1H)           | 2.64 (t, $J = 8.6$ Hz, 1H)    |

|                                 |              |              |
|---------------------------------|--------------|--------------|
| 2AcNH( <u>CH</u> <sub>3</sub> ) | 2.03 (s, 6H) | 2.03 (s, 6H) |
| AcNH( <u>CH</u> <sub>3</sub> )  | 2.01 (s, 3H) | 2.01 (s, 3H) |

| Position       | 76 <sup>[27]</sup> | Synthetic 76 | Position                   | 76 <sup>[27]</sup> | Synthetic 76 |
|----------------|--------------------|--------------|----------------------------|--------------------|--------------|
| AcNH           | 174.7              | 174.73       |                            | 72.1               | 72.10        |
|                | 174.6              | 174.60       |                            | 72.0               | 71.98        |
| ( <u>C</u> =O) | 174.5              | 174.46       | pyranose                   | 70.0               | 70.00        |
| C-1'''         | 102.7              | 102.77       |                            | 69.6               | 69.55        |
| C-1'           | 101.3              | 101.28       |                            | 69.2               | 69.24        |
| C-1''          | 101.3              | 101.28       | C-6                        | 60.6               | 60.63        |
| C-1β           | 94.8               | 94.84        | C-6                        | 60.1               | 60.12        |
| C-1α           | 90.4               | 90.46        |                            | 60.1               | 60.05        |
|                | 79.6               | 79.60        | C-6                        | 60.0               | 59.99        |
|                | 79.2               | 79.13        | C-6                        | 59.9               | 59.93        |
|                | 79.0               | 79.02        | C-2'''                     | 56.7               | 56.68        |
|                | 79.0               | 78.99        | C-2'                       | 56.1               | 56.12        |
| pyranose       | 78.0               | 78.01        | C-2β                       | 55.3               | 55.26        |
|                | 76.2               | 76.19        | C-2''                      | 55.1               | 55.06        |
|                | 75.5               | 75.60        | C-2α                       | 53.6               | 53.66        |
|                | 74.7               | 74.67        | AcNH                       | 22.2               | 22.17        |
|                | 74.6               | 74.59        | ( <u>CH</u> <sub>3</sub> ) | 22.1               | 22.12        |
|                | 74.5               | 74.50        |                            | 21.9               | 21.88        |
|                | 72.5               | 72.47        |                            |                    |              |

## 2.6 Total synthesis of Capuramycin

### 2.6.1 Aglycon transfer issues of thioglycosides

*p*-Methylphenyl 6-O-benzyl-3-O-methyl-2-O-benzoyl-1-thio-β-L-talofuranoside (80)

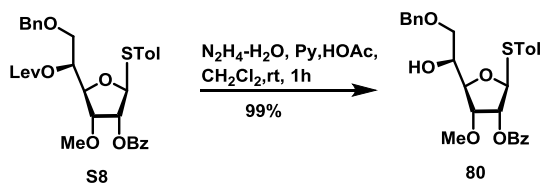

To a solution of compound **S8** (64 mg, 0.11 mmol) in 2 mL dry  $\text{CH}_2\text{Cl}_2$  was added 1 M hydrazine hydrate (220  $\mu\text{L}$ , 0.22 mmol, hydrazine hydrate/pyridine/AcOH = 125  $\mu\text{L}$ /1.4 mL/1 mL) at room temperature. The mixture was stirred at room temperature for 1 h. Then it was quenched with acetone and concentrated *in vacuo*. The resulting residue was purified by silica gel column chromatography (EtOAc/Petroleum ether = 1/3) to afford **80** (53 mg, 99%) as a colorless oil.  $R_f$  = 0.25 (EtOAc/Petroleum ether = 1/3).  $[\alpha]_{\text{D}}^{20}$  = -73.15 (c 0.16,  $\text{CHCl}_3$ ),  $^1\text{H}$  NMR (400 MHz,  $\text{CDCl}_3$ )  $\delta$  7.99 (d,  $J$  = 7.8 Hz, 2H), 7.49 (t,  $J$  = 7.2 Hz, 1H), 7.35 (dd,  $J$  = 16.7, 8.0 Hz, 4H), 7.30 – 7.21 (m, 5H), 7.04 (d,  $J$  = 7.8 Hz, 2H), 5.51 (t,  $J$  = 3.0 Hz, 1H, H-2), 5.43 (d,  $J$  = 2.5 Hz, 1H, **H-1**), 4.50 (dd,  $J$  = 12.0, 2.9 Hz, 2H,  $\text{CH}_2\text{-Bn}$ ), 4.15 – 4.09 (m, 2H, H-3 and H-6a), 3.82 (d,  $J$  = 6.5 Hz, 1H, H-4), 3.56 – 3.43 (m, 2H, H-5 and H-6b), 3.28 (s, 3H, OMe), 2.30 (d, 1H,  $J$  = 7.2 Hz, 1H, OH), 2.25 (s, 3H,  $\text{CH}_3\text{-STol}$ ).  $^{13}\text{C}$  NMR (100 MHz,  $\text{CDCl}_3$ )  $\delta$  165.47, 138.42, 138.00, 133.42, 132.97, 130.01, 129.92, 129.42, 128.77, 128.48, 128.43, 127.78, 127.72, 89.76, 82.46, 79.61, 73.41, 71.46, 69.48, 58.98, 21.18. HRMS (ESI) calcd for  $\text{C}_{28}\text{H}_{30}\text{O}_6\text{SNa}$   $[\text{M}+\text{Na}]^+$ : 517.1655, found: 517.1654.

***p*-Methylphenyl [6-*O*-(*tert*-butyldiphenylsilyl)-2,3,4-tri-acetyl- $\alpha$ -D-mannopyranosyl] (1 $\rightarrow$ 5)-6-*O*-benzyl-3-*O*-methyl-2-*O*-benzoyl-1-thio- $\beta$ -L-talofuranoside (**81**)**

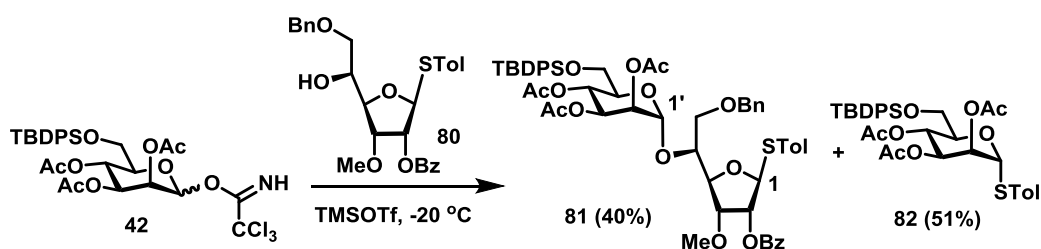

Donor **42**<sup>[23]</sup> (47 mg, 0.068 mmol) and thioglycoside acceptor **80** (28 mg, 0.057 mmol) were co-evaporated with dry toluene, dried *in vacuo* for 10 min, and dissolved in dry  $\text{CH}_2\text{Cl}_2$  (1 mL) in the presence of 4 Å powdered molecular sieves (100 mg) under Ar. After stirring at room temperature for 0.5 h, the solution was cooled to - 20 °C and TMSOTf (2.06  $\mu\text{L}$ , 0.011 mmol) was added. The resulting solution was kept stirring at - 20 °C for 40 min, and  $\text{Et}_3\text{N}$  was added to quench the reaction. The whole mixture was filtered through a

Celite pad and concentrated *in vacuo*. Purification by silica gel column chromatography (EtOAc/Petroleum ether =1/6) afforded **82** (19 mg, 51%) as a white solid and **81** (24 mg, 40%) as a white foam. The compound **82**:  $R_f = 0.45$  (EtOAc/Petroleum ether =1/5), the compound **81**:  $R_f = 0.35$  (EtOAc/Petroleum ether =1/5).

Data for **81**:  $[\alpha]_D^{20} = +3.26$  (c 0.16, CHCl<sub>3</sub>), <sup>1</sup>H NMR (400 MHz, CDCl<sub>3</sub>)  $\delta$  8.04 (d,  $J = 7.5$  Hz, 2H), 7.72 (d,  $J = 7.1$  Hz, 2H), 7.65 (d,  $J = 7.1$  Hz, 2H), 7.56 (t,  $J = 7.4$  Hz, 1H), 7.48 – 7.29 (m, 15H), 7.04 (d,  $J = 7.8$  Hz, 2H), 5.64 (t,  $J = 10.0$  Hz, 1H, H-4'), 5.52 – 5.44 (m, 2H, H-3' and H-2), 5.38 (s, 1H, H-2'), 5.37 (s, 1H, **H-1**), 5.24 (s, 1H, **H-1'**), 4.57 (d,  $J = 12.0$  Hz, 1H, CH<sub>2</sub>-Bn), 4.48 (d,  $J = 12.0$  Hz, 1H, 1H, CH<sub>2</sub>-Bn), 4.20 (d,  $J = 9.8$  Hz, 1H, H-5'), 4.11 – 4.01 (m, 2H, H-4, H-5), 3.98 – 3.93 (m, 1H, H-3), 3.80 (dd,  $J = 11.6, 1.9$  Hz, 1H, H-6'a), 3.72 – 3.55 (m, 3H, H-6'b, H-6a and H-6b), 3.20 (s, 3H, OMe), 2.28 (s, 3H, CH<sub>3</sub>-STol), 2.13 (s, 3H, CH<sub>3</sub>-OAc), 2.00 (s, 3H, CH<sub>3</sub>-OAc), 1.92 (s, 3H, CH<sub>3</sub>-OAc), 1.07 (s, 9H, CH<sub>3</sub>-TBDPS). <sup>13</sup>C NMR (100 MHz, CDCl<sub>3</sub>)  $\delta$  170.10, 169.42, 165.38, 137.91, 137.88, 135.87, 135.66, 133.57, 133.34, 133.24, 132.82, 129.89, 129.81, 129.56, 129.53, 129.41, 129.07, 128.44, 128.41, 127.74, 127.66, 127.59, 127.52, 97.11, 88.74, 81.65, 79.55, 76.19, 75.31, 73.43, 71.36, 70.11, 69.98, 69.83, 65.97, 61.99, 58.74, 26.73, 21.11, 20.92, 20.84, 20.74, 19.35. HRMS (ESI) calcd for C<sub>56</sub>H<sub>64</sub>O<sub>14</sub>SiNa [M+Na]<sup>+</sup>: 1043.3678, found: 1043.3671.

Data for **82**: <sup>1</sup>H NMR (400 MHz, CDCl<sub>3</sub>)  $\delta$  7.67 (t,  $J = 7.7$  Hz, 4H), 7.45 – 7.32 (m, 8H), 7.10 – 7.04 (m, 2H), 5.52 – 5.46 (m, 2H, H-4 and H-2), 5.45 – 5.42 (m, 1H, **H-1**), 5.30 (dd,  $J = 10.0, 3.1$  Hz, 1H, H-3), 4.43 – 4.35 (m, 1H, H-5), 3.81 (dd,  $J = 11.5, 4.7$  Hz, 1H, H-6a), 3.75 – 3.68 (m, 1H, H-6b), 2.32 (s, 3H, CH<sub>3</sub>-STol), 2.12 (s, 3H, CH<sub>3</sub>-OAc), 2.01 (s, 3H, CH<sub>3</sub>-OAc), 1.93 (s, 3H, CH<sub>3</sub>-OAc), 1.06 (s, 9H, CH<sub>3</sub>-TBDPS). <sup>13</sup>C NMR (100 MHz, CDCl<sub>3</sub>)  $\delta$  170.08, 170.04, 169.52, 137.99, 135.81, 135.60, 133.33, 132.97, 132.25, 129.90, 129.75, 129.68, 129.65, 127.69, 127.61, 86.14, 72.44, 71.32, 69.79, 66.33, 62.61, 26.67, 21.17, 20.92, 20.77, 20.69, 19.28. HRMS (ESI) calcd for C<sub>35</sub>H<sub>42</sub>O<sub>8</sub>SiNa [M+Na]<sup>+</sup>: 673.2262, found: 673.2264.

**[6-*O*-(*tert*-butyldiphenylsilyl)-2,3,4-tri-acetyl- $\alpha$ -D-mannopyranosyl] -**  
**(1 $\rightarrow$ 5)-(6-*O*-benzyl-3-*O*-methyl-2-*O*-benzoyl- $\beta$ -L-talofuranoyl) 2-(1-phenylvinyl) benzoate**  
**(83)**

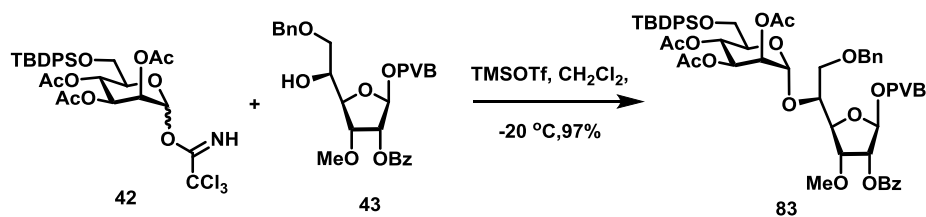

Donor **42**<sup>[23]</sup> (109 mg, 0.16 mmol) and glycosyl PVB acceptor **43** (79 mg, 0.133 mmol) were co-evaporated with dry toluene, dried *in vacuo* for 10 min, and dissolved in dry CH<sub>2</sub>Cl<sub>2</sub> (1.8 mL) in the presence of 4 Å powdered molecular sieves (180 mg) under Ar. After stirring at room temperature for 0.5 h, the solution was cooled to - 20 °C and TMSOTf (4.8 μL, 0.027 mmol) was added. The resulting solution was kept stirring at - 20 °C for 30 min, and Et<sub>3</sub>N was added to quench the reaction. The whole mixture was filtered through a Celite pad and concentrated *in vacuo*. Purification by silica gel column chromatography (EtOAc/Petroleum ether =1/3) afforded **83** (145 mg, 97%) as a white foam.  $R_f$  = 0.20 (EtOAc/Petroleum ether =1/3).  $[\alpha]_D^{20}$  = +21.44 (c 0.16, CHCl<sub>3</sub>), <sup>1</sup>H NMR (400 MHz, CDCl<sub>3</sub>) δ 7.94 (d,  $J$  = 7.8 Hz, 2H), 7.61 – 7.44 (m, 6H), 7.37 – 7.23 (m, 12H), 7.22 – 7.08 (m, 7H), 7.03 (d,  $J$  = 7.6 Hz, 1H), 6.90 (t,  $J$  = 7.6 Hz, 1H), 6.00 (s, 1H, CH<sub>2</sub>-PVB), 5.73 – 5.62 (m, 2H, CH<sub>2</sub>-PVB and H-4'), 5.33 (dd,  $J$  = 10.2, 3.3 Hz, 1H, H-3'), 5.22 (t,  $J$  = 2.6 Hz, 1H, H-2'), 5.15 (d,  $J$  = 1.9 Hz, 1H, **H-1**), 4.97 (d,  $J$  = 4.1 Hz, 1H, H-2), 4.84 (s, 1H, **H-1'**), 4.44 (d,  $J$  = 11.8 Hz, 1H, CH<sub>2</sub>-Bn), 4.38 (d,  $J$  = 11.8 Hz, 1H, CH<sub>2</sub>-Bn), 4.04 (d,  $J$  = 10.0 Hz, 1H, H-5'), 3.89 (t,  $J$  = 8.2 Hz, 1H, H-4), 3.78 – 3.69 (m, 1H, H-5), 3.59 (dd,  $J$  = 11.8, 2.4 Hz, 1H, H-6'a), 3.48 – 3.38 (m, 1H, H-6'b), 3.30 (d,  $J$  = 5.4 Hz, 2H, H-6a and H-6b), 3.22 (dd,  $J$  = 8.6, 4.2 Hz, 1H, H-3), 2.89 (s, 3H, OMe), 2.05 (s, 3H, CH<sub>3</sub>-OAc), 1.93 (s, 3H, CH<sub>3</sub>-OAc), 1.90 (s, 3H, CH<sub>3</sub>-OAc), 0.96 (s, 9H, CH<sub>3</sub>-TBDPS). <sup>13</sup>C NMR (100 MHz, CDCl<sub>3</sub>) δ 170.33, 170.21, 169.45, 165.73, 165.07, 148.30, 142.33, 139.54, 137.89, 135.75, 135.64, 133.64, 133.42, 133.20, 131.97, 130.73, 130.31, 129.92, 129.67, 129.55, 129.35, 129.12, 128.47, 127.95, 127.90, 127.81, 127.59, 127.56, 127.33, 126.71, 113.99, 98.50, 96.38, 81.16, 79.13, 73.65, 72.78, 70.86, 70.05, 69.95, 65.60, 61.68, 58.52, 26.66, 20.93, 20.91, 20.85, 19.29. HRMS (ESI) calcd for C<sub>64</sub>H<sub>68</sub>O<sub>16</sub>SiNa [M+Na]<sup>+</sup>: 1143.4169, found: 1143.4166.

## 2.6.2 One-pot glycosylation and the total synthesis of Compound 88

[6-*O*-(*tert*-butyldiphenylsilyl)-2,3,4-tri-acetyl- $\alpha$ -D-mannopyranosyl] -(1 $\rightarrow$ 5)-  
(6-*O*-benzyl-3-*O*-methyl-2-*O*-benzoyl- $\beta$ -L-talofuranoyl) uracil (**84**)

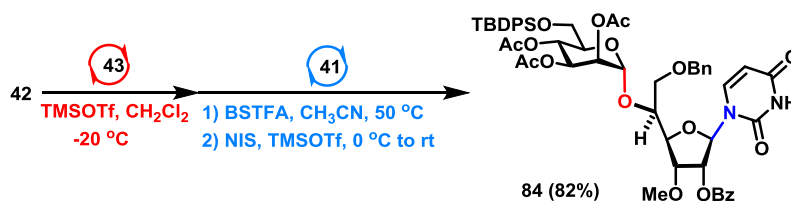

Bis(trimethylsilyl) trifluoroacetamide (BSTFA) (98  $\mu$ L, 0.372 mmol) was added to a stirred suspension of acceptor **41** (14 mg, 0.124 mmol) in dry  $\text{CH}_3\text{CN}$  (1.2 mL) under Ar. The mixture was stirred at 50  $^\circ\text{C}$  for 30 min to prepare silylated uracil

Mannosyl trichloroacetimidate **42**<sup>[23]</sup> (51 mg, 0.075 mmol) and glycosyl PVB acceptor **43** (37 mg, 0.062 mmol) were co-evaporated with dry toluene, dried *in vacuo* for 10 min, and dissolved in dry  $\text{CH}_2\text{Cl}_2$  (1.2 mL) in the presence of 3 Å powdered molecular sieves (240 mg) under Ar. After stirring at room temperature for 0.5 h, then cooled to -20  $^\circ\text{C}$  and TMSOTf (2.2  $\mu$ L, 0.012 mmol) was added. The resulting solution was kept stirring at -20  $^\circ\text{C}$  for 30 min, then the reaction mixture was warmed to 0  $^\circ\text{C}$ , to which was added the above fresh prepared silylated uracil solution and stirred at 0  $^\circ\text{C}$  for another 10 min. Then NIS (21 mg, 0.093 mmol) and TMSOTf (4  $\mu$ L, 0.022 mmol) were added, the reaction mixture was stirred for 3 h after the temperature gradually rise to room temperature.  $\text{Et}_3\text{N}$  was added to quench the reaction. The whole mixture was filtered through a Celite pad and concentrated *in vacuo*. Purification by silica gel column chromatography ( $\text{EtOAc}$ /Petroleum ether =1/1) afforded **84** (51 mg, 82%) as a white foam.  $R_f$  = 0.20 ( $\text{EtOAc}$ /Petroleum ether =1/1).  $[\alpha]_D^{20}$  = +22.58 (c 0.10,  $\text{CHCl}_3$ ),  $^1\text{H}$  NMR (400 MHz,  $\text{CDCl}_3$ )  $\delta$  8.79 (s, 1H, NH), 8.02 (d,  $J$  = 7.5 Hz, 2H), 7.71 (d,  $J$  = 6.8 Hz, 2H), 7.67 (d,  $J$  = 6.8 Hz, 2H), 7.59 (dd,  $J$  = 17.4, 7.9 Hz, 2H), 7.47 – 7.30 (m, 13H), 6.25 (d,  $J$  = 5.1 Hz, 1H, **H-1**), 6.00 (d,  $J$  = 8.1 Hz, 1H, H-pyrimidine), 5.59 (t,  $J$  = 10.0 Hz, 1H, H-4'), 5.41 – 5.35 (m, 2H, H-2 and H-2'), 5.33 (d,  $J$  = 1.9 Hz, 1H, H-1'), 5.29 – 5.25 (m, 1H, H-3'), 4.60 (d,  $J$  = 11.9 Hz, 1H,  $\text{CH}_2$ -Bn), 4.55 (d,  $J$  = 11.9 Hz, 1H,  $\text{CH}_2$ -Bn), 4.28 (dd,  $J$  = 4.7, 2.2 Hz, 1H, H-4), 4.17 – 4.13 (m, 1H, H-5), 4.10 – 4.04 (m, 2H, H-3 and H-5'), 3.85 – 3.71 (m, 4H, H-4, H-6 and H-6'), 3.17 (s, 3H, OMe), 2.13 (s, 3H,  $\text{CH}_3$ -OAc), 2.01 (s, 3H,  $\text{CH}_3$ -OAc), 1.99 (s, 3H,  $\text{CH}_3$ -OAc), 1.07 (s, 9H,  $\text{CH}_3$ -TBDPS).  $^{13}\text{C}$  NMR



(100 MHz, CDCl<sub>3</sub>)  $\delta$  170.24, 170.03, 169.45, 165.25, 162.95, 150.15, 139.17, 137.50, 135.78, 135.64, 133.58, 133.30, 133.16, 129.96, 129.71, 129.66, 128.89, 128.54, 128.50, 127.91, 127.86, 127.68, 127.58, 103.89, 97.28, 86.74, 82.16, 75.26, 74.44, 73.69, 72.47, 70.15, 69.67, 69.54, 65.39, 62.32, 58.73, 26.73, 20.85, 20.77, 19.37. HRMS (ESI) calcd for C<sub>53</sub>H<sub>60</sub>N<sub>2</sub>O<sub>16</sub>SiNa [M+Na]<sup>+</sup>: 1031.3604, found: 1031.3604.

**[6-*O*-(*tert*-butyldiphenylsilyl)-2,3,4-tri-acetyl- $\alpha$ -D-mannopyranosyl]-(1 $\rightarrow$ 5)-  
(3-*O*-methyl-2-*O*-benzoyl- $\beta$ -L-talofuranoyl) uracil (**84-1**)**

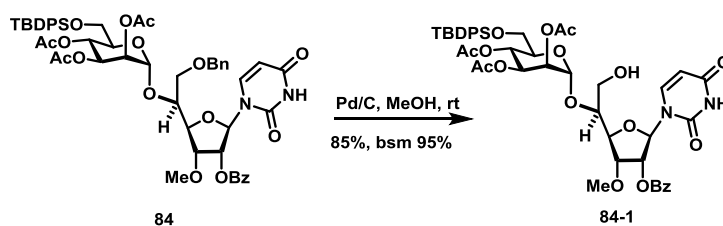

To a solution of compound **84** (200 mg, 0.198 mmol) in 20 mL MeOH was added 210 mg 10% palladium / carbon at room temperature under hydrogen balloon. The mixture was stirred vigorously at room temperature for 48 h. The mixture was filtered through a Celite pad and concentrated *in vacuo*. Purification by silica gel column chromatography (CH<sub>2</sub>Cl<sub>2</sub>/MeOH =30/1) afforded **84-1** (154 mg, 85%) as a white solid and recovered starting material **84** (20 mg, 10%).  $R_f$  = 0.25 (CH<sub>2</sub>Cl<sub>2</sub>/MeOH =30/1).  $[\alpha]_D^{20}$  = +9.22 (c 0.11, CHCl<sub>3</sub>). <sup>1</sup>H NMR (400 MHz, CDCl<sub>3</sub>)  $\delta$  8.74 (s, 1H), 8.04 (d,  $J$  = 7.8 Hz, 2H), 7.70 (d,  $J$  = 6.9 Hz, 2H), 7.66 (d,  $J$  = 6.8 Hz, 2H), 7.58 (d,  $J$  = 8.0 Hz, 2H), 7.48 – 7.34 (m, 8H), 6.15 (d,  $J$  = 4.4 Hz, 1H, **H-1**), 5.93 (d,  $J$  = 7.1 Hz, 1H, H-pyrimidine), 5.58 (t,  $J$  = 9.9 Hz, 1H, H-4'), 5.48 (t,  $J$  = 4.8 Hz, 1H, H-2), 5.37 (s, 1H, **H-1'**), 5.31 (dd,  $J$  = 10.1, 3.2 Hz, 1H, H-3'), 5.28 – 5.23 (m, 1H, H-2'), 4.31 (dd,  $J$  = 5.7, 2.7 Hz, 1H, H-4), 4.13 (t,  $J$  = 5.3 Hz, 1H, H-3), 4.08 – 3.99 (m, 2H, H-5 and H-5'), 3.97 – 3.91 (m, 2H, H-6), 3.83 – 3.71 (m, 2H, H-6'), 3.25 (s, 3H, OMe), 2.54 (s, 1H, OH), 2.15 (s, 3H, CH<sub>3</sub>-OAc), 2.02 (s, 3H, CH<sub>3</sub>-OAc), 1.98 (s, 3H, CH<sub>3</sub>-OAc), 1.07 (s, 9H, CH<sub>3</sub>-TBDPS). <sup>13</sup>C NMR (100 MHz, CDCl<sub>3</sub>)  $\delta$  170.39, 170.33, 169.42, 165.31, 162.84, 150.03, 139.51, 135.77, 135.62, 133.65, 133.23, 133.08, 129.96, 129.74, 129.70, 128.86, 128.56, 127.69, 127.60, 103.74, 96.50, 88.03, 82.44, 78.43, 76.24, 74.10, 72.45, 26.70, 20.88, 20.76, 20.74, 19.34. HRMS (ESI) calcd for C<sub>46</sub>H<sub>54</sub>N<sub>2</sub>O<sub>16</sub>SiNa [M+Na]<sup>+</sup>: 941.3135, found: 941.3130.

**[6-*O*-(*tert*-butyldiphenylsilyl)-2,3,4-tri-acetyl- $\alpha$ -D-mannopyranosyl]-(1 $\rightarrow$ 5)-(5-acetamide-3-*O*-methyl-2-*O*-benzoyl- $\beta$ -L-talofuranoyl) uracil (**85**)**

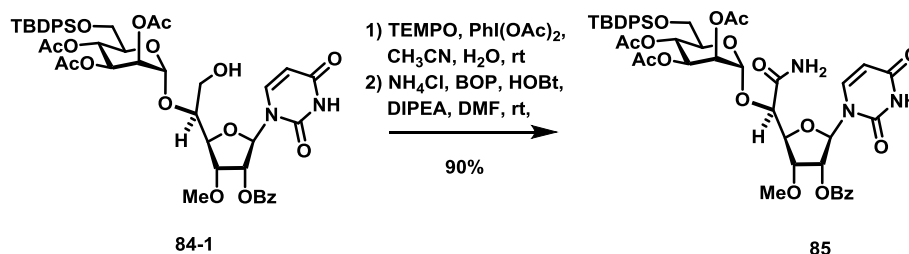

Compound **84-1** (110 mg, 0.119 mmol) was dissolved in 2 mL CH<sub>3</sub>CN and 2 mL H<sub>2</sub>O, then (diacetoxyiodo)benzene (115 mg, 0.357 mmol) and 2,2,6,6-tetramethylpiperidinoxy (TEMPO) (3.8 mg, 0.024 mmol) were added at room temperature. The mixture was stirred vigorously at room temperature for 6 h, then concentrated *in vacuo* to give the light yellow solid. Then to a solution of the above crude in 3 mL anhydrous DMF was added 1-*H*-benzotriazol-1-yloxytris(dimethylamino)phosphonium hexafluorophosphate (BOP) (93.5 mg, 0.178 mmol), 1-hydroxybenzotriazole (HOBt) (24 mg, 0.178 mmol), NH<sub>4</sub>Cl (16 mg, 0.297 mmol) and *N,N*-diisopropylethylamine (15  $\mu$ L, 0.476 mmol) at room temperature under Ar. The mixture was stirred at room temperature for another 2 h. Then it was concentrated *in vacuo* to give the light yellow solid. Purification by silica gel column chromatography (CH<sub>2</sub>Cl<sub>2</sub>/MeOH =30/1) afforded **85** (100 mg, 90%) as a white solid.  $R_f$  = 0.23 (CH<sub>2</sub>Cl<sub>2</sub>/MeOH =30/1).  $[\alpha]_D^{20}$  = +4.29 (c 0.09, CHCl<sub>3</sub>). <sup>1</sup>H NMR (400 MHz, CDCl<sub>3</sub>)  $\delta$  9.00 (s, 1H), 8.03 (d,  $J$  = 7.5 Hz, 2H), 7.68 (d,  $J$  = 7.6 Hz, 2H), 7.65 (d,  $J$  = 6.7 Hz, 2H), 7.58 (t,  $J$  = 7.4 Hz, 1H), 7.54 (d,  $J$  = 8.1 Hz, 1H), 7.48 – 7.34 (m, 8H), 6.65 (s, 1H, NH- amide), 6.17 – 6.05 (m, 2H, **H-1** and NH- amide), 5.92 (d,  $J$  = 8.2 Hz, 1H, H-pyrimidine), 5.64 (t,  $J$  = 9.9 Hz, 1H, H-4'), 5.51 – 5.45 (t,  $J$  = 2.6 Hz, 2H, H-2 and H-2'), 5.33 (dd,  $J$  = 9.9, 3.3 Hz, 1H, H-3'), 5.03 (d,  $J$  = 1.6 Hz, 1H, **H-1'**), 4.51 – 4.41 (m, 2H, H-4 and H-5), 4.18 (t,  $J$  = 5.6 Hz, 1H, H-3), 3.99 (dd,  $J$  = 9.9, 3.0 Hz, 1H, H-5'), 3.78 (s, 2H, H-6'), 3.19 (s, 3H, OMe), 2.16 (s, 3H, CH<sub>3</sub>-OAc), 2.04 (s, 3H, CH<sub>3</sub>-OAc), 2.02 (s, 3H, CH<sub>3</sub>-OAc), 1.07 (s, 9H, CH<sub>3</sub>-TBDPS). <sup>13</sup>C NMR (100 MHz, CDCl<sub>3</sub>)  $\delta$  170.72, 170.65, 170.40, 169.25, 165.33, 162.92, 149.98, 139.67, 135.71, 135.62, 133.71, 133.15, 132.89, 129.96, 129.82, 129.78, 128.76, 128.58, 127.72, 127.70, 103.78, 96.95, 88.17, 81.87, 77.77, 75.89, 73.80, 72.77, 69.55, 69.20,

65.10, 61.87, 58.66, 26.72, 20.81, 20.76, 19.35. HRMS (ESI) calcd for  $C_{46}H_{52}N_3O_{16}SiNa$   $[M-H]^-$ : 930.3122, found: 930.3125.

**(2,3,4-Tri-acetyl- $\alpha$ -D-mannopyranosyl)-(1 $\rightarrow$ 5)-(5-acetamide-3-O-methyl-2-O-benzoyl- $\beta$ -L-talofuranoyl) uracil (**85-1**)**

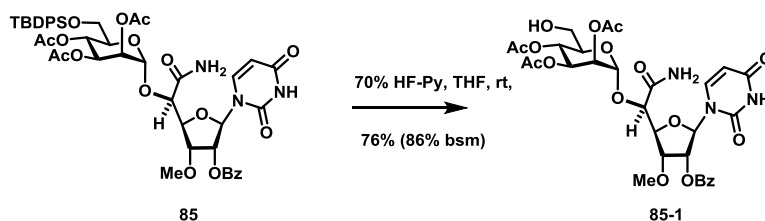

To a solution of compound **85** (120 mg, 0.129 mmol) in 2 mL THF was added 70% HF pyridine (166  $\mu$ L, 1.29 mmol) at room temperature. The mixture was stirred vigorously at room temperature for 10 h, then it was quenched with  $NaHCO_3$ , filtered and concentrated. The resulting residue was purified by silica gel column chromatography ( $CH_2Cl_2/MeOH = 30/1$ ) to afford **85-1** (50 mg, 56%) as a white solid and recover starting material **85** (35 mg, 29%). Resubjection of **85** (35 mg, 0.037 mmol) to the reaction conditions produced another 19 mg (21%) of **85-1** (total 76%) and recovered starting material **85** (12 mg, 10%).  $R_f = 0.28$  ( $CH_2Cl_2/MeOH = 15/1$ ).  $[\alpha]_D^{20} = +13.14$  (c 0.12,  $CHCl_3$ ),  $^1H$  NMR (400 MHz,  $CDCl_3$ )  $\delta$  9.19 (s, 1H), 8.05 (d,  $J = 7.6$  Hz, 2H), 7.60 (t,  $J = 7.3$  Hz, 1H), 7.55 (d,  $J = 7.8$  Hz, 1H), 7.46 (t,  $J = 7.6$  Hz, 2H), 6.81 (s, 1H, NH-amide), 6.24 (s, 1H, NH-amide), 6.02 (d,  $J = 3.2$  Hz, 1H, **H-1**), 5.95 (d,  $J = 7.8$  Hz, 1H, H-pyrimidine), 5.55 (t,  $J = 4.6$  Hz, 1H, H-3'), 5.50 (s, 1H, H-2), 5.37 (dd,  $J = 9.8, 3.3$  Hz, 1H, H-2'), 5.27 (t,  $J = 9.8$  Hz, 1H, H-4'), 5.04 (s, 1H, **H-1'**), 4.50 (s, 1H, H-4), 4.47 (d,  $J = 5.8$  Hz, 1H, H-5), 4.34 (t,  $J = 5.0$  Hz, 1H, H-3), 4.00 (dd,  $J = 9.2, 4.6$  Hz, 1H, H-5'), 3.70 (s, 2H, H-6'), 3.37 (s, 3H, OMe), 2.16 (s, 3H,  $CH_3-OAc$ ), 2.11 (s, 3H,  $CH_3-OAc$ ), 2.03 (s, 3H,  $CH_3-OAc$ ).  $^{13}C$  NMR (100 MHz,  $CDCl_3$ )  $\delta$  171.09, 170.48, 170.40, 170.36, 165.49, 163.57, 150.29, 140.35, 133.73, 129.98, 128.76, 128.60, 103.57, 96.78, 88.74, 82.12, 77.87, 76.13, 73.97, 72.62, 69.10, 65.87, 61.43, 58.83, 20.83, 20.79, 20.69. HRMS (ESI) calcd for  $C_{30}H_{35}N_3O_{16}Na$   $[M+Na]^+$ : 716.1910, found: 716.1913.

Chemical reaction scheme showing the conversion of compound **85-1** to compound **86**. Compound **85-1** is a complex molecule with a pyrimidine ring, a furanose ring, and a sugar moiety. It reacts with TPAP, NMO, and CH<sub>2</sub>Cl<sub>2</sub> at room temperature to form compound **86**, which is a similar molecule but with a different sugar moiety. The reaction is labeled with 70% (90% bsm) yield.

To a solution of compound **85-1** (55 mg, 0.079 mmol) in 1.4 mL CH<sub>2</sub>Cl<sub>2</sub> was added 4 Å powdered molecular sieves (140 mg), 4-methylmorpholine N-oxide (NMO) (90 μL, 0.437 mmol) at room temperature under Ar. The mixture was stirred at room temperature for 20 min, then tetrapropylammonium perruthenate (TPAP) (10 mg, 0.028 mmol) was added. This solution was kept stirring at room temperature for 6 h, filtered through a Celite pad and concentrated *in vacuo*. Purification by silica gel column chromatography (CH<sub>2</sub>Cl<sub>2</sub>/MeOH =35/1) afforded **86** (27 mg, 55%) as a white solid and recovered starting material **85-1** (20 mg, 36%). Resubjection of **85-1** (20 mg, 0.028 mmol) to the reaction conditions produced another 8 mg (15%) of **86** (total 70%) and recovered starting material **85-1** (11 mg, 20%). R<sub>f</sub> = 0.26 (CH<sub>2</sub>Cl<sub>2</sub>/MeOH =20/1). [α]<sub>D</sub><sup>20</sup> = +26.86 (c 0.11, CHCl<sub>3</sub>), <sup>1</sup>H NMR (400 MHz, CDCl<sub>3</sub>) δ 9.37 (s, 1H, NH), 9.33 (s, 1H, H-CHO), 8.02 (d, *J* = 7.6 Hz, 2H), 7.57 (t, *J* = 7.2 Hz, 1H), 7.50 (d, *J* = 8.0 Hz, 1H), 7.44 (t, *J* = 7.6 Hz, 2H), 7.10 (s, 1H, NH-amide), 6.48 (s, 1H, NH-amide), 6.03 (s, 2H, **H-1** and H-4'), 5.94 (s, 1H, H-3'), 5.88 (d, *J* = 8.0 Hz, 1H, H-pyrimidine), 5.68 (s, 1H, H-2'), 5.38 (d, *J* = 2.8 Hz, 1H, **H-1'**), 5.31 (t, *J* = 4.8 Hz, 1H, H-2), 4.64 (s, 1H, H-5), 4.60 – 4.53 (m, 1H, H-4), 4.05 – 3.99 (m, 1H, H-3), 3.29 (s, 3H, OMe), 2.11 (s, 3H, CH<sub>3</sub>-OAc), 2.10 (s, 3H, CH<sub>3</sub>-OAc). <sup>13</sup>C NMR (100 MHz, CDCl<sub>3</sub>) δ 185.25, 170.44, 170.21, 169.95, 165.48, 163.23, 150.14, 149.09, 140.25, 133.73, 129.98, 128.70, 128.58, 118.08, 103.58, 96.97, 82.30, 77.93, 74.07, 64.92, 64.22, 62.95, 59.01, 54.21, 44.83, 20.66, 20.65. HRMS (ESI) calcd for C<sub>28</sub>H<sub>29</sub>N<sub>3</sub>O<sub>14</sub>Na [M+Na]<sup>+</sup>: 654.1542, found: 654.1546.

## S64

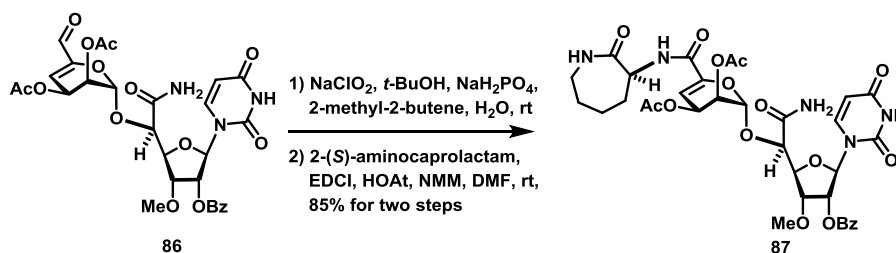

To a solution of the aldehyde **86** (21 mg, 0.033 mmol) in *t*-BuOH (1.68 mL) and 2-methyl-2-butene (1.34 mL) was added a solution of NaH<sub>2</sub>PO<sub>4</sub> (24 mg, 0.20 mmol) and NaClO<sub>2</sub> (18 mg, 0.20 mmol) in H<sub>2</sub>O (1.7 mL) at room temperature. The mixture was vigorously stirred at room temperature for 4 h, then concentrated *in vacuo* to produce a yellow solid. Washed the solid with MeOH and concentrated to give the light yellow crude. The above crude was dissolved in 1.7 mL anhydrous DMF, then 2-(S)-aminocaprolactam (17 mg, 0.1 mmol), 1-hydroxy-7-azabenzotriazole (HOAt) (12.6 mg, 0.099 mmol), EDCI (18.9 mg, 0.099 mmol), 4-methylmorpholine (NMM) (23  $\mu$ L, 0.198 mmol) were added at room temperature under Ar. The mixture was stirred at room temperature for 6 h and concentrated *in vacuo*. The resulting residue was purified by silica gel column chromatography (CH<sub>2</sub>Cl<sub>2</sub>/MeOH = 30/1) to afford **87** (21 mg, 85% over two steps) as a white solid.  $R_f$  = 0.30 (CH<sub>2</sub>Cl<sub>2</sub>/MeOH = 20/1).  $[\alpha]_D^{20}$  = +60.47 (c 0.09, CHCl<sub>3</sub>), <sup>1</sup>H NMR (400 MHz, Chloroform-*d*)  $\delta$  9.77 (s, 1H), 8.12 – 8.01 (m, 3H), 7.80 (s, 1H), 7.57 (t, *J* = 7.4 Hz, 1H), 7.51 – 7.42 (m, 3H), 7.32 (s, 1H), 6.45 (s, 1H), 6.06 (d, *J* = 3.6 Hz, 1H, H-4'), 5.89 (d, *J* = 8.2 Hz, 1H, H-pyrimidine), 5.85 (s, 1H, **H-1**), 5.70 (t, *J* = 4.1 Hz, 1H, H-3'), 5.58 (s, 2H, H-2 and **H-1'**), 5.35 (d, *J* = 4.7 Hz, 1H, H-2'), 4.65 – 4.57 (m, 2H, CH-aminocaprolactam and H-5), 4.56 – 4.51 (m, 1H, H-4), 4.22 (s, 1H, H-3), 3.26 (s, 5H, OMe and CH<sub>2</sub>-aminocaprolactam), 2.12 (s, 3H, CH<sub>3</sub>-OAc), 2.05 (s, 3H, CH<sub>3</sub>-OAc), 2.00 (m, 2H, CH<sub>2</sub>-aminocaprolactam), 1.86 – 1.74 (m, 2H, CH<sub>2</sub>-aminocaprolactam), 1.60 – 1.48 (m, 1H, CH<sub>2</sub>-aminocaprolactam), 1.44 – 1.35 (m, 1H, CH-aminocaprolactam). <sup>13</sup>C NMR (150 MHz, CDCl<sub>3</sub>)  $\delta$  176.03, 170.51, 170.02, 165.37, 163.30, 158.75, 150.60, 144.44, 133.62, 130.03, 128.86, 128.54, 103.47, 97.99, 81.74, 73.61, 62.92, 58.95, 51.76, 42.14, 31.41, 29.70, 28.45, 27.92, 20.76, 20.70. HRMS (ESI) calcd for C<sub>34</sub>H<sub>38</sub>N<sub>5</sub>O<sub>15</sub>Na [M - H]<sup>+</sup>: 756.2370, found: 756.2370.

## Capuramycin 88

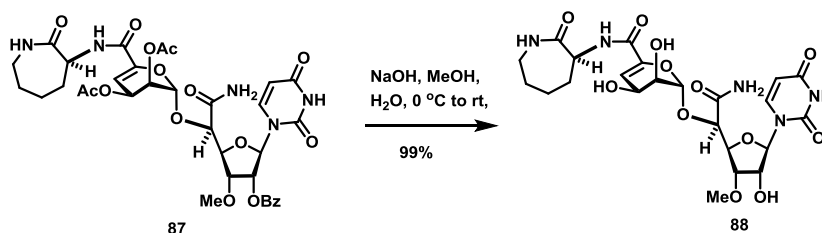

To a solution of **87** (7 mg, 0.009 mmol) in MeOH (0.8 mL) was added a solution of NaOH (1.1 mg, 0.027 mmol) in H<sub>2</sub>O (0.4 mL) at 0 °C. The mixture was stirred at 0 °C for 30 min, then it was warmed to room temperature and stirred for another 2.5 h. The solution was quenched with AcOH (3  $\mu$ L) and concentrated *in vacuo*. The resulting residue was purified by a Sephadex LH-20 (CHCl<sub>2</sub>/MeOH = 1/1) to afford **88**<sup>[28]</sup> (5 mg, 99%) as a white solid.  $R_f$  = 0.10 (CH<sub>2</sub>Cl<sub>2</sub>/MeOH = 8/1).  $[\alpha]_D^{20}$  = +85.33 (c 0.09, H<sub>2</sub>O), <sup>1</sup>H NMR (400 MHz, D<sub>2</sub>O)  $\delta$  7.76 (d,  $J$  = 8.1 Hz, 1H), 6.07 – 6.00 (m, 1H), 5.87 (d,  $J$  = 8.1 Hz, 1H), 5.77 (d,  $J$  = 3.4 Hz, 1H), 5.40 (d,  $J$  = 3.4 Hz, 1H), 4.77 (d,  $J$  = 2.6 Hz, 1H), 4.64 (dd,  $J$  = 11.2, 1.8 Hz, 1H), 4.52 (dd,  $J$  = 4.5, 2.7 Hz, 1H), 4.49 (dd,  $J$  = 6.3, 2.4 Hz, 1H), 4.40 (t,  $J$  = 4.2 Hz, 1H), 4.21 (t,  $J$  = 3.2 Hz, 1H), 3.76 (t,  $J$  = 5.7 Hz, 1H), 3.31 (s, 3H), 3.34 – 3.24 (m, 2H), 2.06 – 1.90 (m, 2H), 1.87 – 1.73 (m, 2H), 1.69 – 1.58 (m, 1H), 1.33 – 1.43 (m, 1H). <sup>13</sup>C NMR (150 MHz, D<sub>2</sub>O)  $\delta$  176.41, 173.15, 166.26, 161.60, 151.41, 141.68, 141.20, 109.55, 101.95, 99.48, 90.28, 81.77, 78.25, 75.67, 72.06, 64.91, 62.01, 57.97, 52.39, 41.54, 30.46, 27.74, 27.53. <sup>13</sup>C NMR (150 MHz, D<sub>2</sub>O)  $\delta$  176.41, 173.15, 166.26, 161.60, 151.41, 141.68, 141.20, 109.55, 101.95, 99.48, 90.28, 81.77, 78.25, 75.67, 72.06, 64.91, 62.01, 57.97, 52.39, 41.54, 30.46, 27.74, 27.53. HRMS (ESI) calcd for C<sub>23</sub>H<sub>31</sub>N<sub>5</sub>O<sub>12</sub>Na [M+Na]<sup>+</sup>: 592.1861, found: 592.1863.

### 2.6.3 Comparison of the analytical data of Capuramycin and Synthetic 88

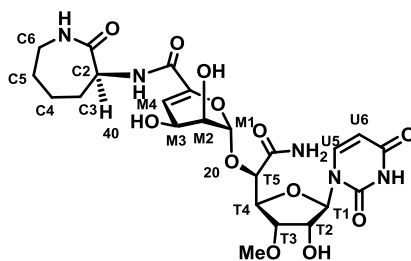

| Position | Capuramycin <sup>[28]</sup> | Synthetic 88                    |
|----------|-----------------------------|---------------------------------|
| U5       | 7.76 (d, 8.0)               | 7.76 (d, 8.1)                   |
| M4       | 6.01 (dd, 1.6, 2.4 )        | 6.07 – 6.00 (m)                 |
| U6       | 5.87 (d, 8.0)               | 5.87 (d, 8.1)                   |
| T1       | 5.77 (d, 3.2 )              | 5.77 (d, 3.4)                   |
| M1       | 5.40 (d, 3.2 )              | 5.40 (d, 3.4)                   |
| T5       | 4.76 (d, 2.0)               | 4.77 (d, 2.6)                   |
| C2       | 4.64 (d, 11.2)              | 4.64 (dd, 11.2, 1.8 )           |
| M3       | 4.52 (dd, 2.4, 8.0)         | 4.52 (dd, 4.5, 2.7 )            |
| T4       | Missing                     | 4.49 (dd, 6.3, 2.4)             |
| T2       | 4.39 (dd, 3.2, 4.8)         | 4.40 (t, 4.2 )                  |
| M2       | 4.20 (dd, 3.2, 6.4)         | 4.21 (t, 3.2)                   |
| T3       | 3.75 (t, 4.8 )              | 3.76 (t, 5.7)                   |
| OMe      | 3.31 (s)                    | 3.31(s)                         |
| C6       | 3.29 (s)                    | 3.34 - 3.24 (m)                 |
| C3       | 2.02-1.90 (m)               | 2.06 -1.90 (m)                  |
| C4       | 1.87- 1.73 (m)              | 1.87 - 1.73 (m)                 |
| C5       | 1.65 (m), 1.39 (m, 1H)      | 1.69 - 1.58 (m), 1.43- 1.33 (m) |

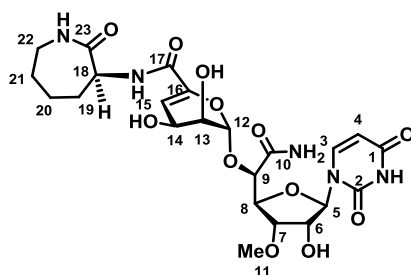

| Position | Capuramycin <sup>[28]</sup> | Synthetic 88 | Position | Capuramycin <sup>[28]</sup> | Synthetic 88 |
|----------|-----------------------------|--------------|----------|-----------------------------|--------------|
| C-23     | 176.4                       | 176.41       | C-7      | 78.2                        | 78.25        |
| C-10     | 173.2                       | 173.15       | C-9      | 75.7                        | 75.67        |
| C-1      | 166.3                       | 166.26       | C-6      | 72.0                        | 72.06        |
| C-17     | 161.6                       | 161.60       | C-13     | 64.9                        | 64.91        |
| C-2      | 151.4                       | 151.41       | C-14     | 62.0                        | 62.01        |
| C-16     | 141.7                       | 141.68       | C-11     | 58.0                        | 57.97        |
| C-3      | 141.2                       | 141.20       | C-18     | 52.4                        | 52.39        |
| C-15     | 109.6                       | 109.55       | C-22     | 41.5                        | 41.54        |
| C-4      | 102.0                       | 101.95       | C-21     | 30.4                        | 30.46        |
| C-12     | 99.5                        | 99.48        | C-20     | 27.7                        | 27.74        |
| C-5      | 90.3                        | 90.28        | C-19     | 27.5                        | 27.53        |
| C-8      | 81.8                        | 81.77        |          |                             |              |

### 3 References

- [1] B. Liu, F. Zhang, Y. Zhang, G. Liu, *Organic & Biomolecular Chemistry*. **2014**, 12, 1892-1896.
- [2] Y.-H. Wang, H.-W. Yeh, H.-W. Wang, C.-C. Yu, J.-H. Guh, D.-Z. Liu, P.-H. Liang, *Carbohydrate Research*. **2013**, 375, 118-135.
- [3] B. Yu, H. Tao, *The Journal of Organic Chemistry*. **2002**, 67, 9099-9102.
- [4] J. Yu, J. Sun, Y. Niu, R. Li, J. Liao, F. Zhang, B. Yu, *Chemical Science*. **2013**, 4, 3899-3905.
- [5] M. N. Kamat, A. V. Demchenko, *Organic Letters*. **2005**, 7, 3215-3218.
- [6] A. V. Demchenko, P. Pornsuriyasak, C. De Meo, N. N. Malysheva, *Angewandte Chemie-International Edition*. **2004**, 43, 3069-3072.
- [7] P. Li, H. He, Y. Zhang, R. Yang, L. Xu, Z. Chen, Y. Huang, L. Bao, G. Xiao, *Nature Communications*. **2020**, 11, 10.



- [8] X. F. Huang, L. J. Huang, H. S. Wang, X. S. Ye, *Angewandte Chemie-International Edition*. **2004**, 43, 5221-5224.
- [9] Y. Zhang, G. Xiang, S. He, Y. Hu, Y. Liu, L. Xu, G. Xiao, *Organic Letters* **2019**, 21, 2335-2339.
- [10] P. Li, H. He, X. L. Xu, Yi. Huang, Z. Chen, Y. Zhang, R. Yang, G. Xiao, *Green Synthesis and Catalysis*. **2020**, DOI: 10.1016/j.gresc.2020.10.003
- [11] H. Gold, R. G. Boot, J. M. F. G. Aerts, H. S. Overkleeft, J. D. C. Codee, G. A. van der Marel, *European Journal of Organic Chemistry*. **2011**, 2011, 1652-1663.
- [12] S. S. Shivatare, S.-H. Chang, T.-I. Tsai, C.-T. Ren, H.-Y. Chuang, L. Hsu, C.-W. Lin, S.-T. Li, C.-Y. Wu, C.-H. Wong, *Journal of the American Chemical Society*. **2013**, 135, 15382-15391.
- [13] M.-j. Xia, W. Yao, X.-b. Meng, Q.-h. Lou, Z.-j. Li, *Tetrahedron Letters*. **2017**, 58, 2389-2392.
- [14] S. J. Ge, Y. H. Tu, J. H. Xia, J. S. Sun, *European Journal of Organic Chemistry*. **2017**, 2017, 3929-3934.
- [15] R. Shen, S. Laval, X. Cao, B. Yu. *The Journal of Organic Chemistry*. **2018**, 83, 2601–2610
- [16] A. Pastore, M. Adinolfi, A. Iadonisi, S. Valerio, *European Journal of Organic Chemistry*. **2010**, 2010, 711-718
- [17] T. K. Kotamagari, R. G. Gonnade, A. K. Bhattacharya, *Organic Letters*. **2017**, 19, 3564-3567.
- [18] H. Tanaka, Y. Iwata, D. Takahashi, M. Adachi, T. Takahashi, *Journal of the American Chemical Society*. **2005**, 127, 6, 1630–1631
- [19] R. Hevey, C.-C. Ling, *Carbohydrate Research*. **2017**, 445, 65-74.
- [20] M. Kurosu, K. Li, *The Journal of Organic Chemistry*. **2008**, 73, 9767–9770
- [21] S. Knapp, S. R. Nandan, *The Journal of Organic Chemistry*. **1994**, 59, 281-283.
- [22] Y. Okada, O. Nagata, M. Taira, H. Yamada, *Organic Letters*. **2007**, 9, 15, 2755–2758
- [23] J. K. Fairweather, T. Karoli, V. Ferro, *Bioorganic & Medicinal Chemistry*. **2004**, 12, 6063-6075.
- [24] S. Dey, S.O. Bajaj, T. Tsai, H.-J. L. K. Wu, C.-H W. *Tetrahedron*. **2018**, 75, 6003-6011
- [25] S.S. Shivatare, S.H Chang, T.-I Tsai, C.-T Ren, H.-Y Chuang, L. Hsu, C.-W Lin, S.-T Li, C.-Y, Wu, C.-H Wong. *Journal of the American Chemical Society*. **2013**, 135, 15382–15391.
- [26] P. Boullanger, M. Jouineau, B. Bouammali, D. Lafont, G. Gard, Descotes. *Carbohydrate Research*. **1990**, 202, 151-164.
- [27] G. Despras, A. Alix, D. Urban, B. Vauzeilles, J. M. Beau, *Angewandte Chemie-International Edition*. **2014**, 53, 11912-11916.
- [28] M. Kurosu, K. Li, D. C. Crick, *Organic Letters*. **2009**, 11, 2393-2396.

## 4 NMR Spectra for the New Compounds

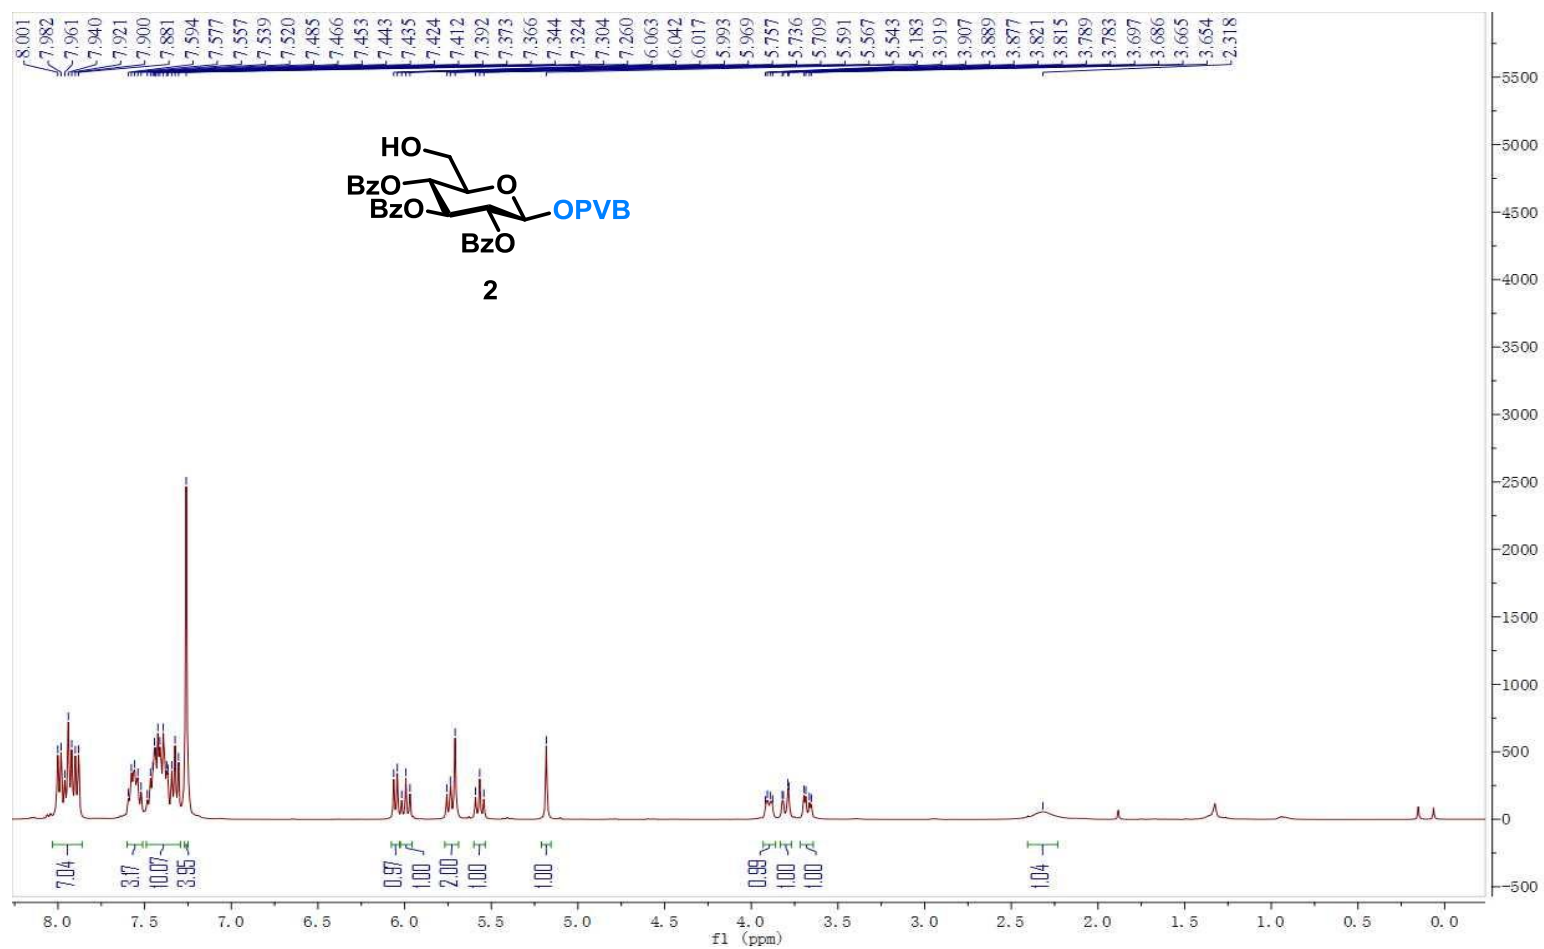

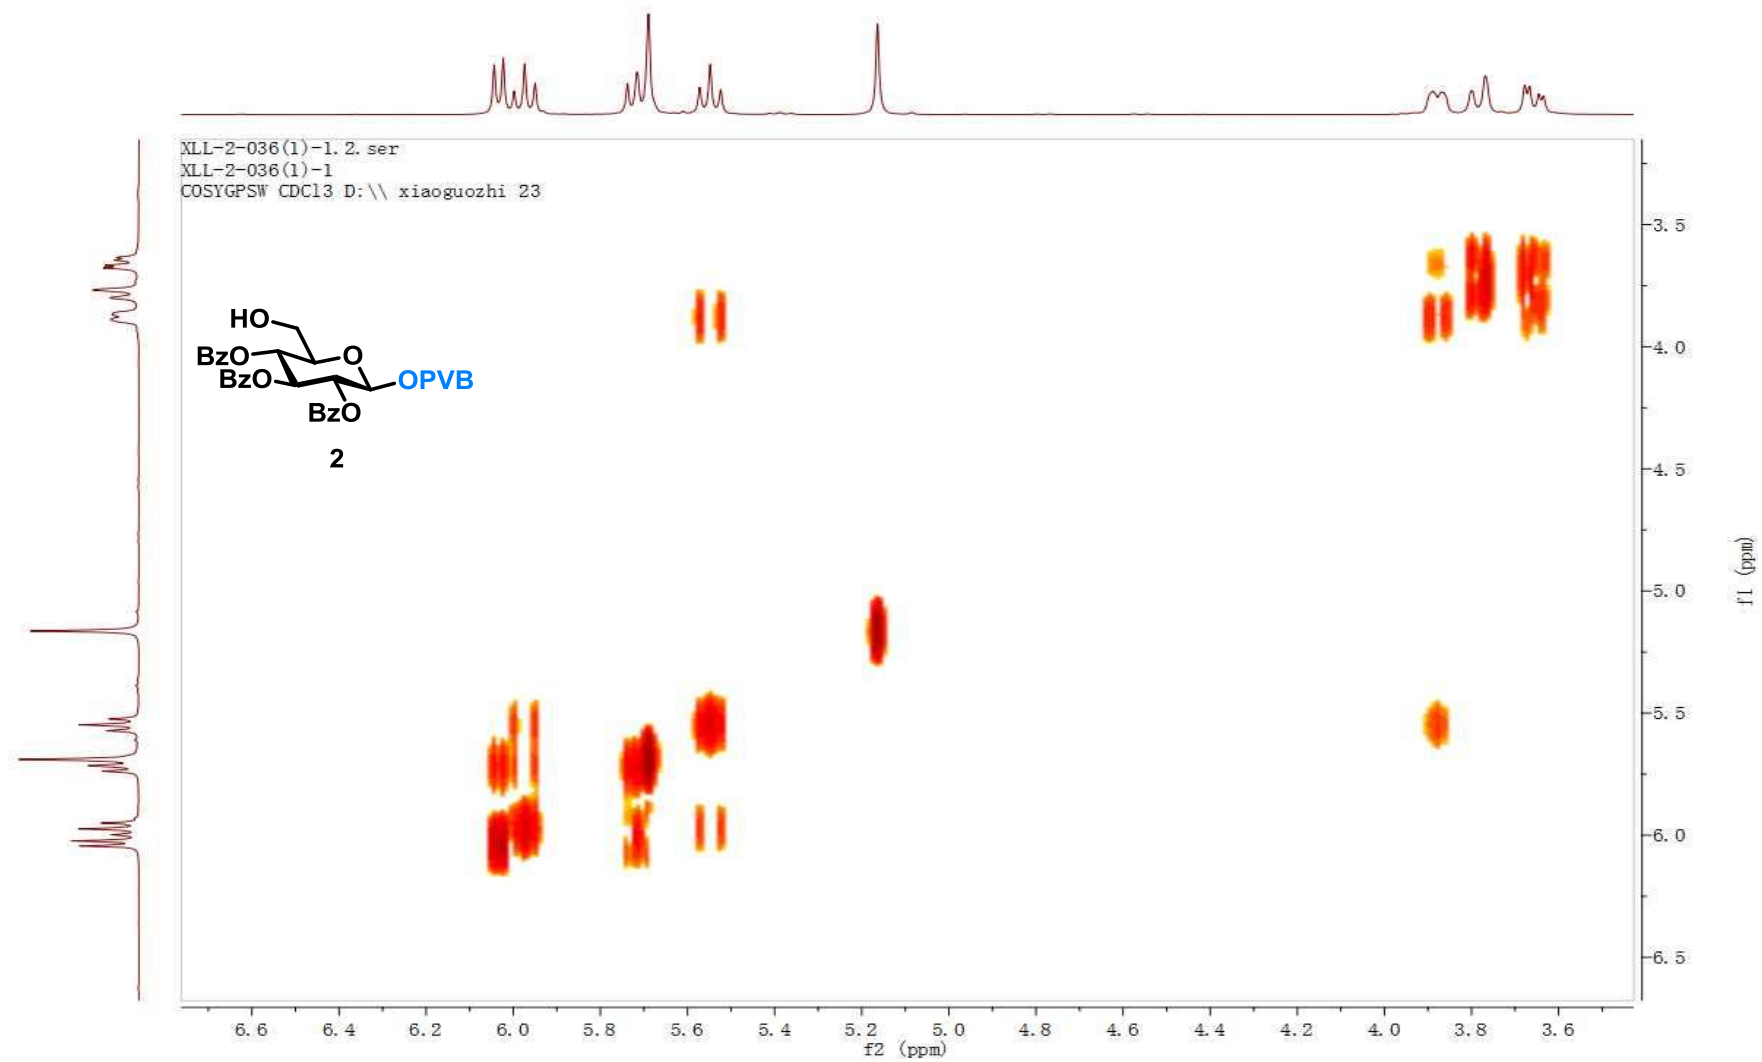

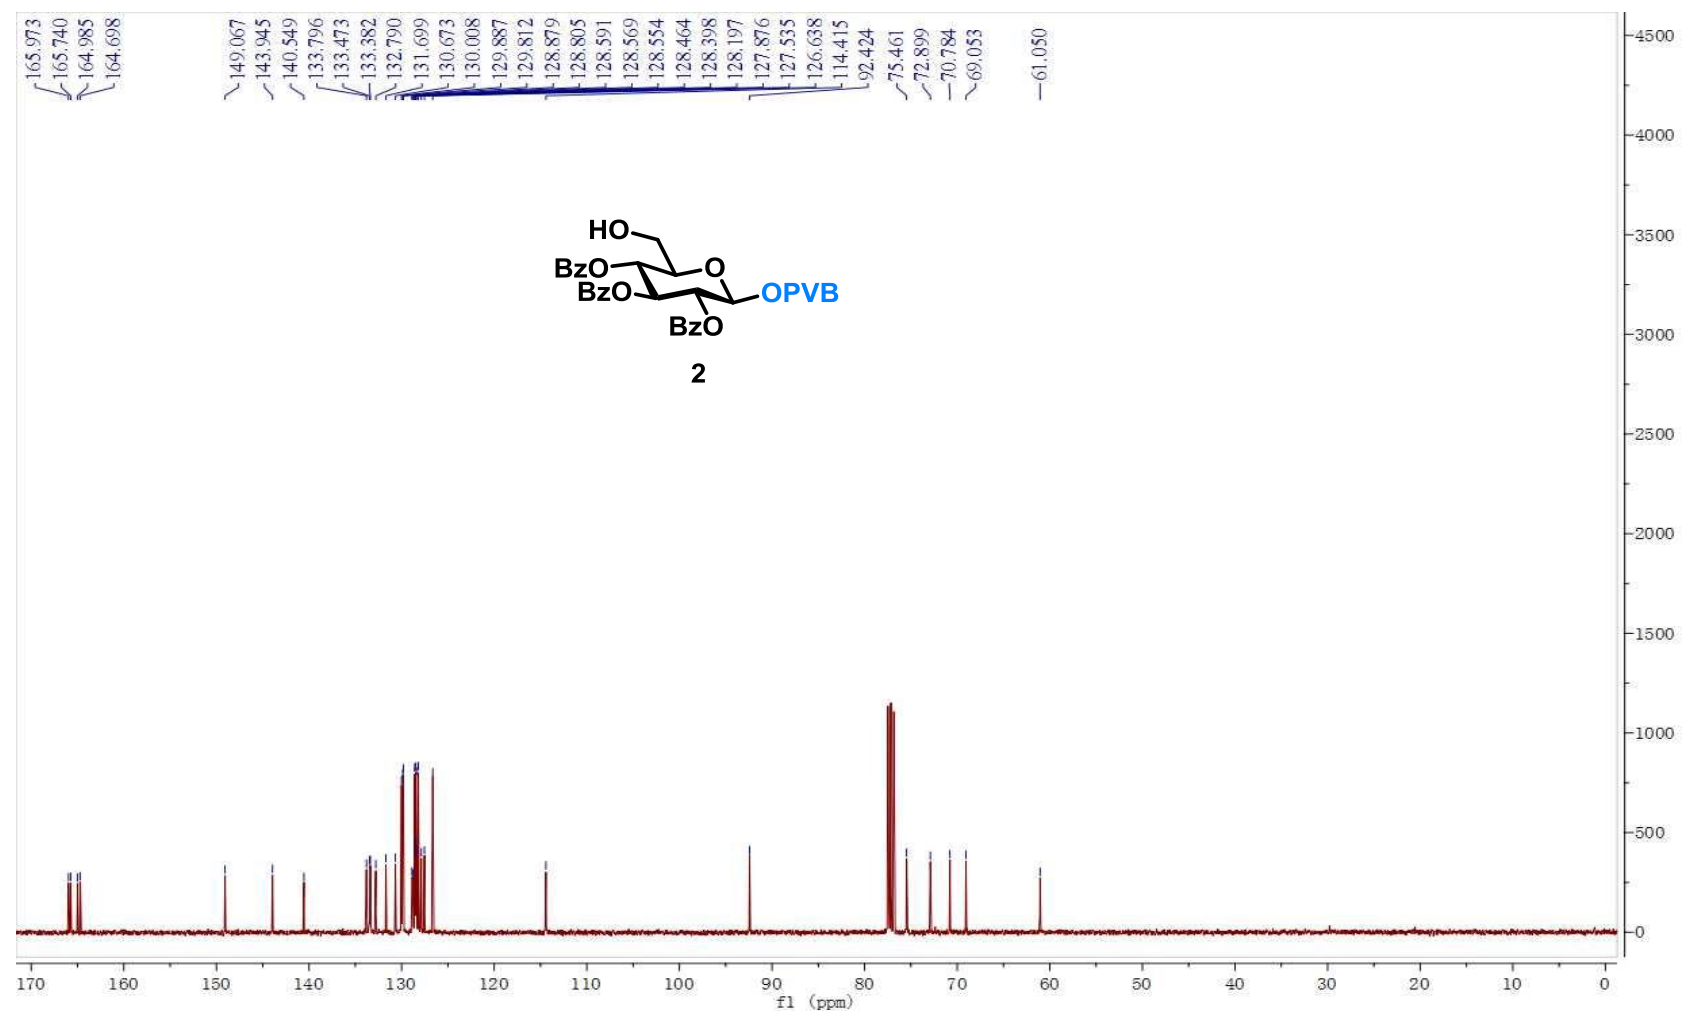

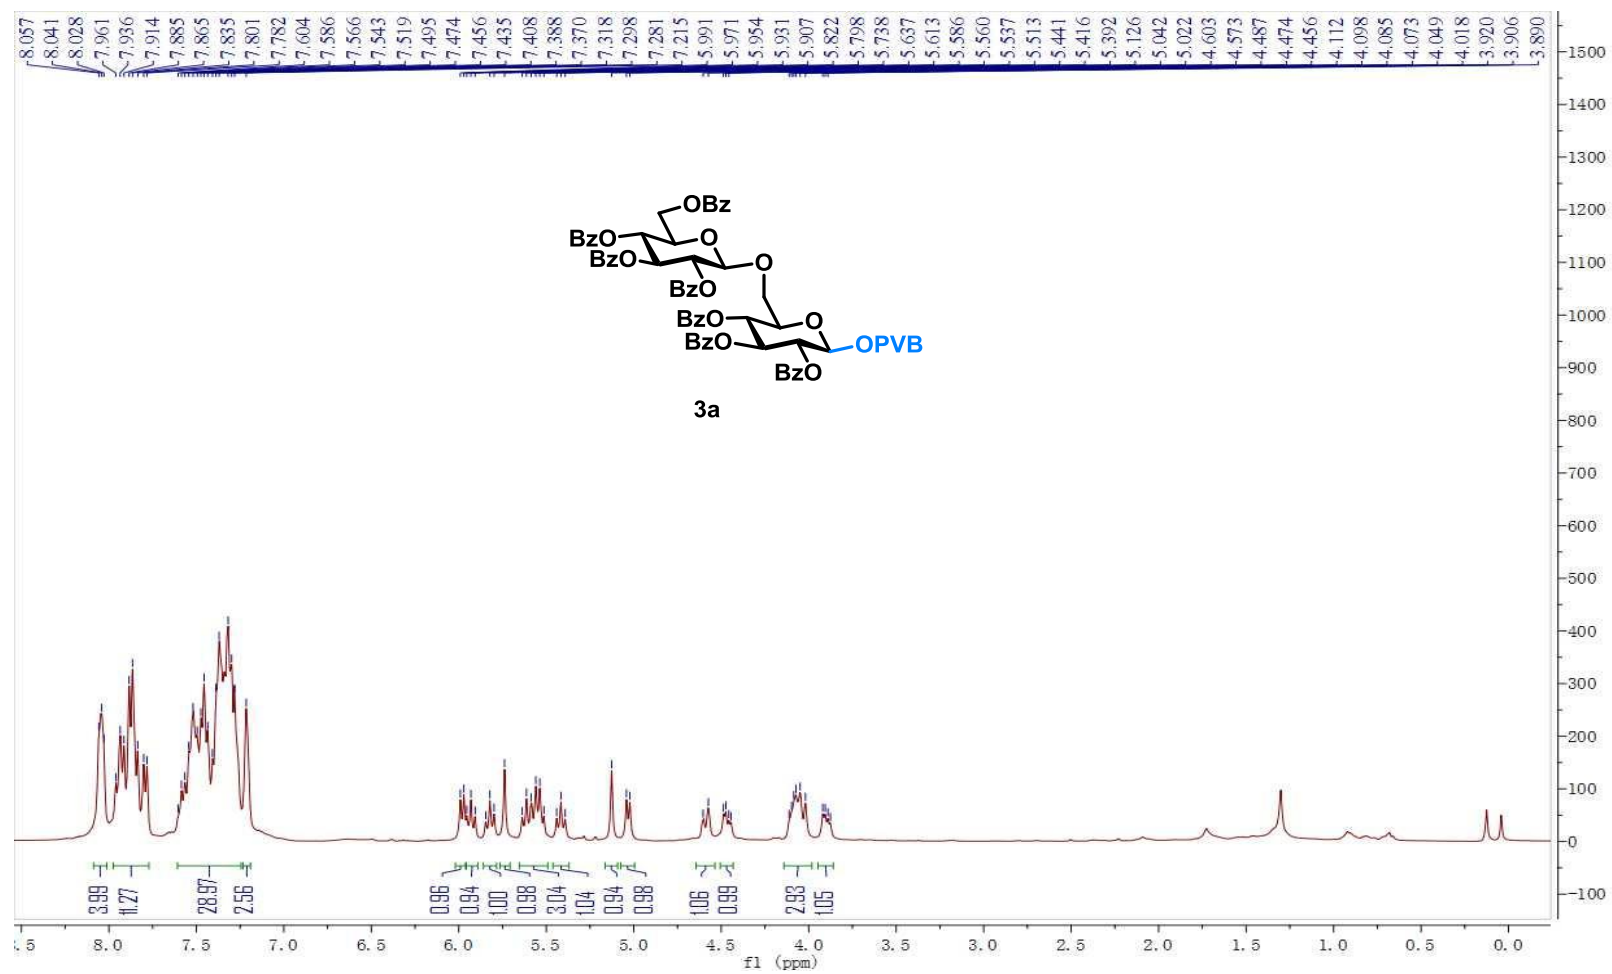

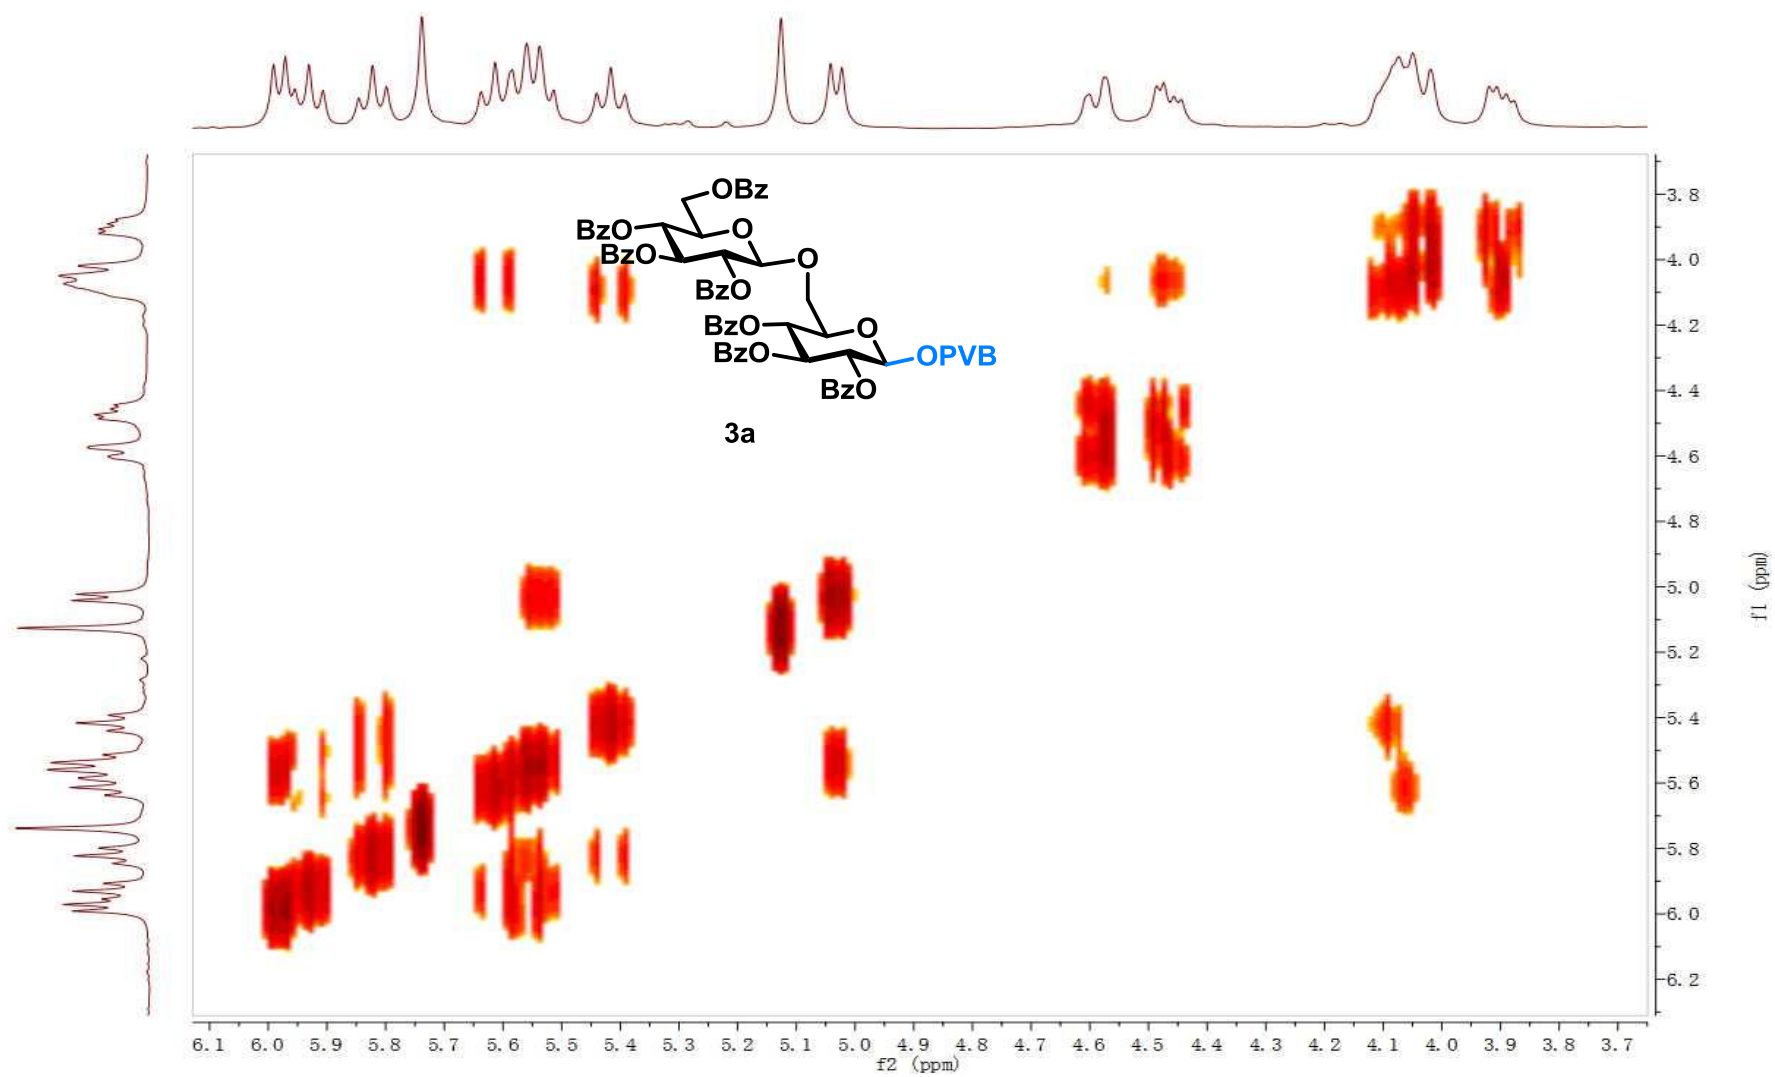

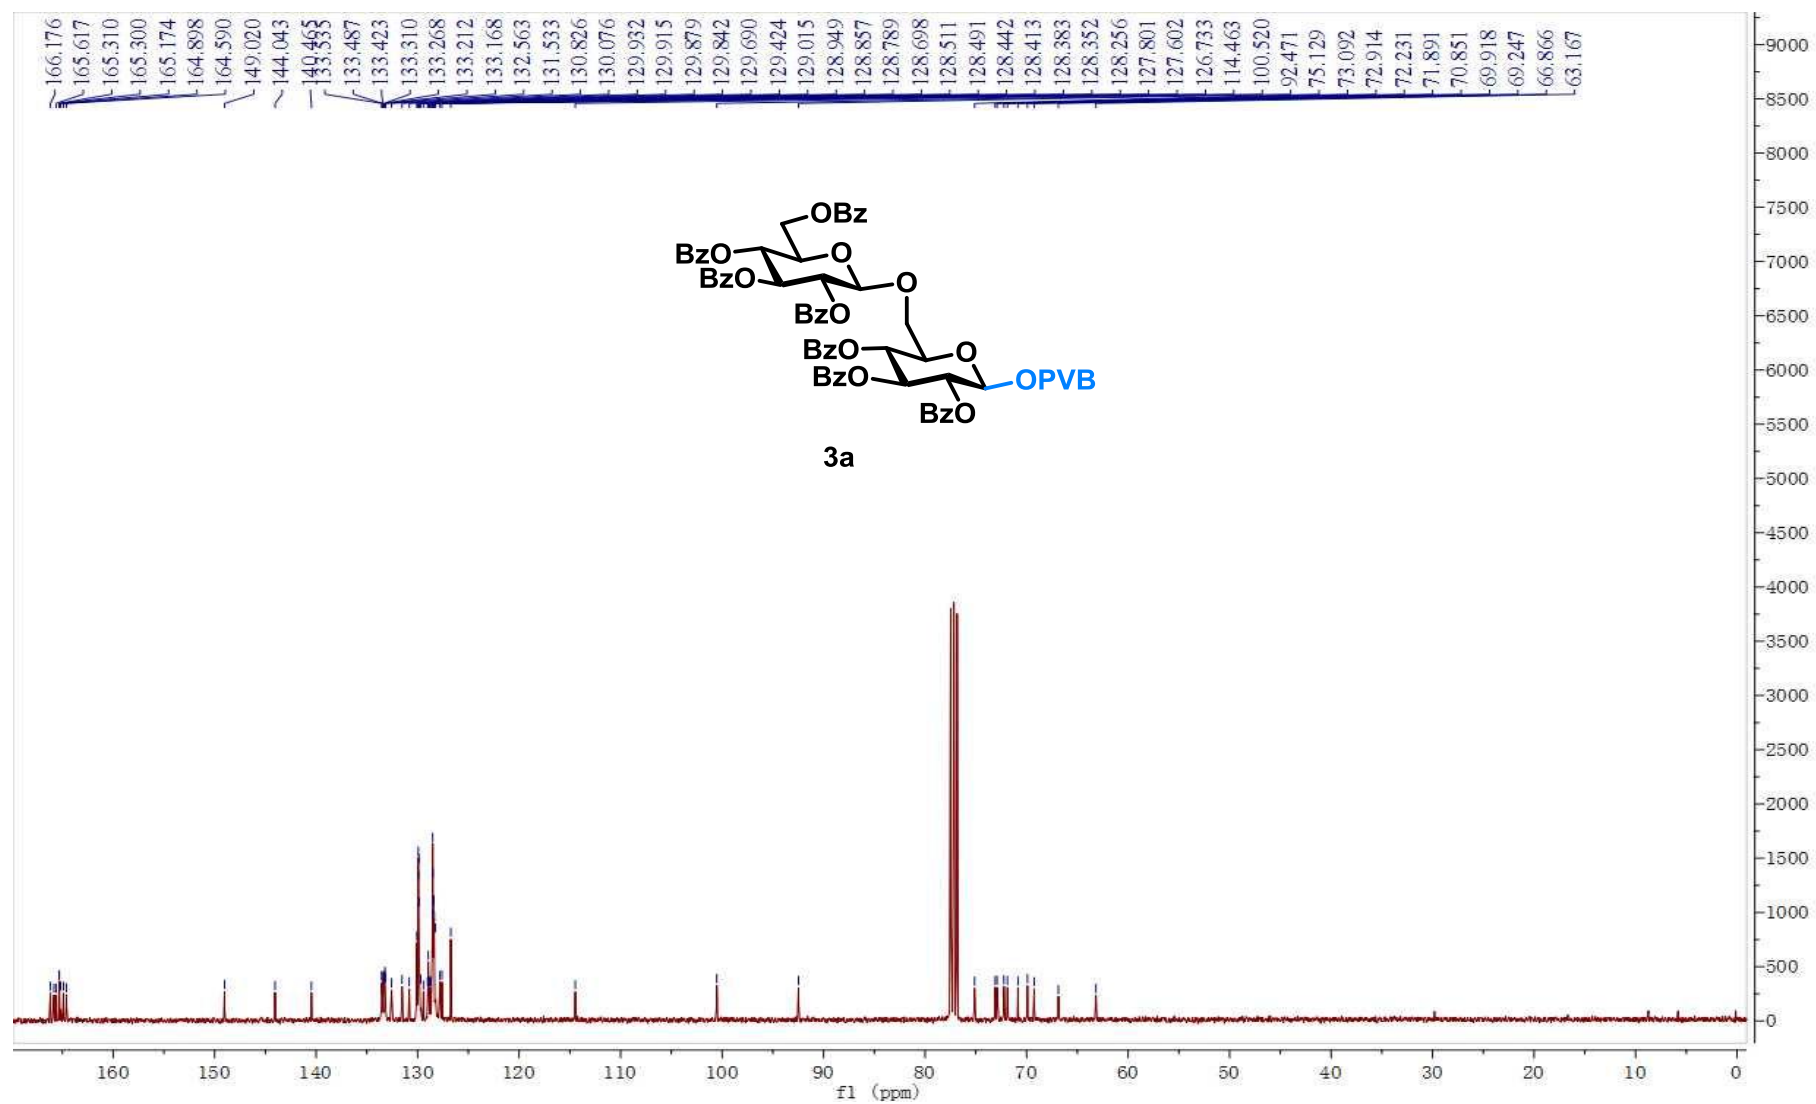

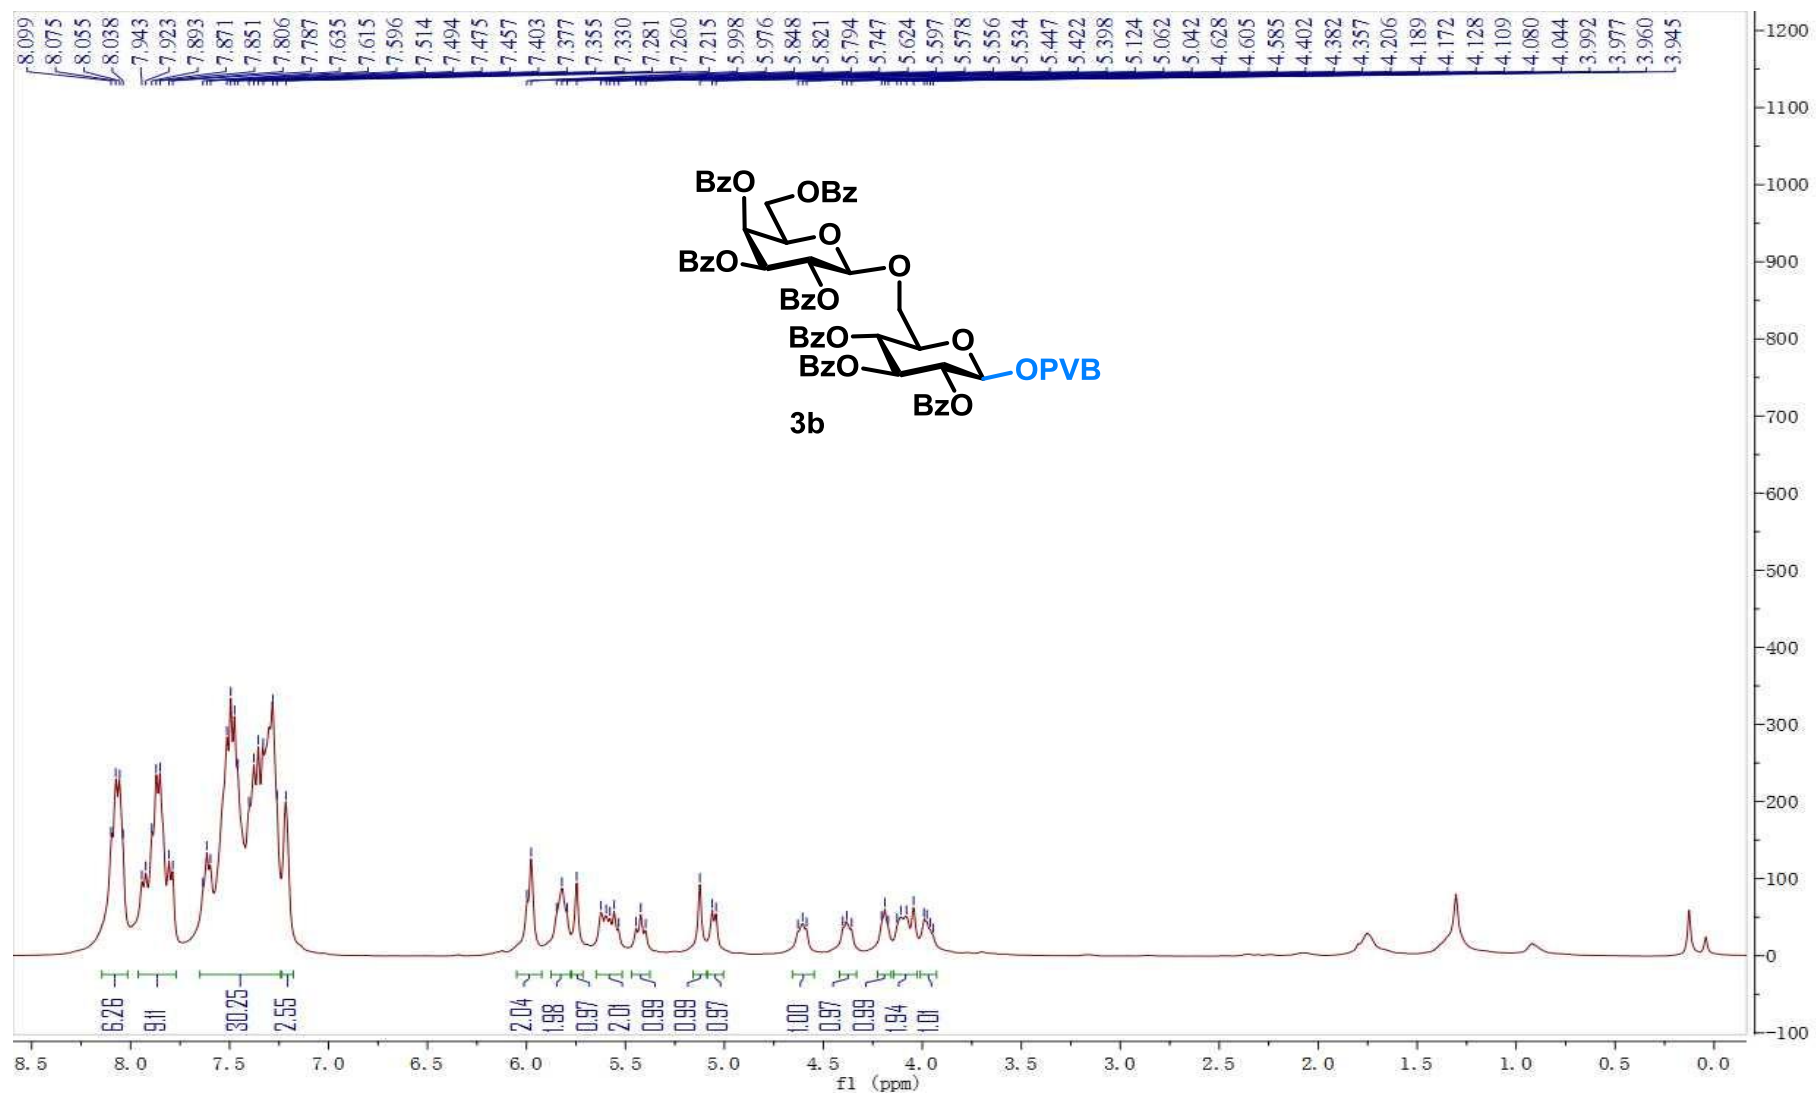



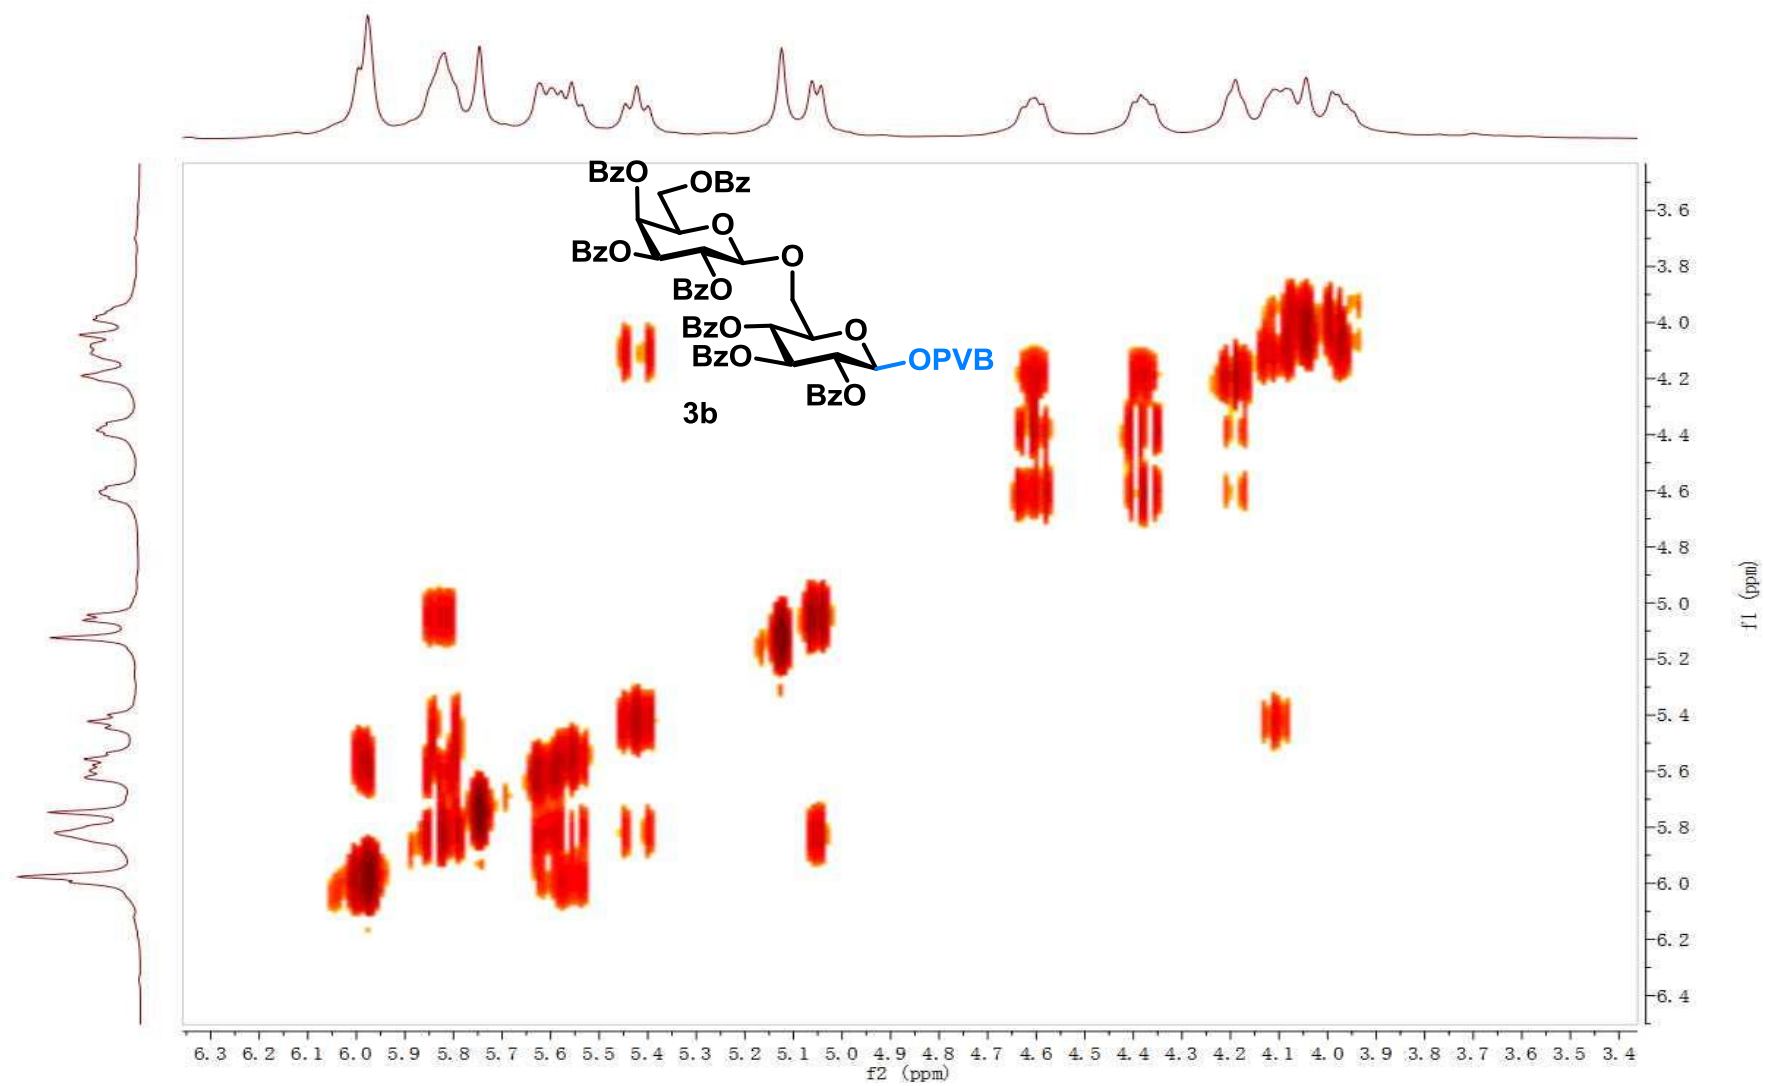



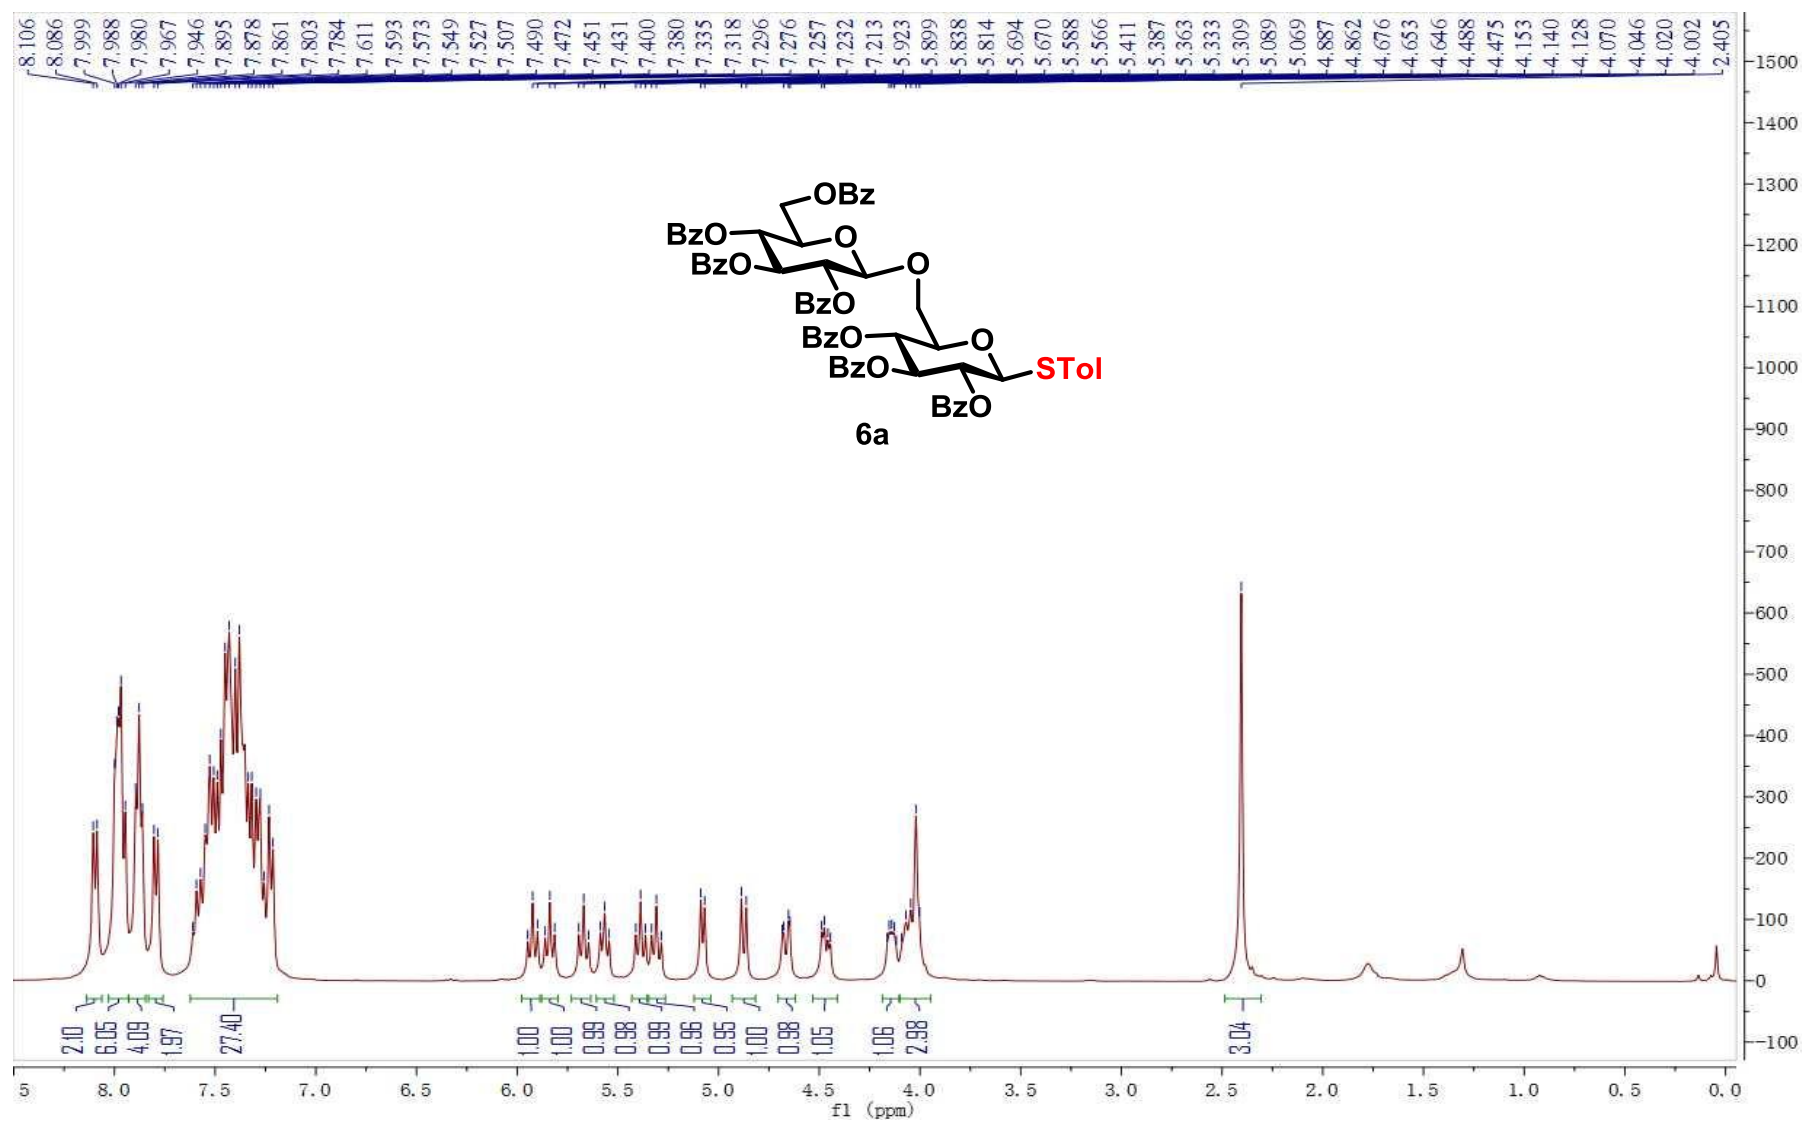

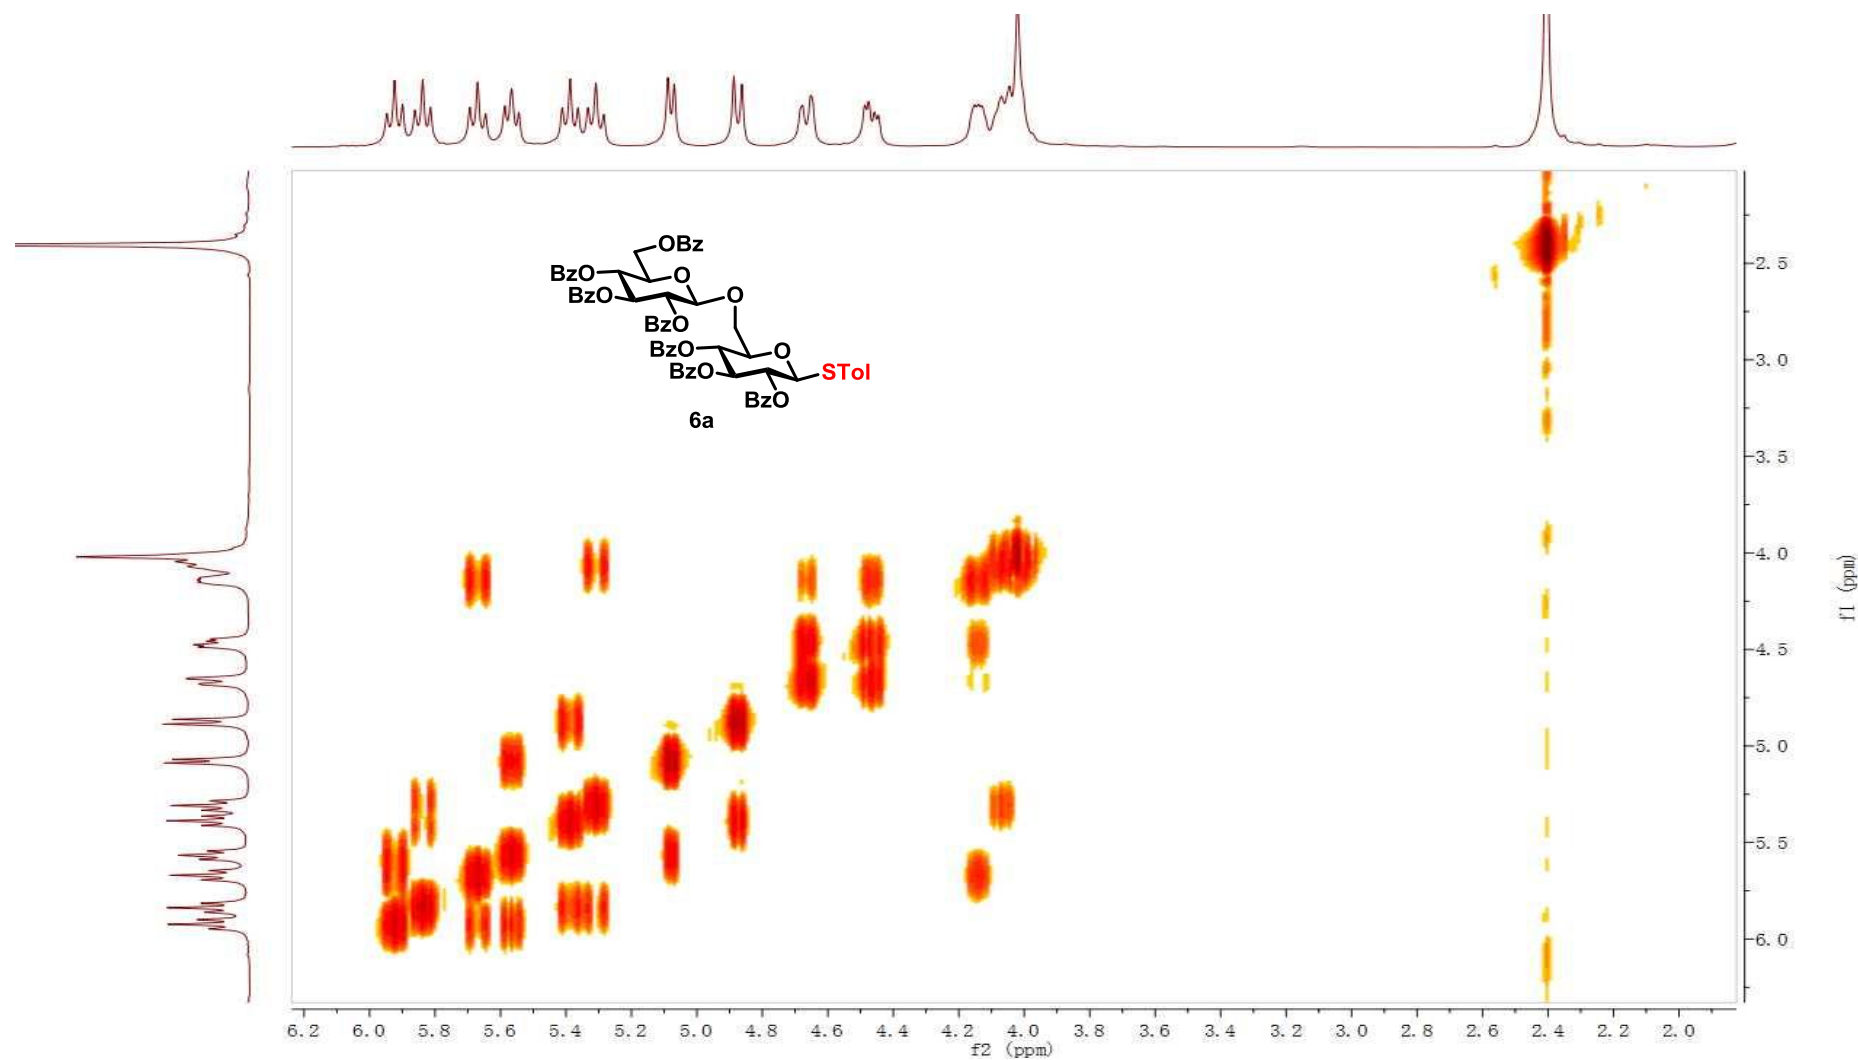

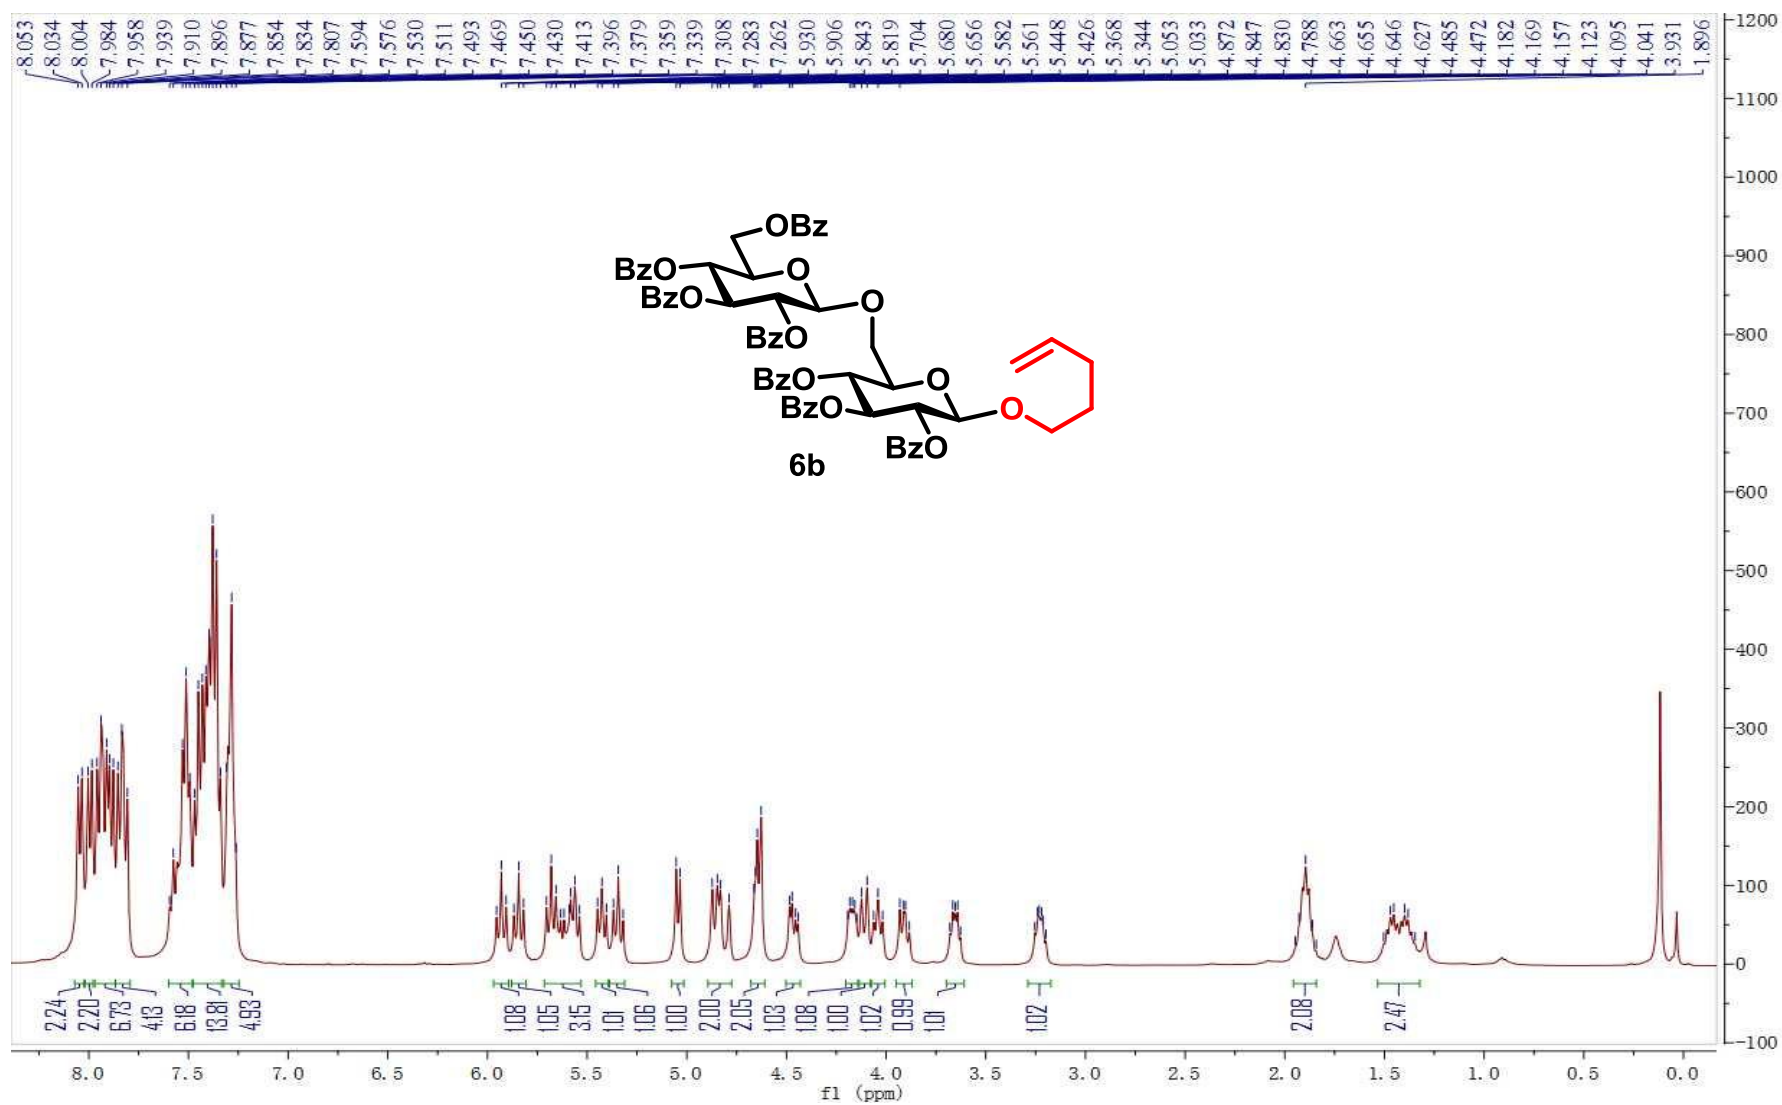

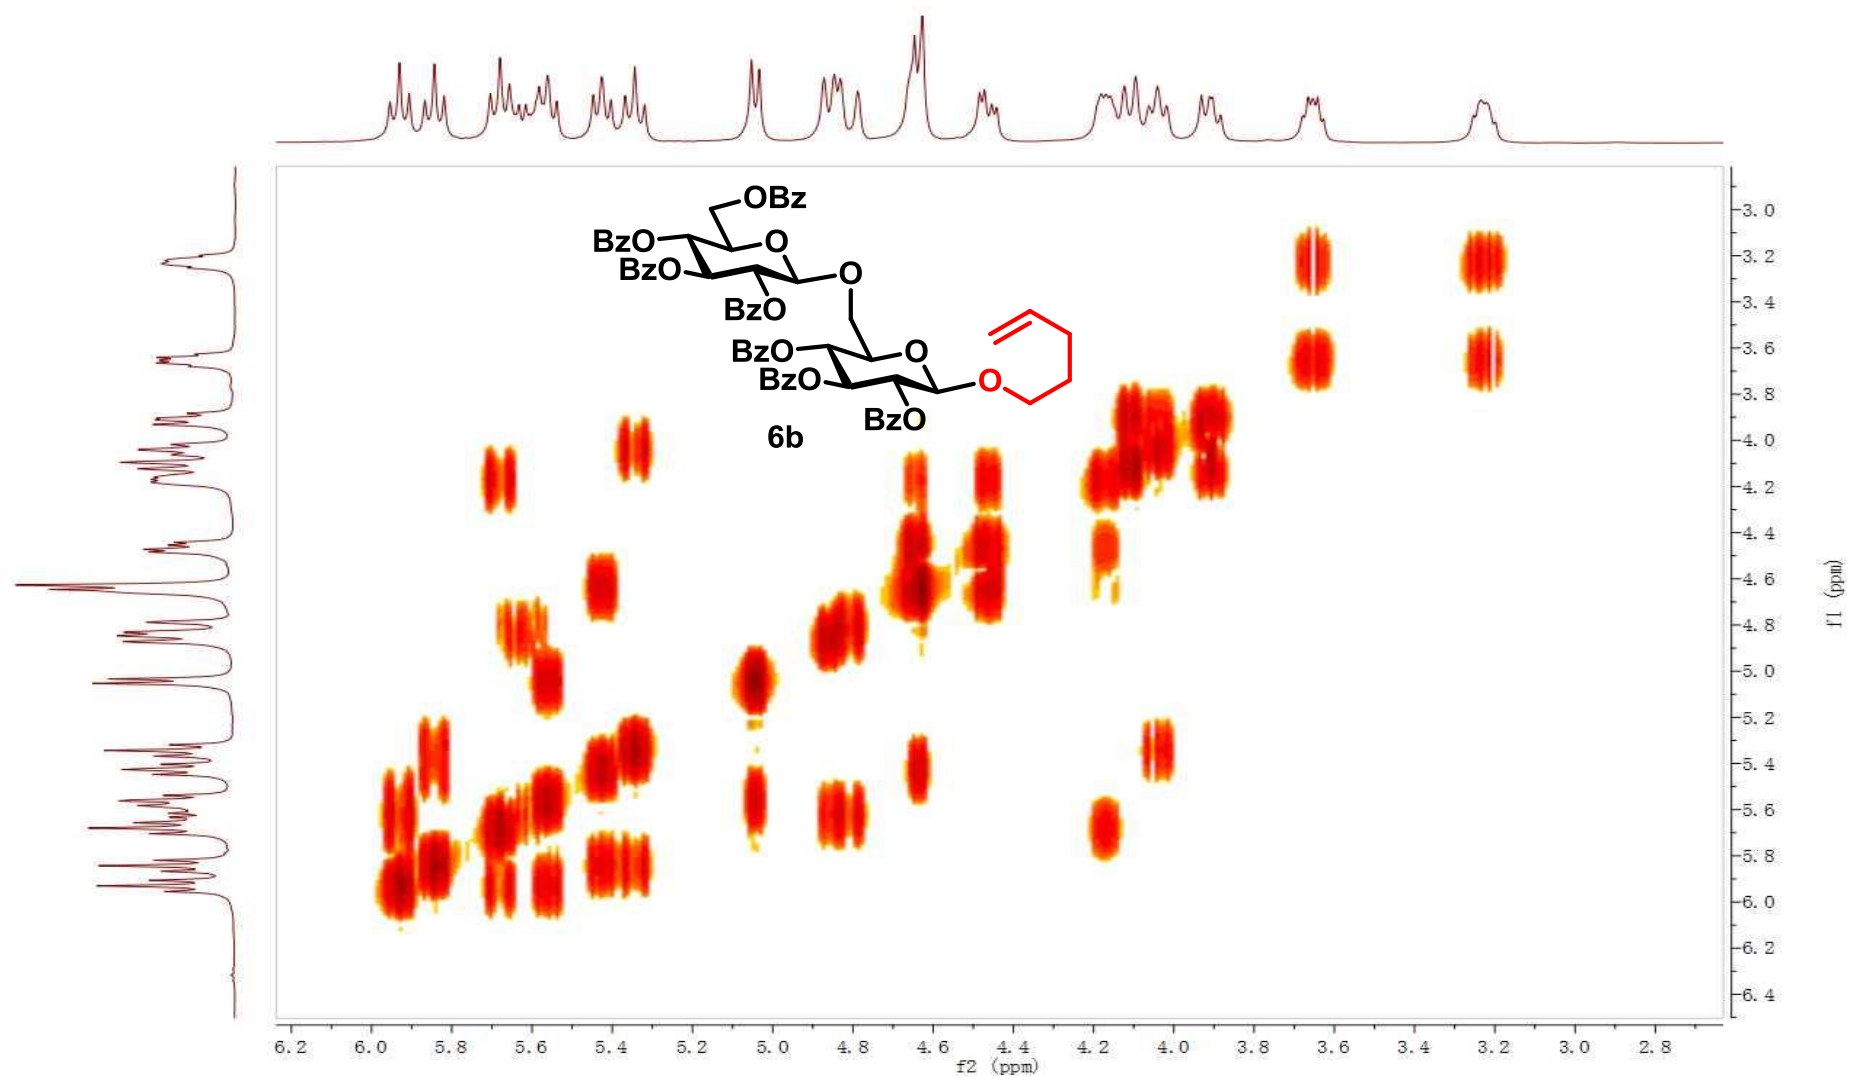

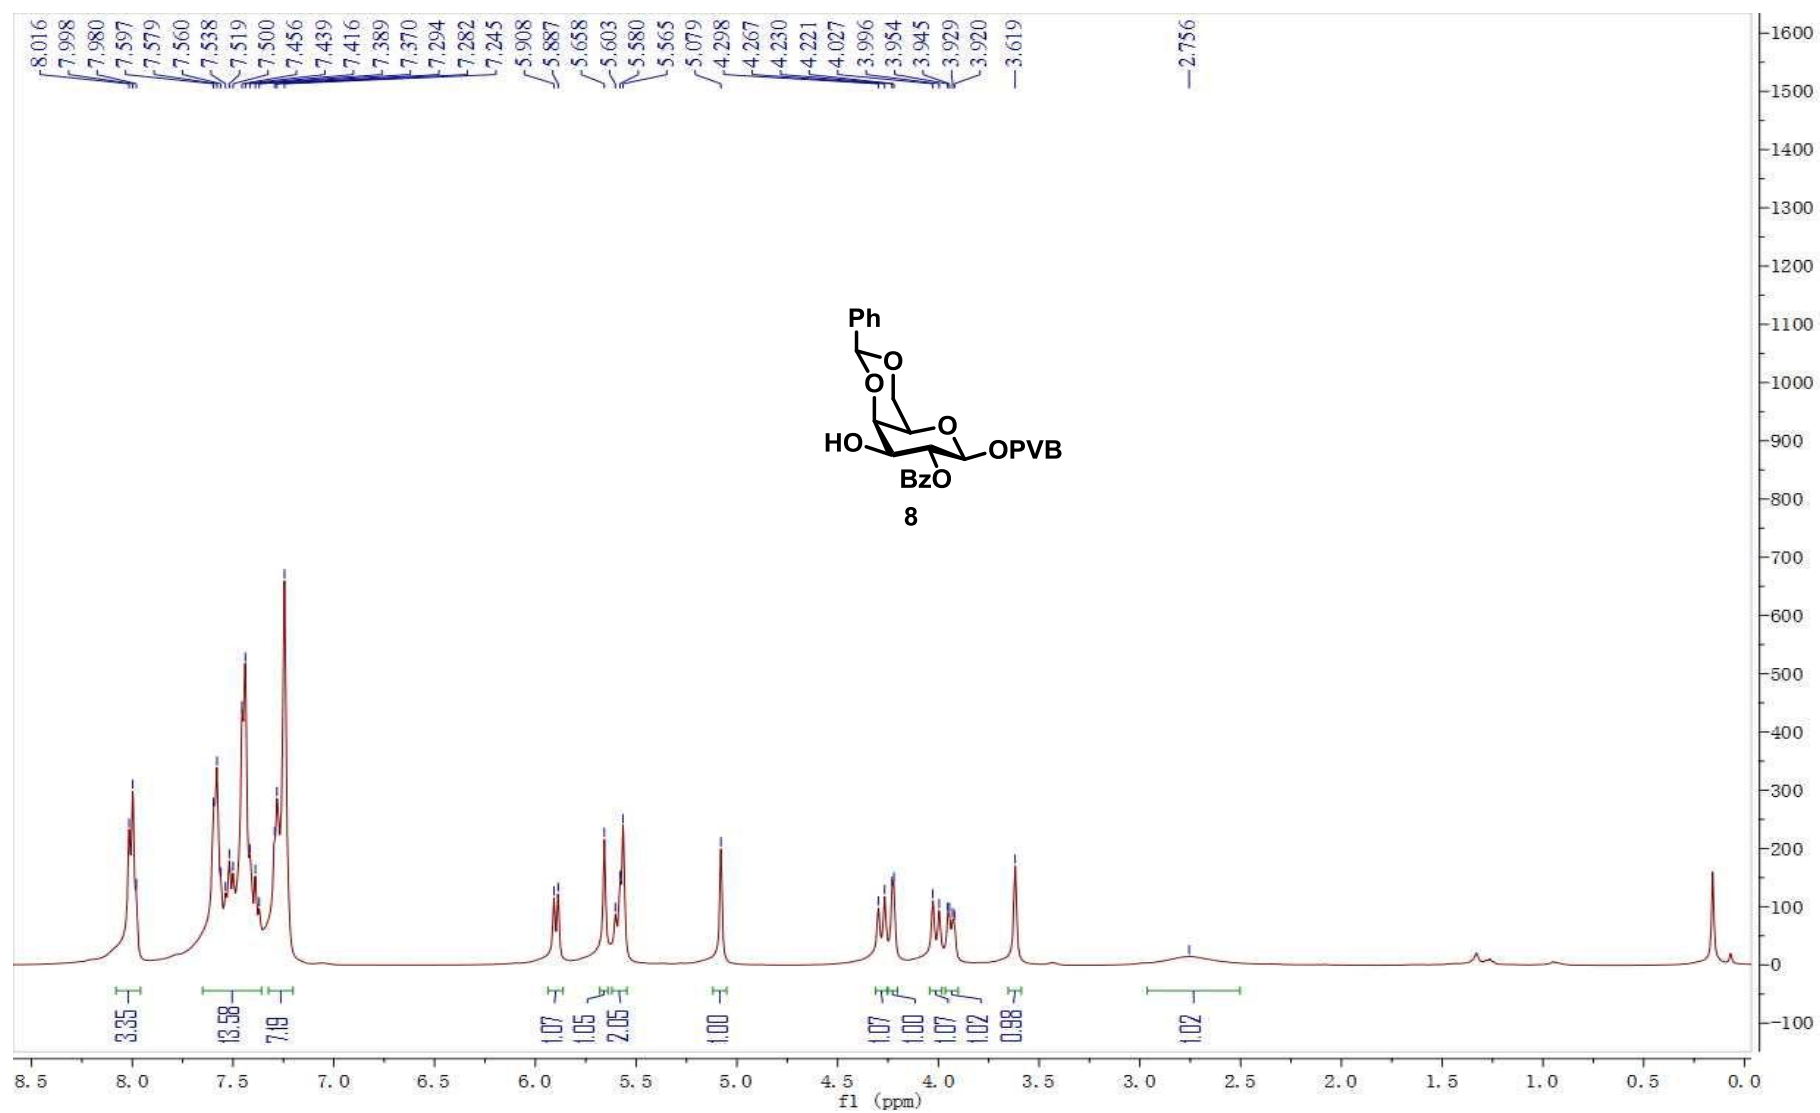

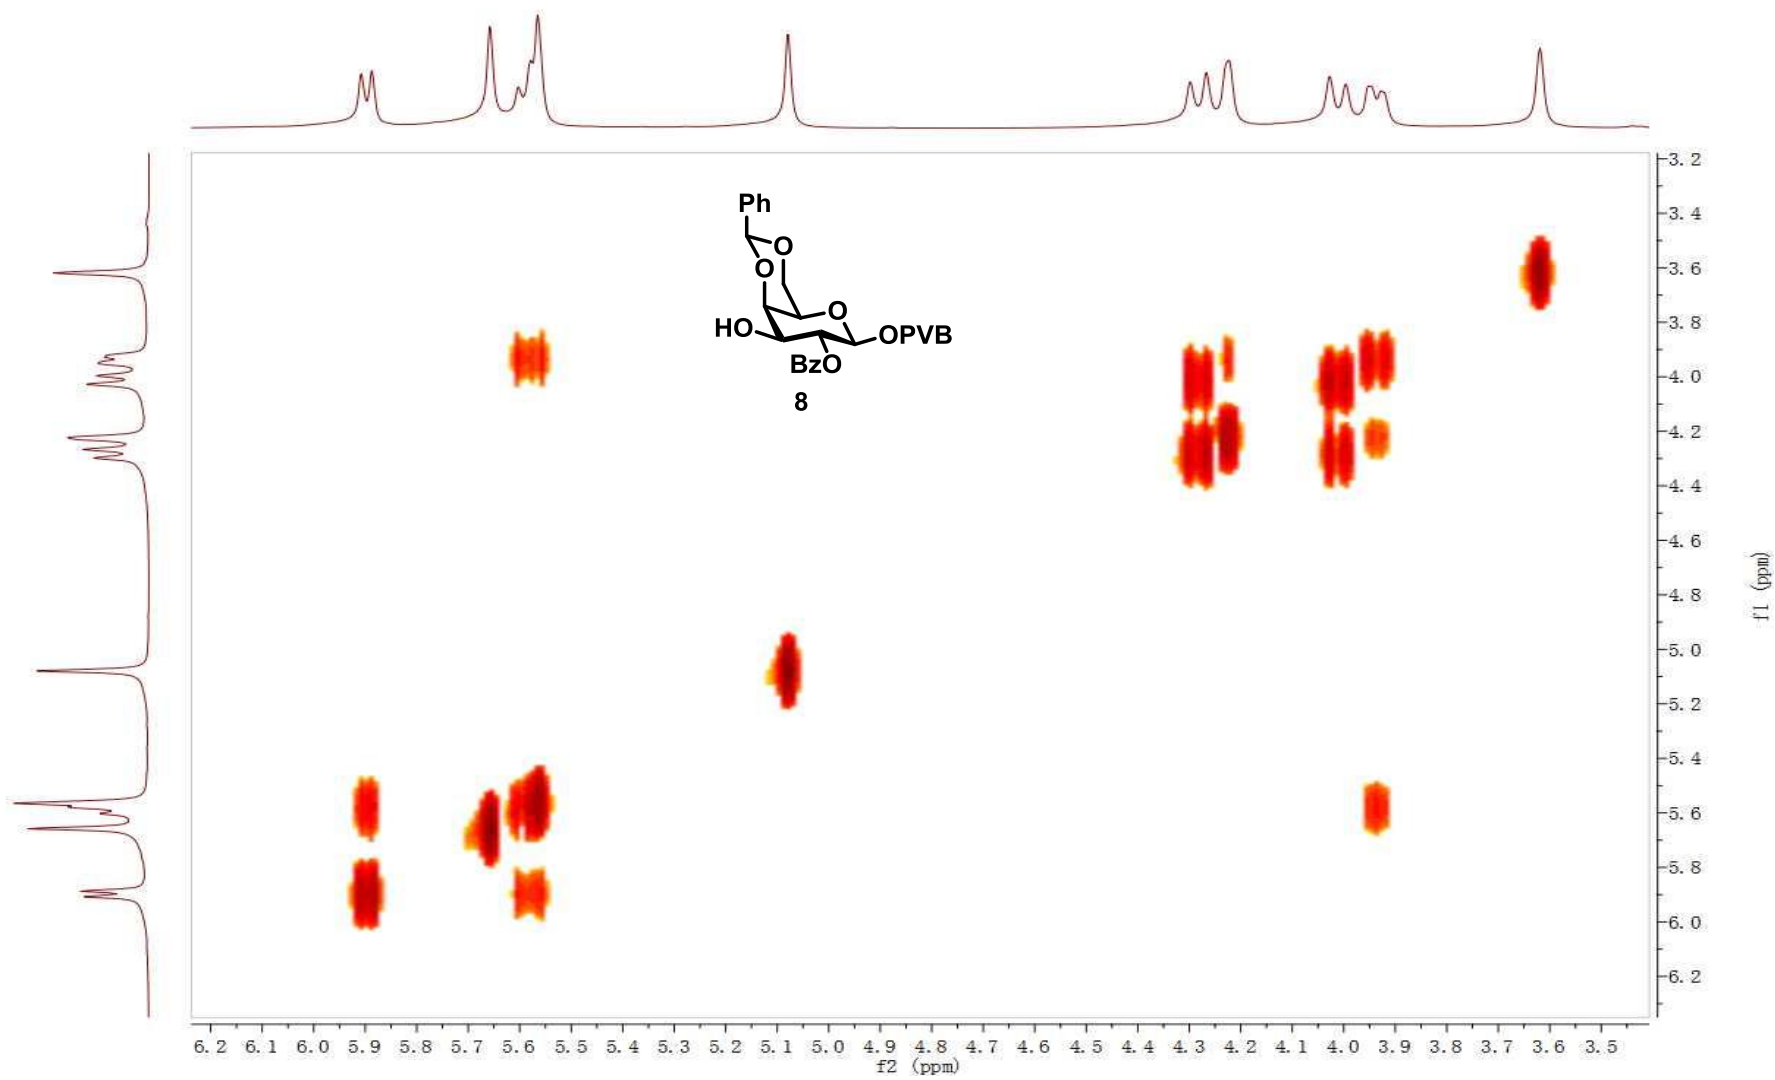



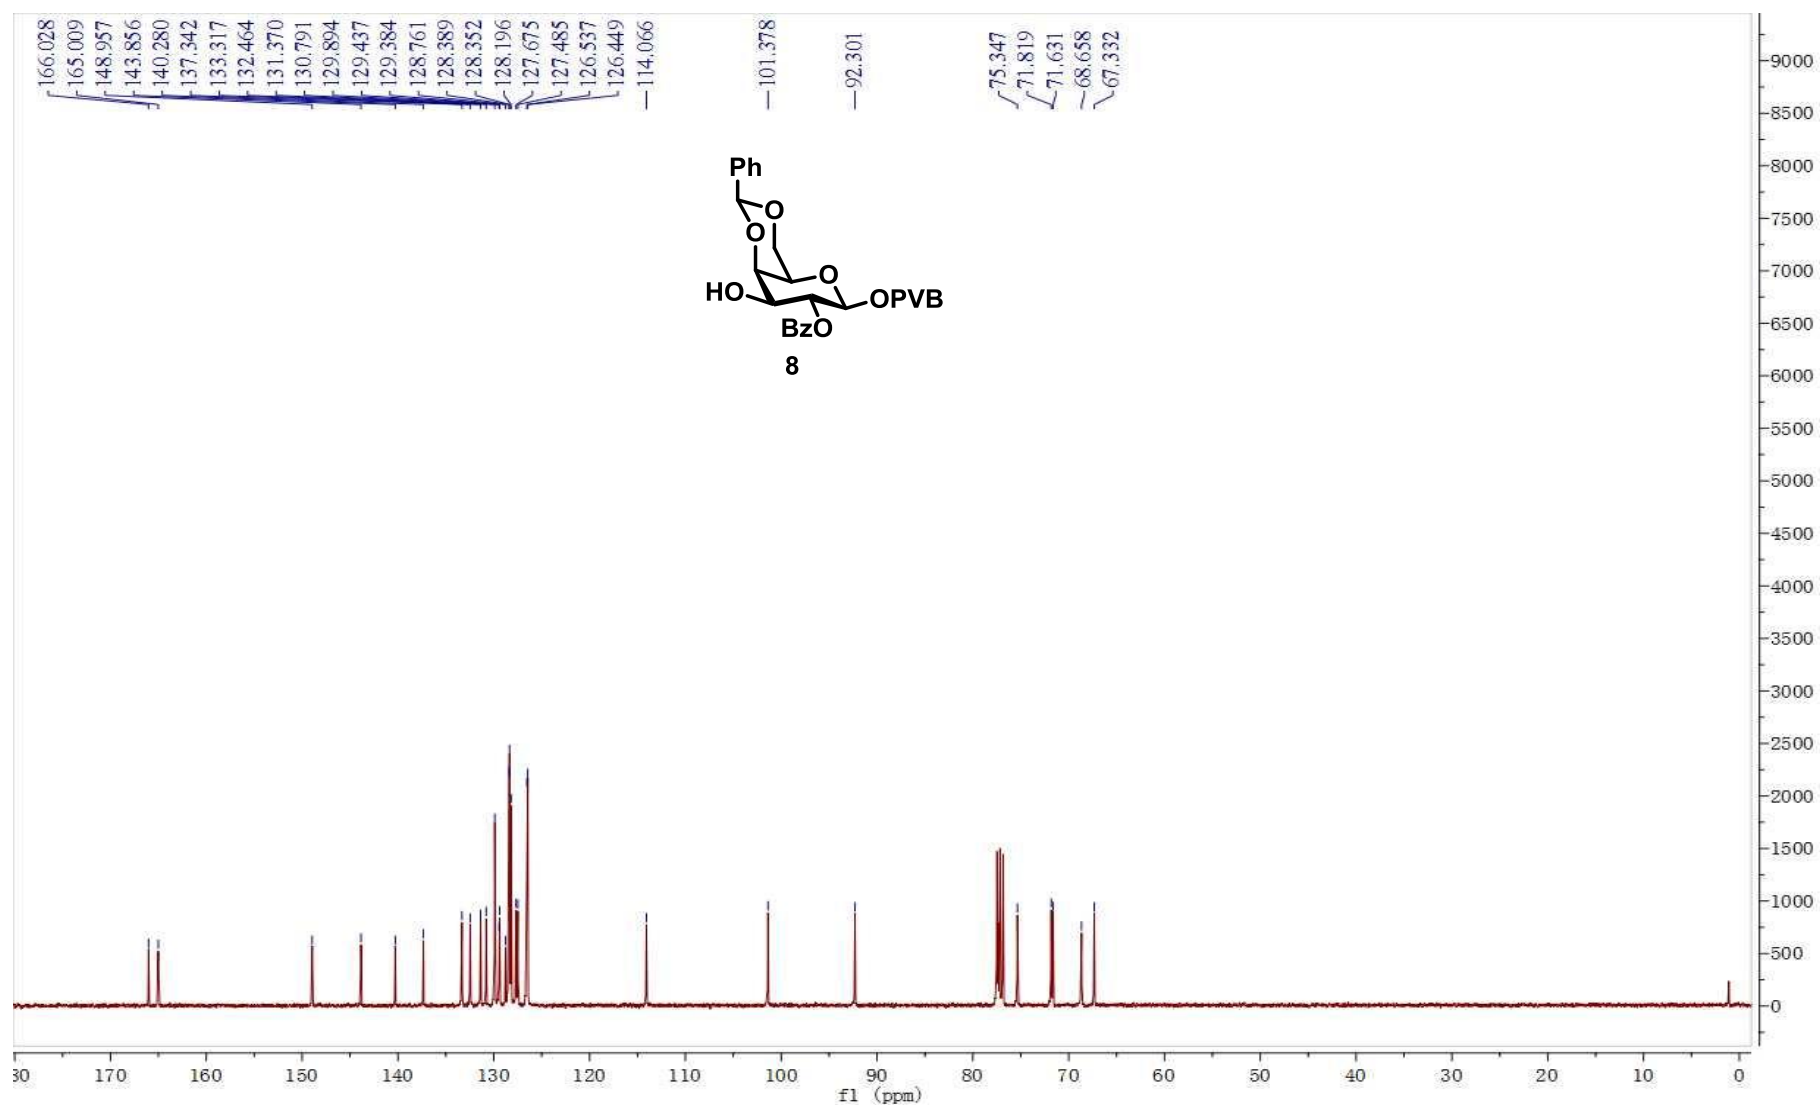

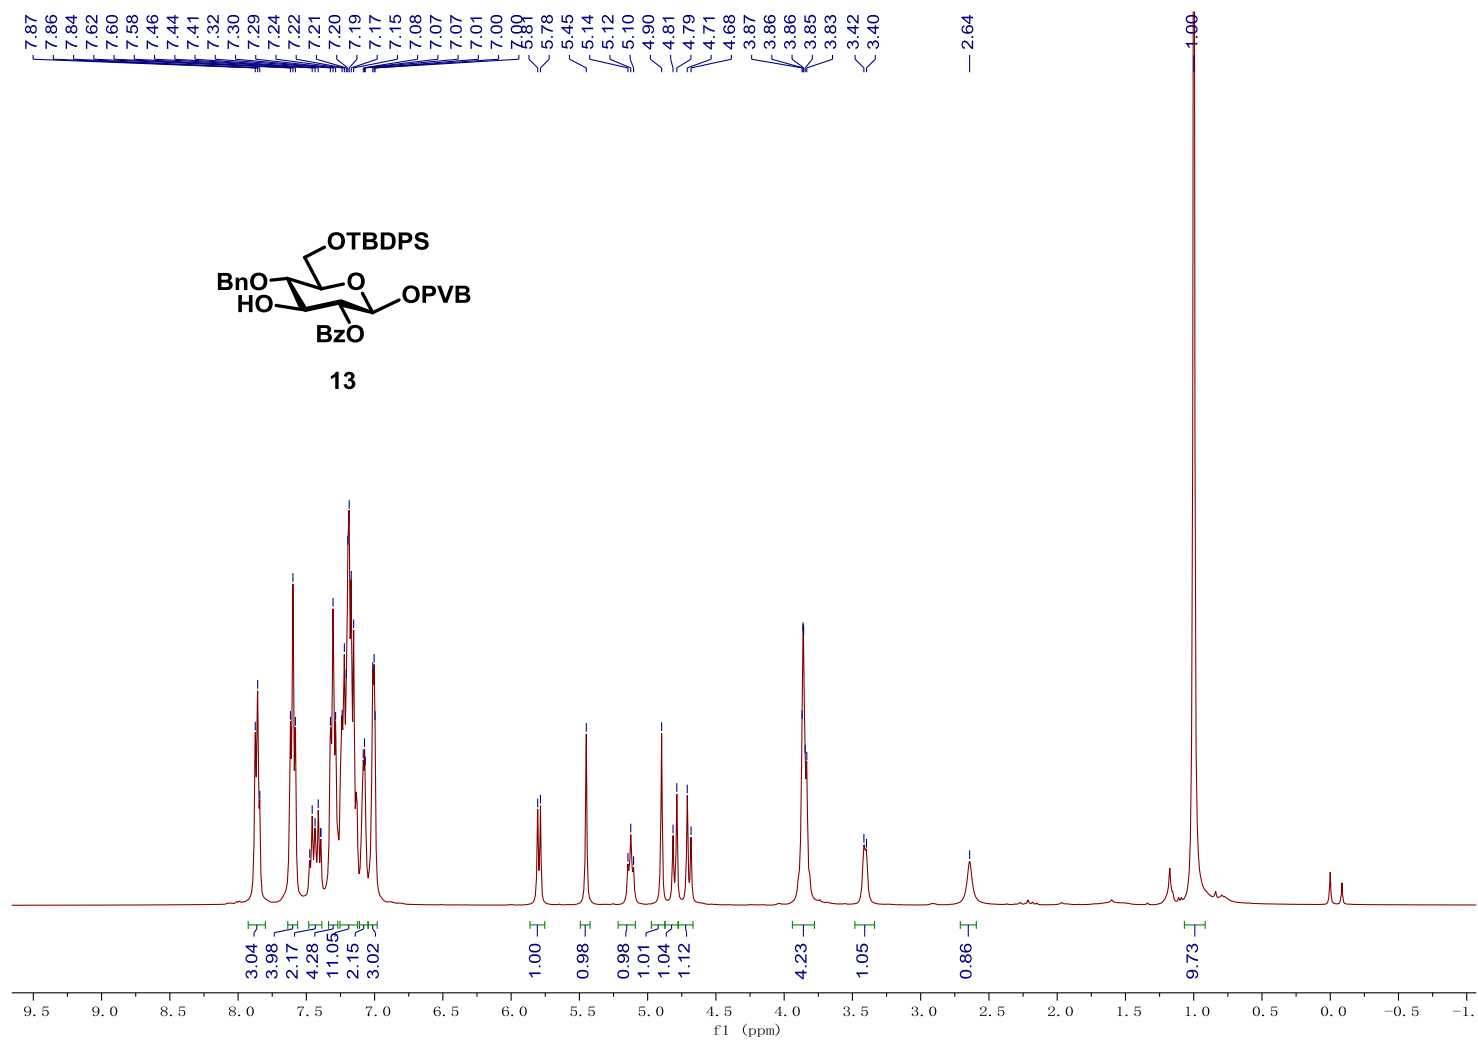

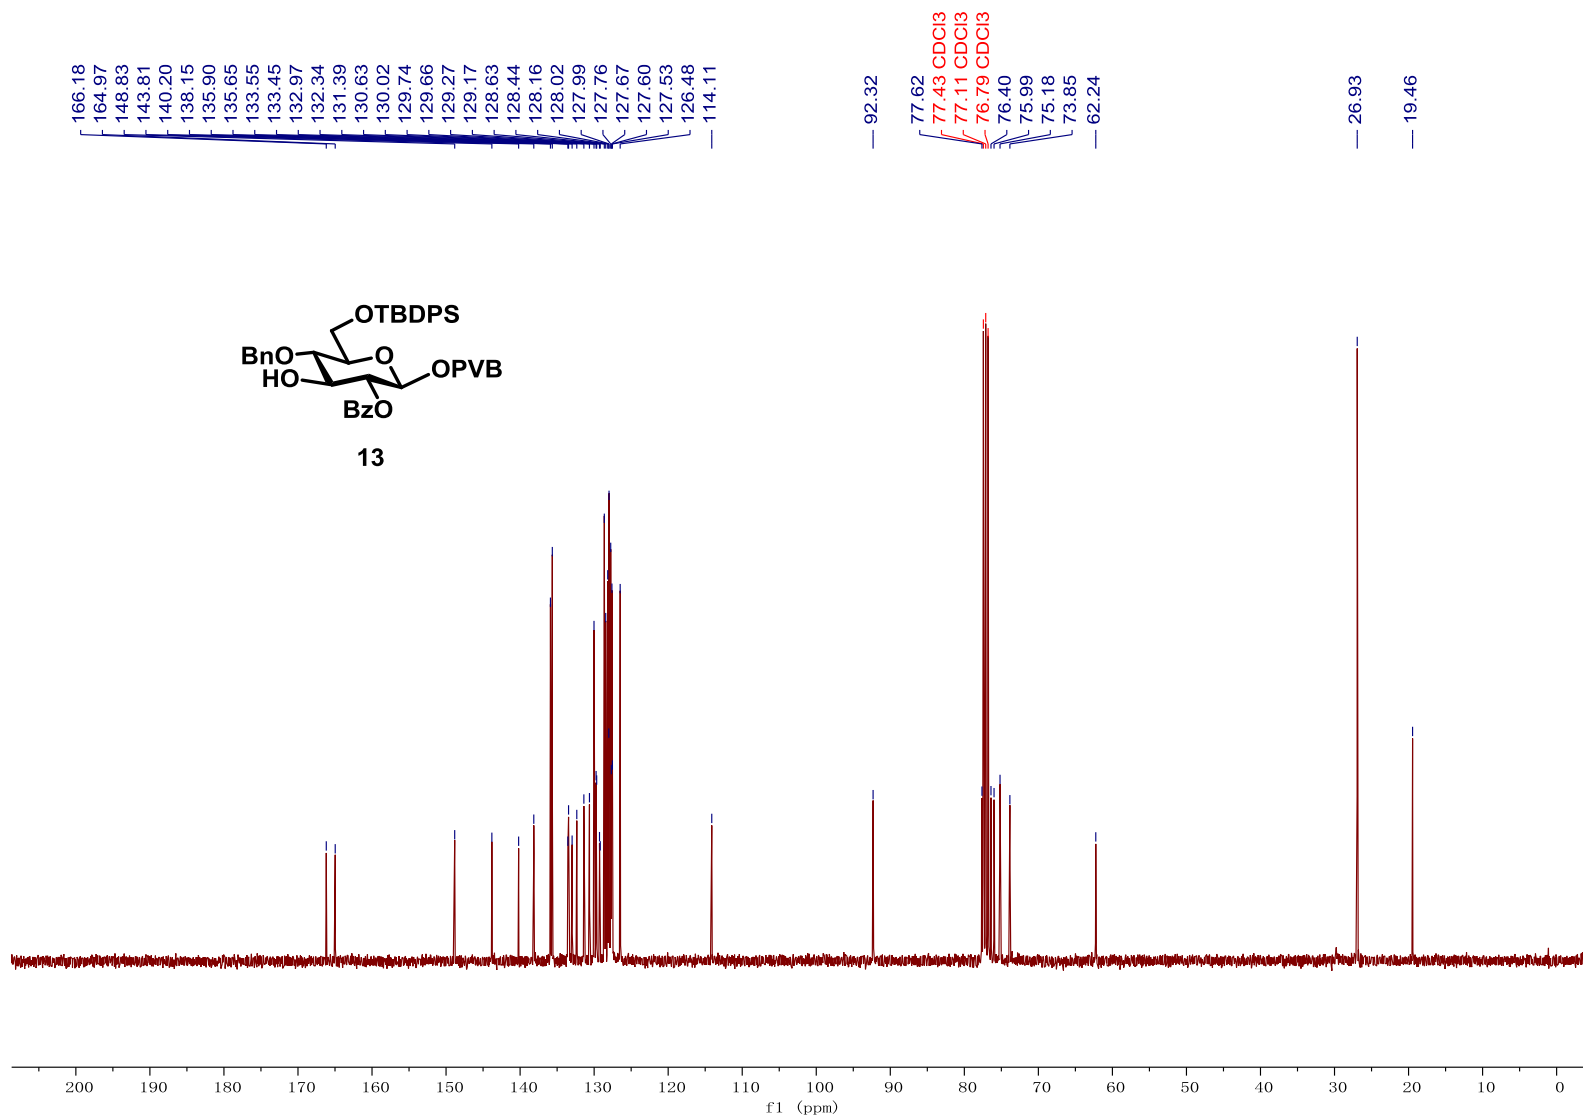

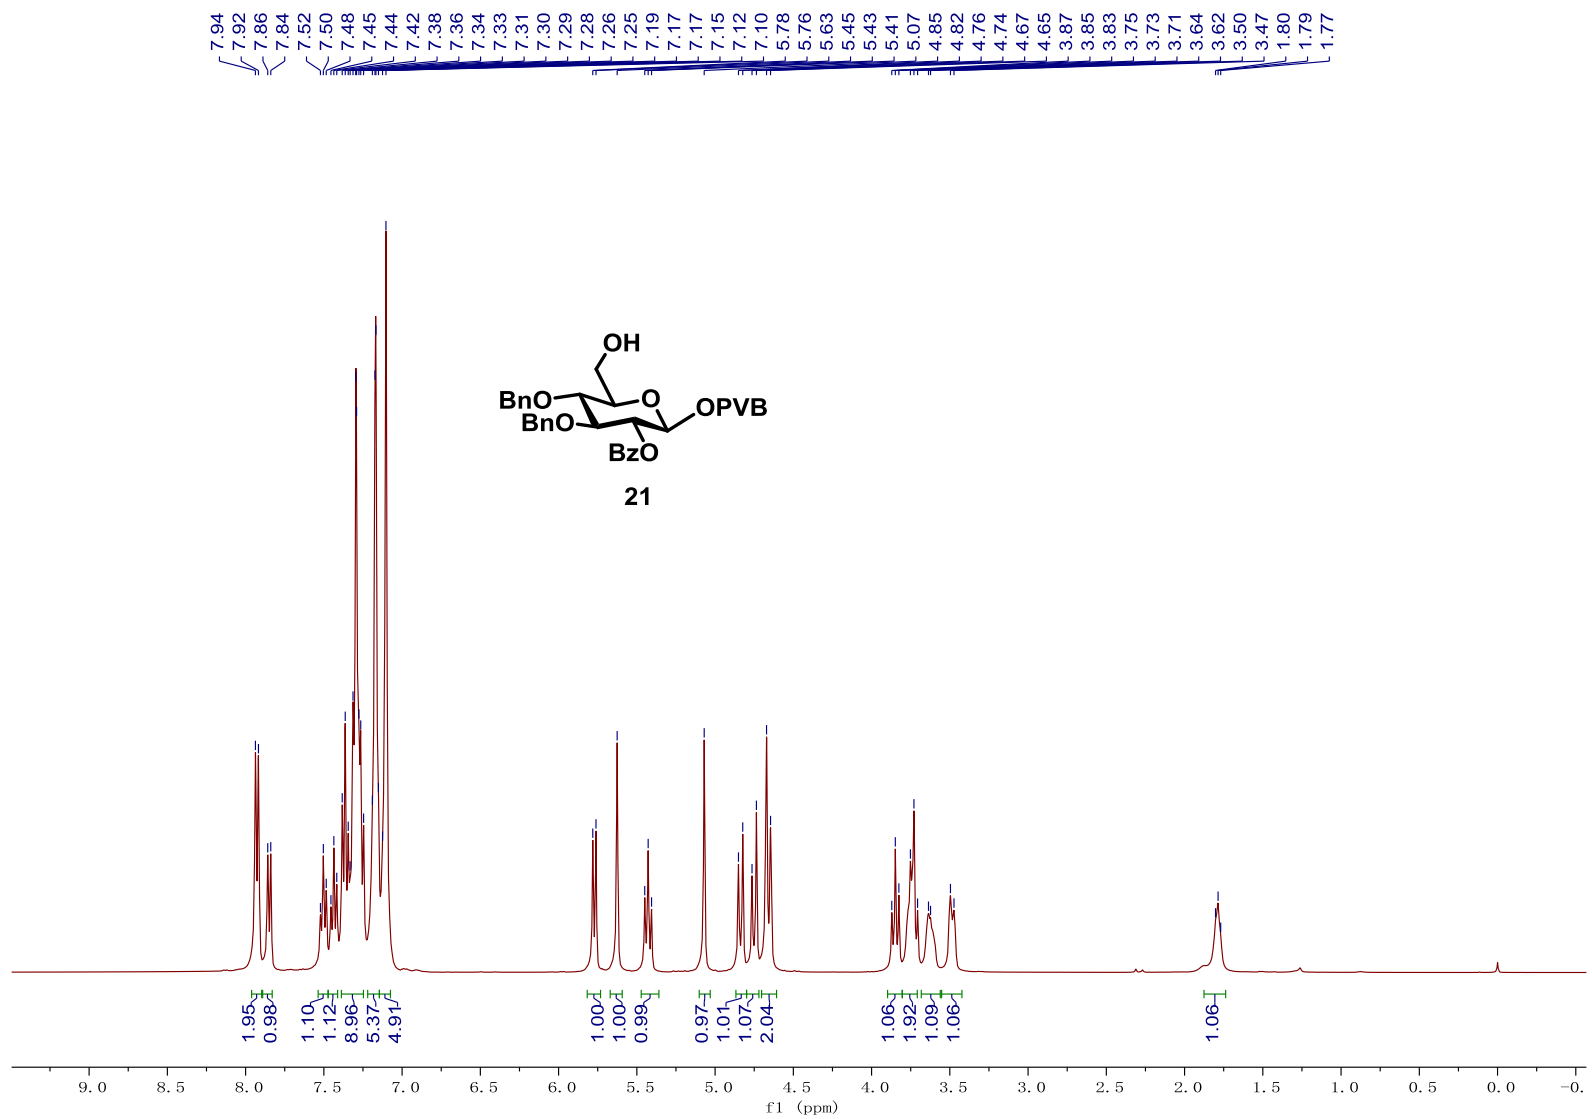

S88

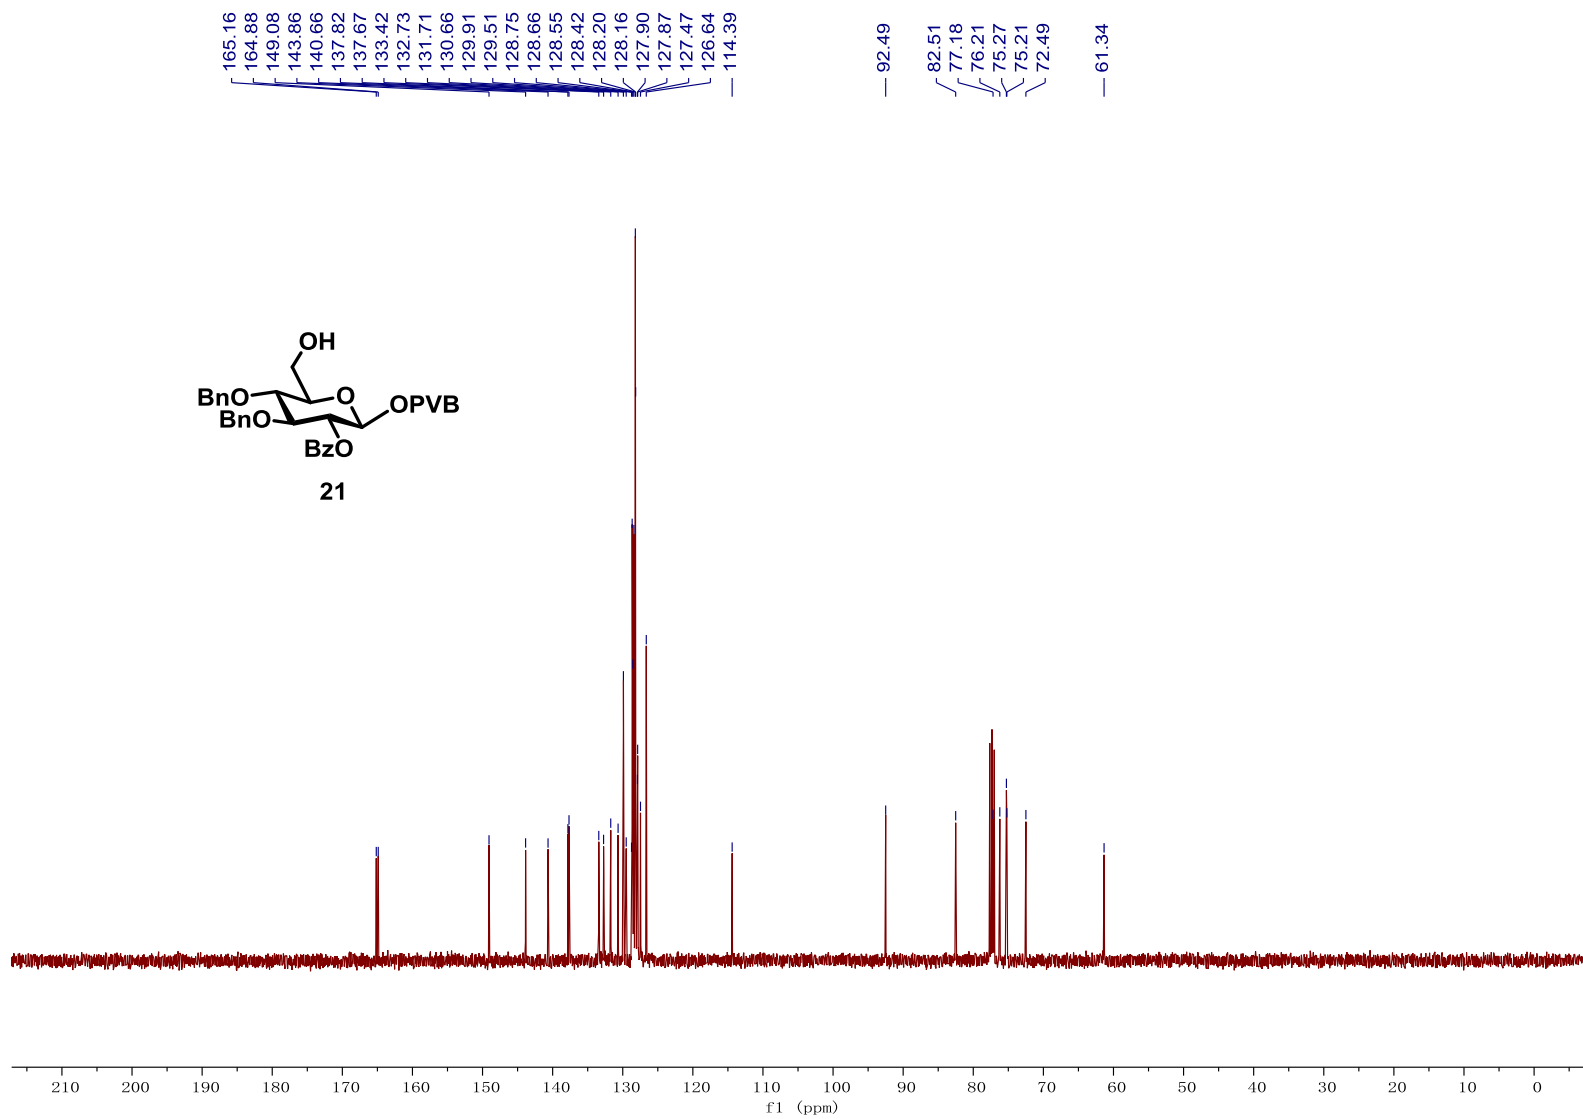

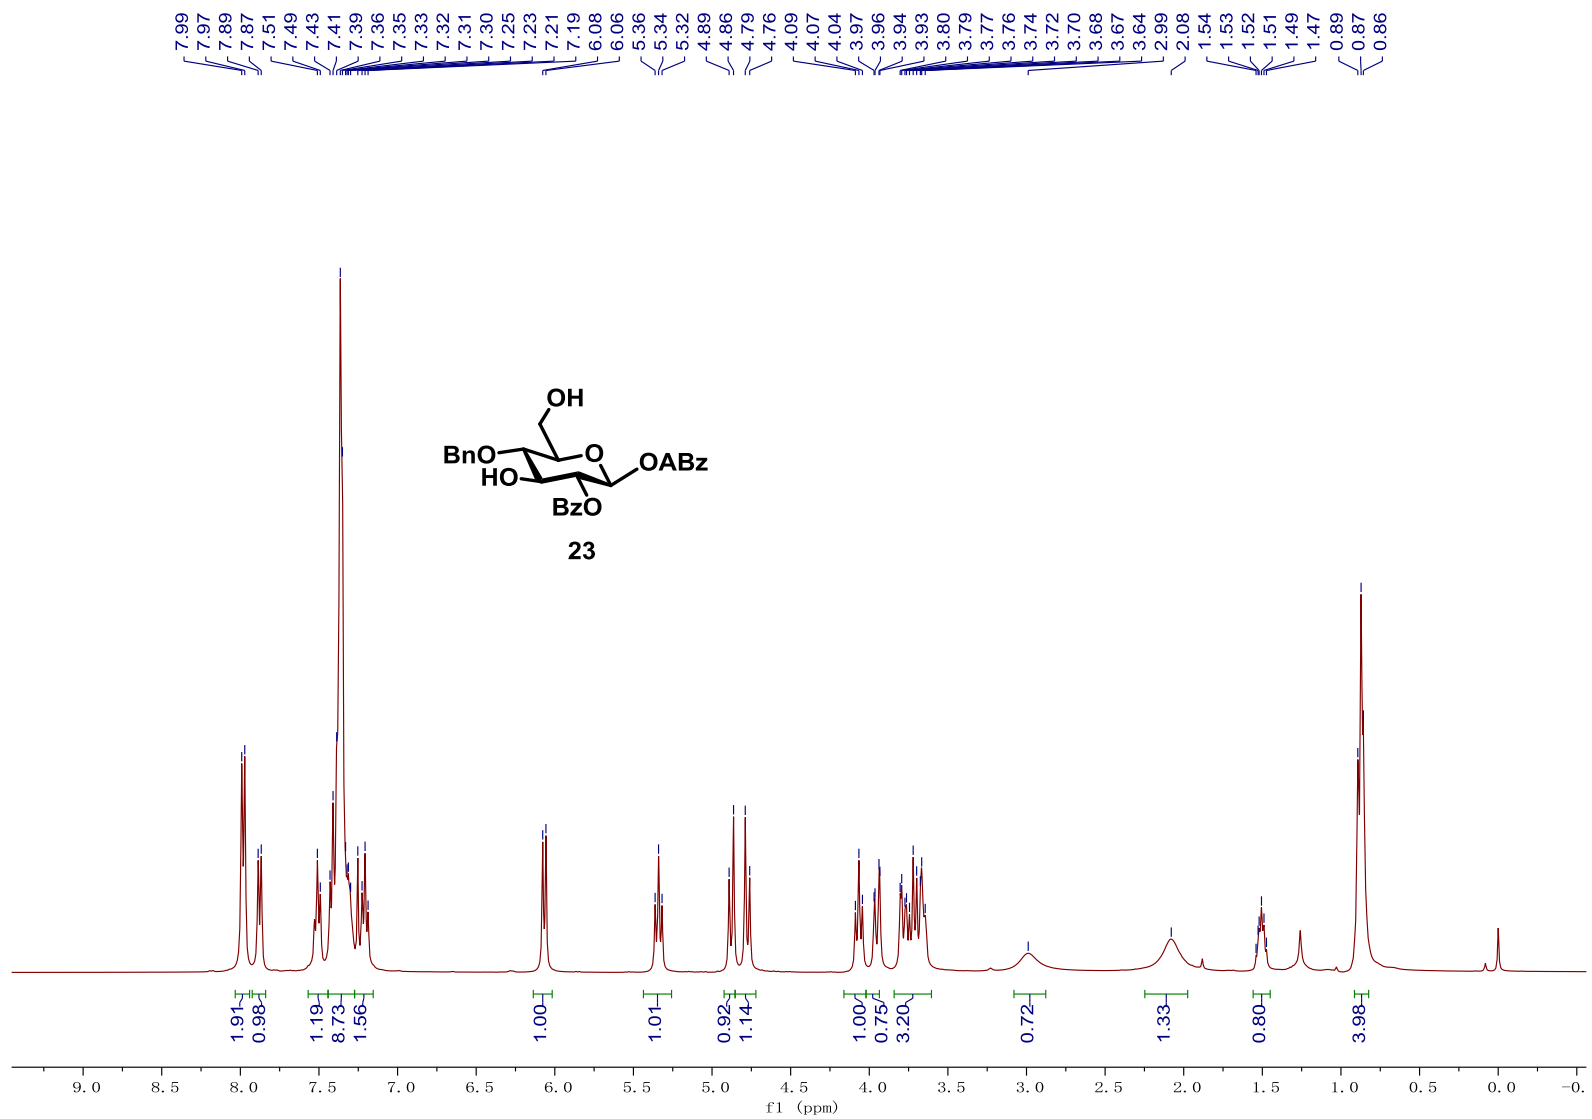

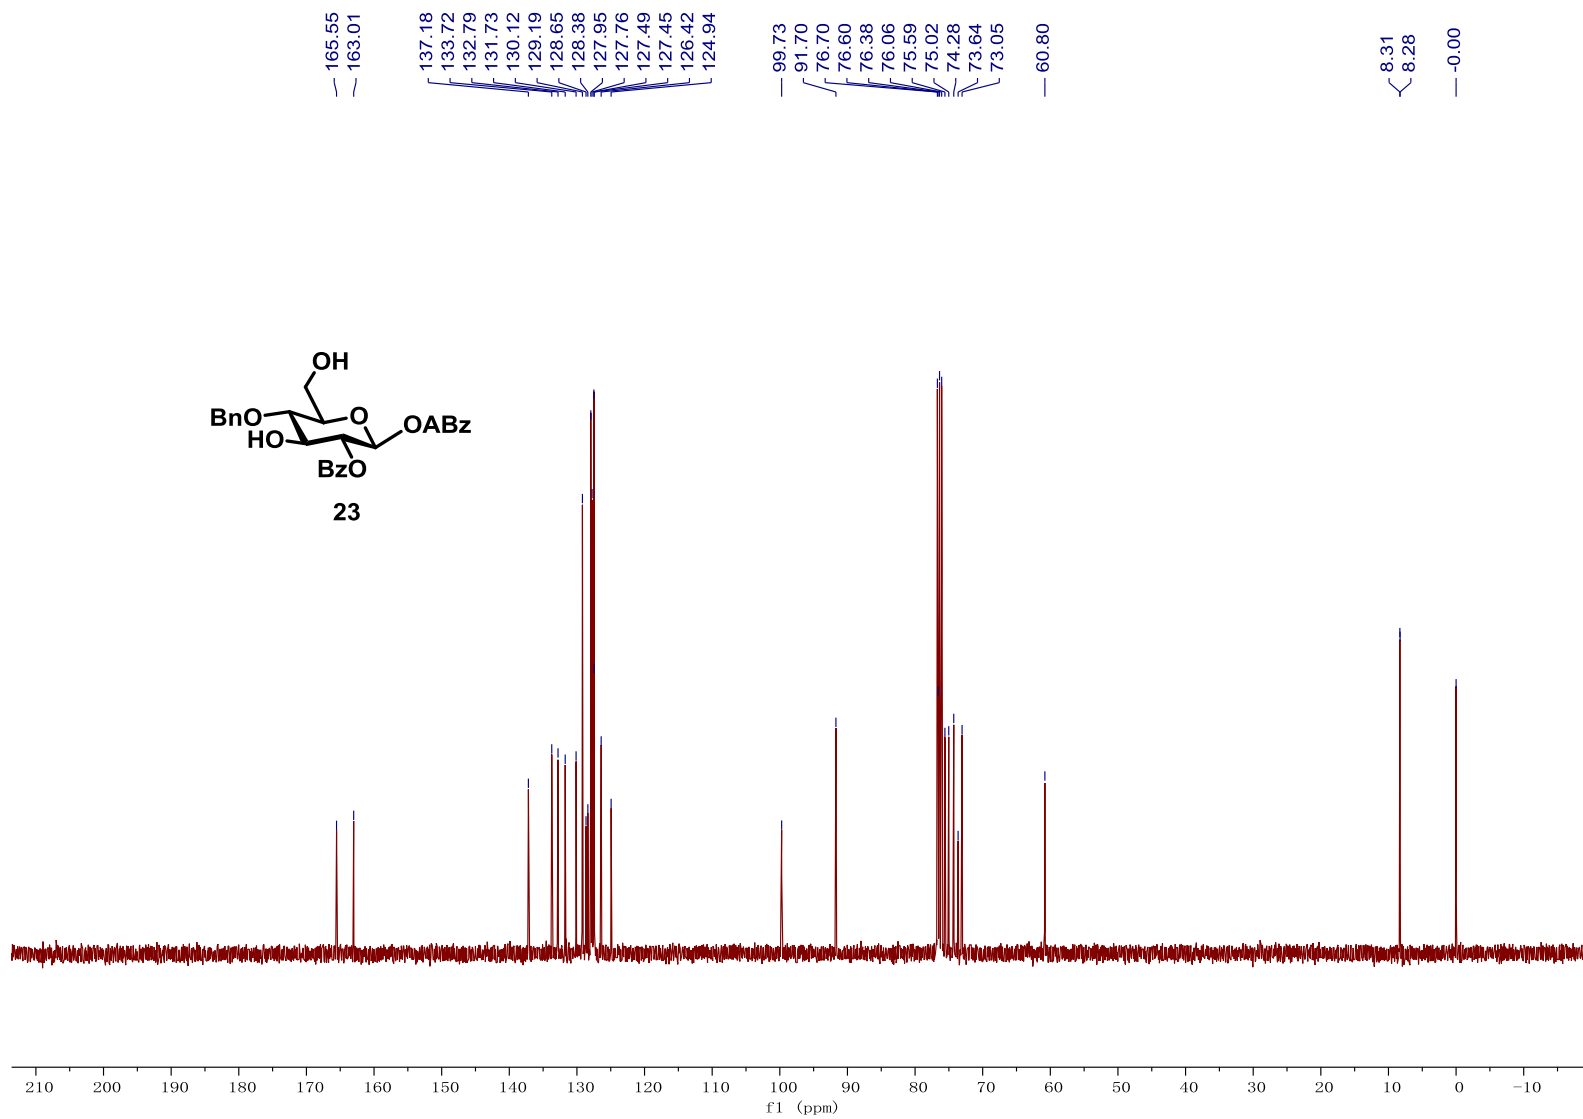

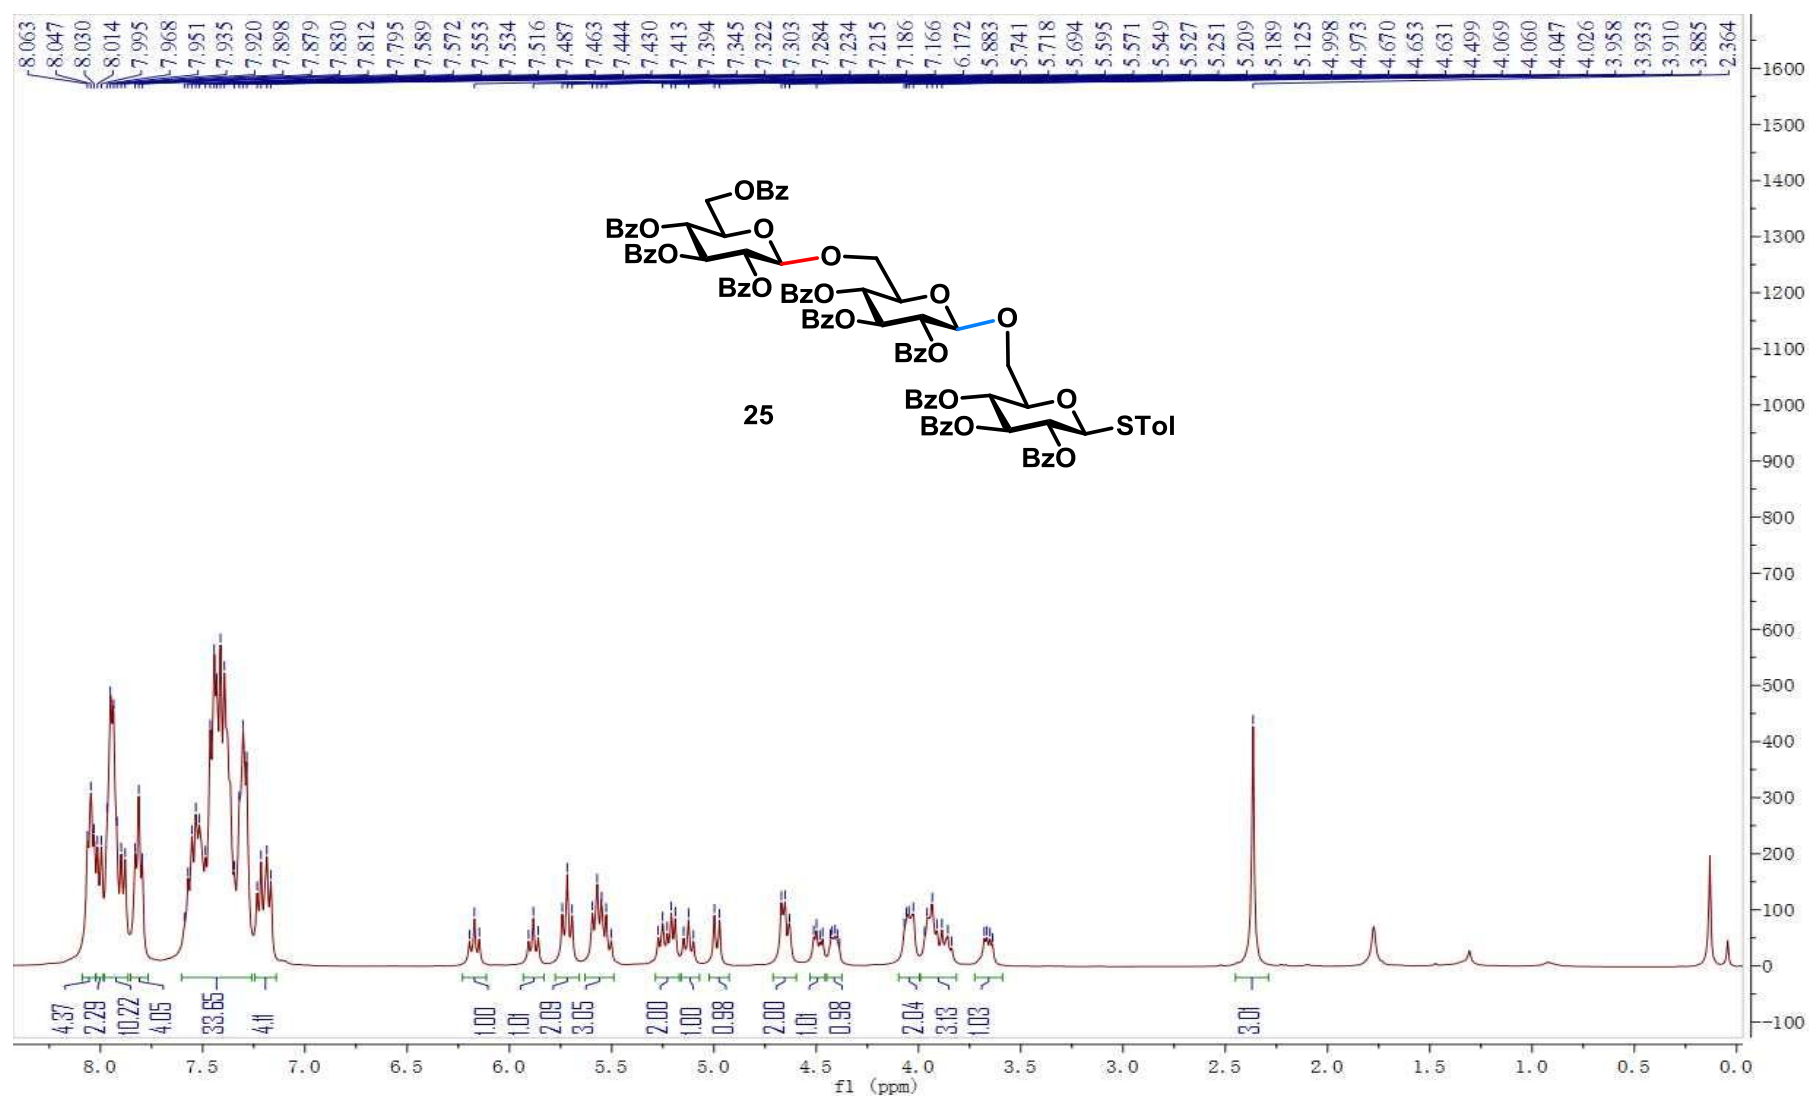



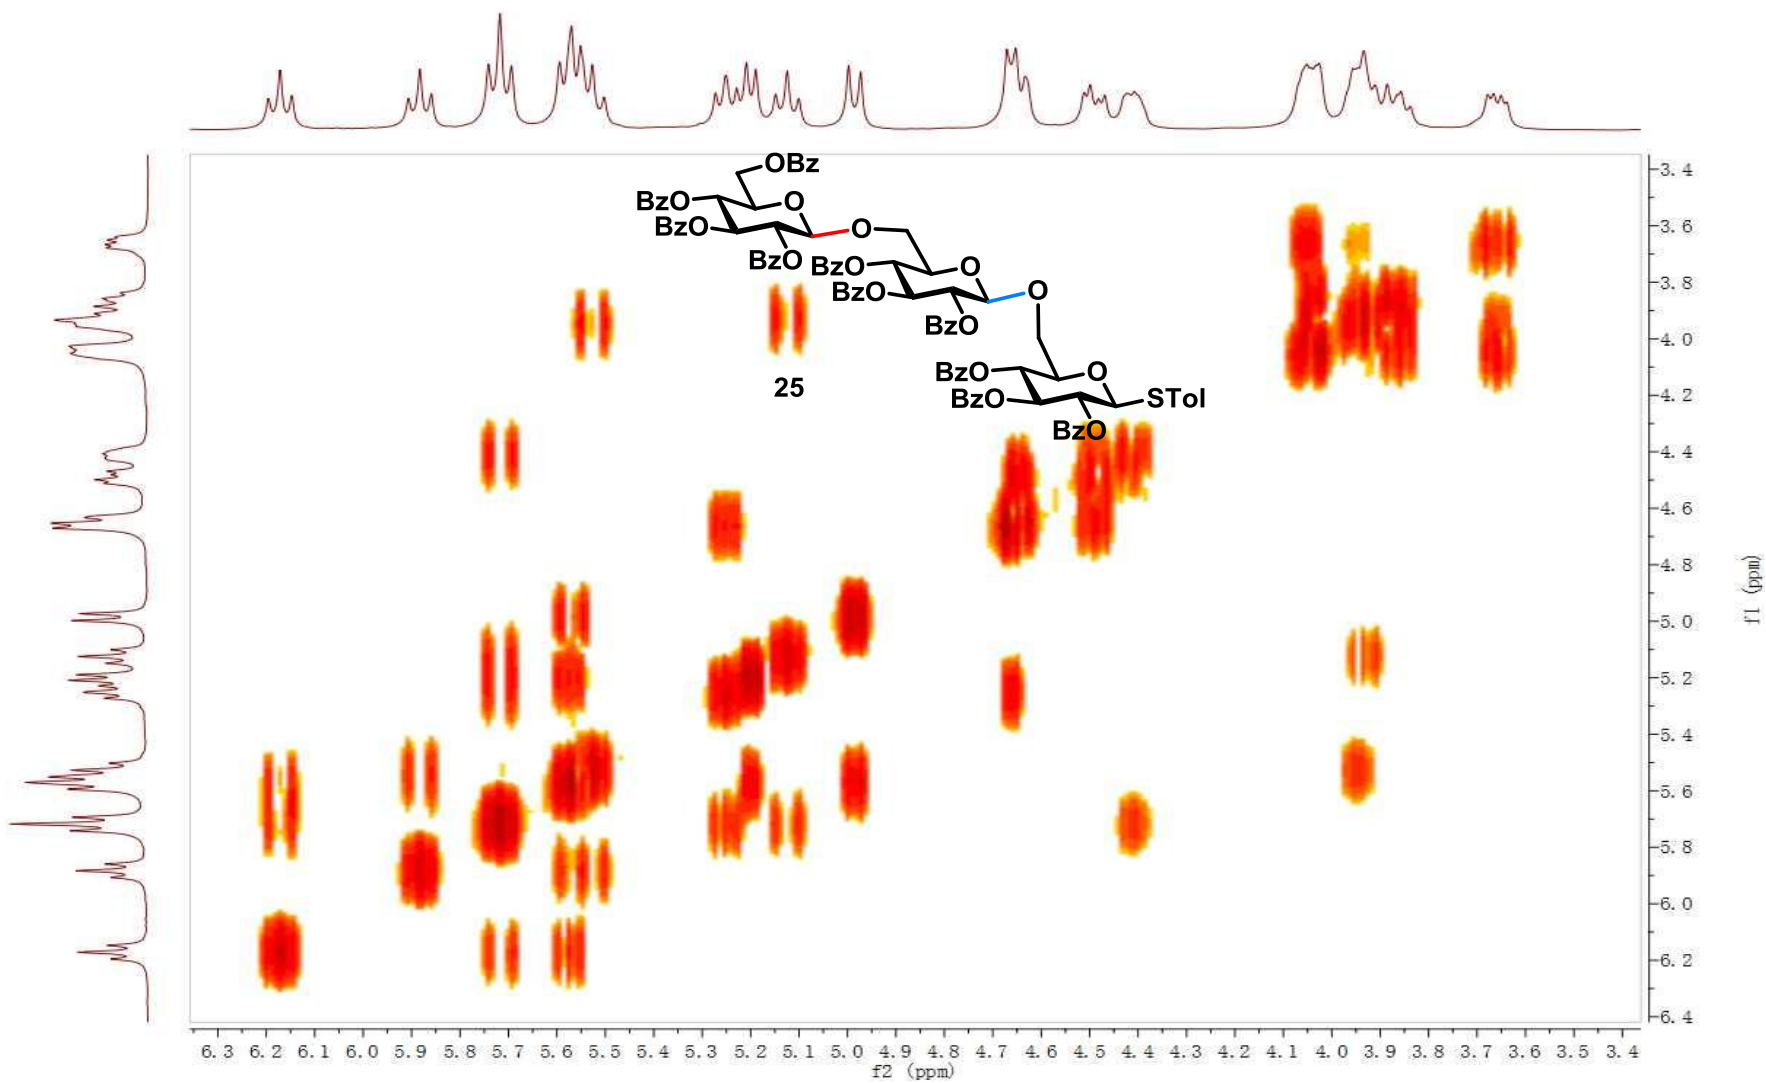





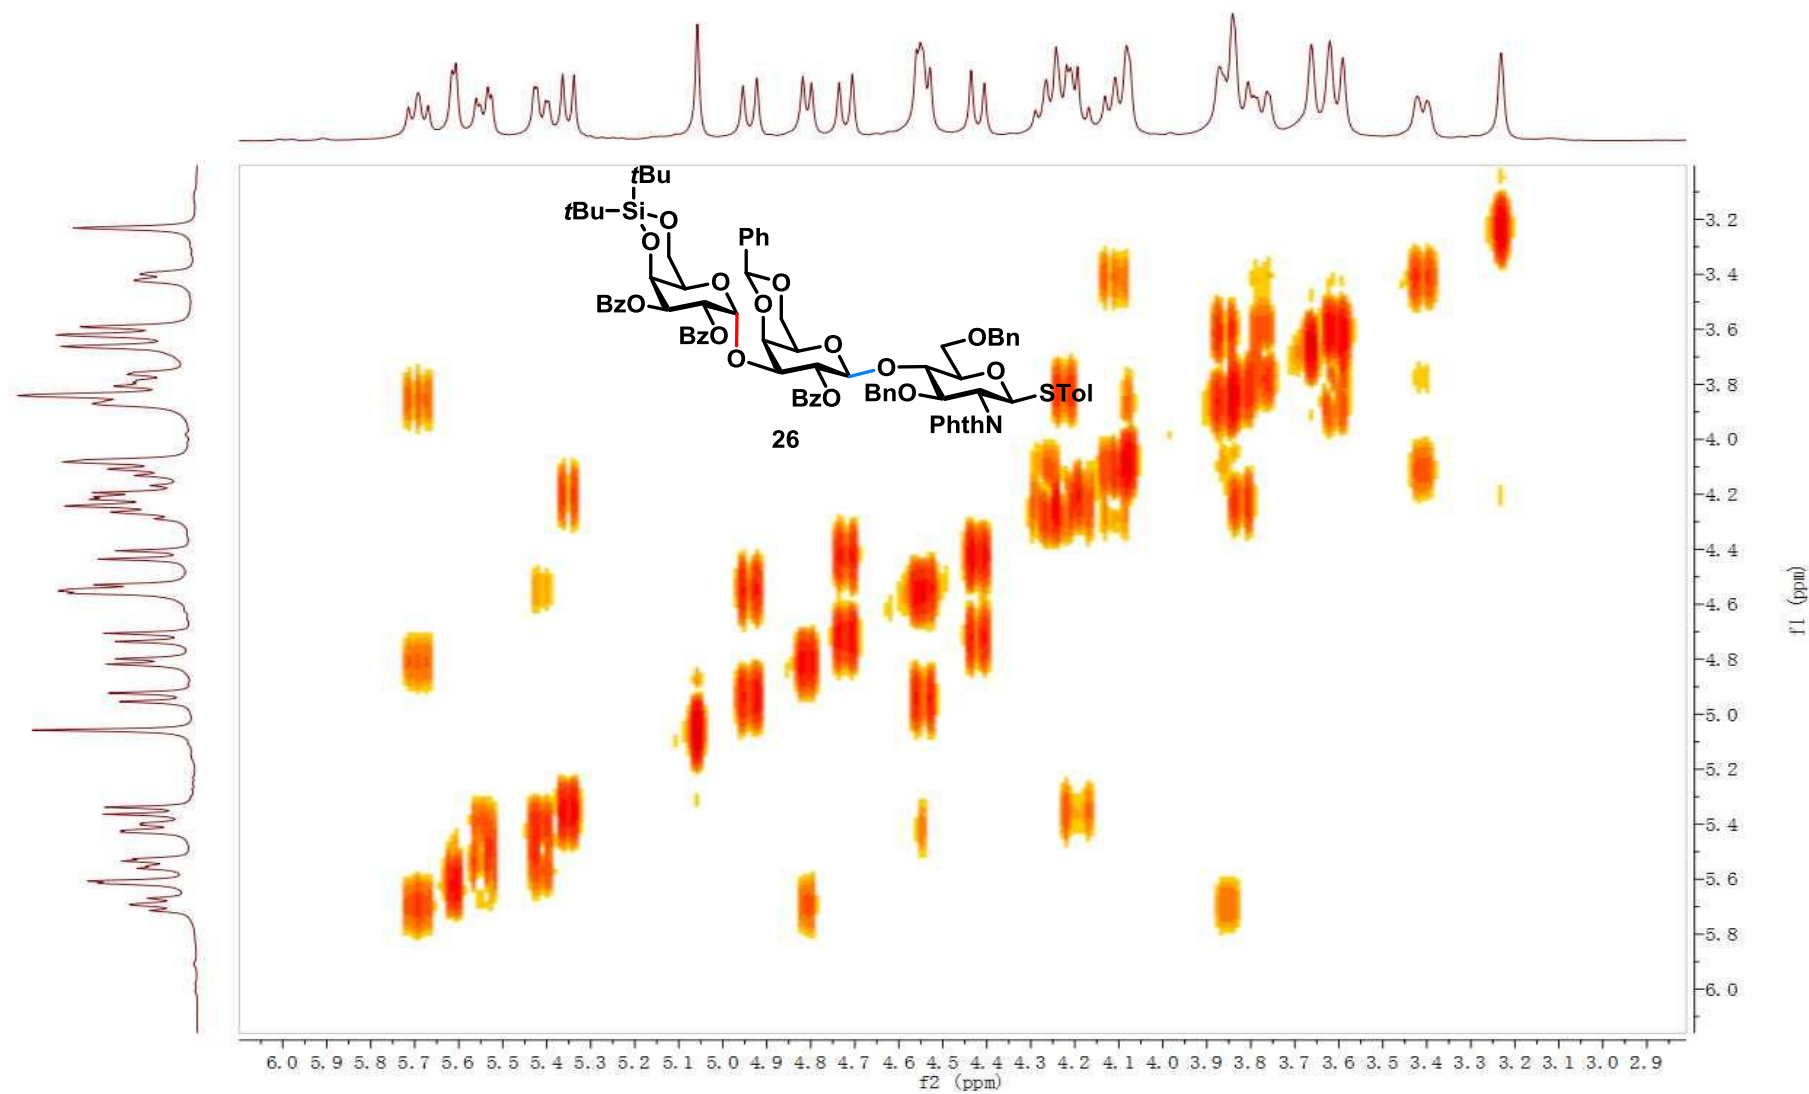

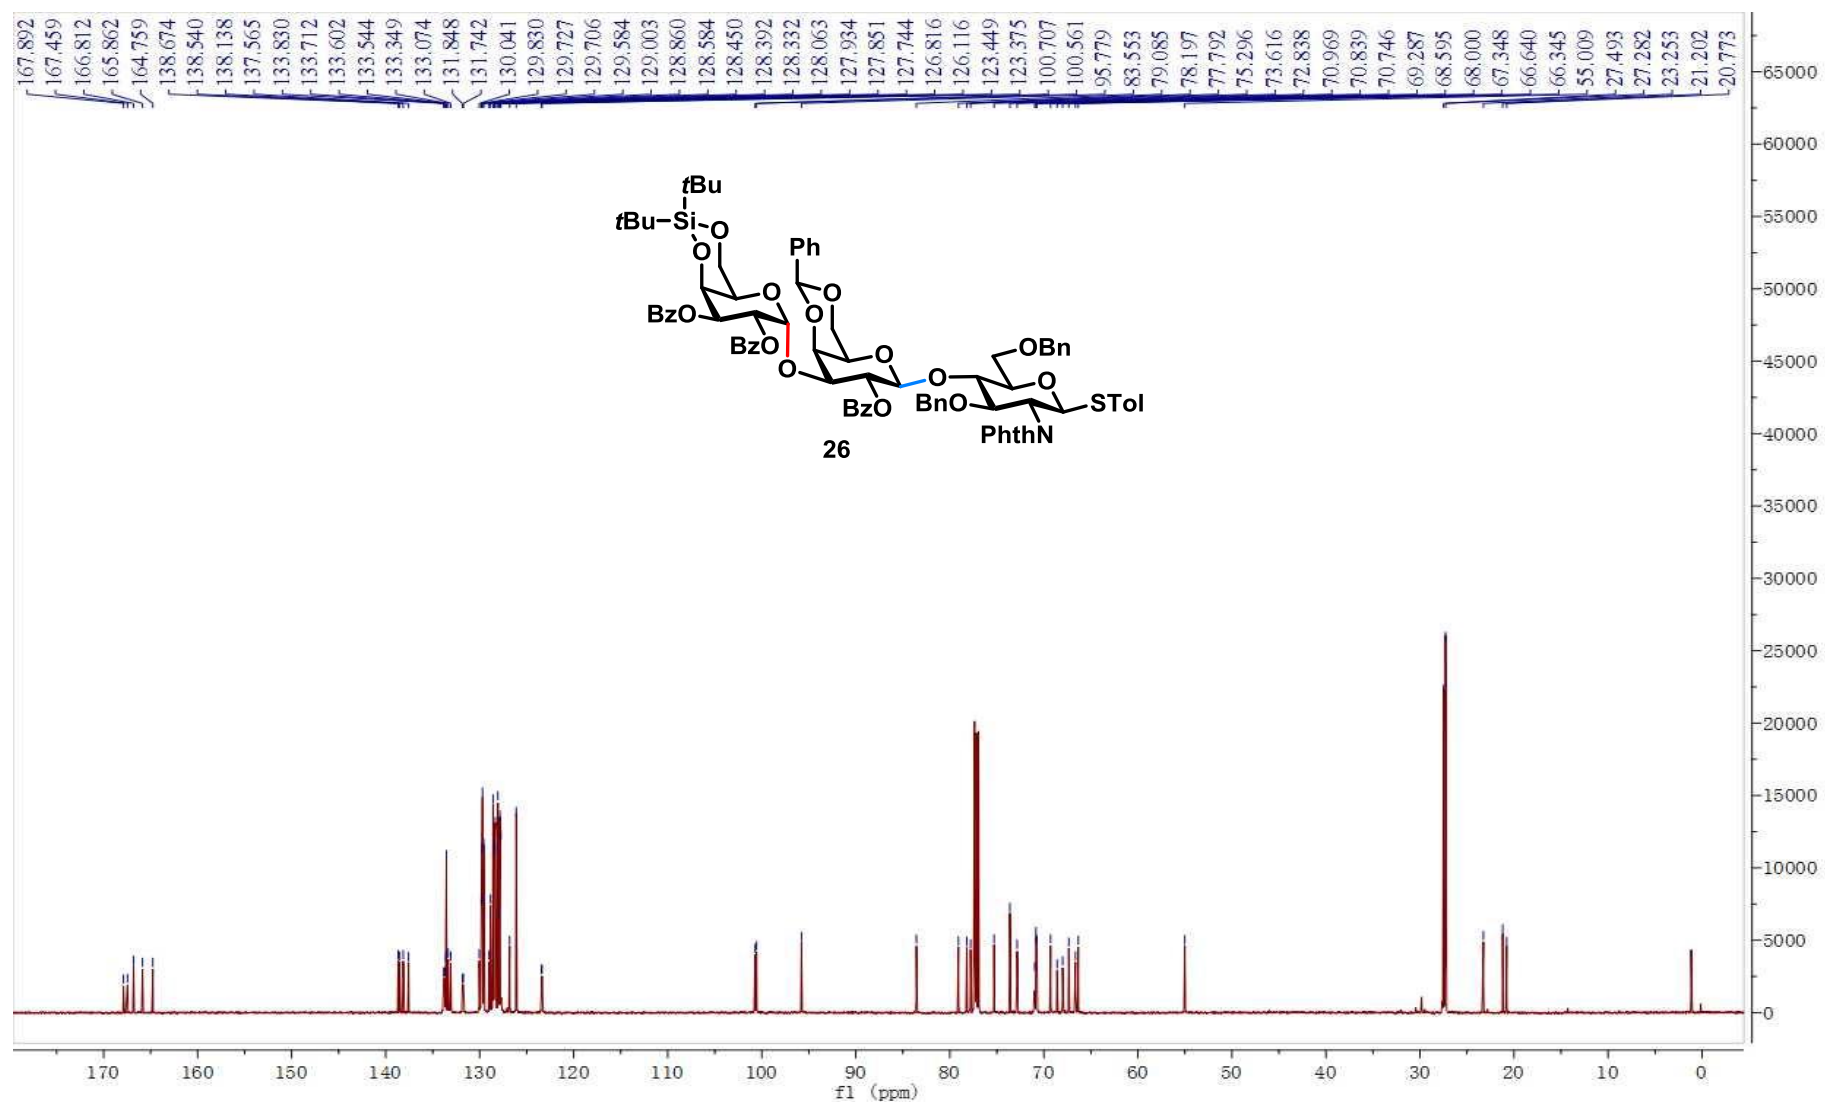

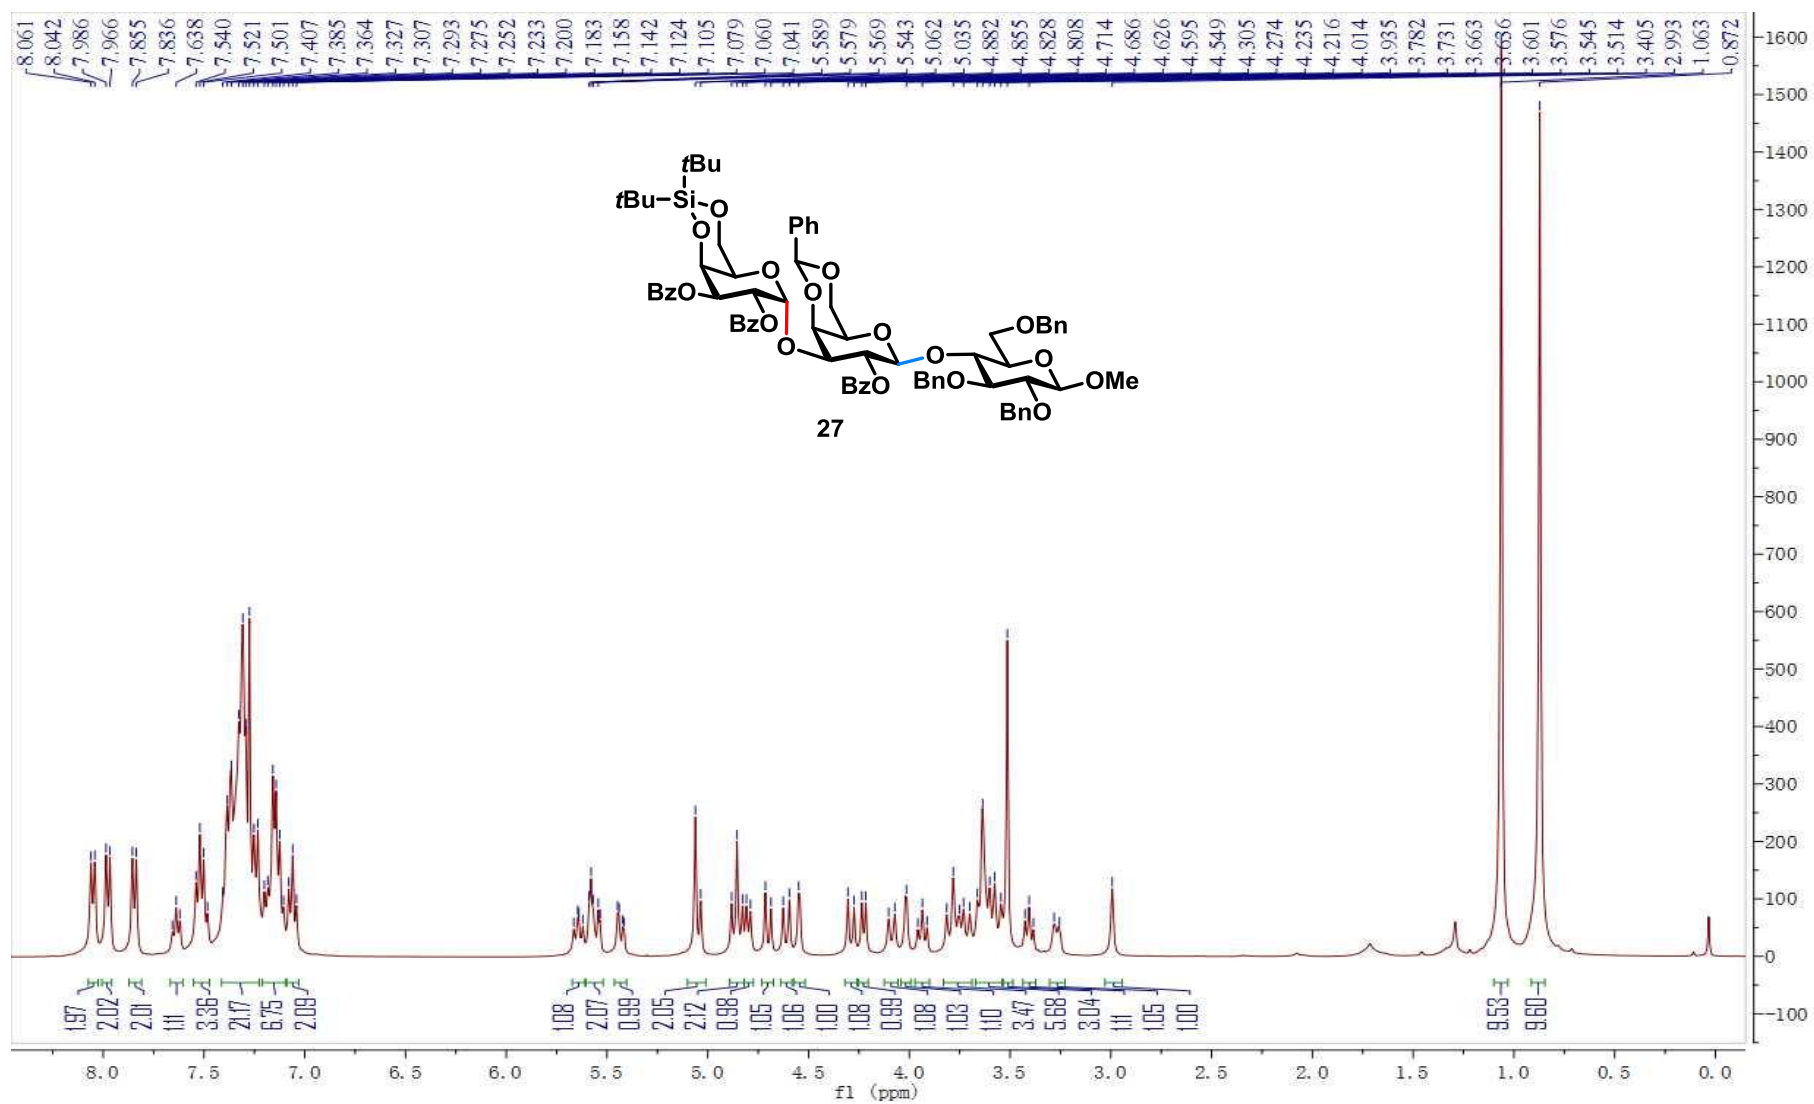



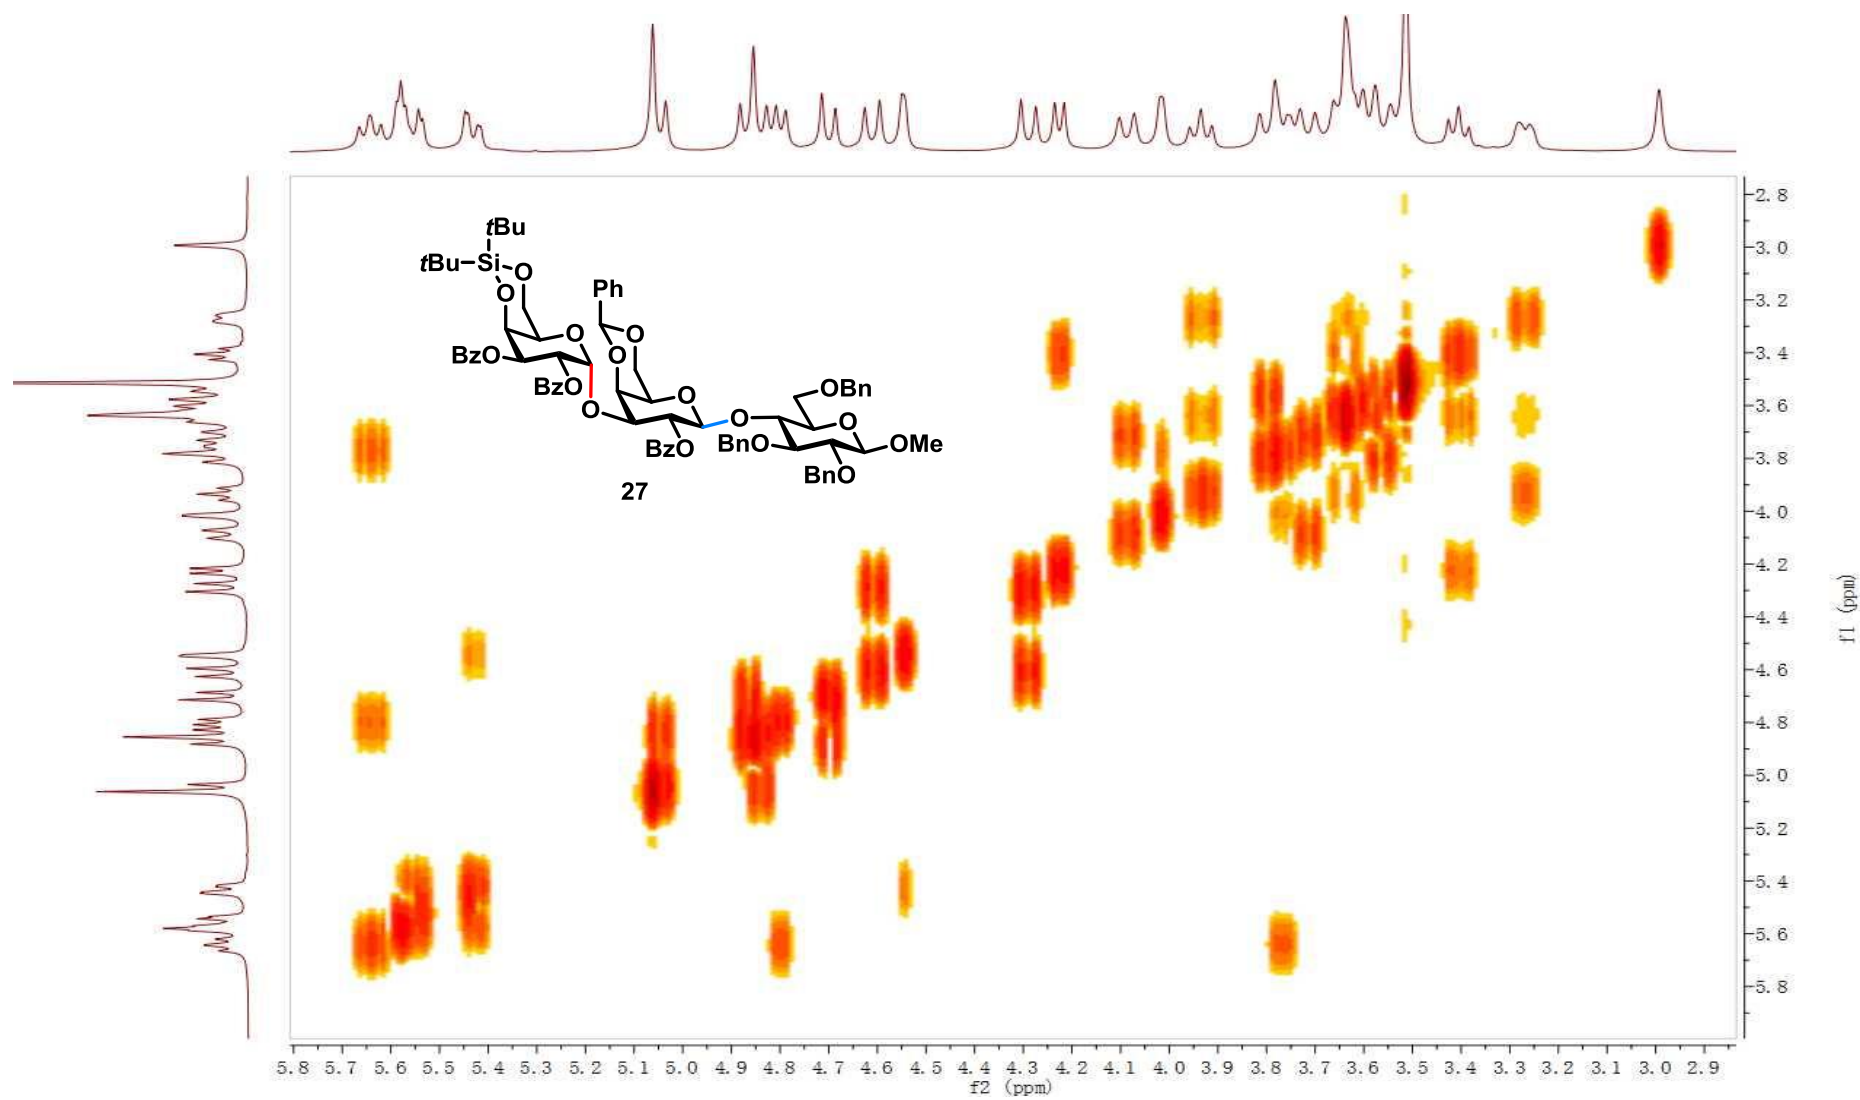

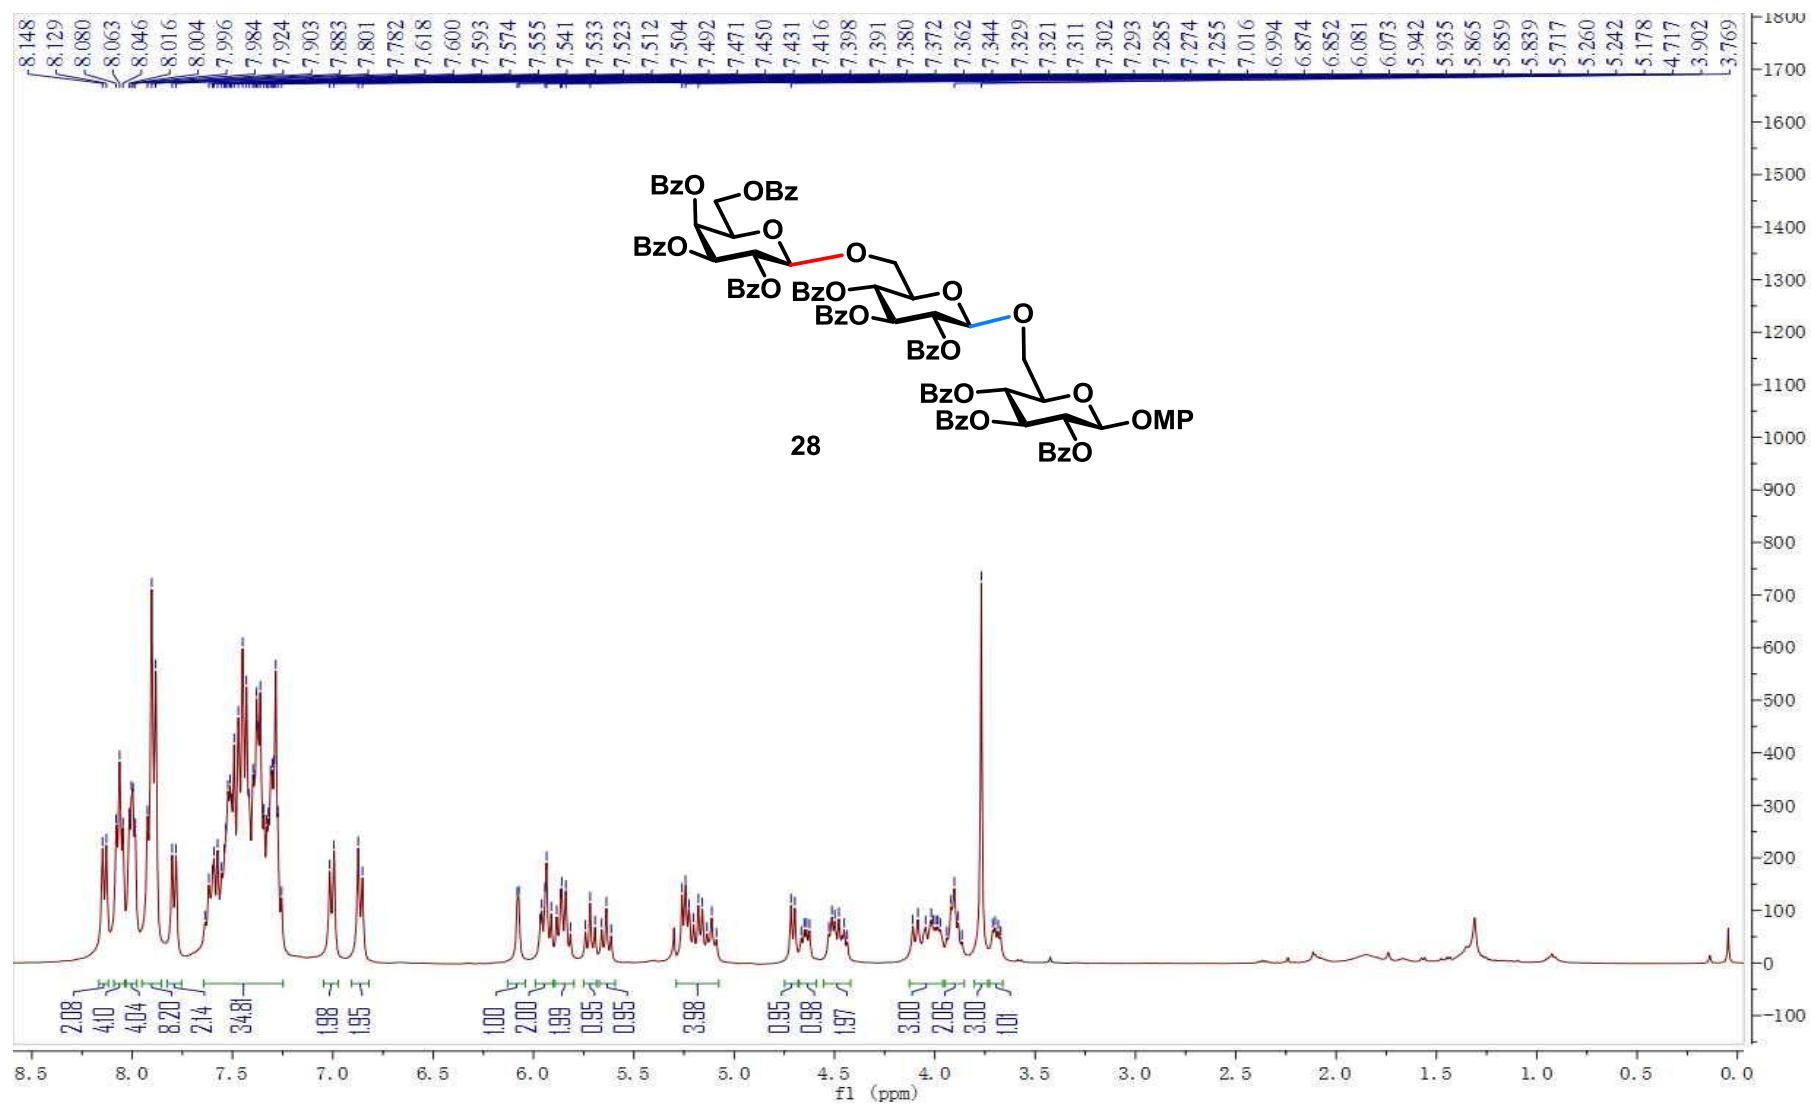



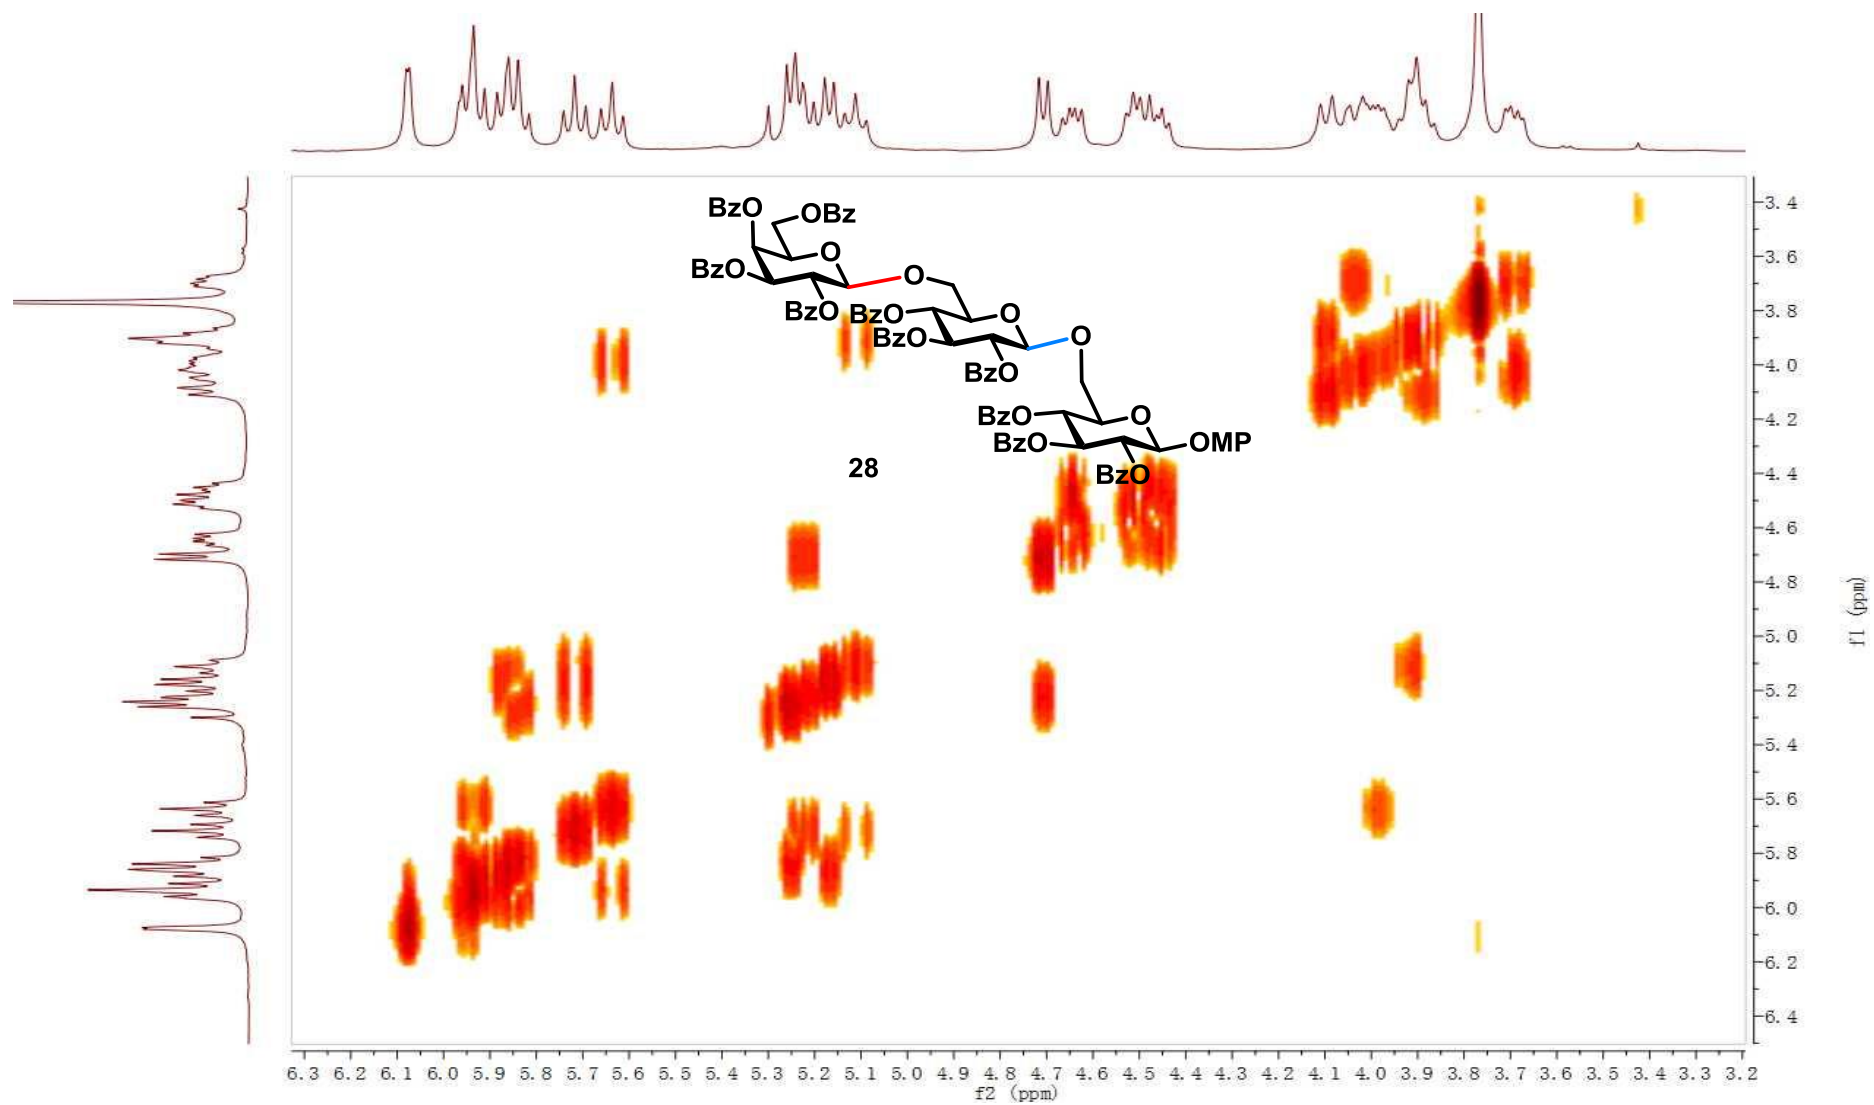

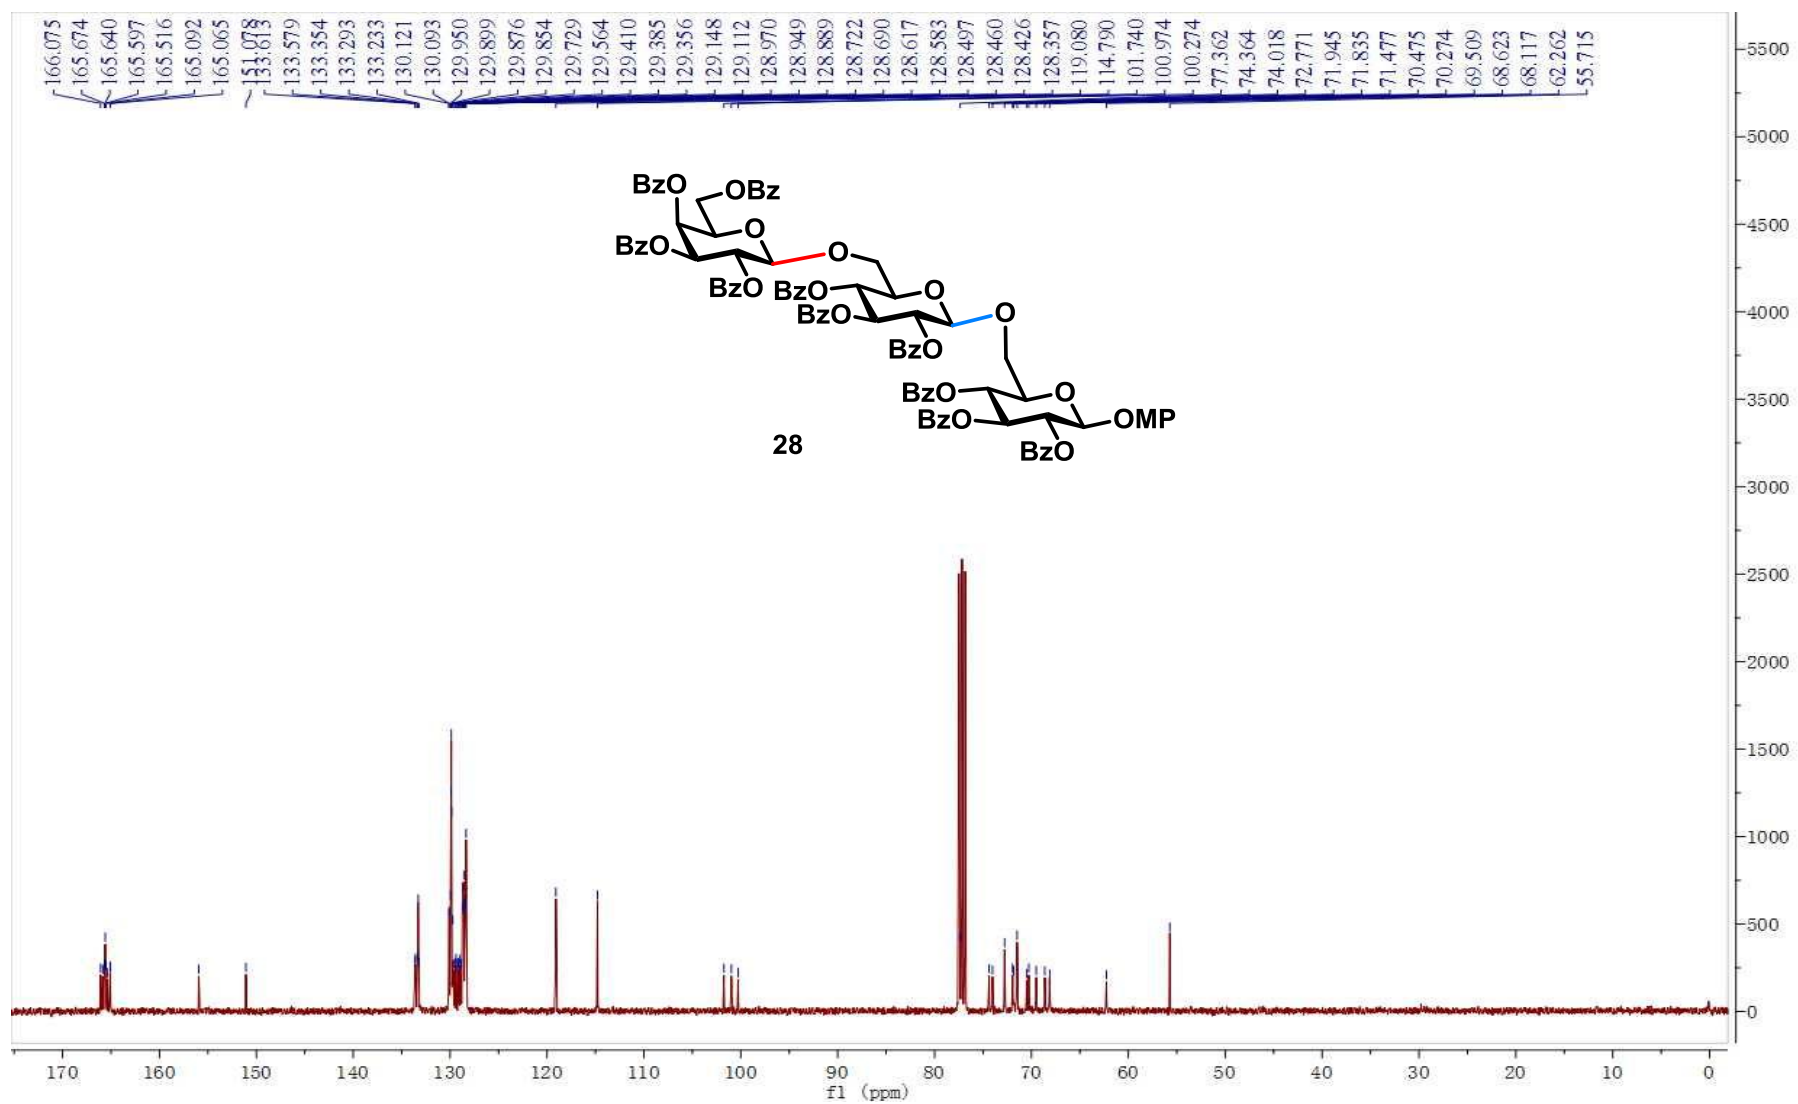

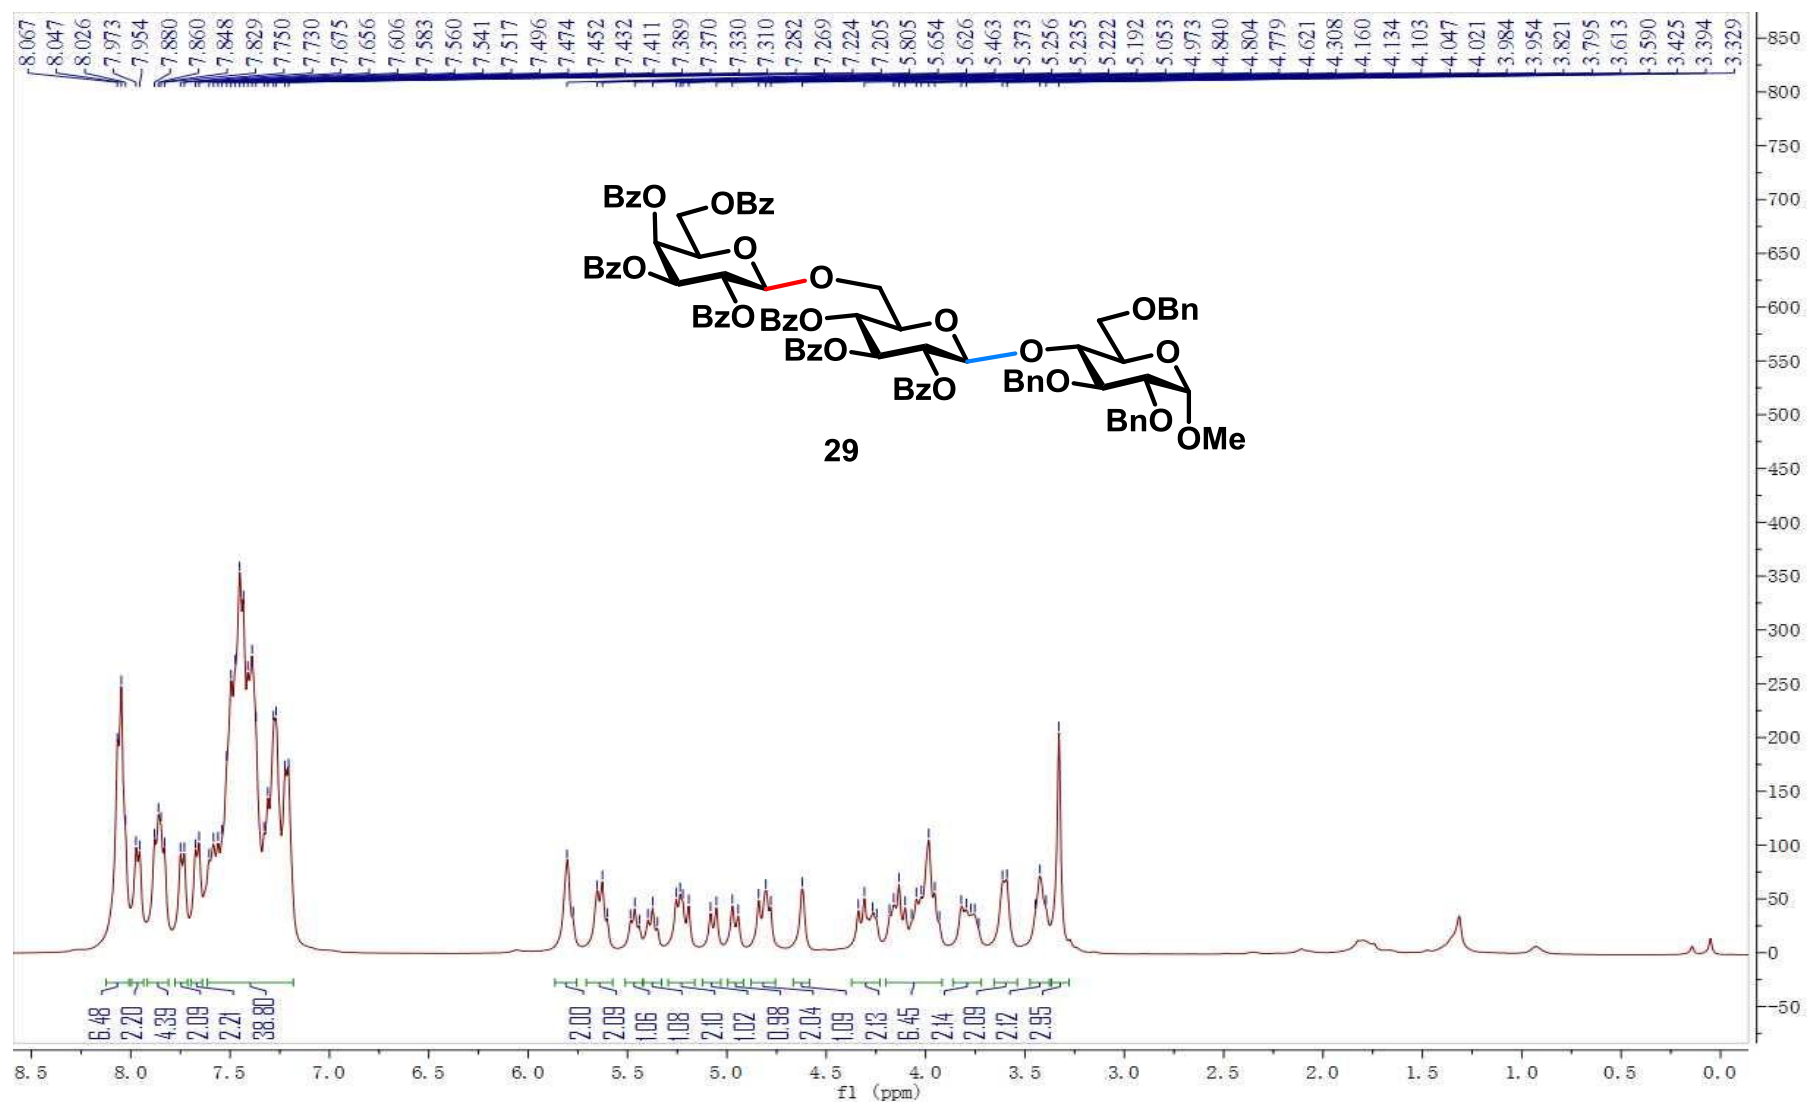

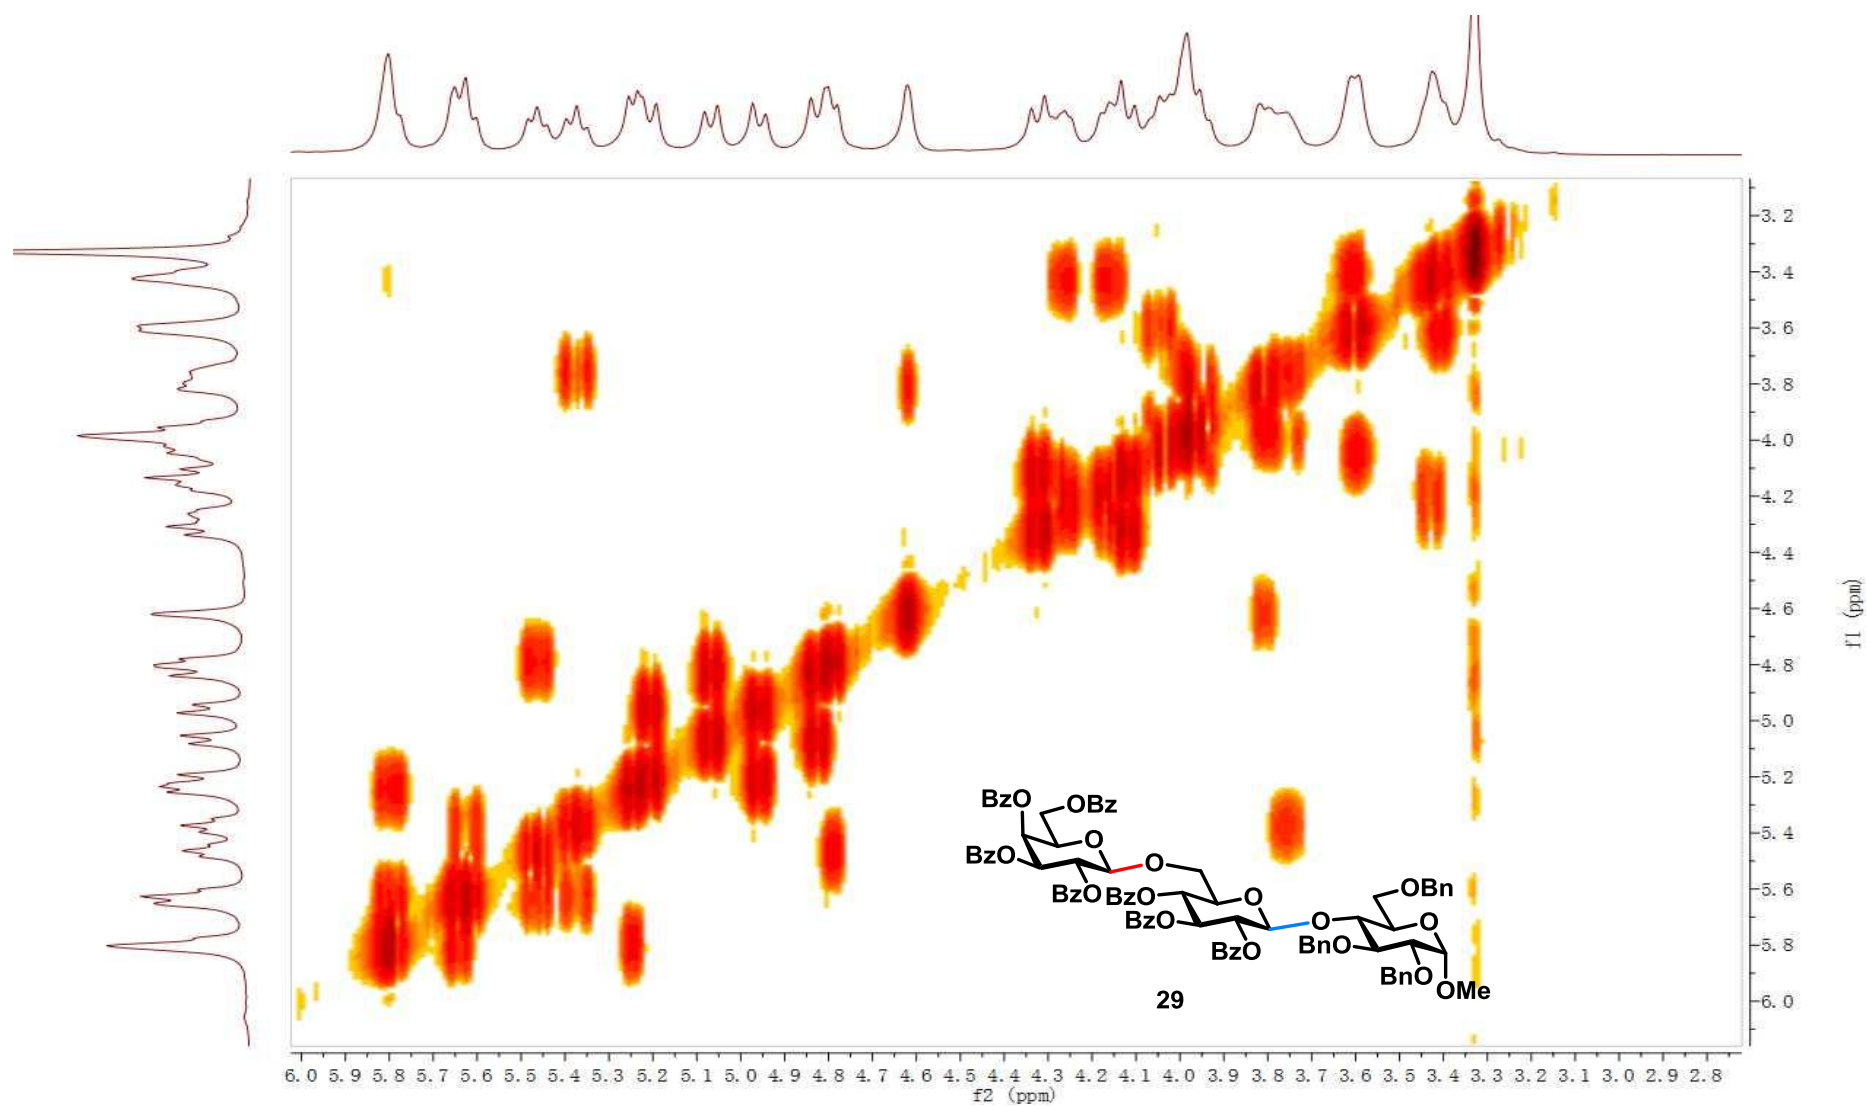

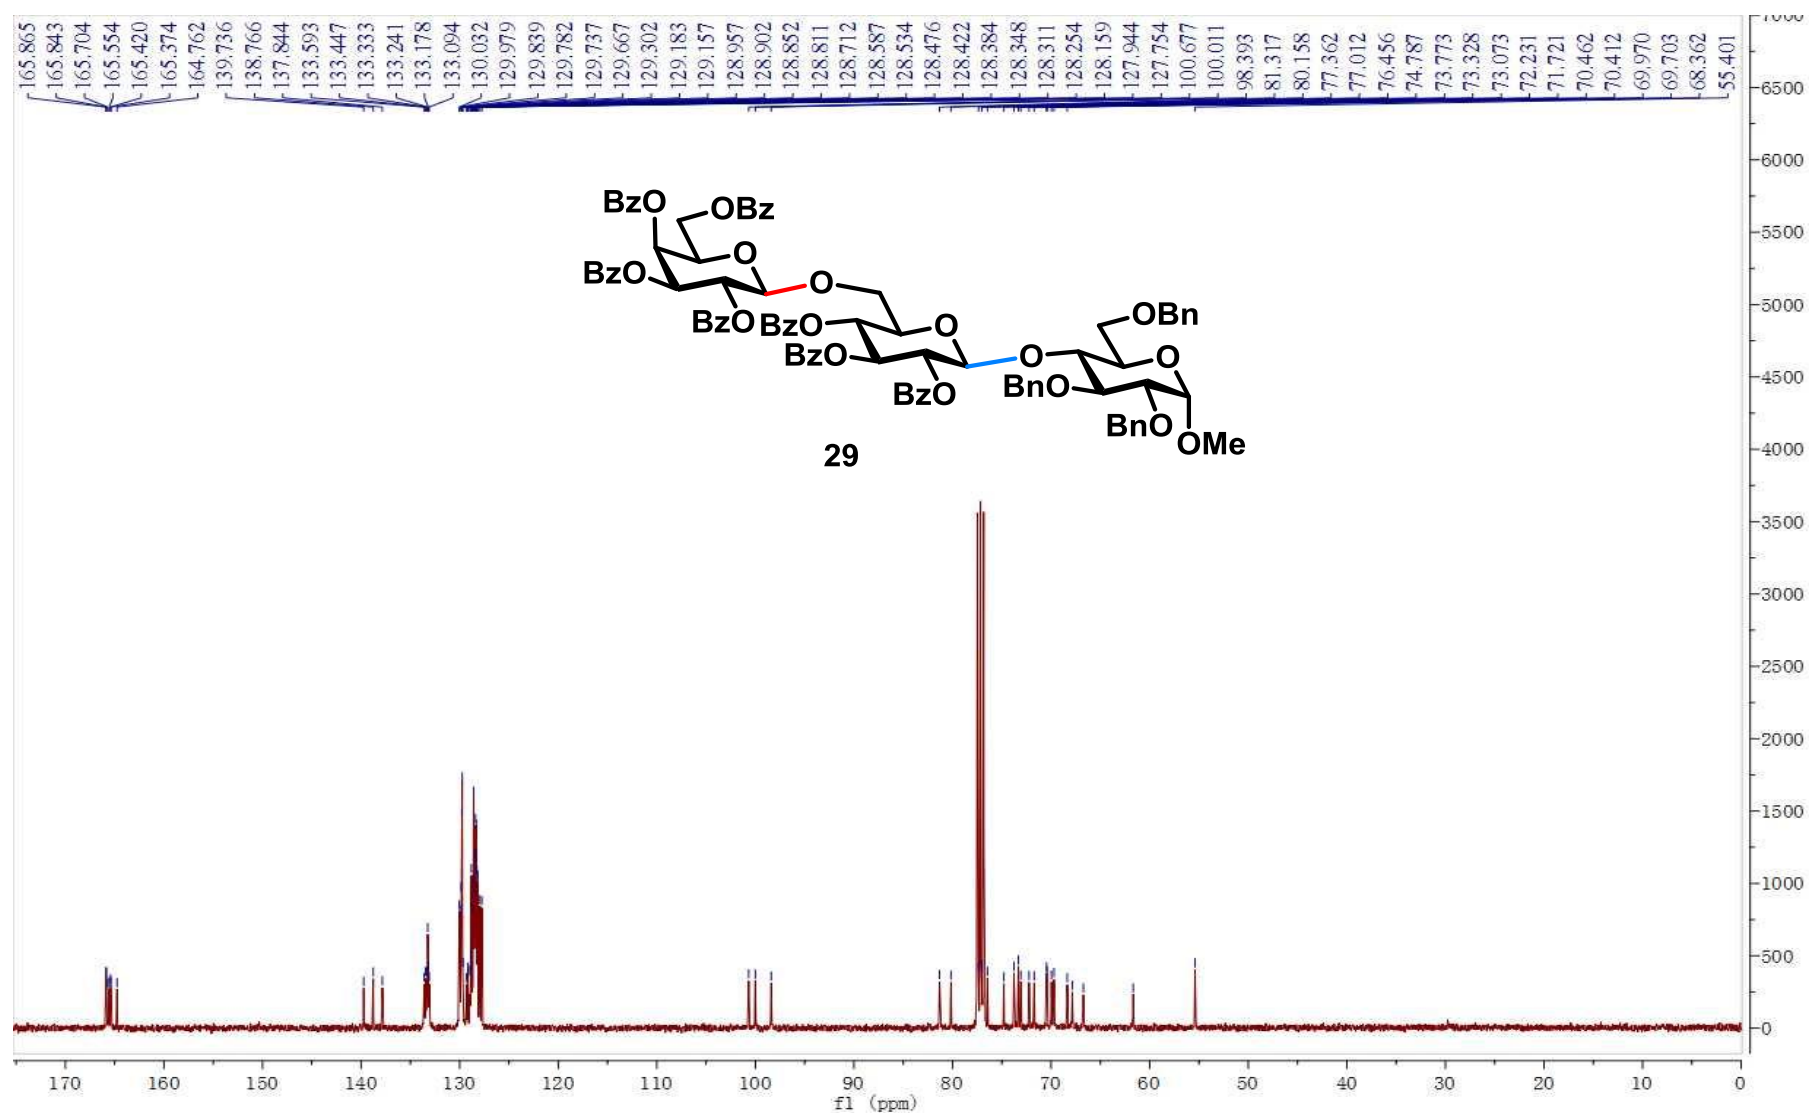

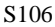

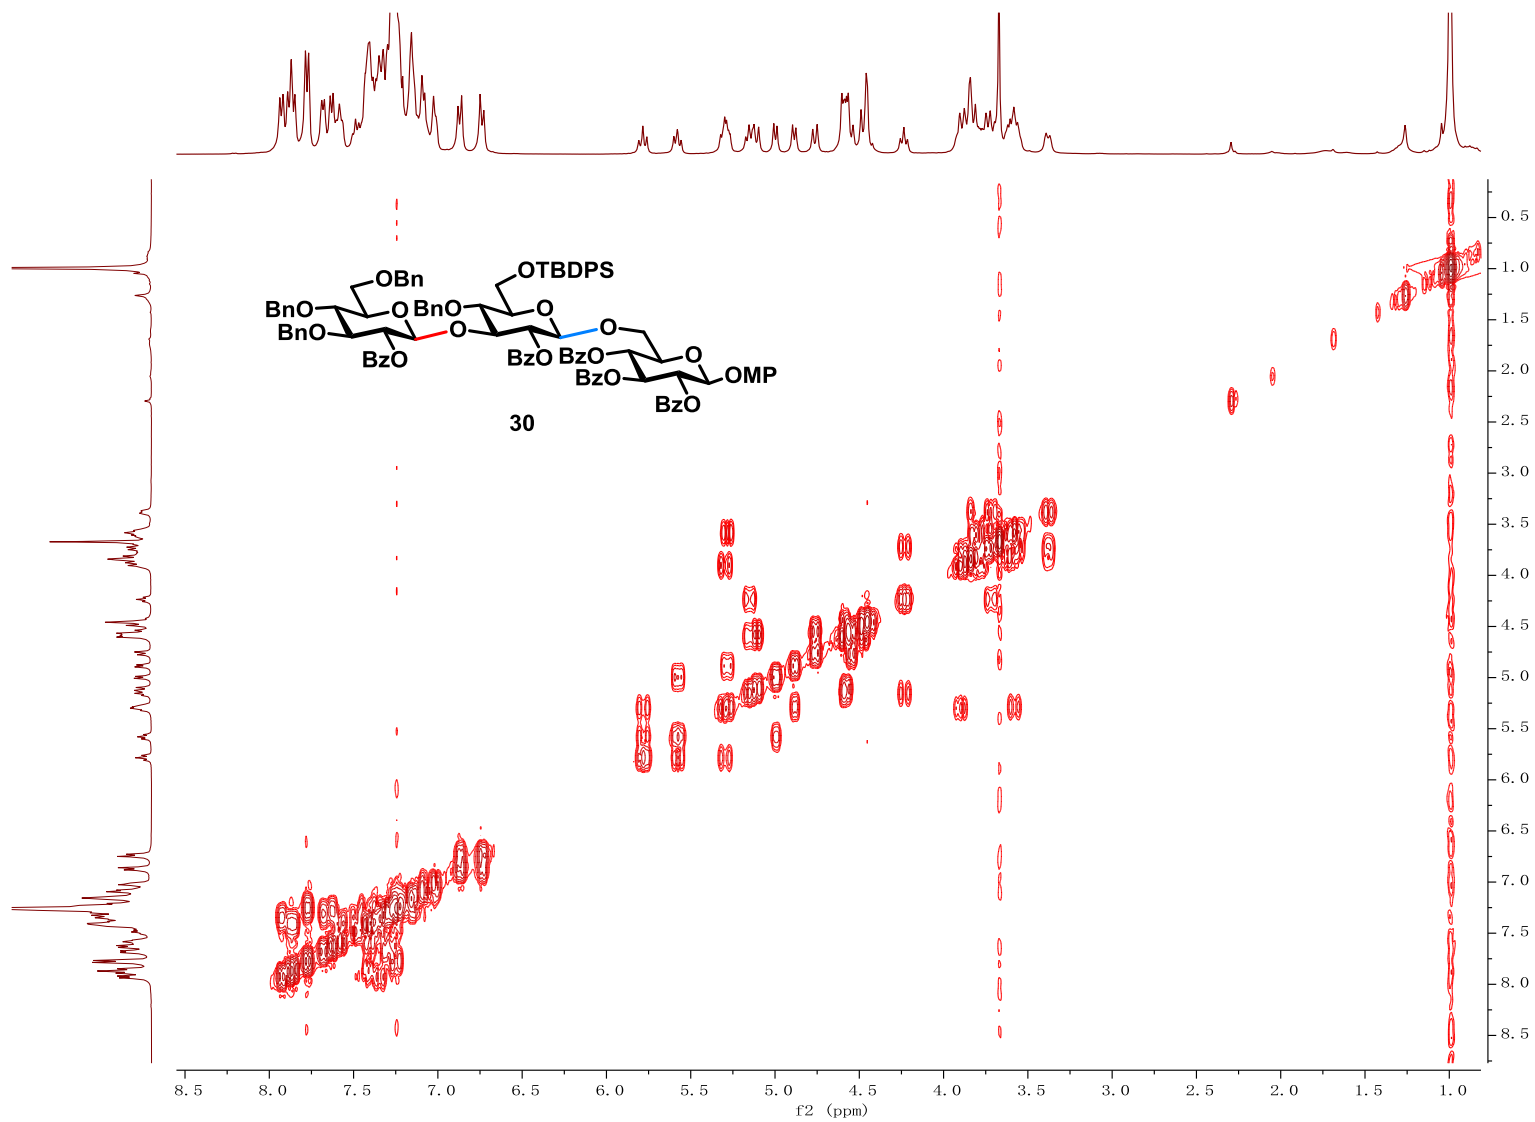

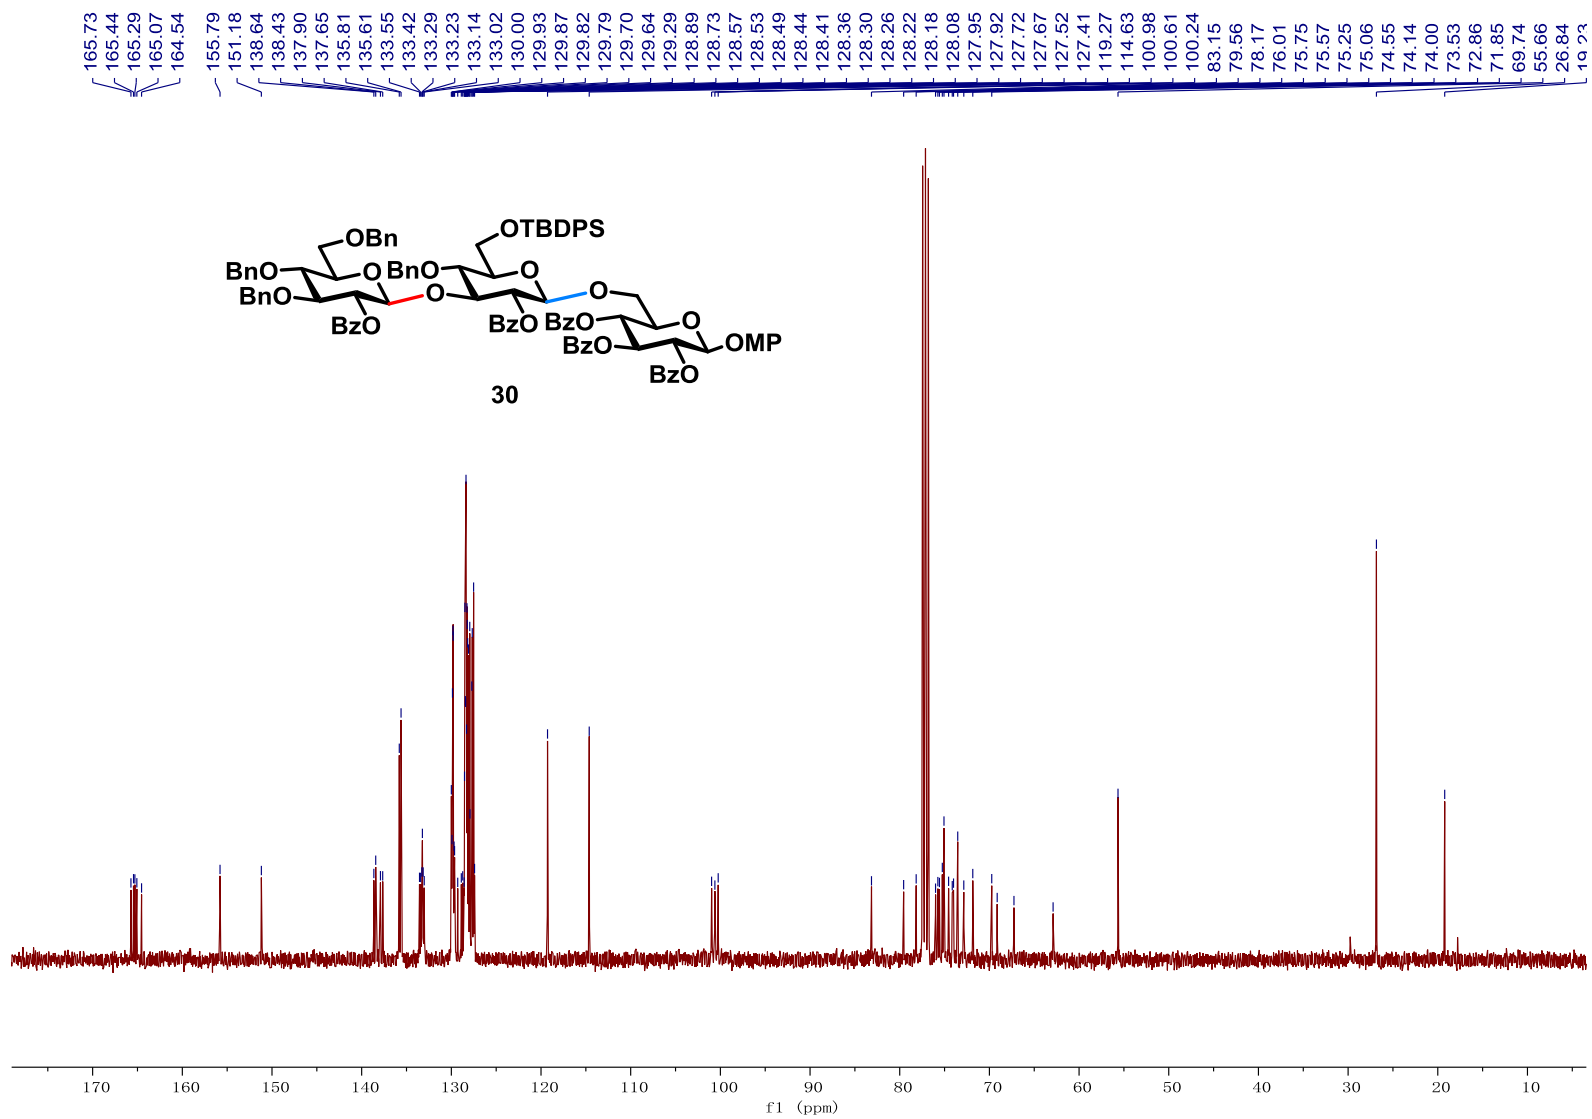

S108





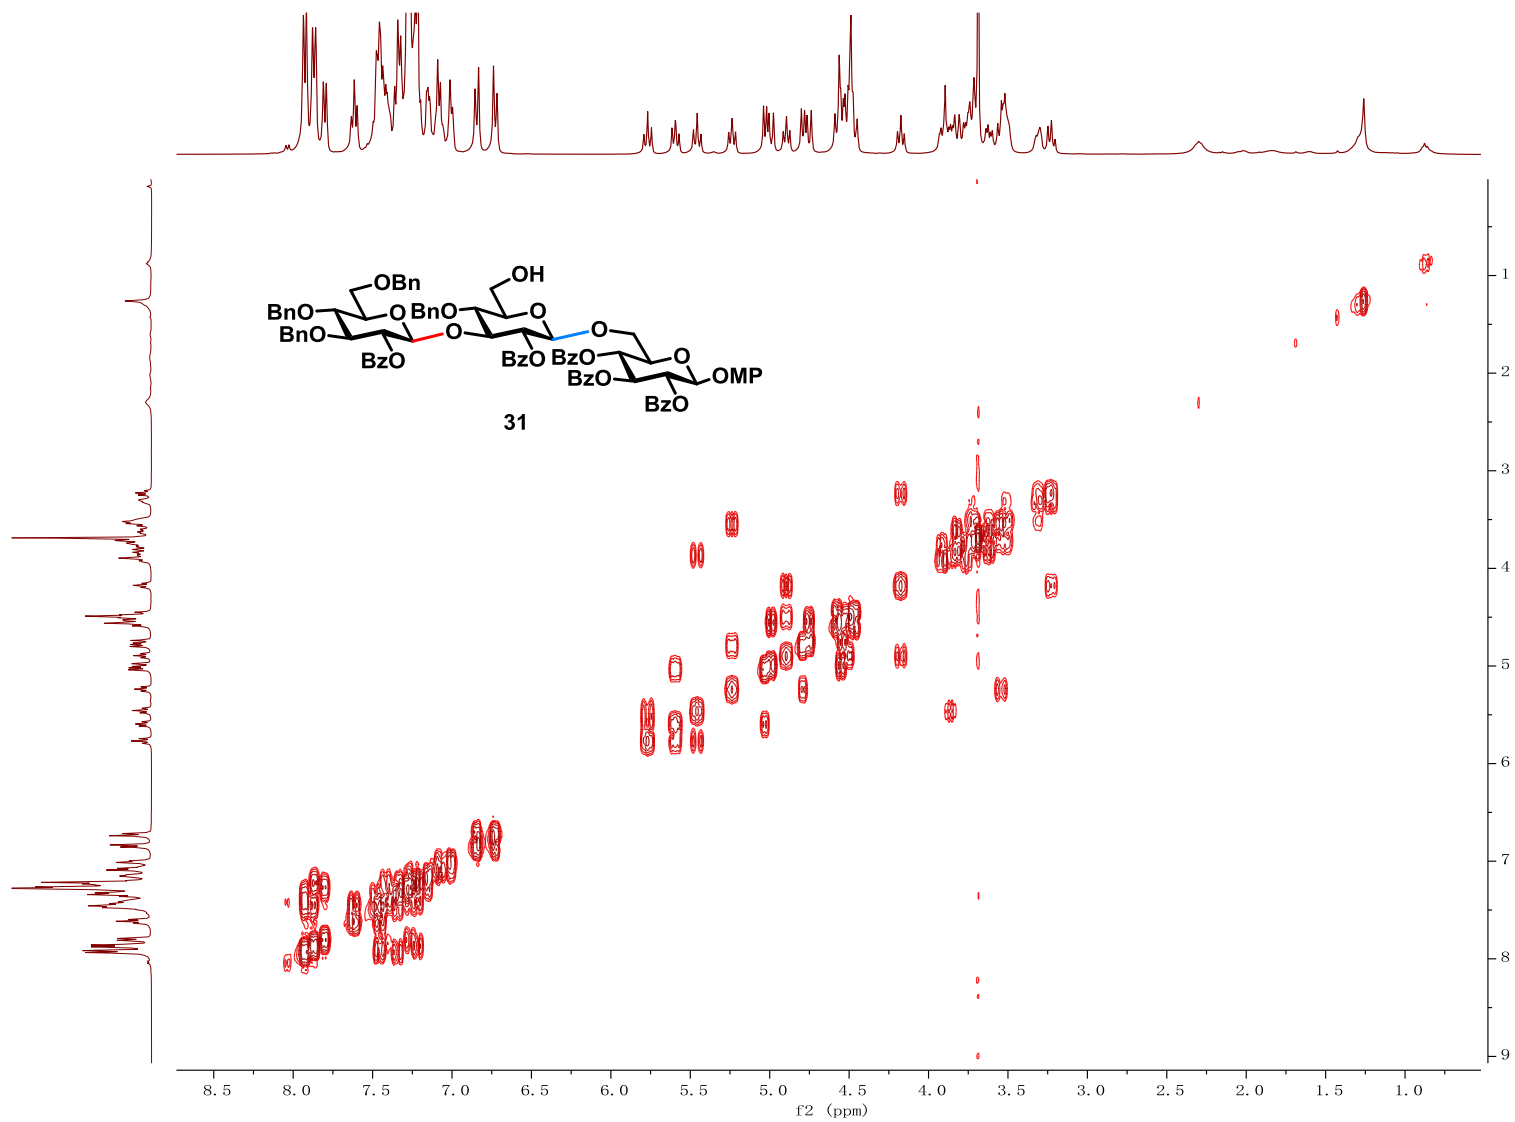

S110

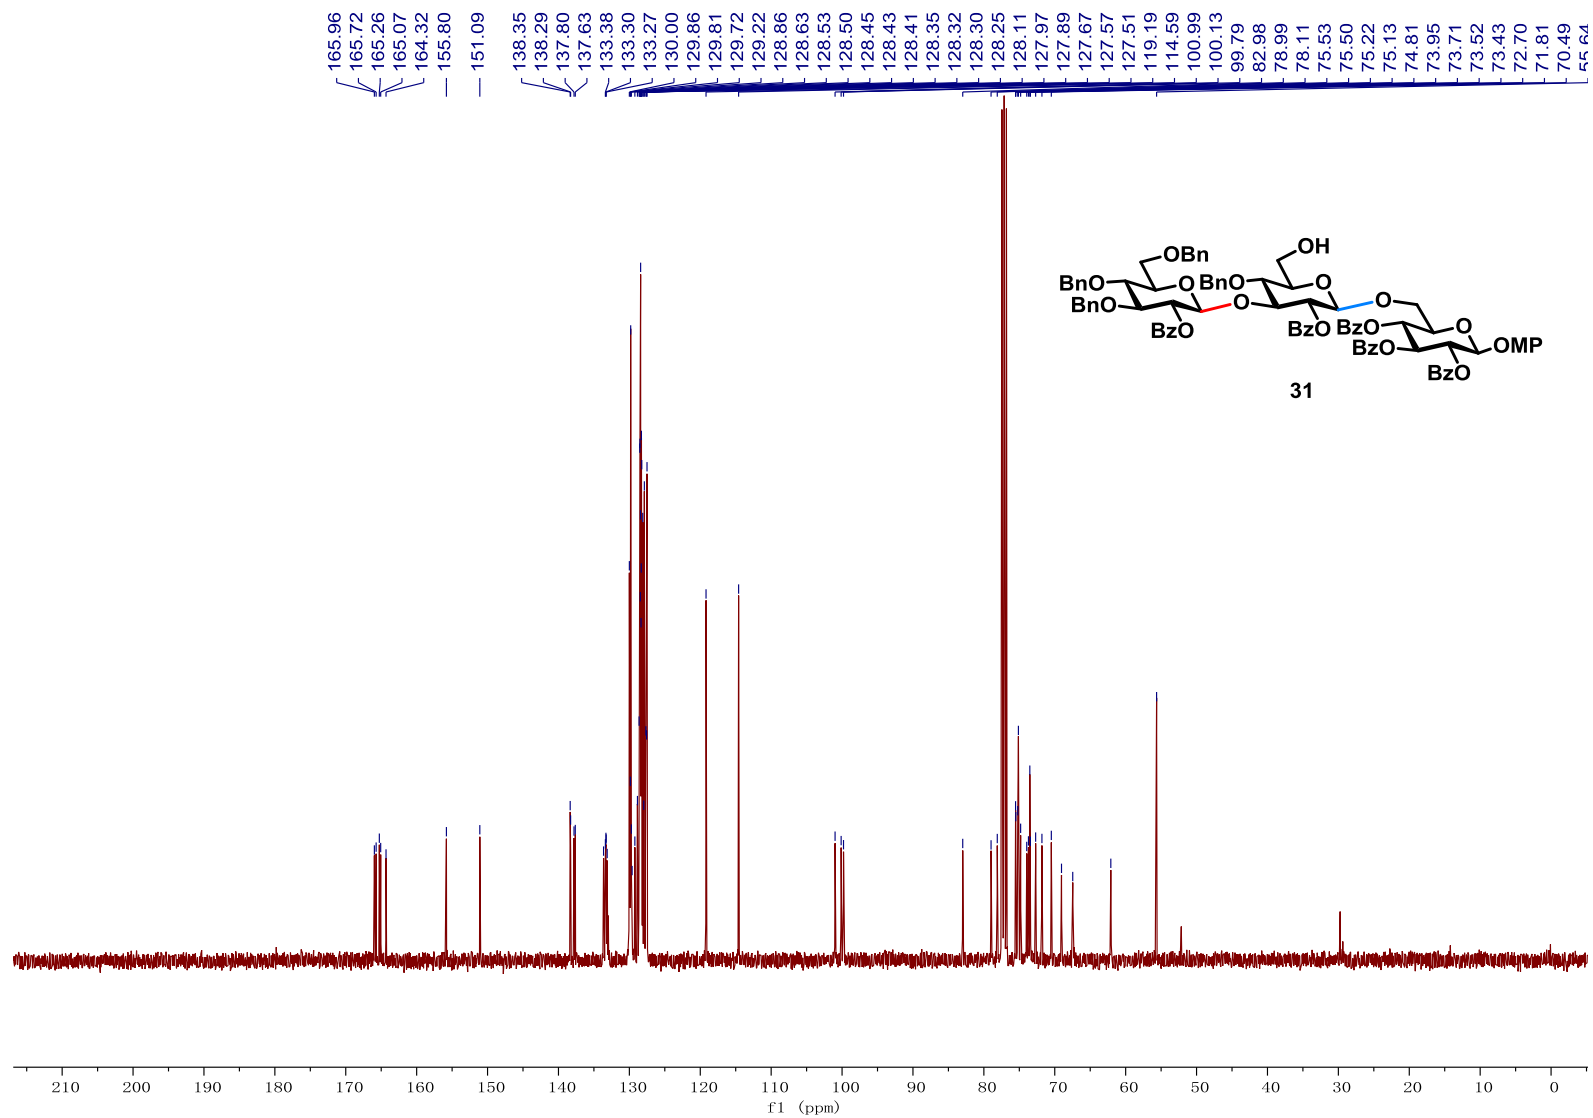

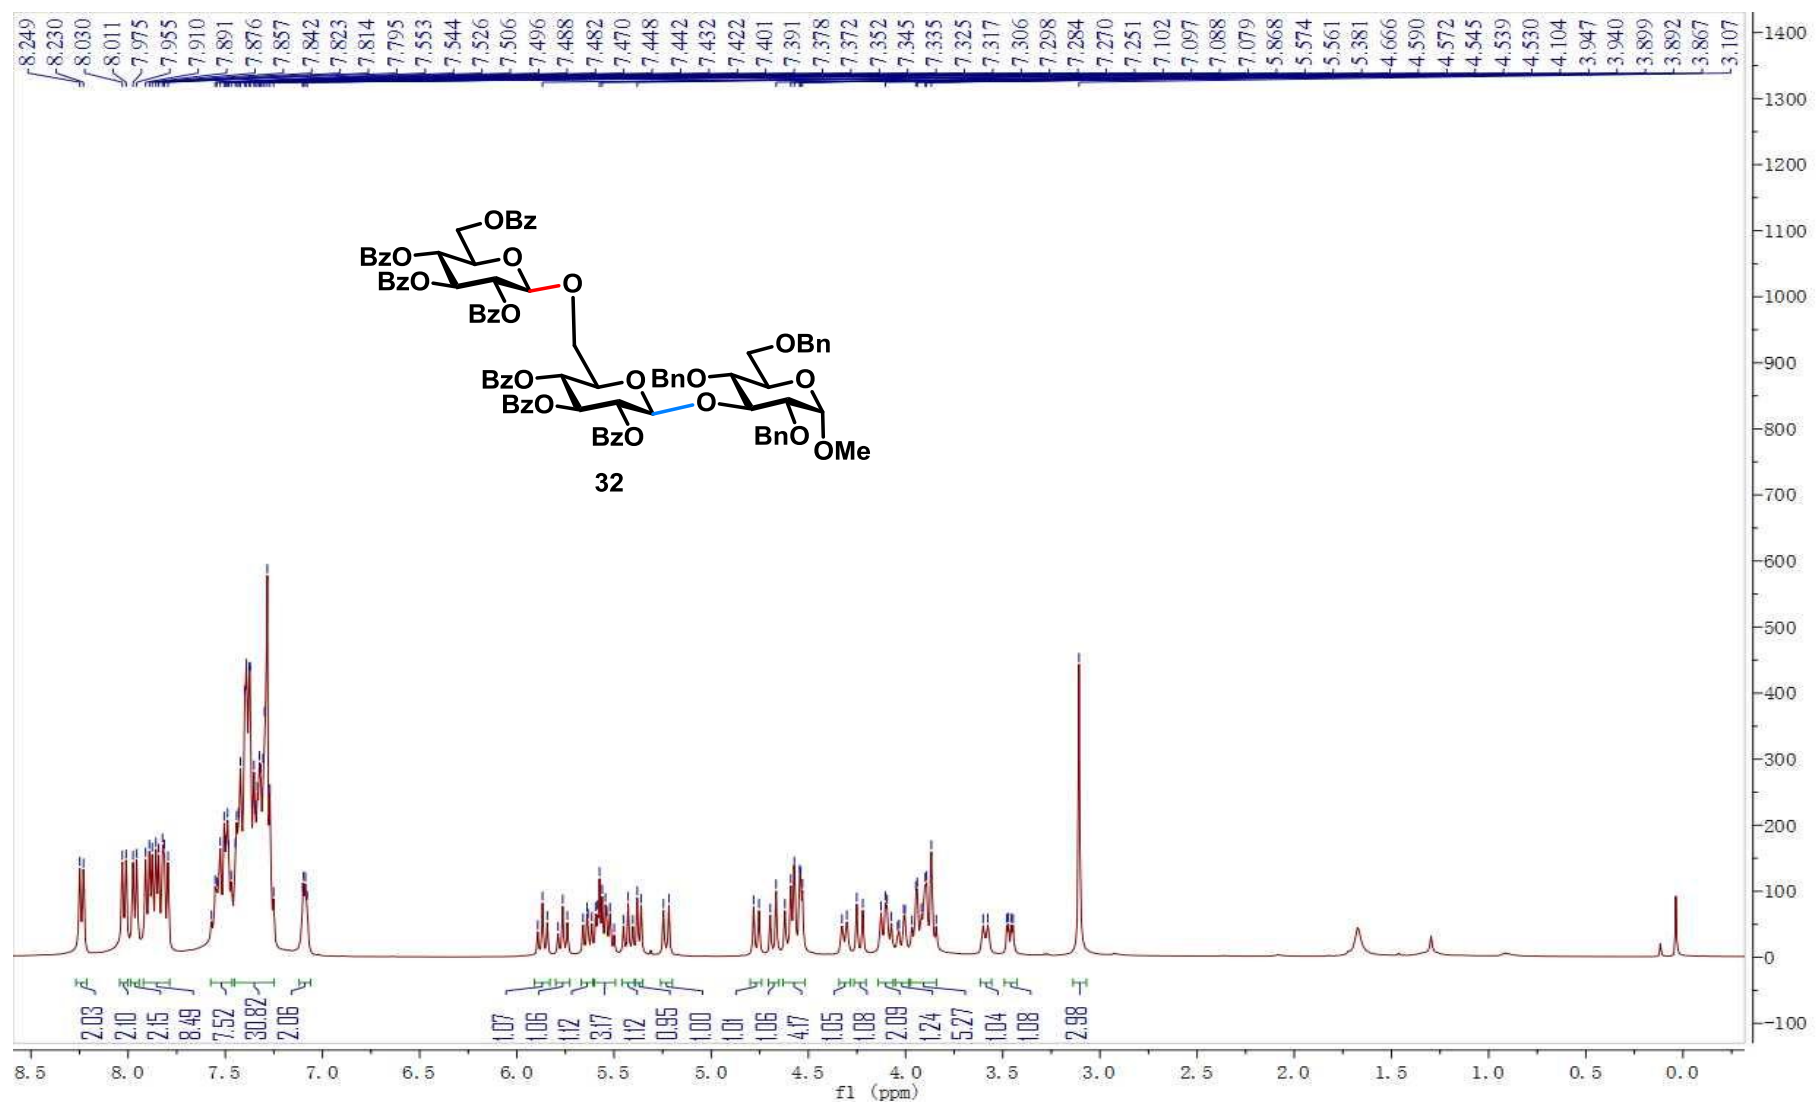

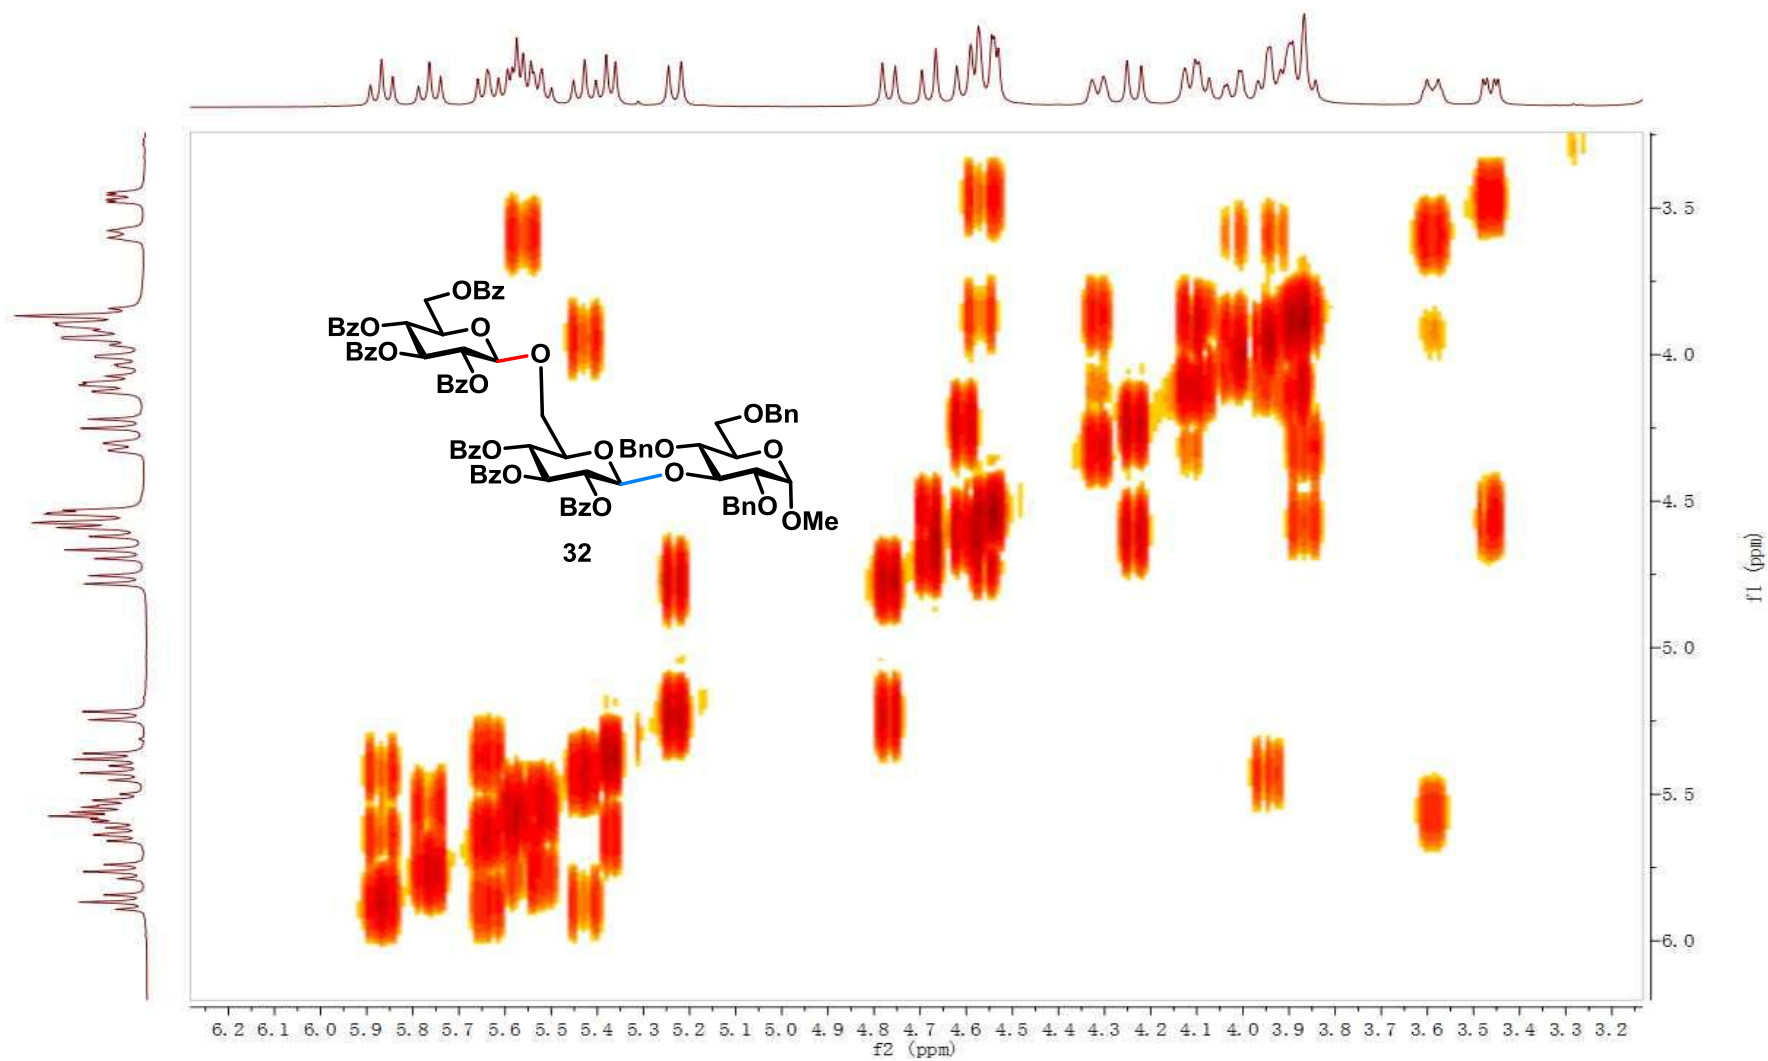

S113

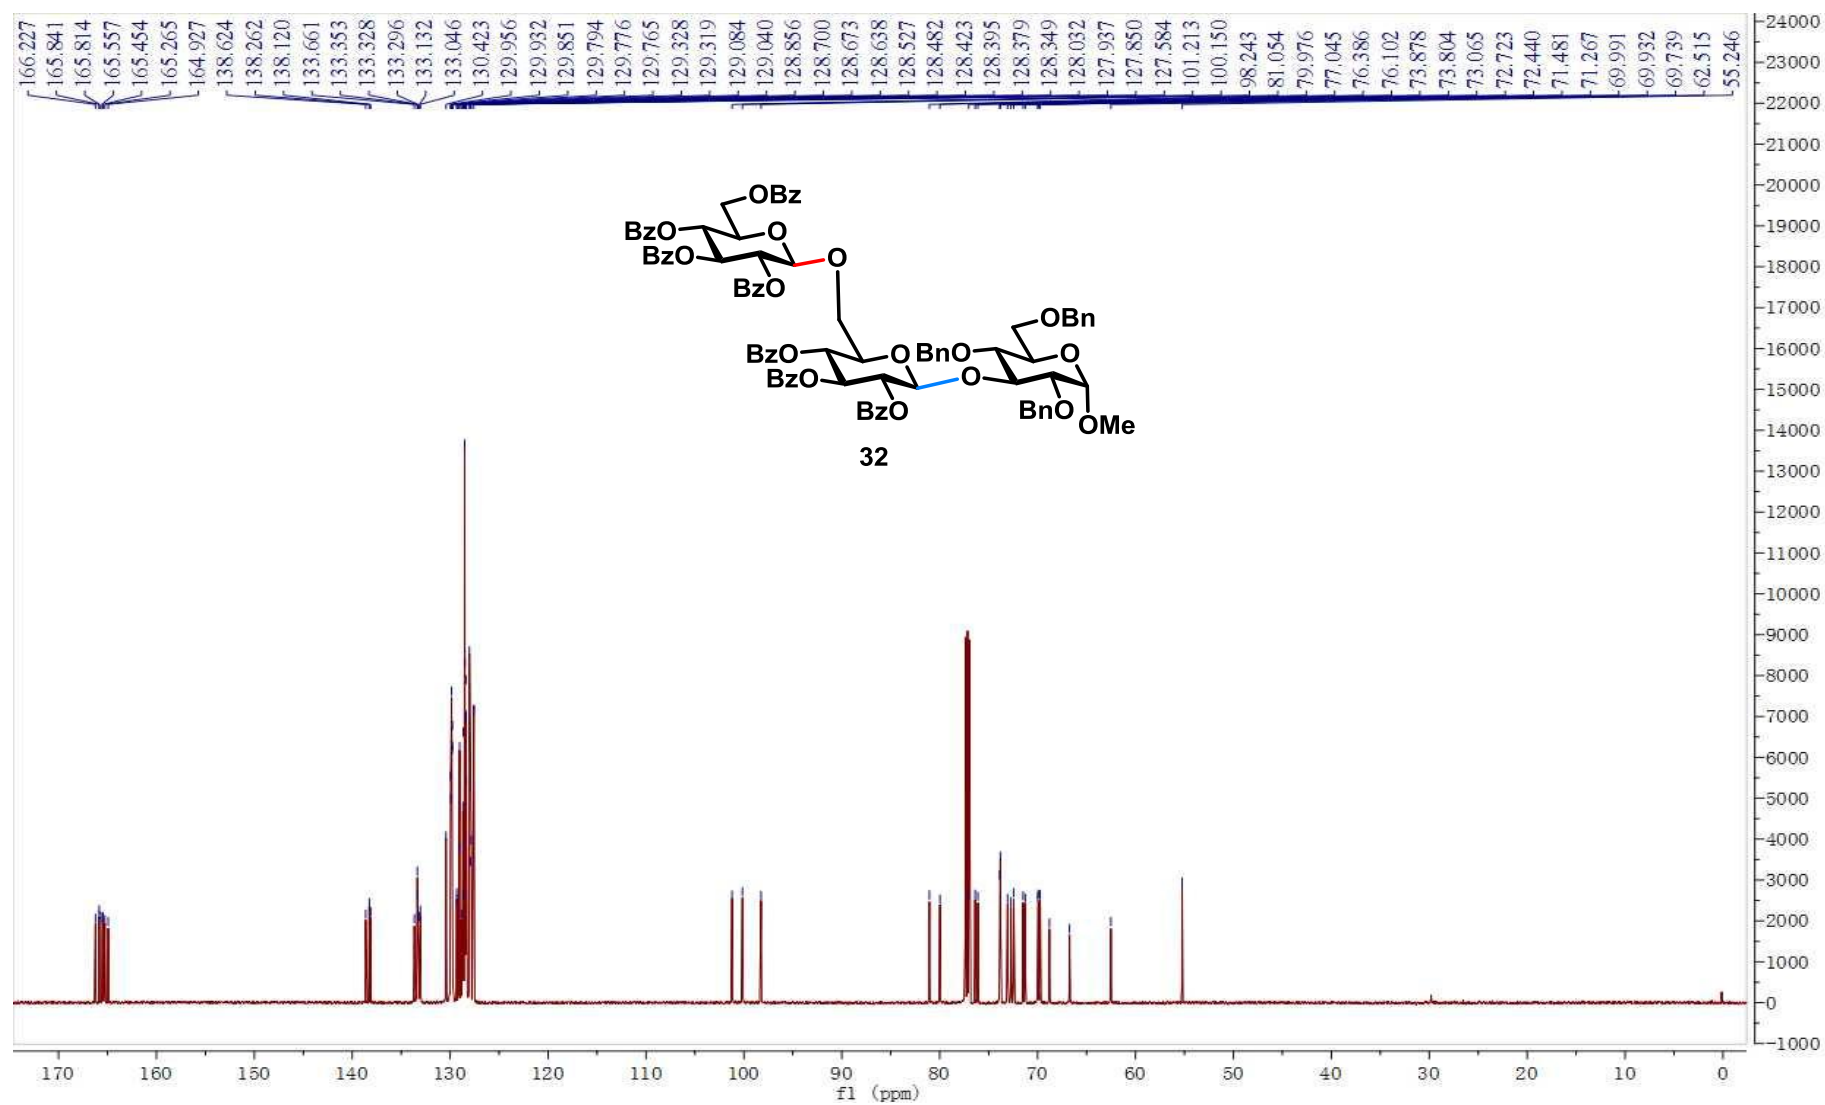

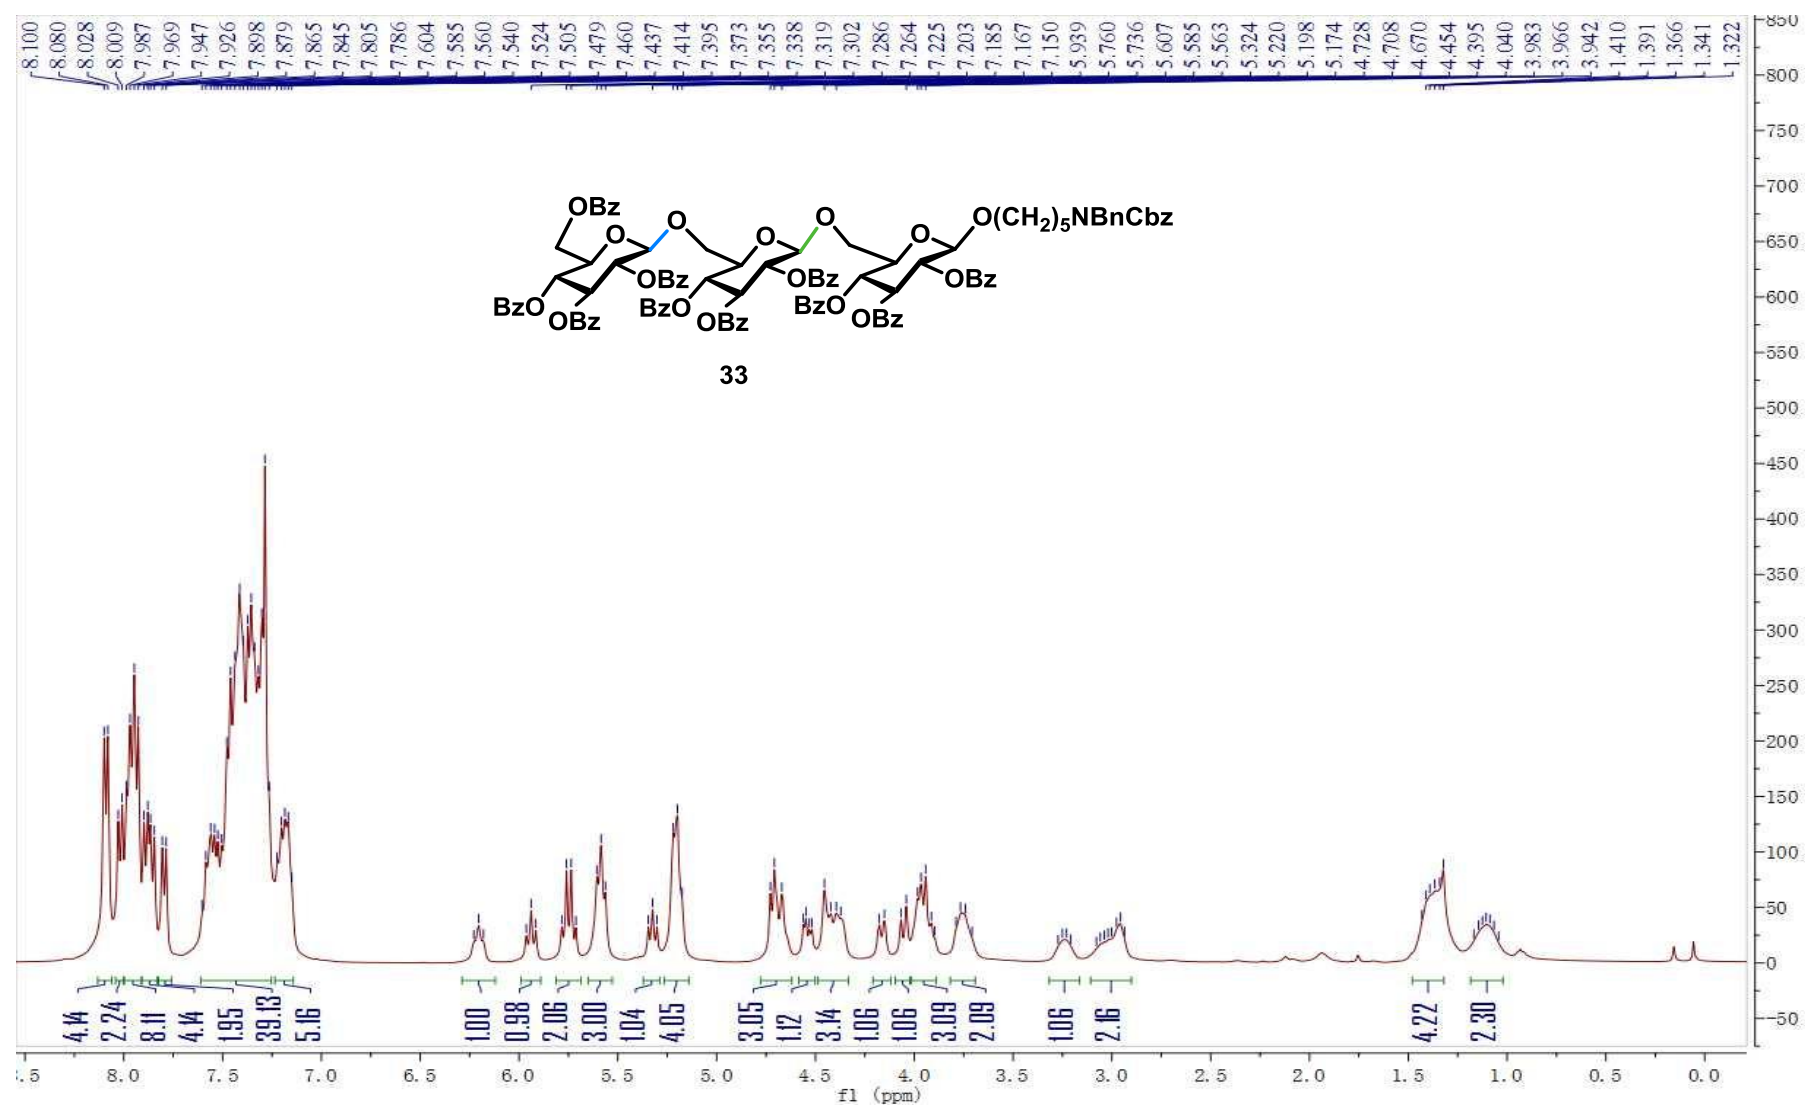

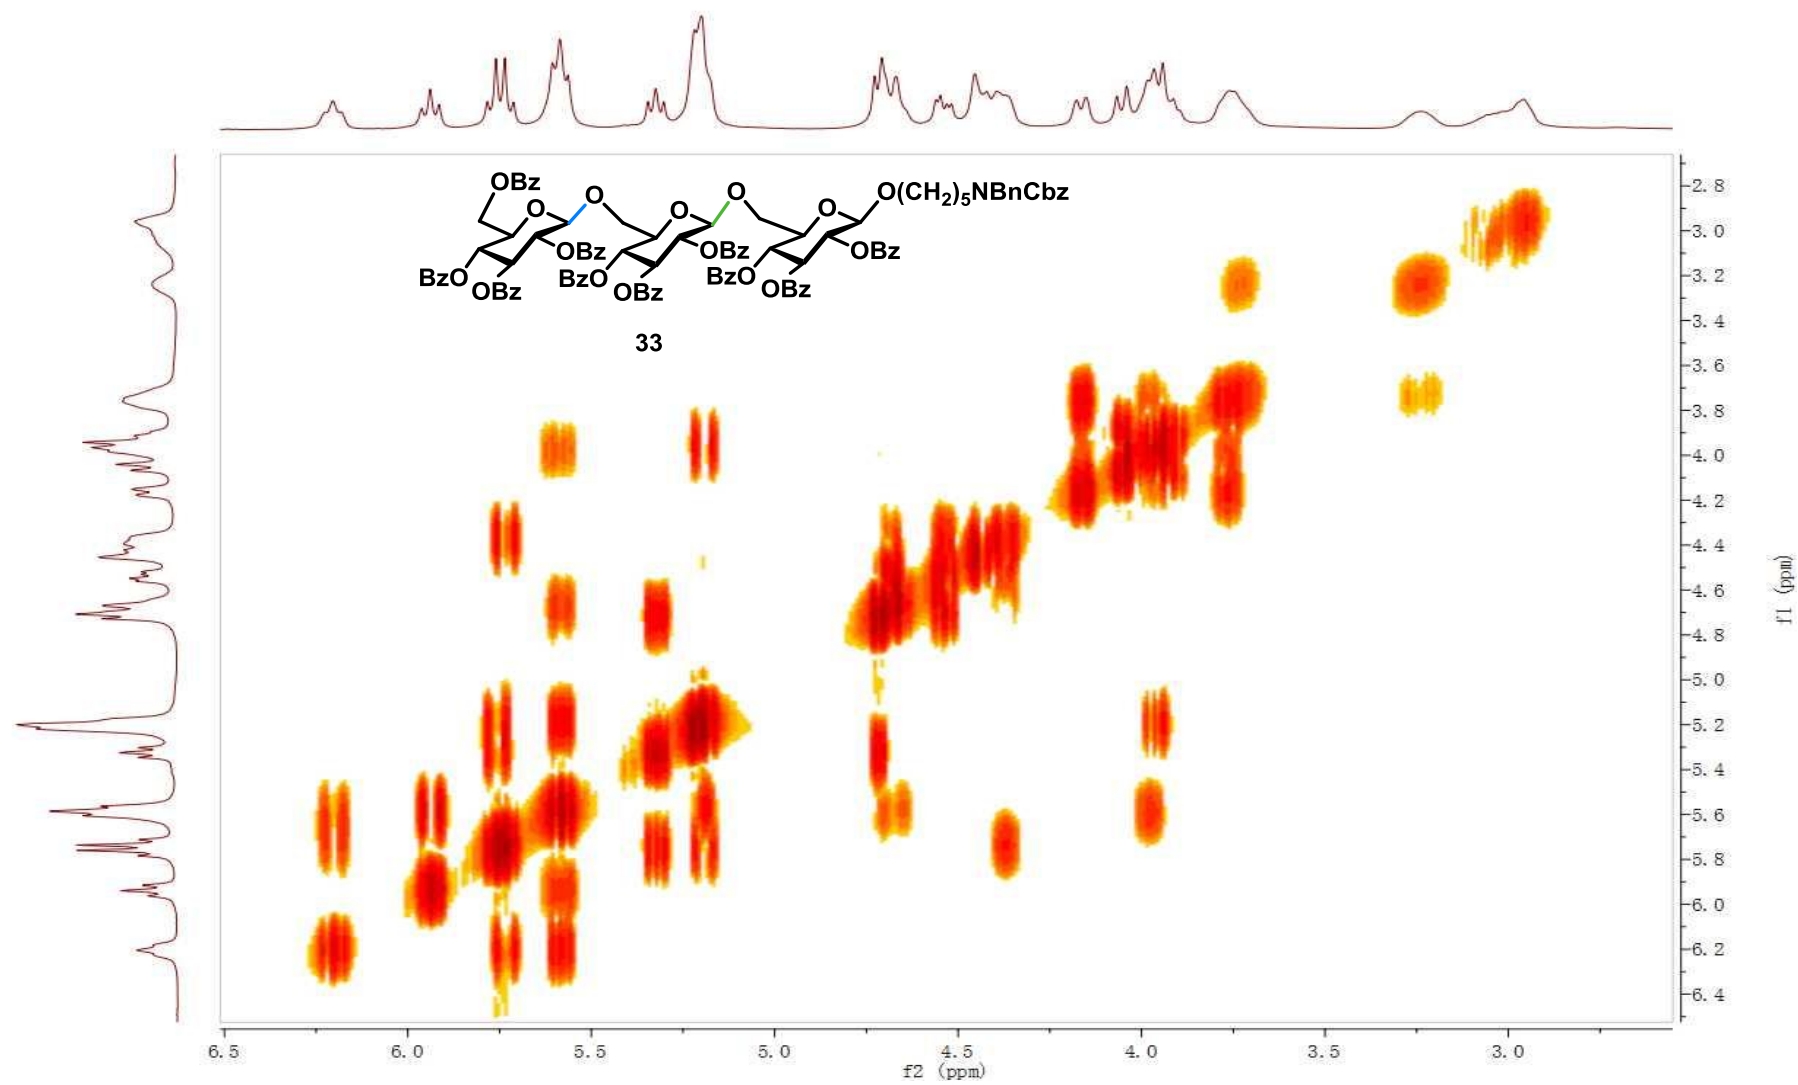



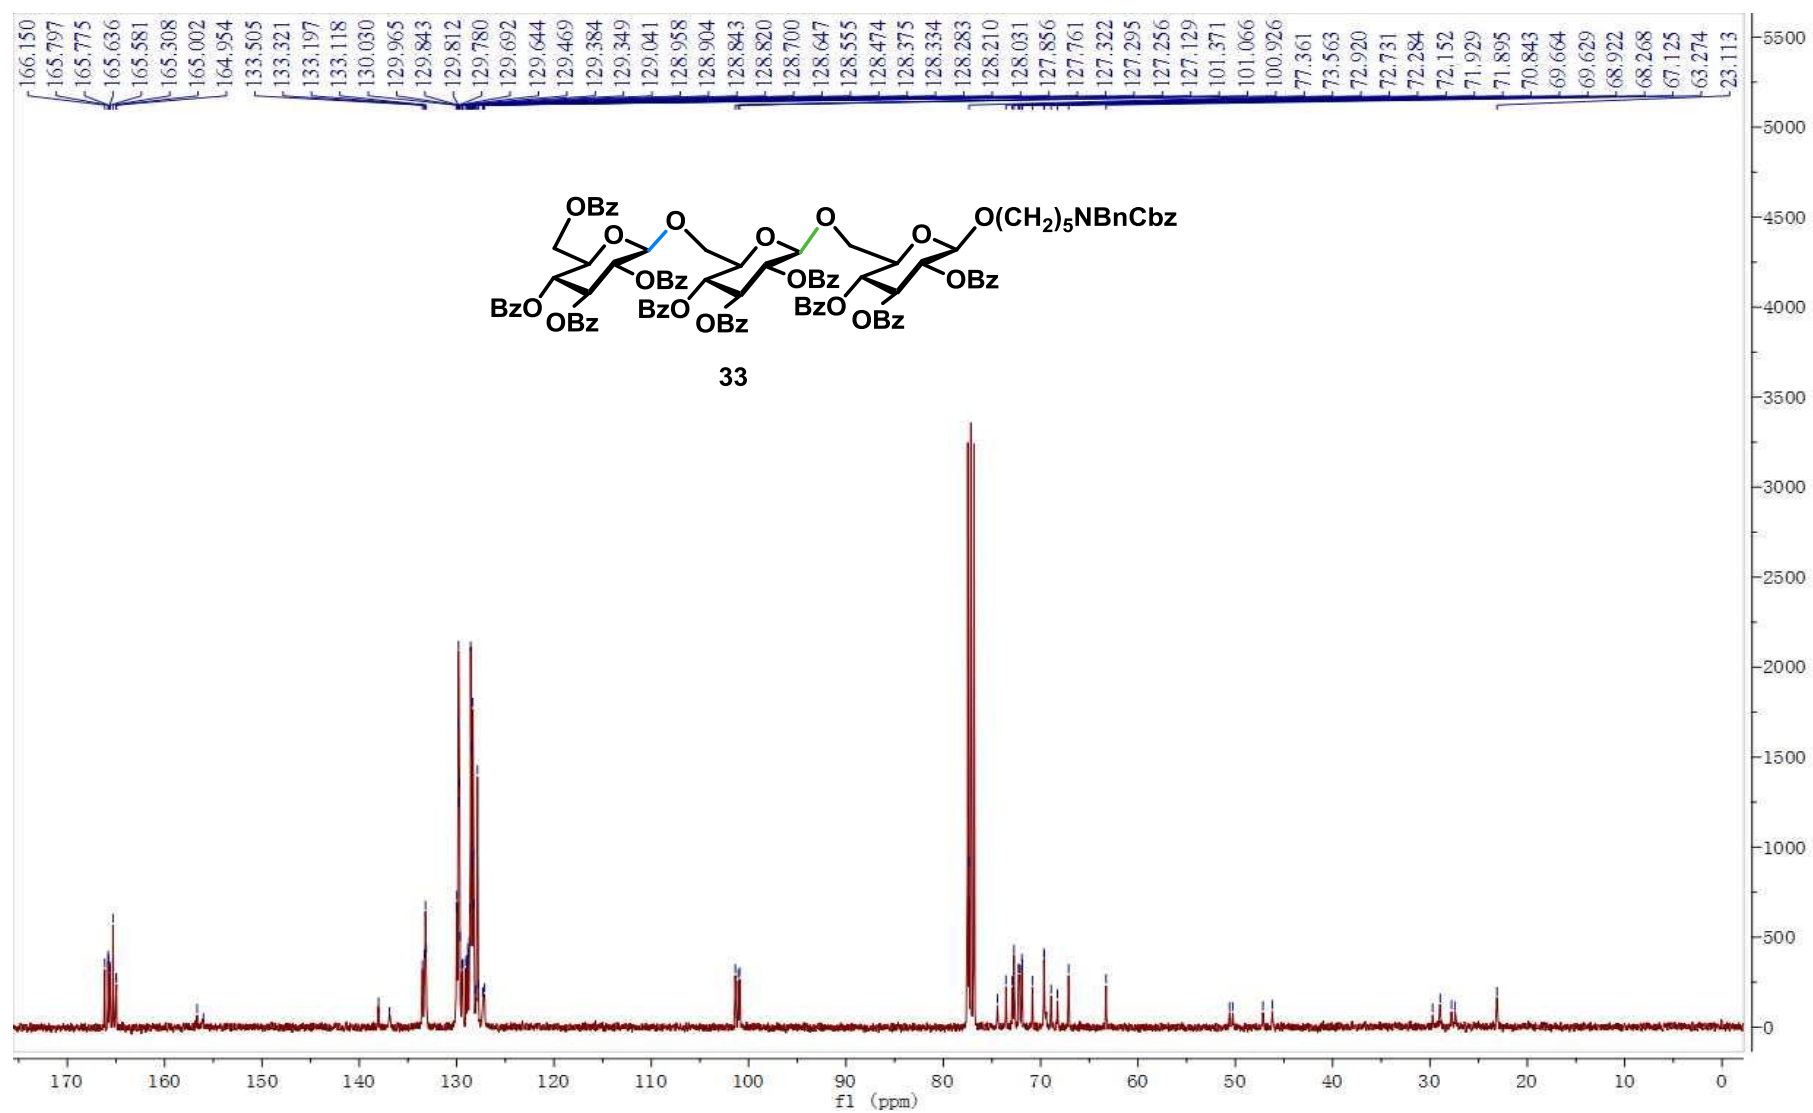

S117

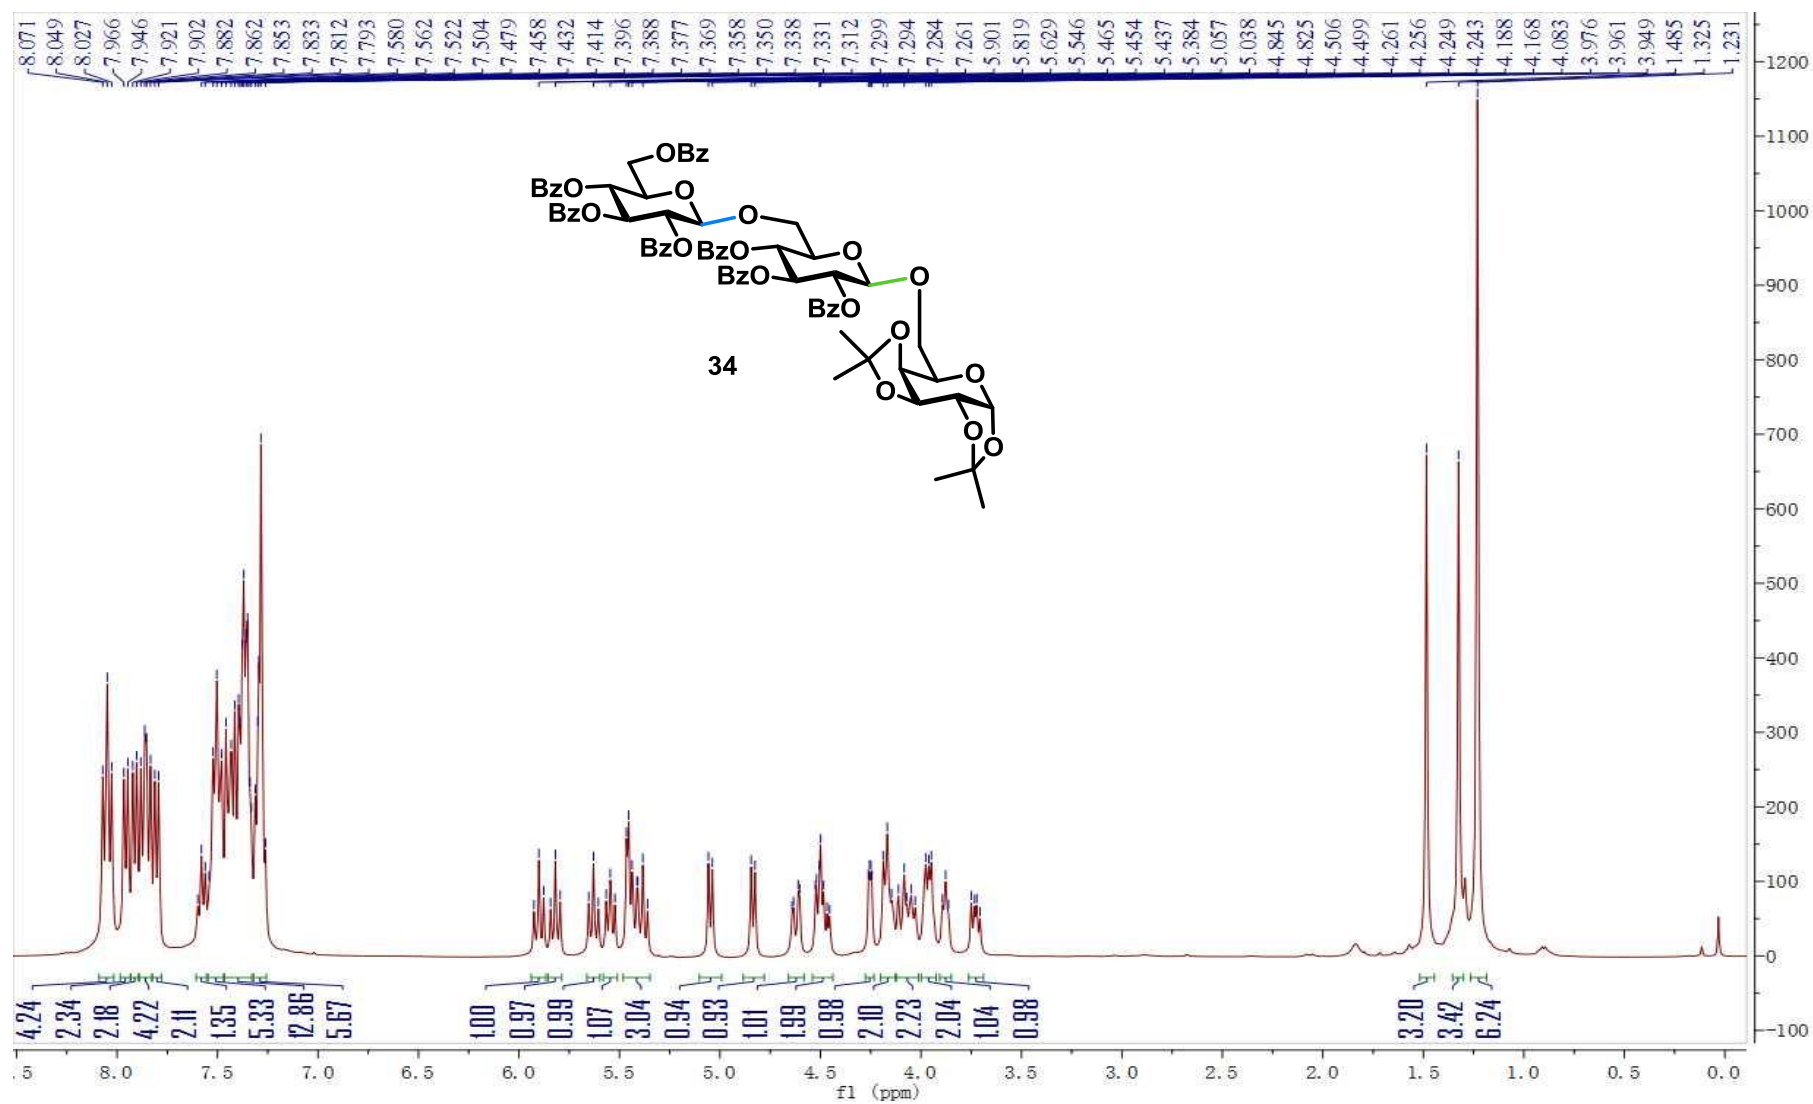

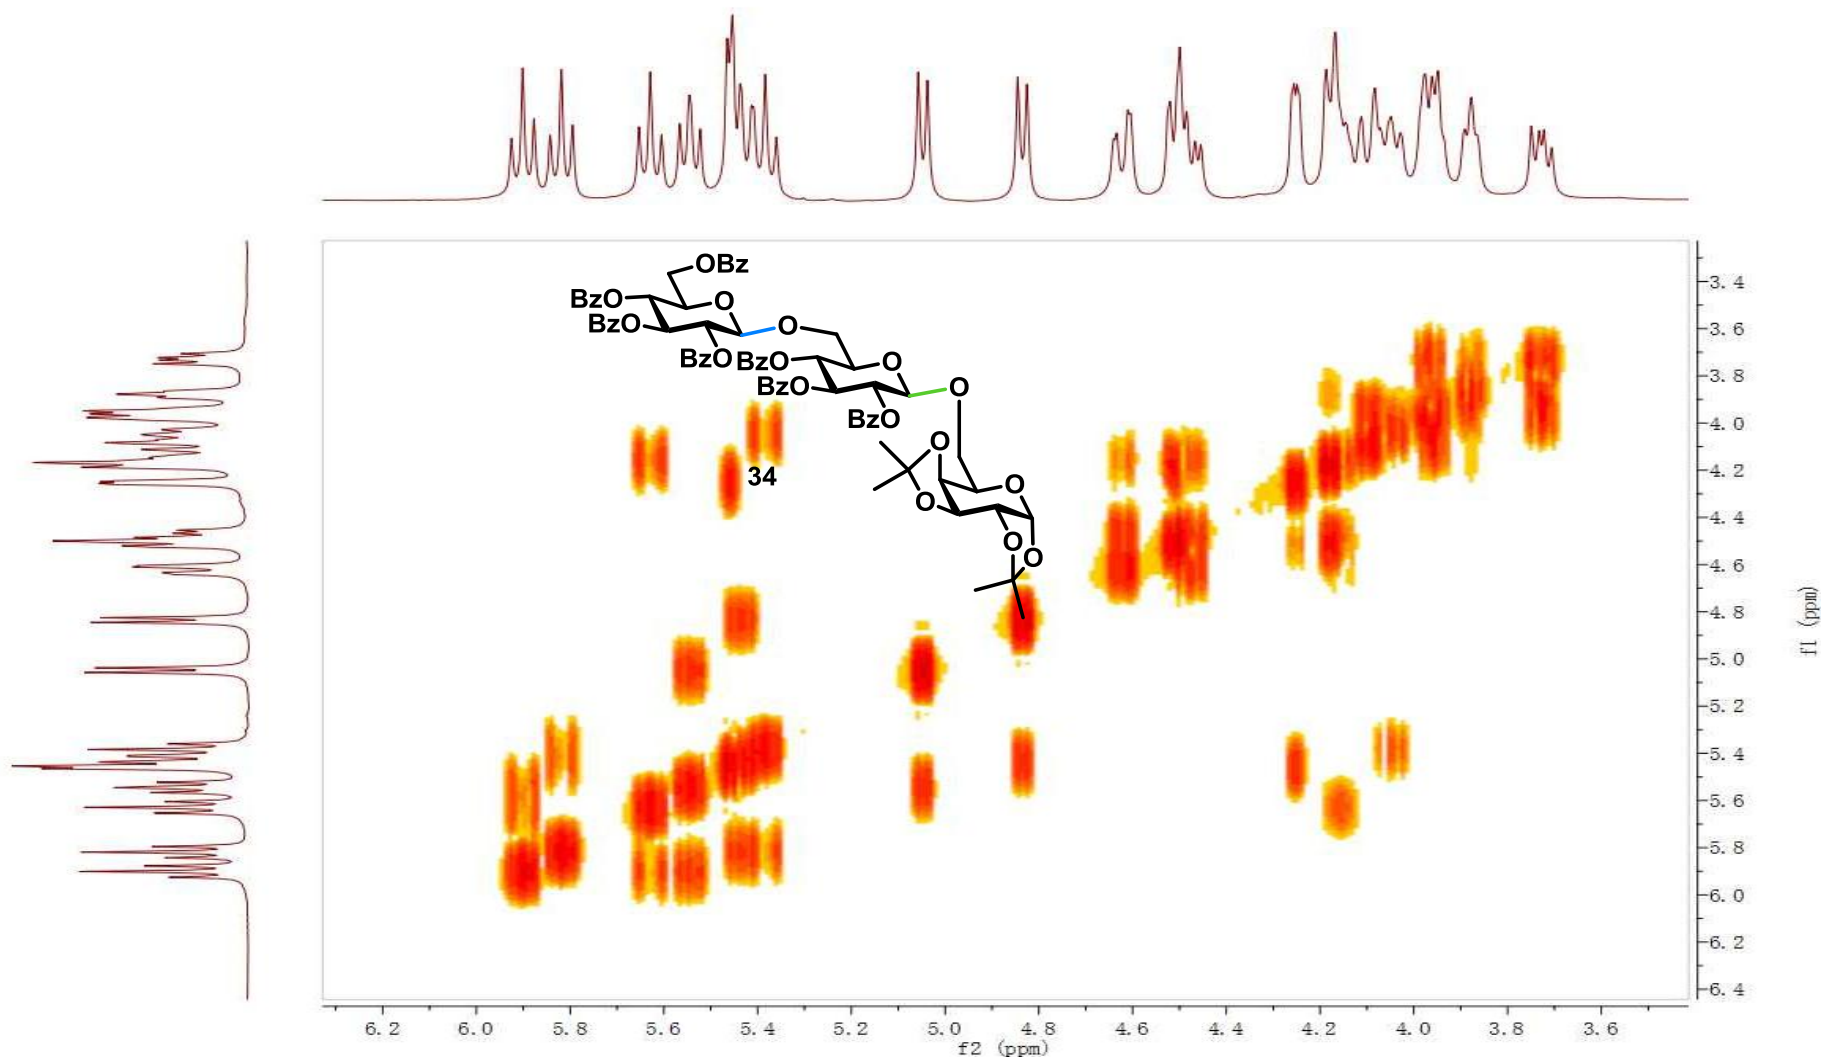

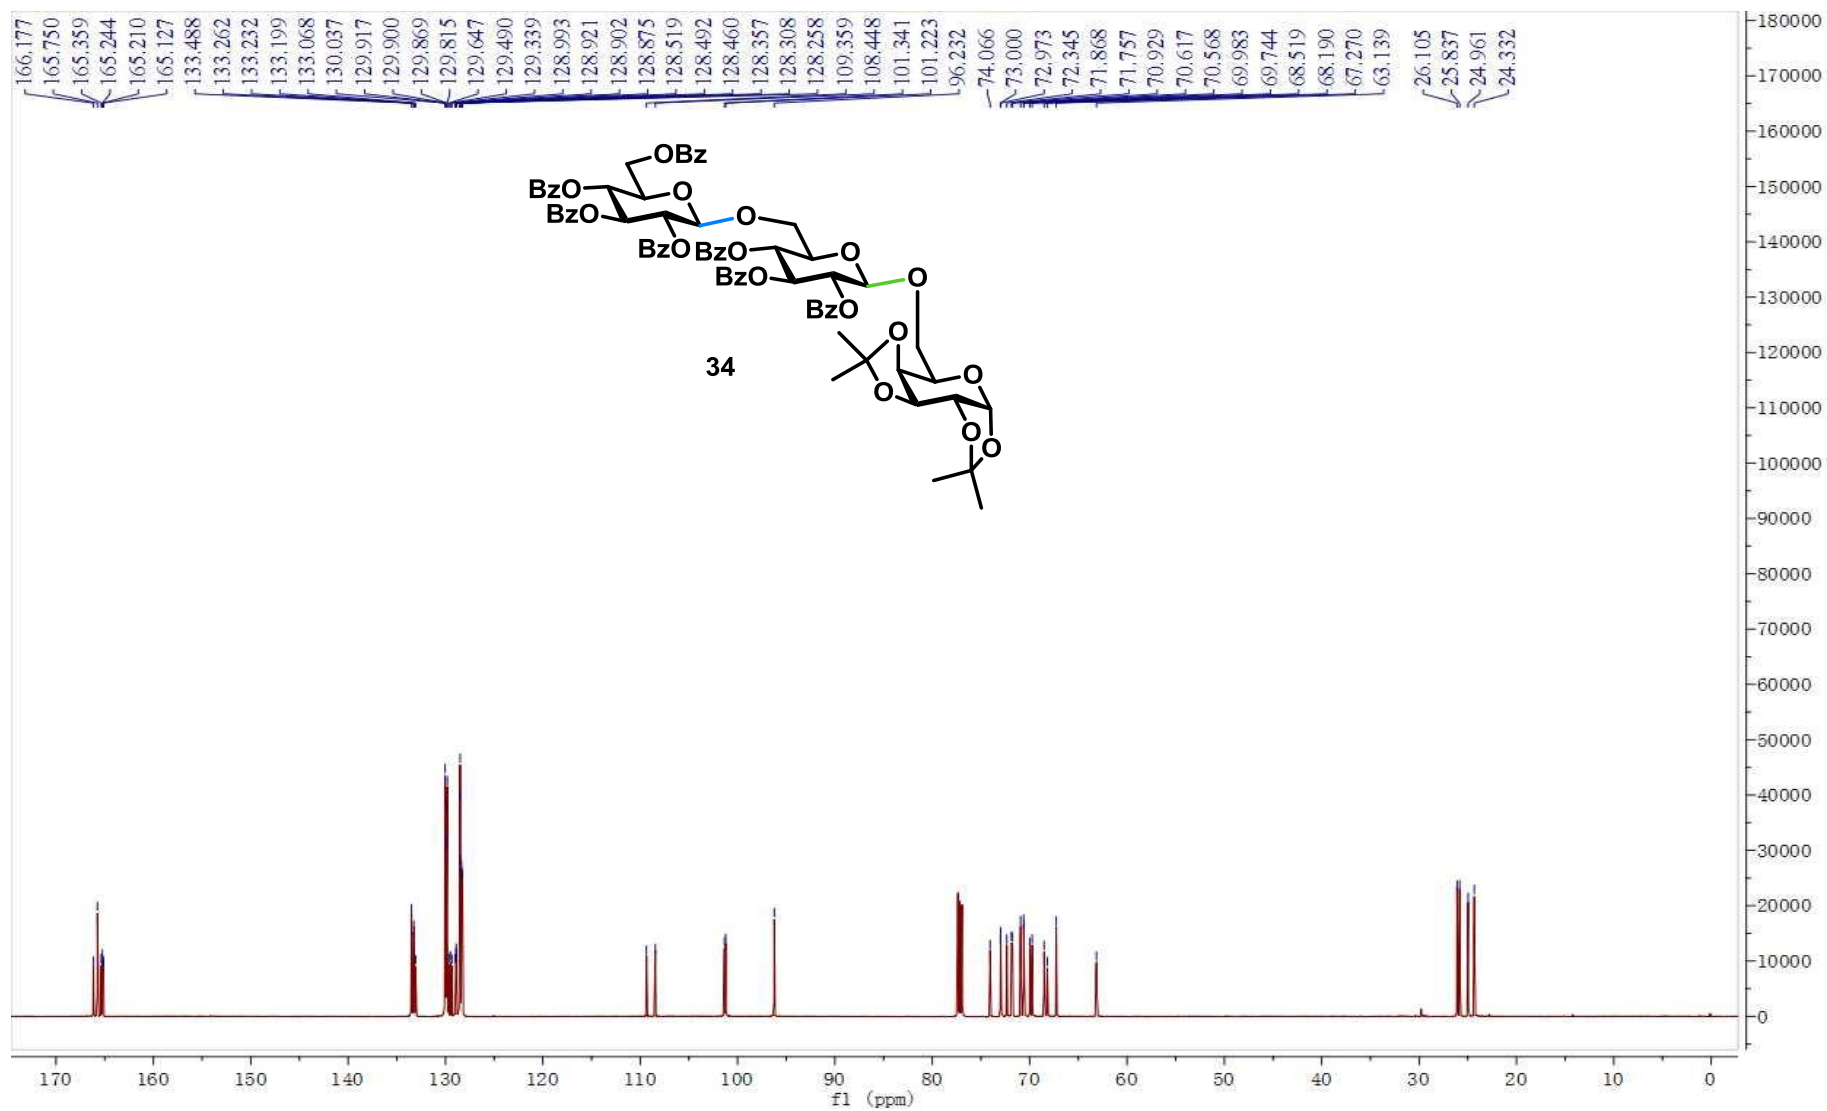



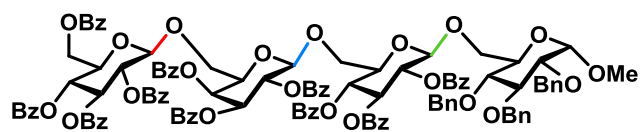

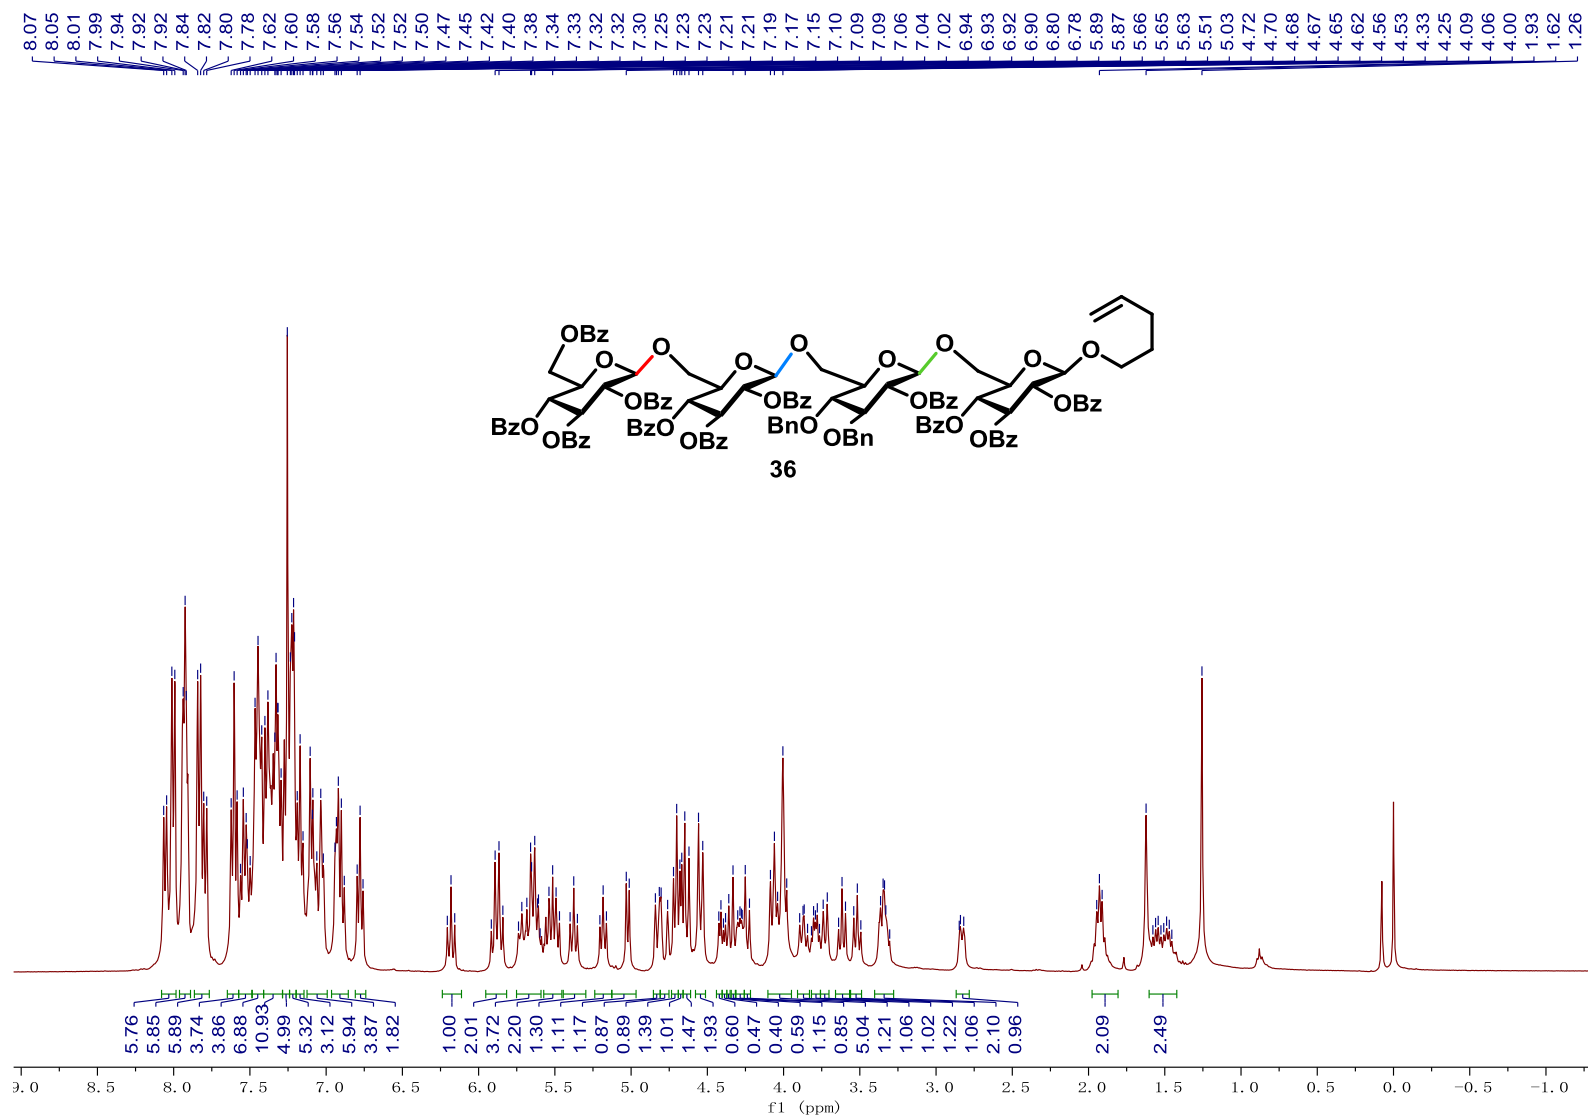

S123











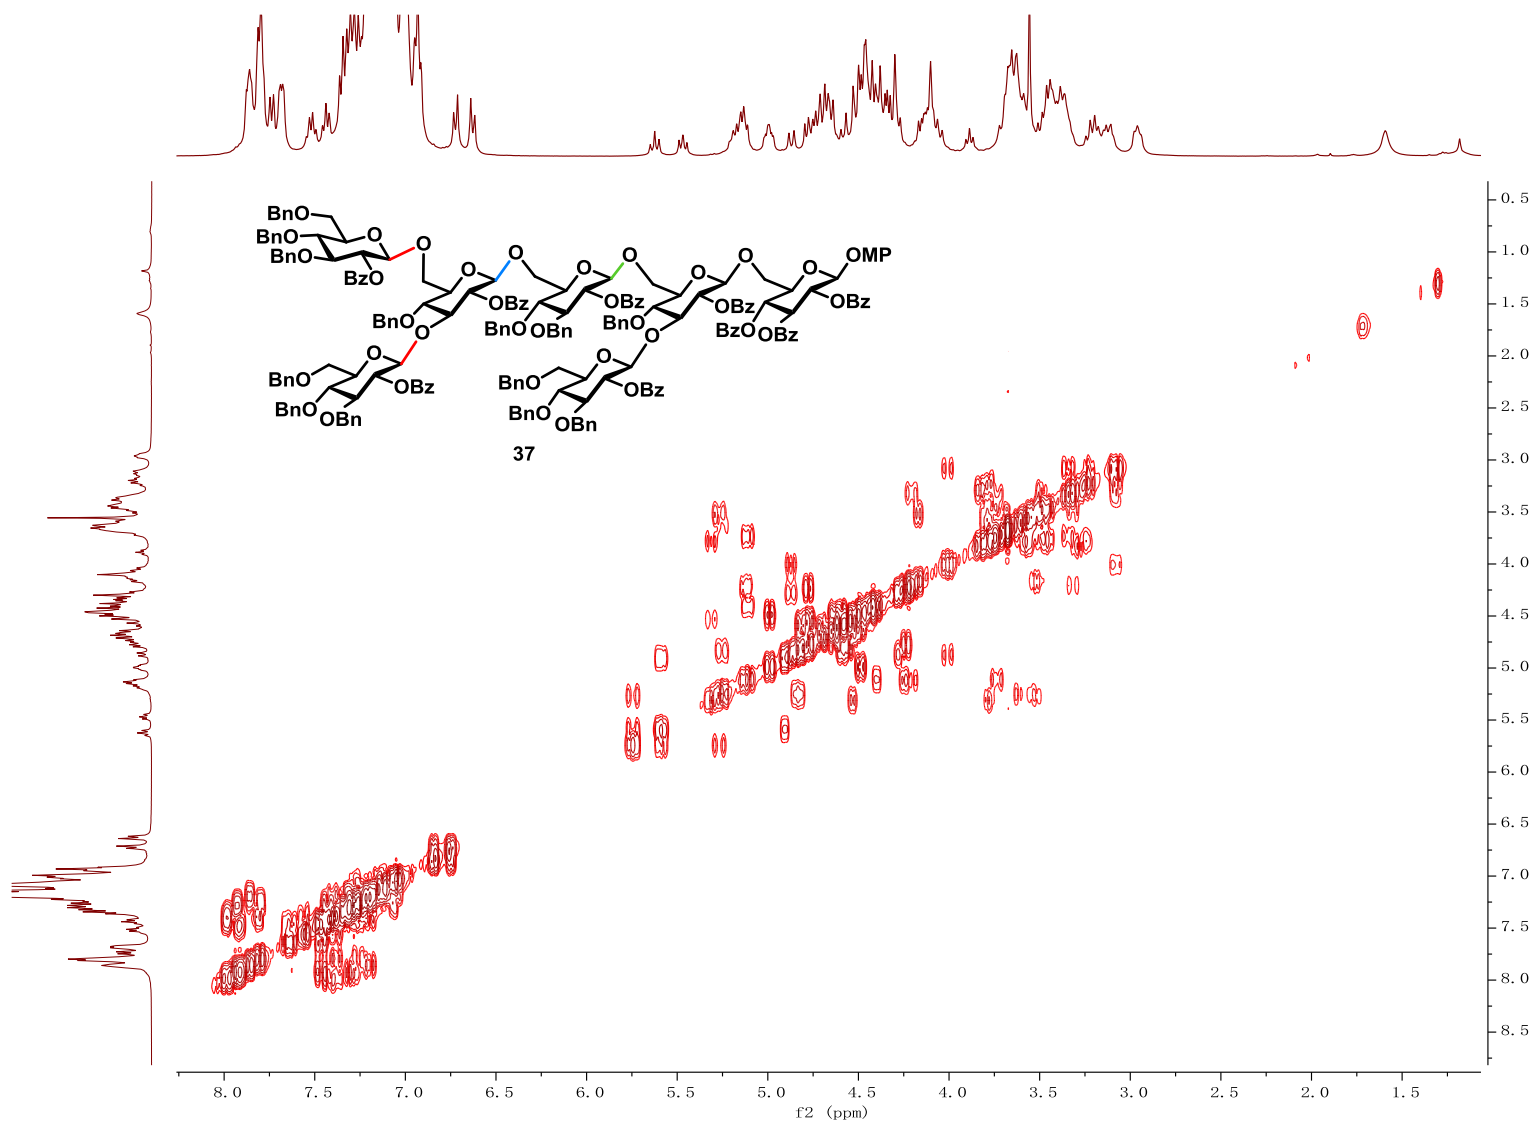

S127

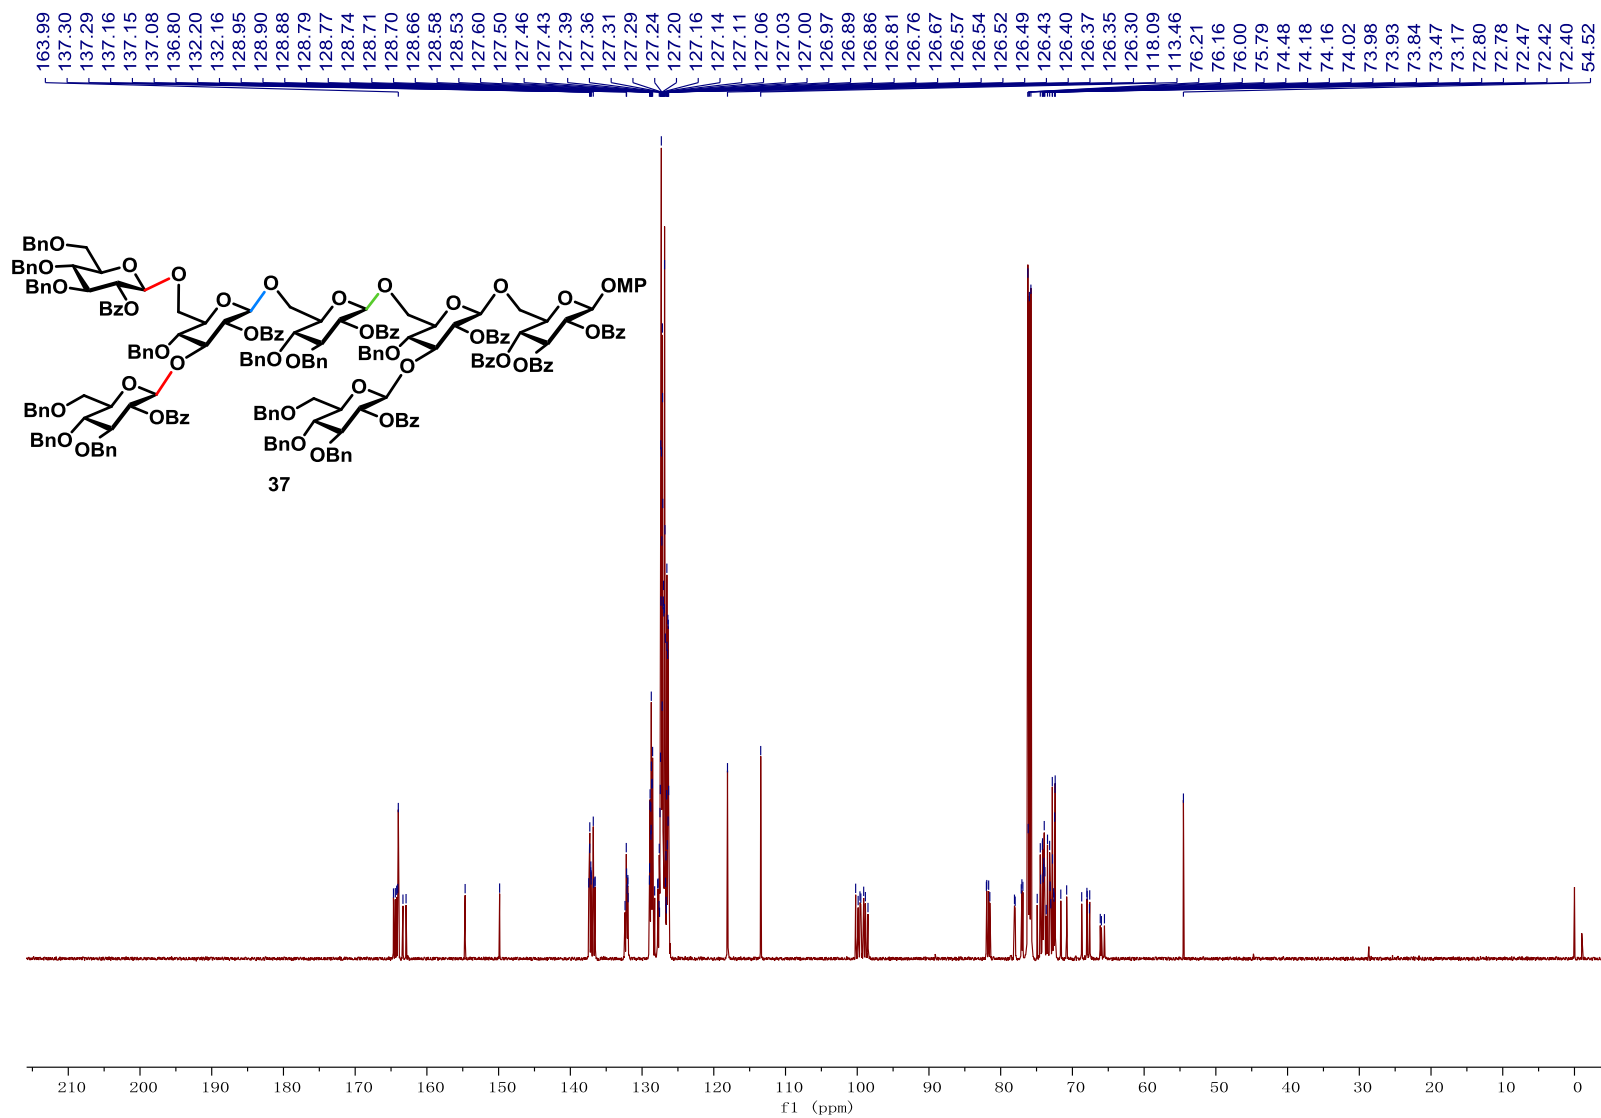

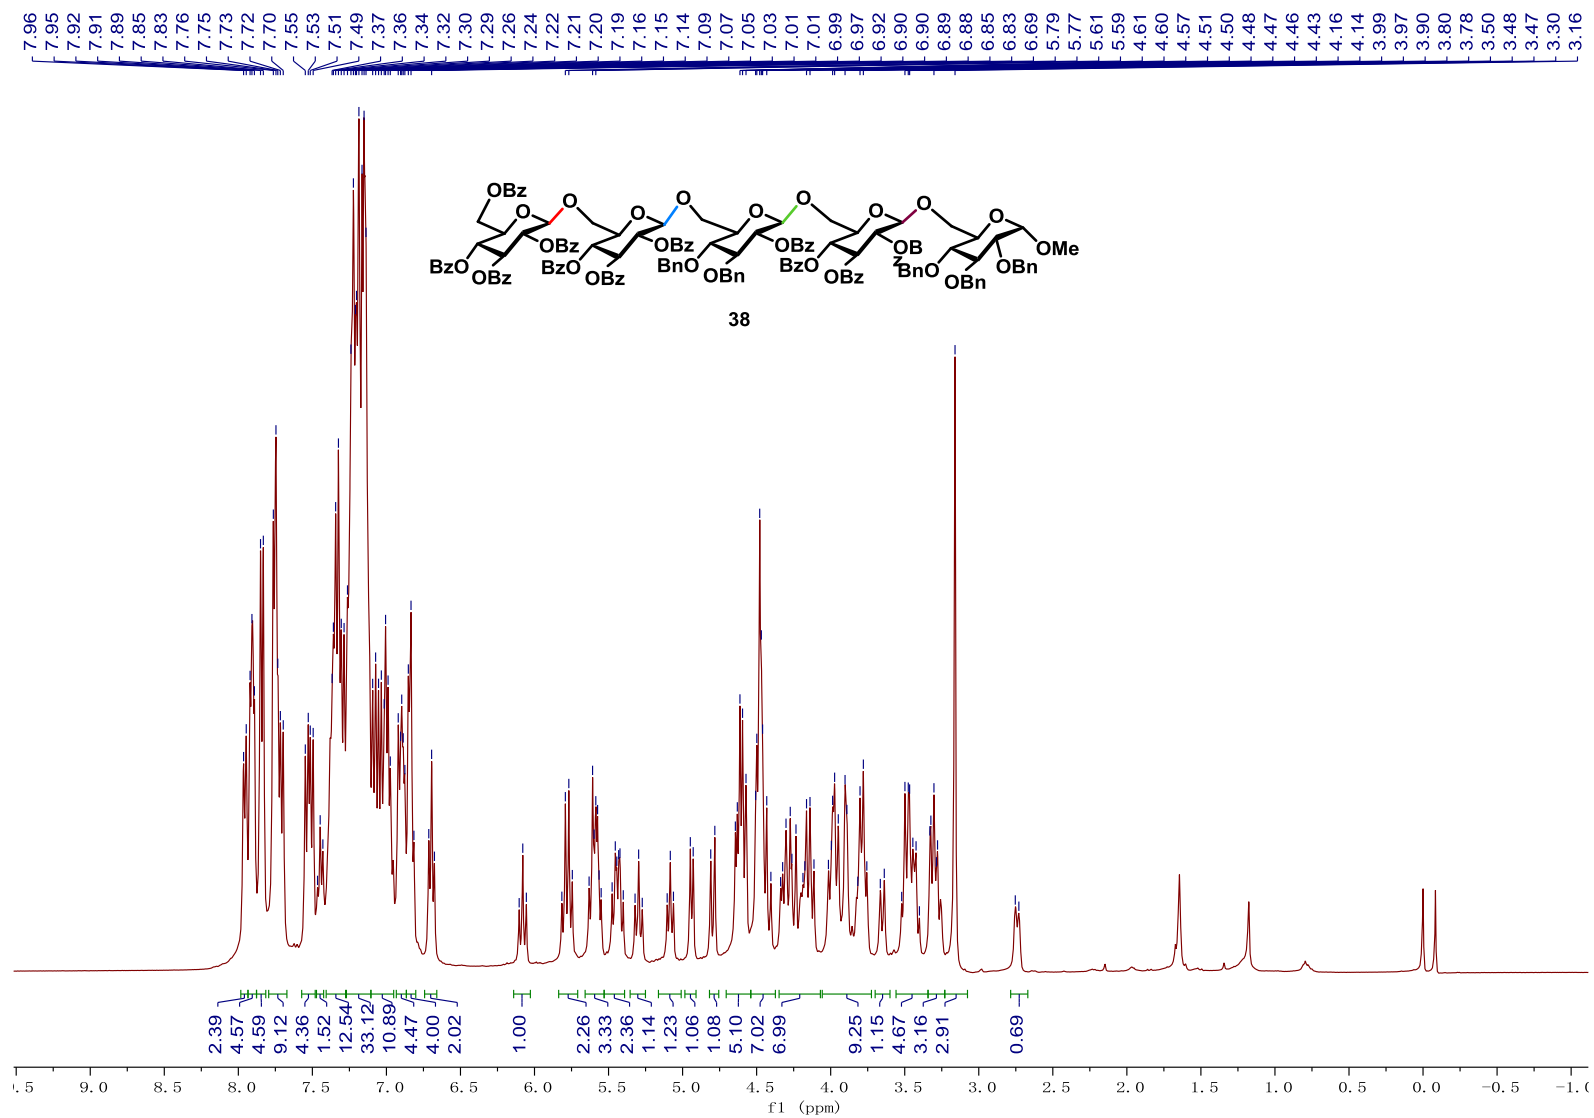

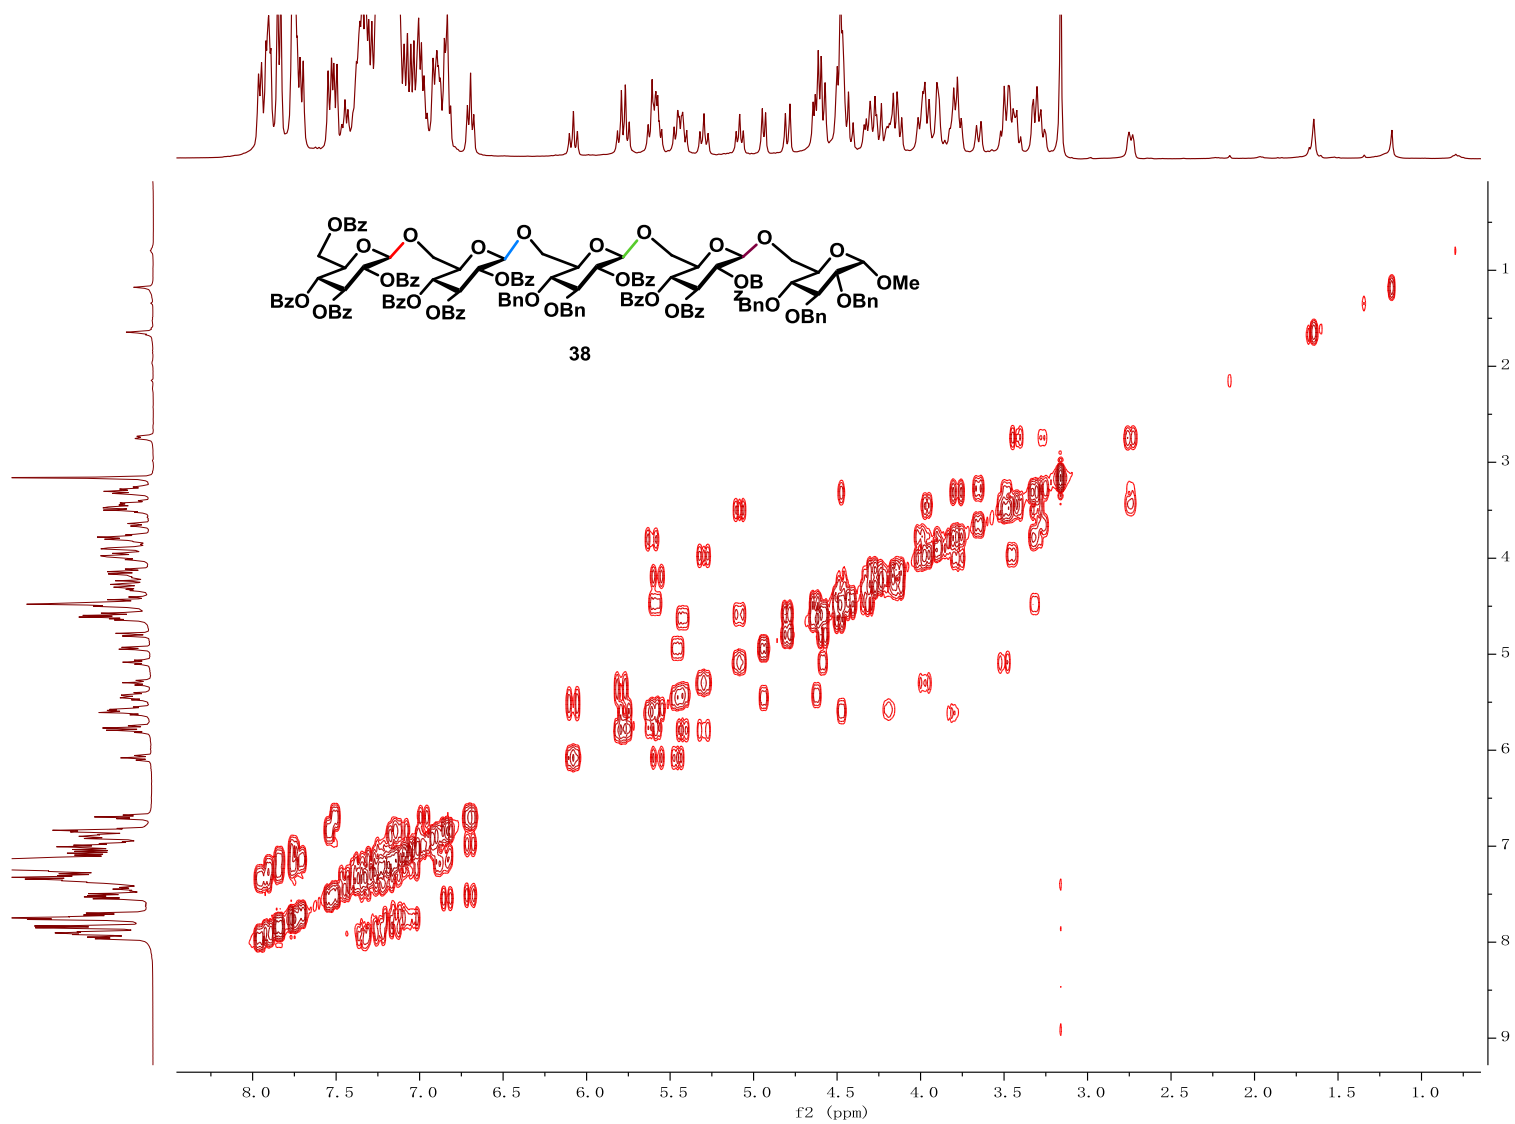

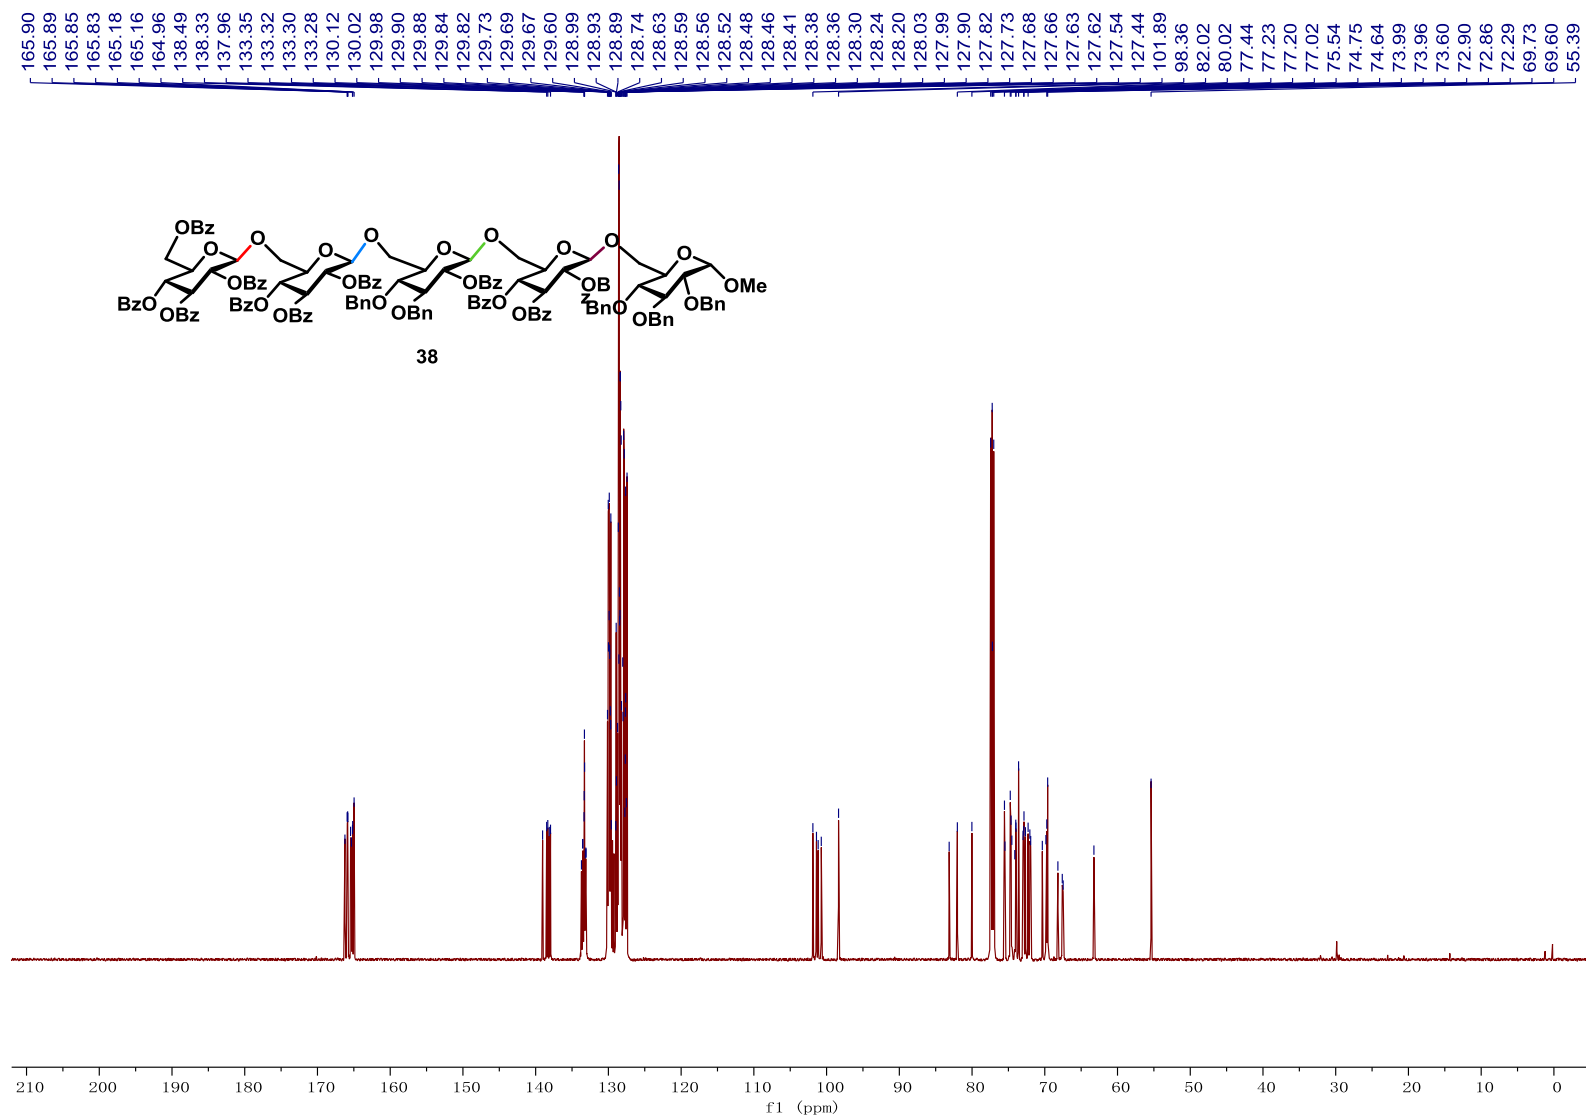

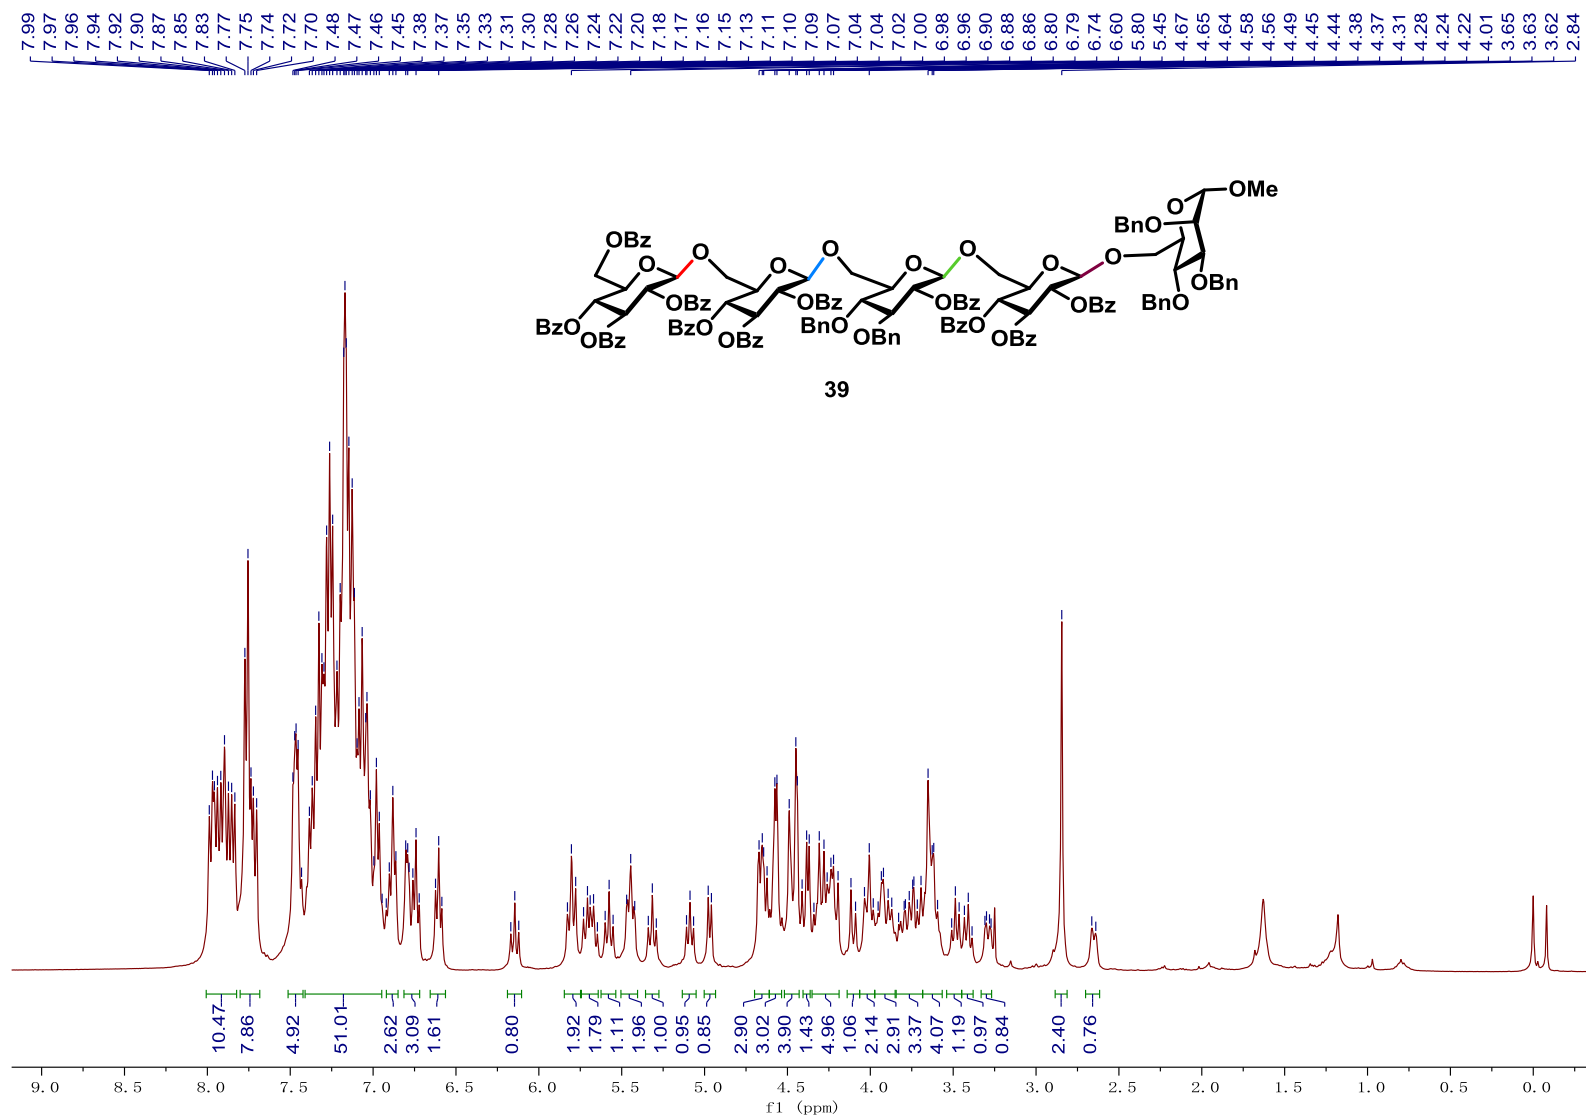



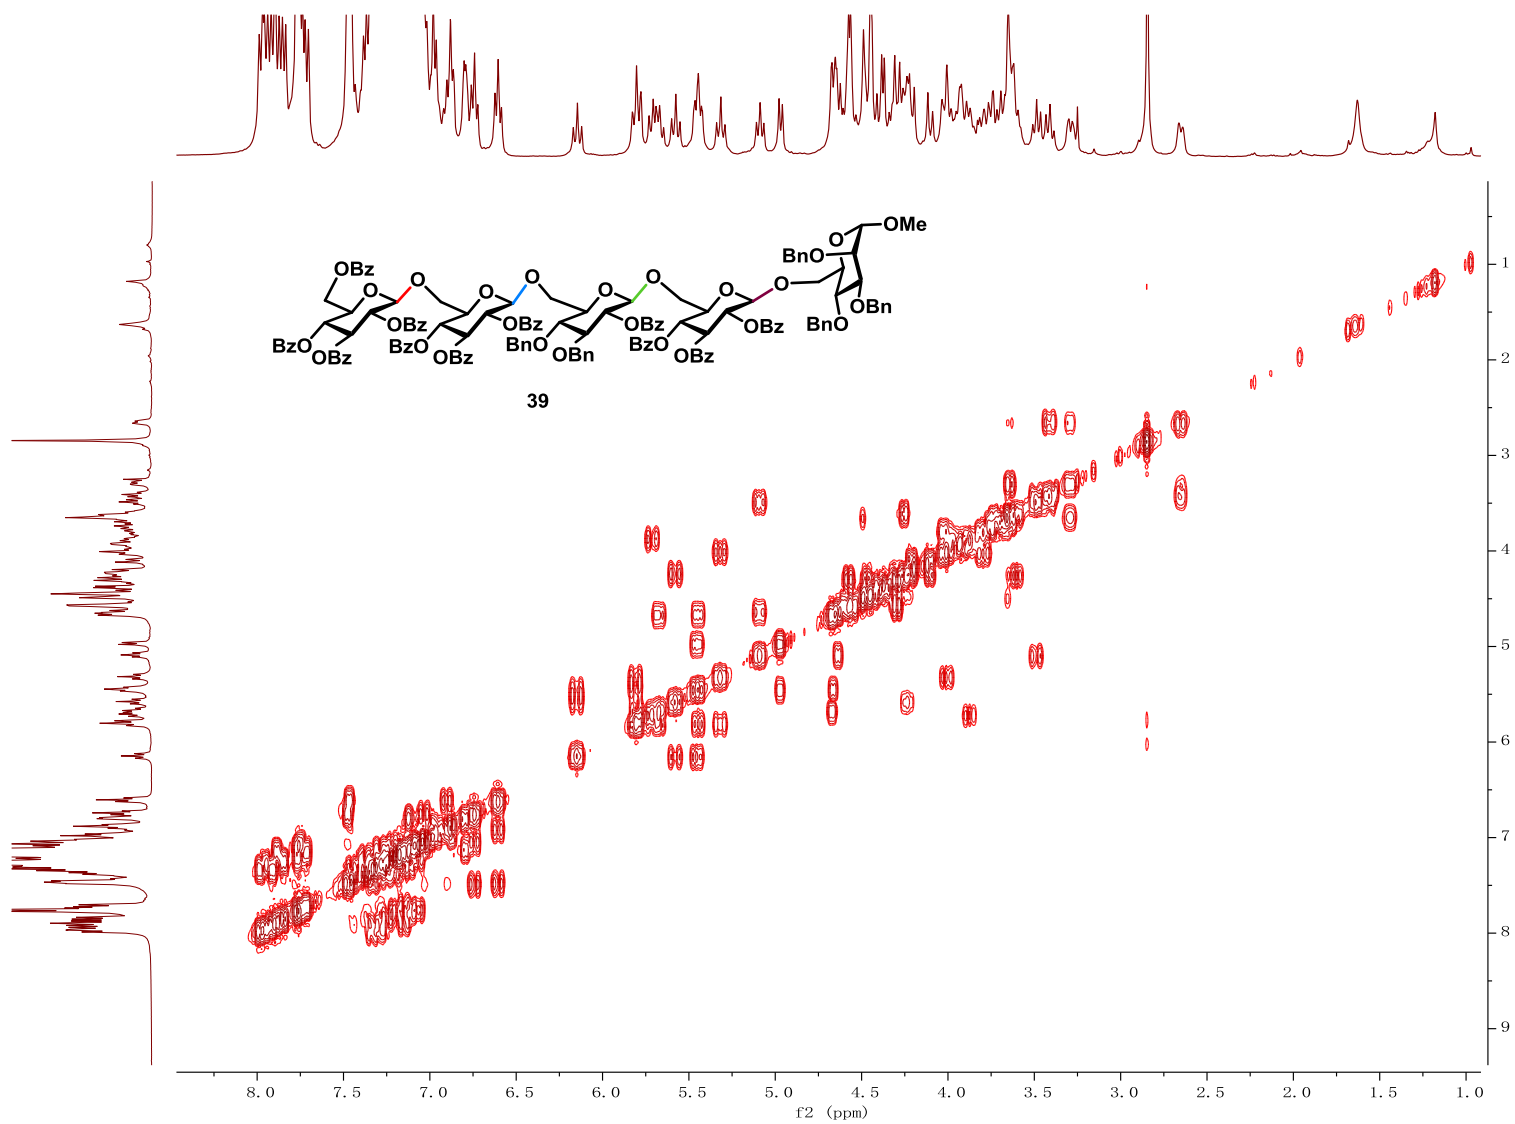

S133

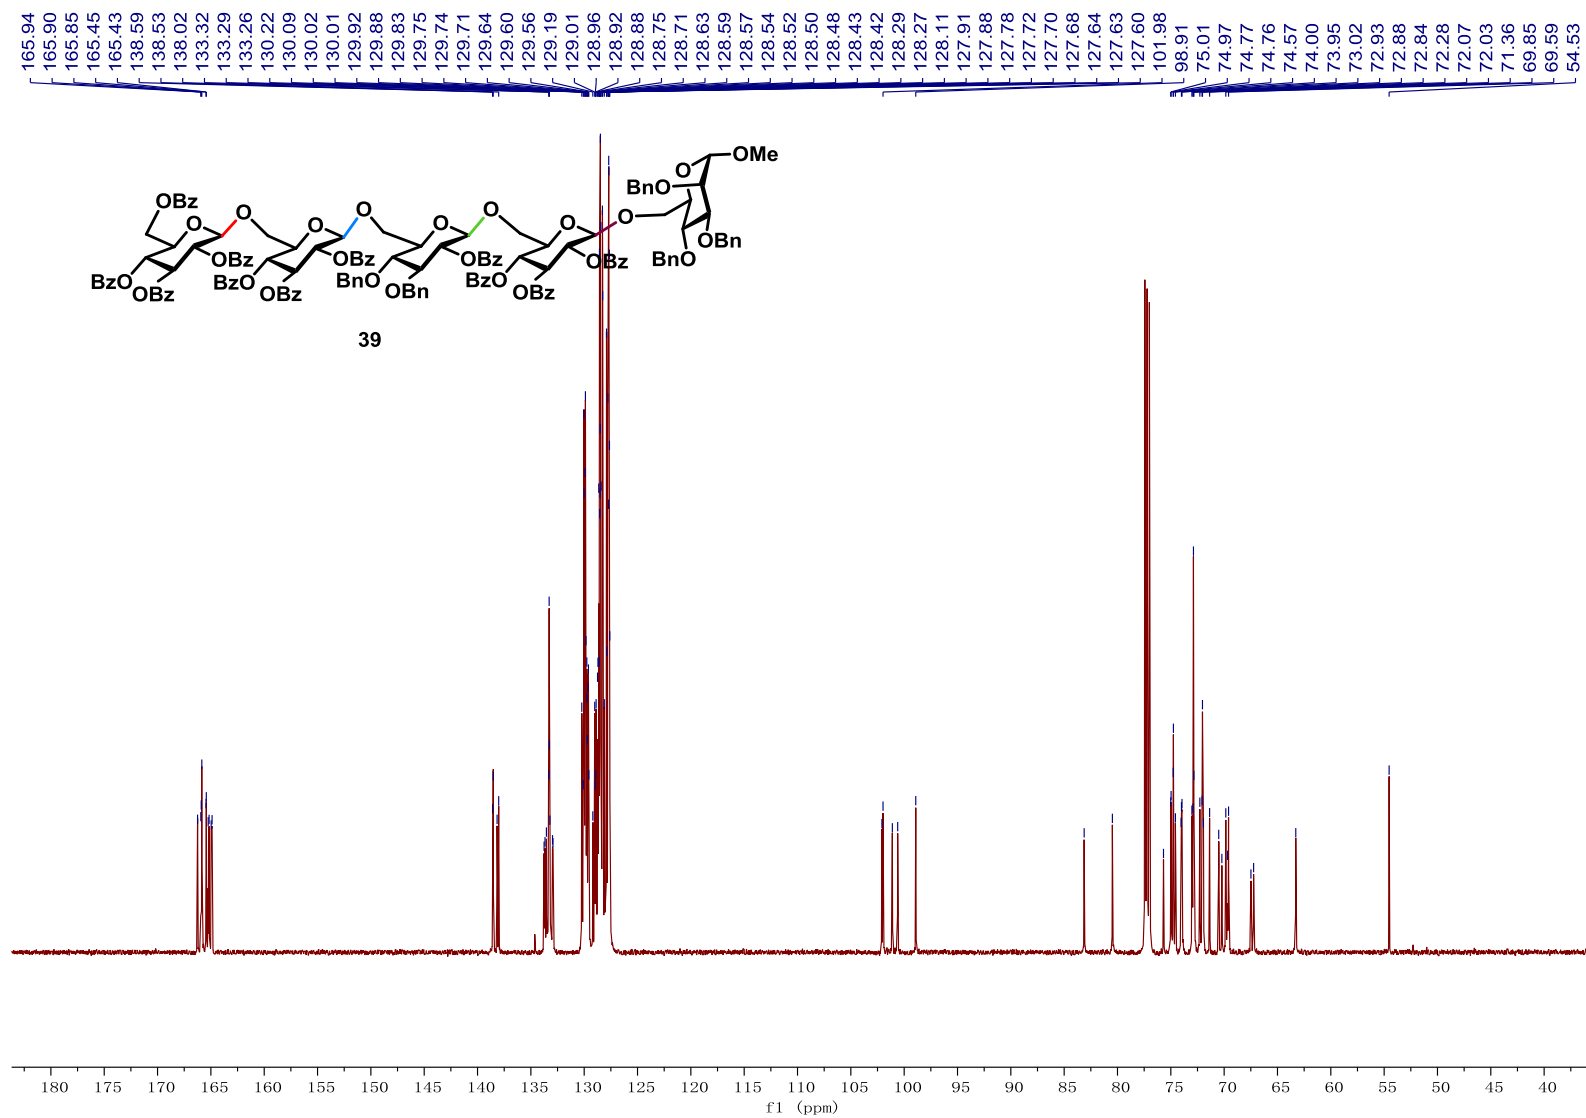

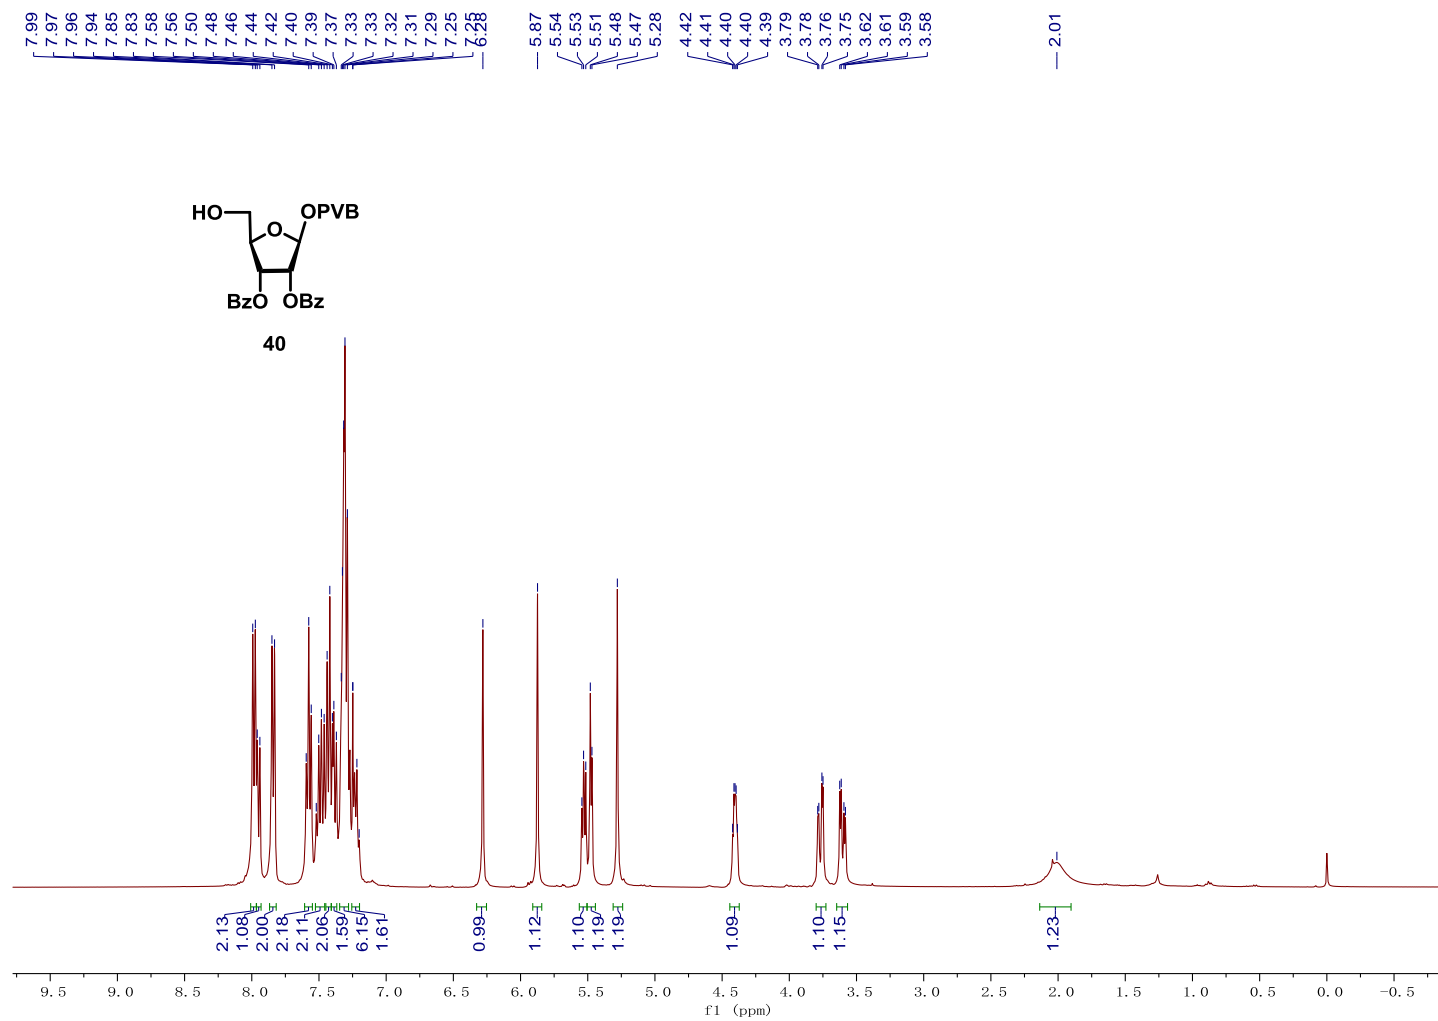

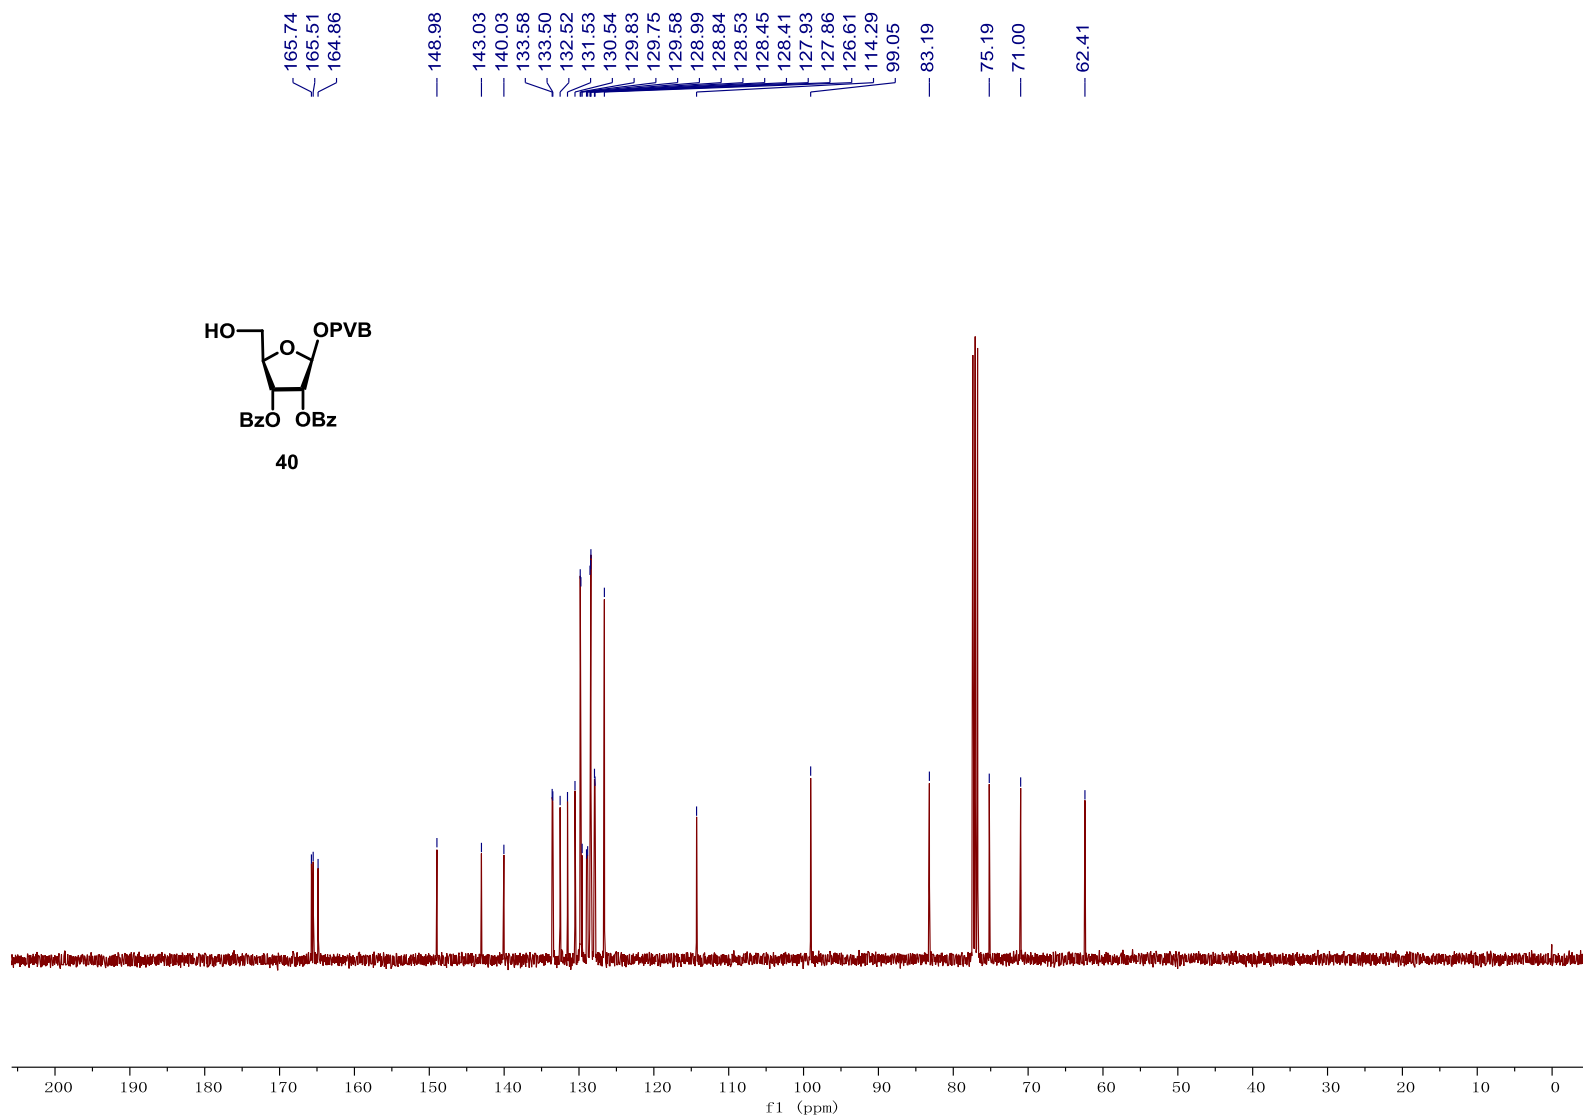

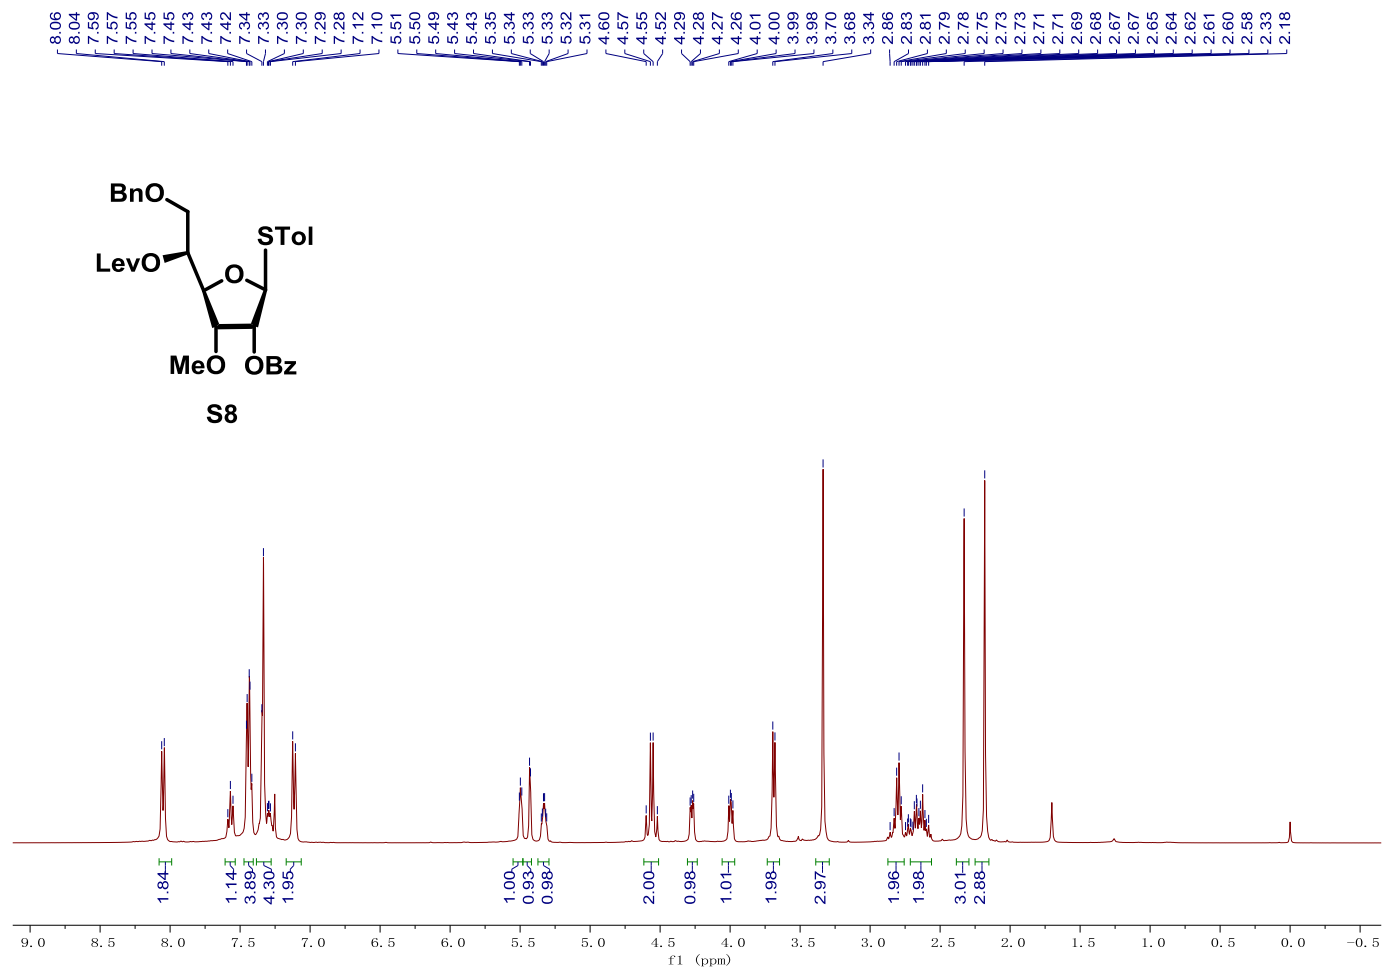

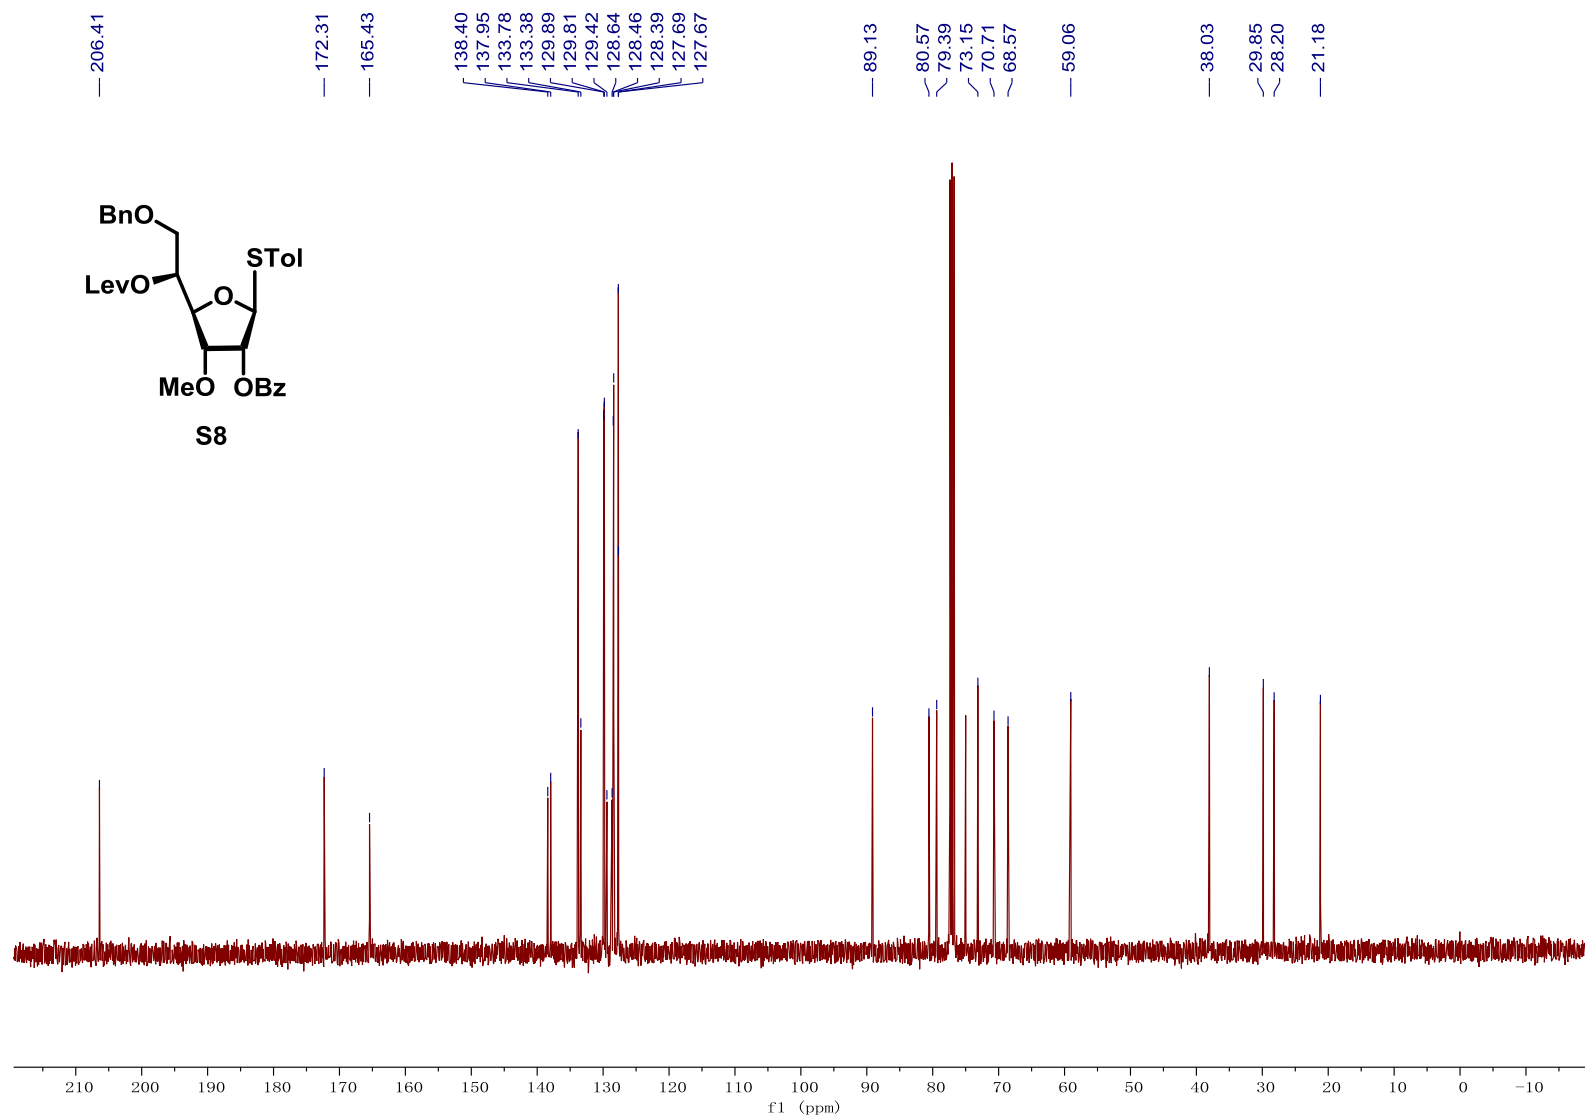

S138

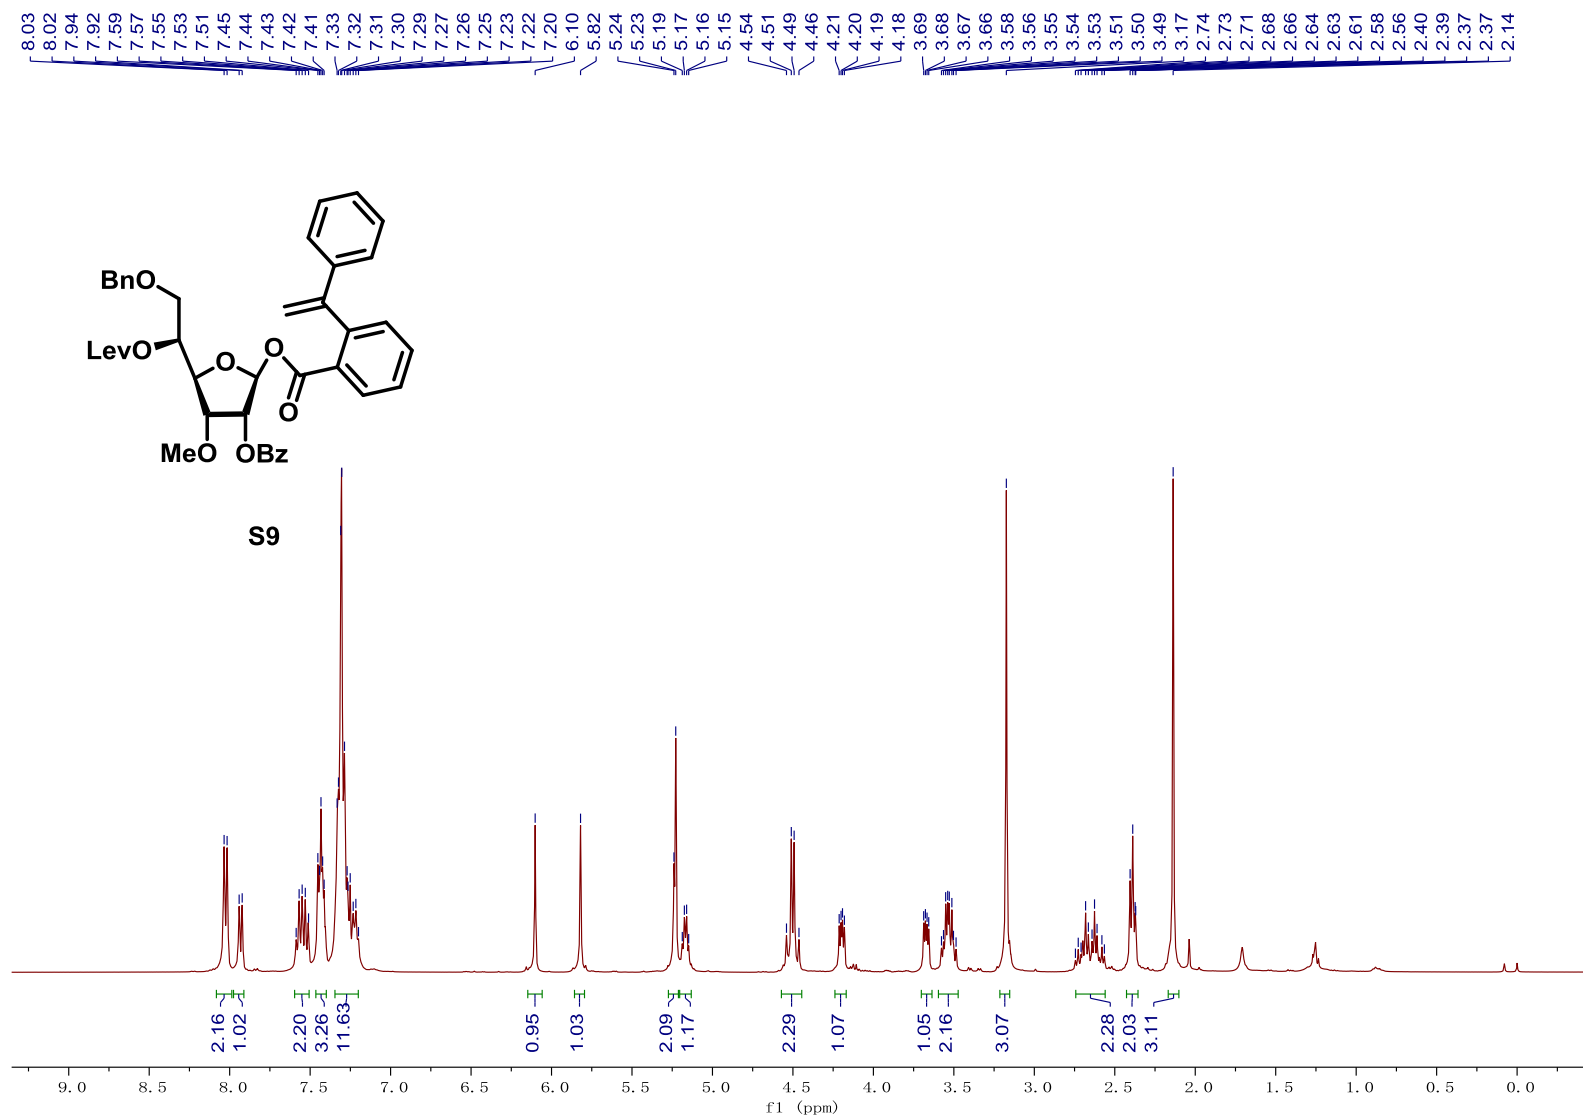

S139

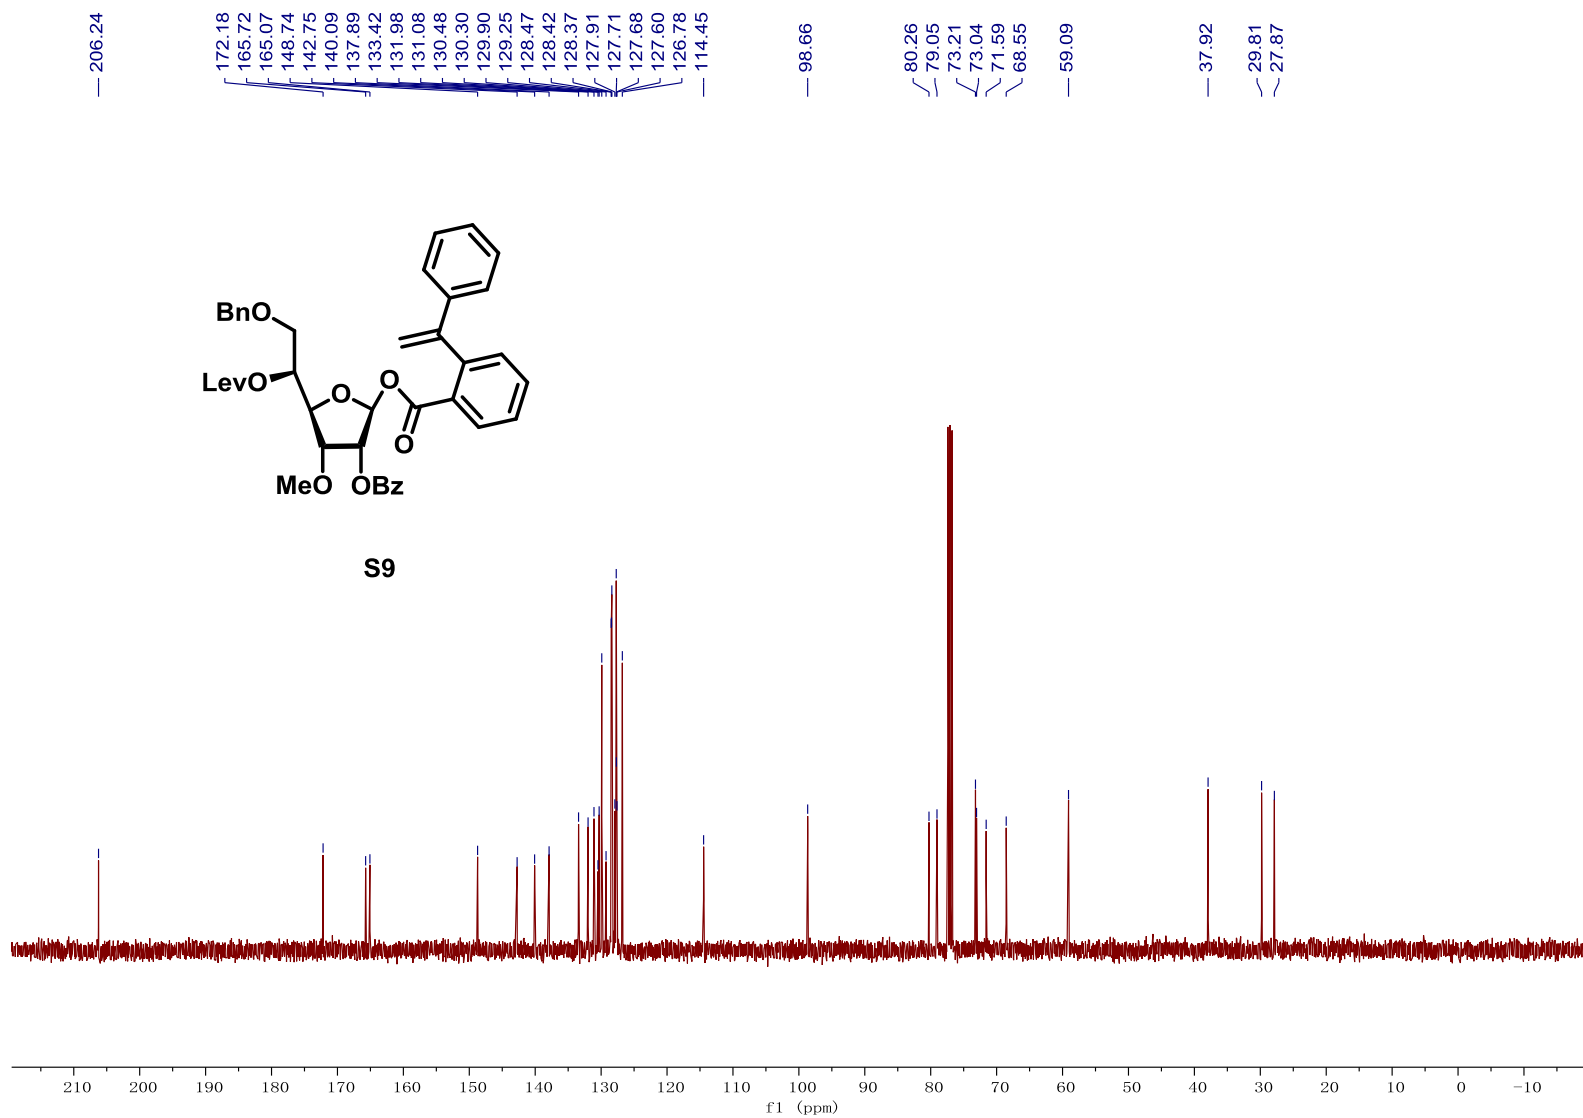

S140



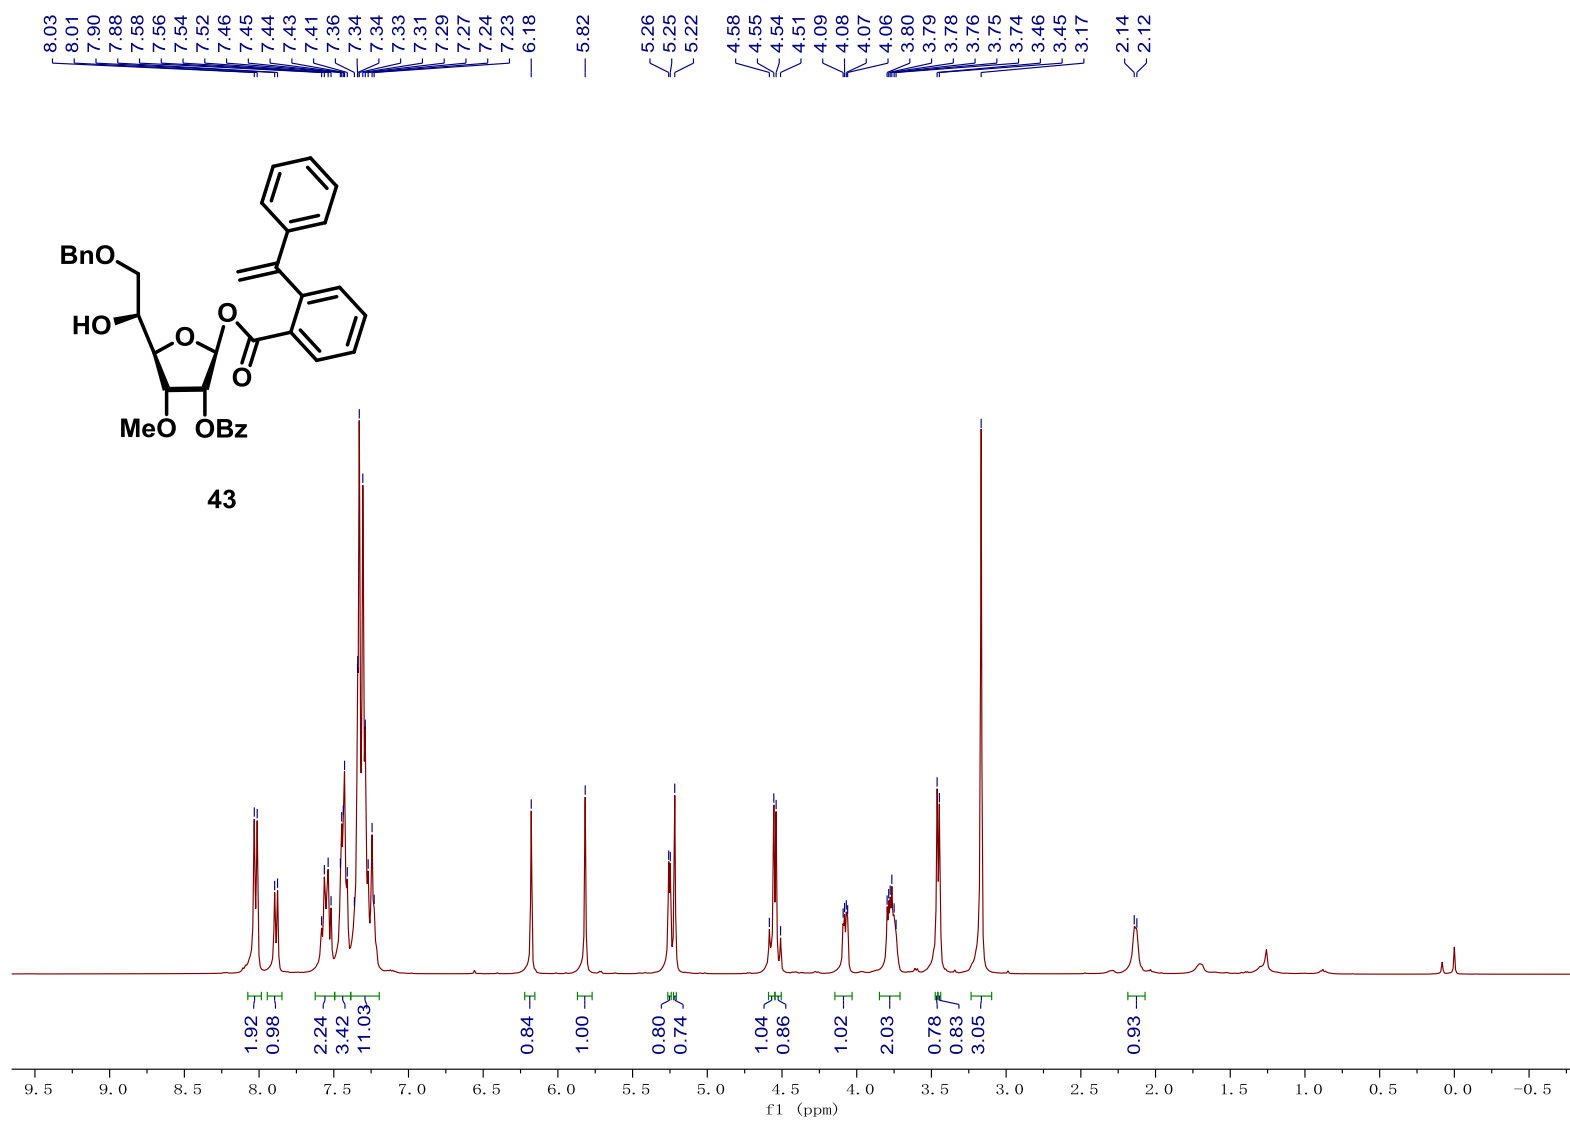

S141

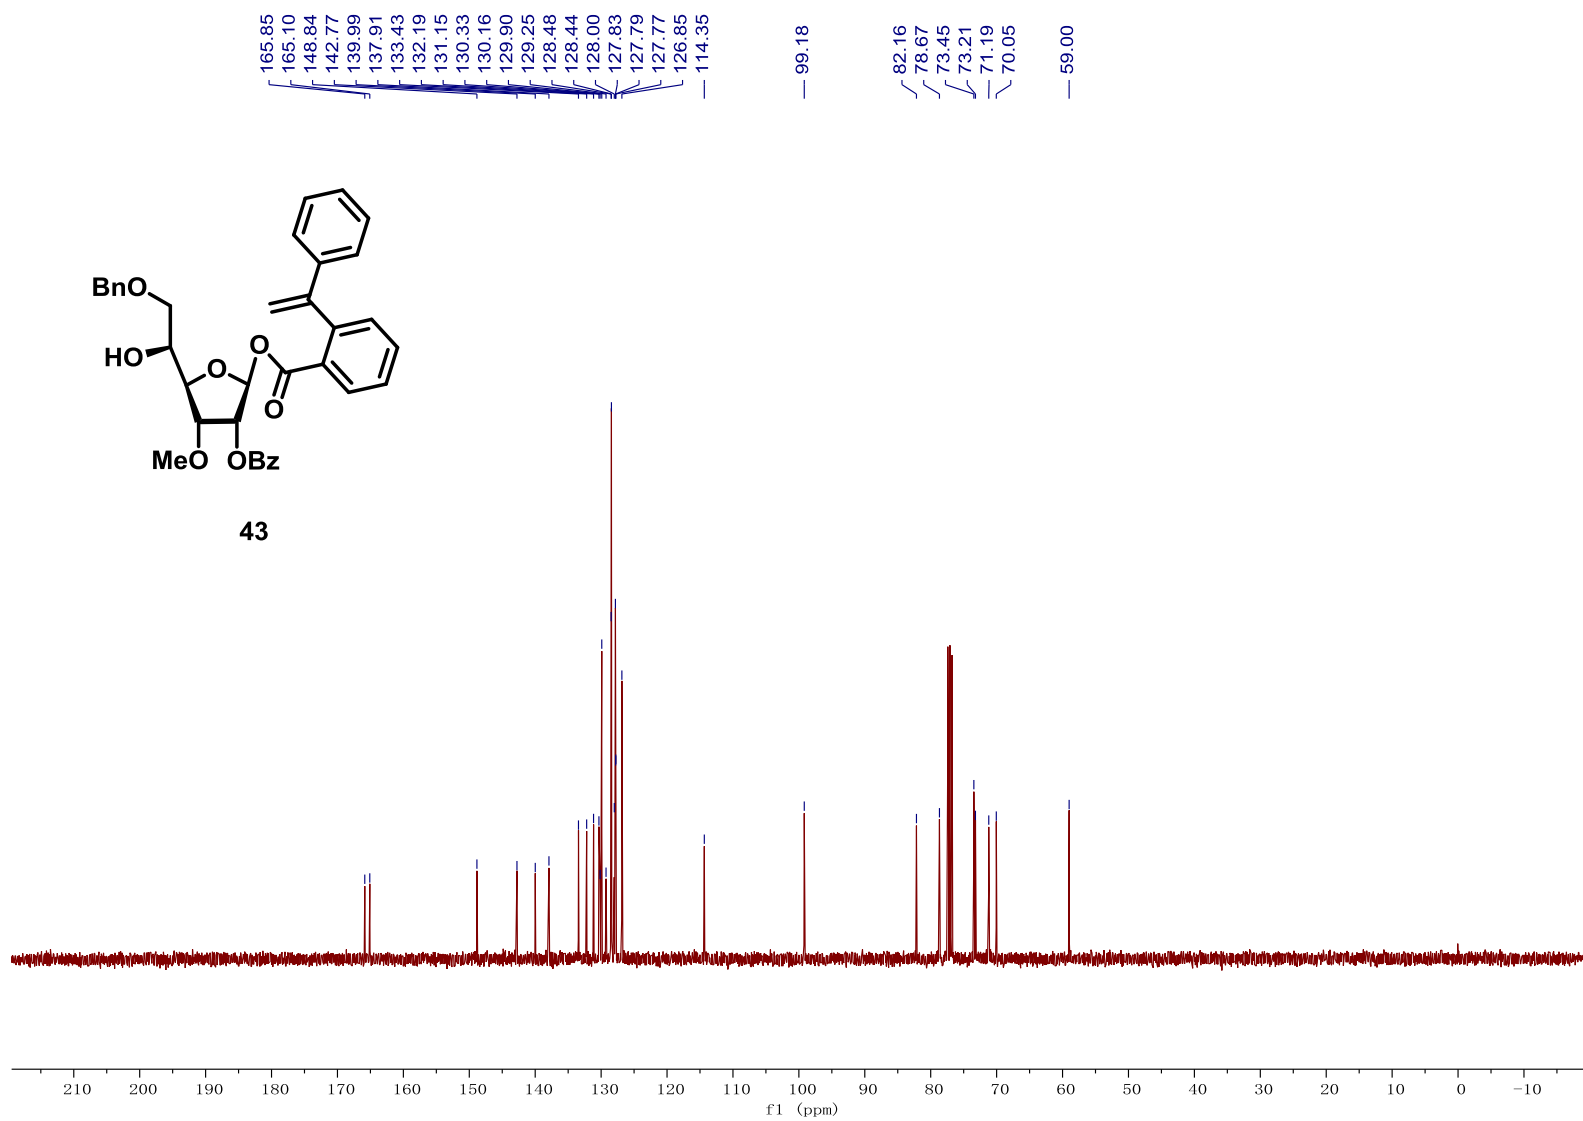

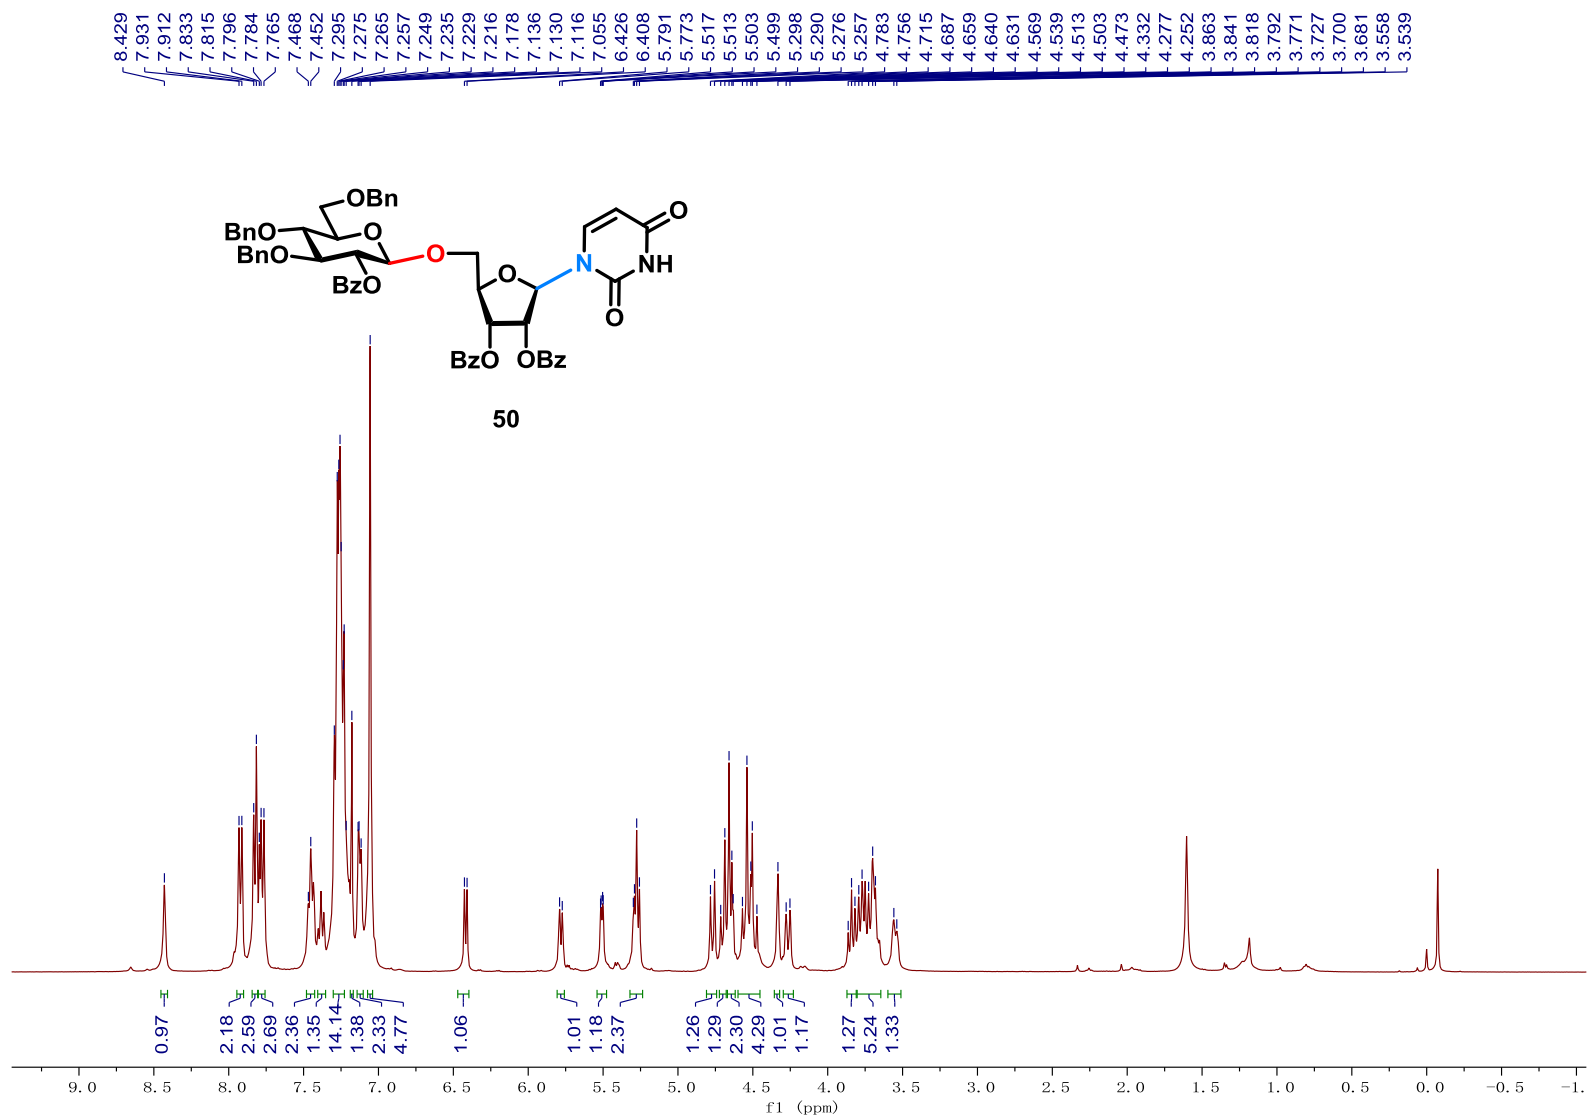

S143

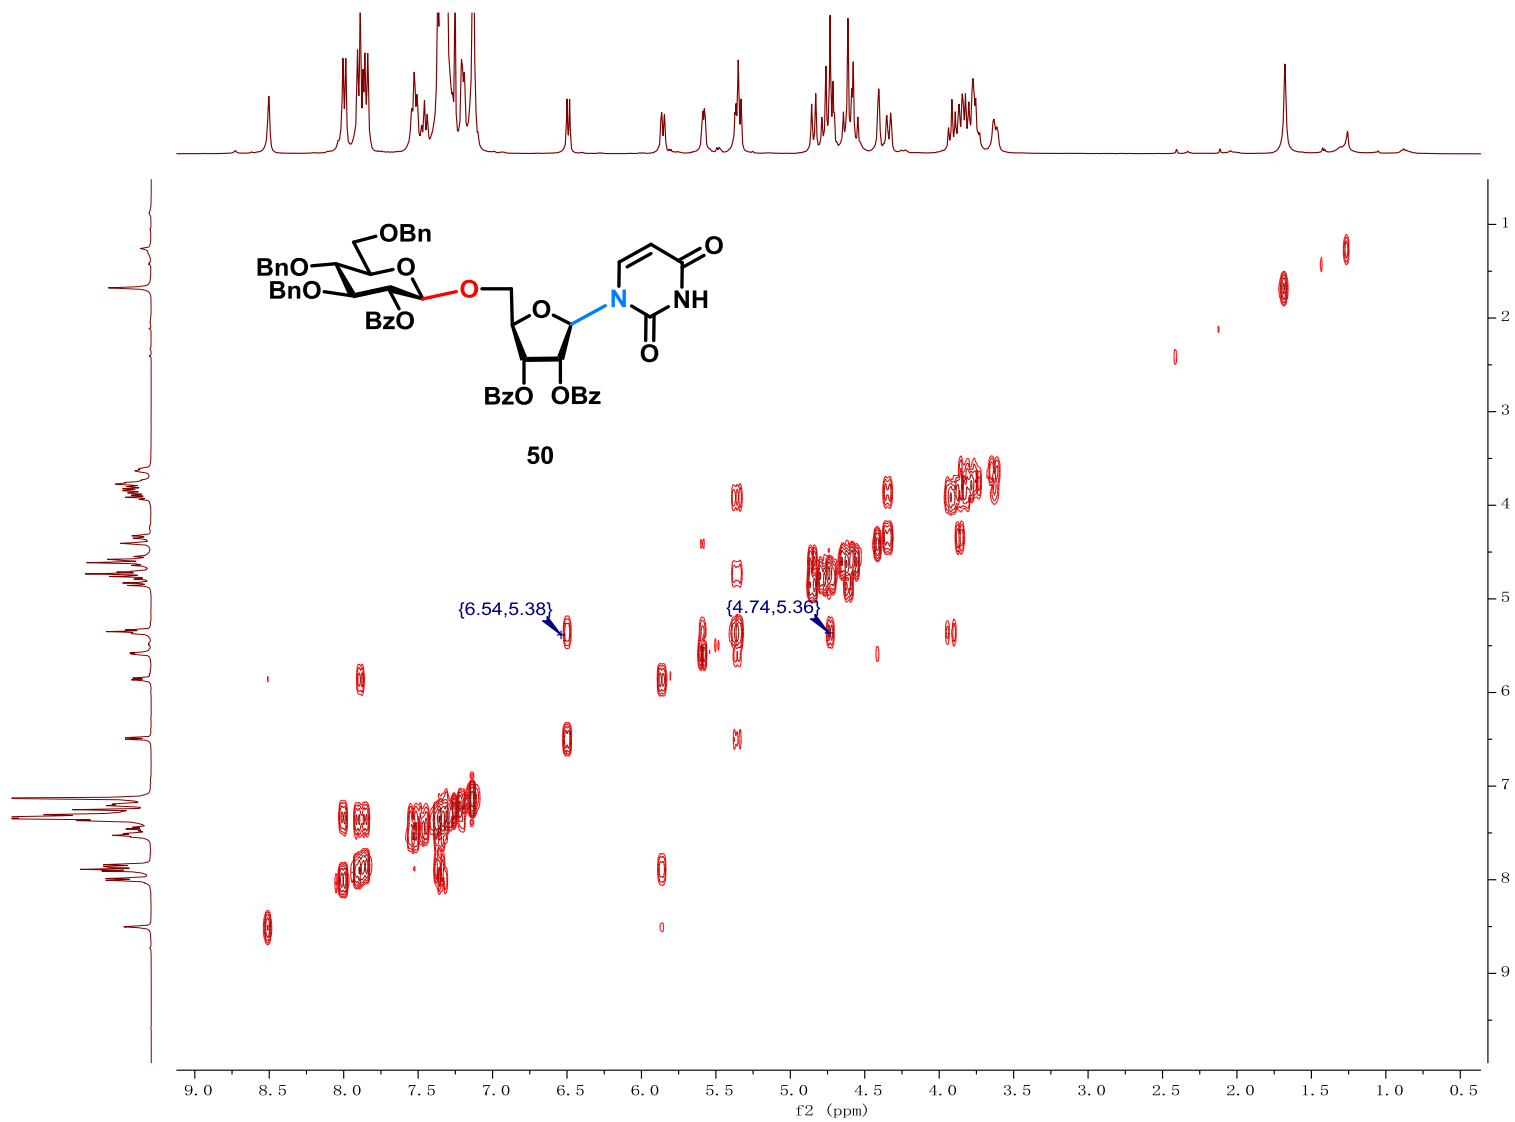

S144

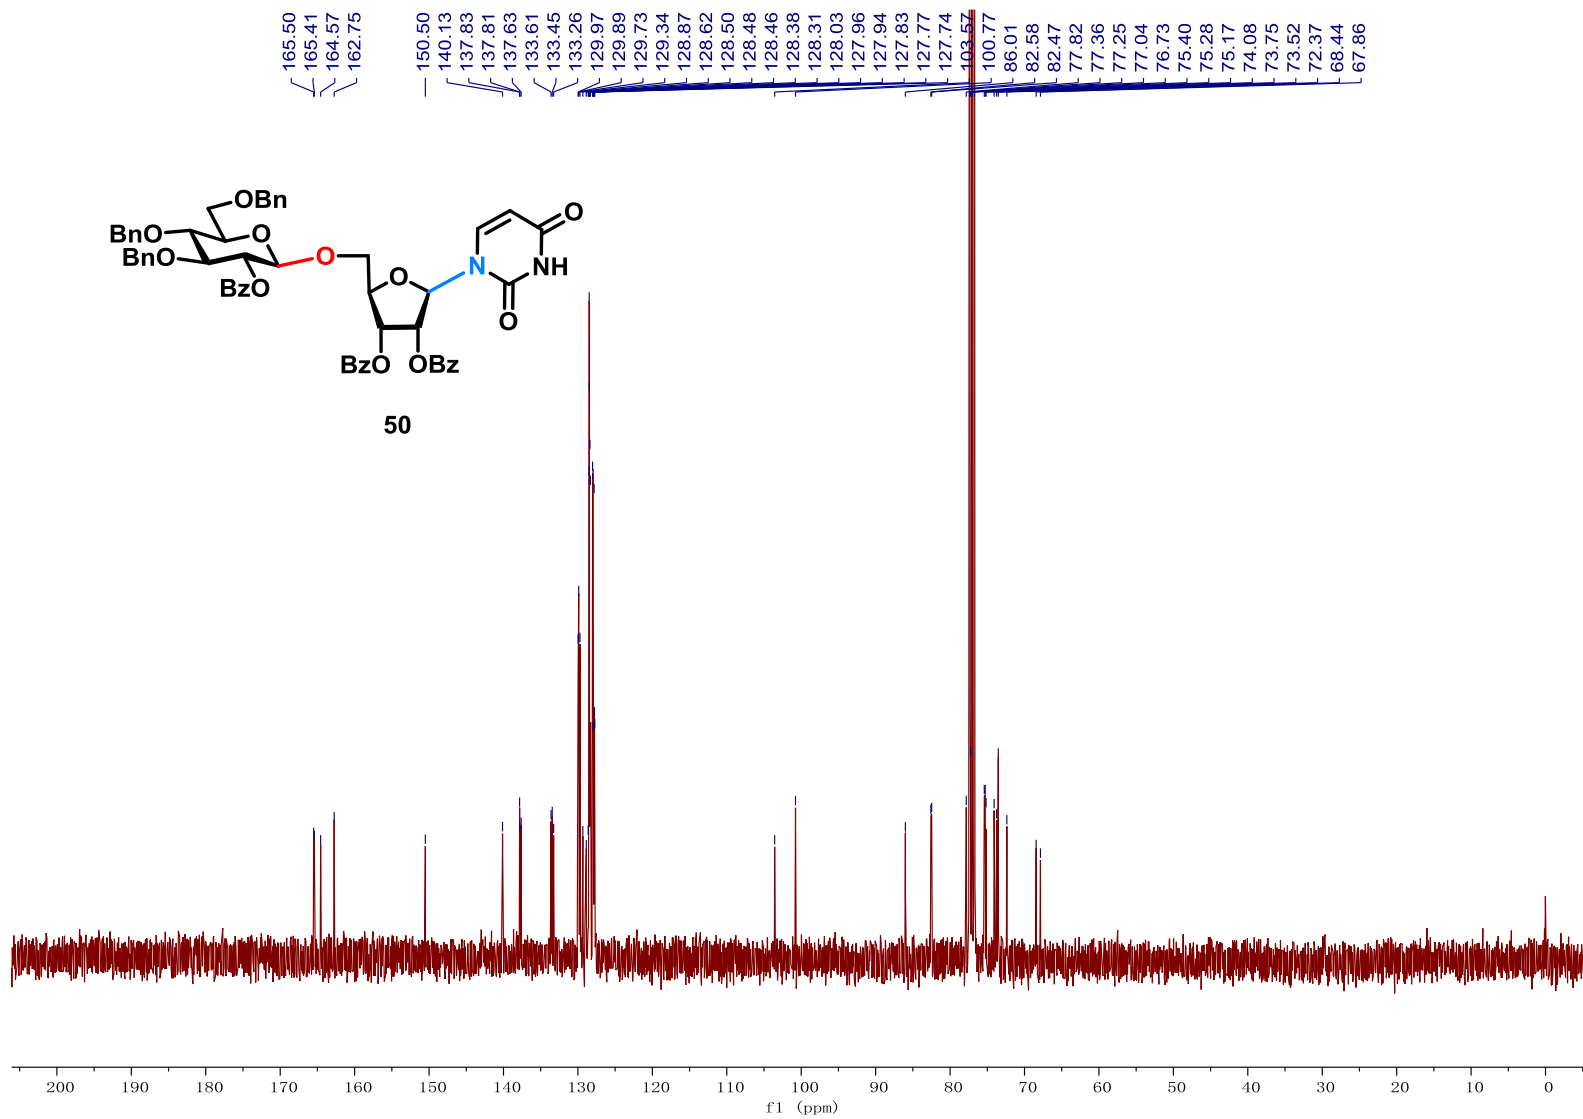

S145

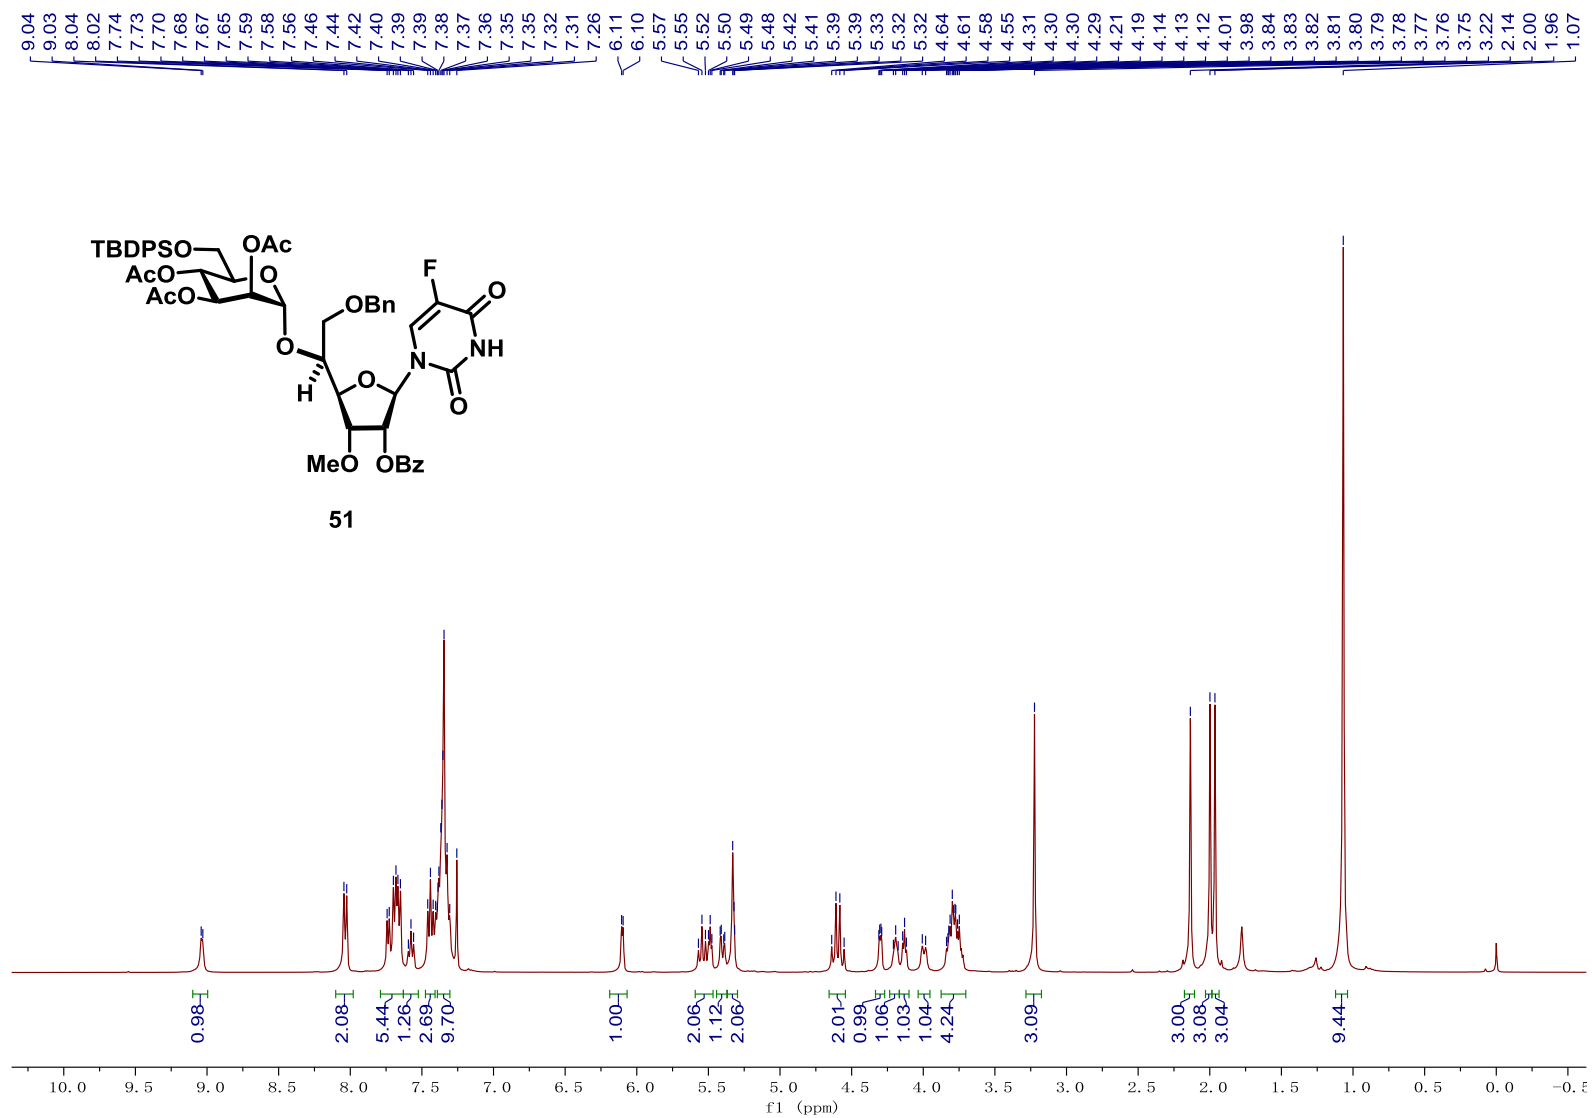

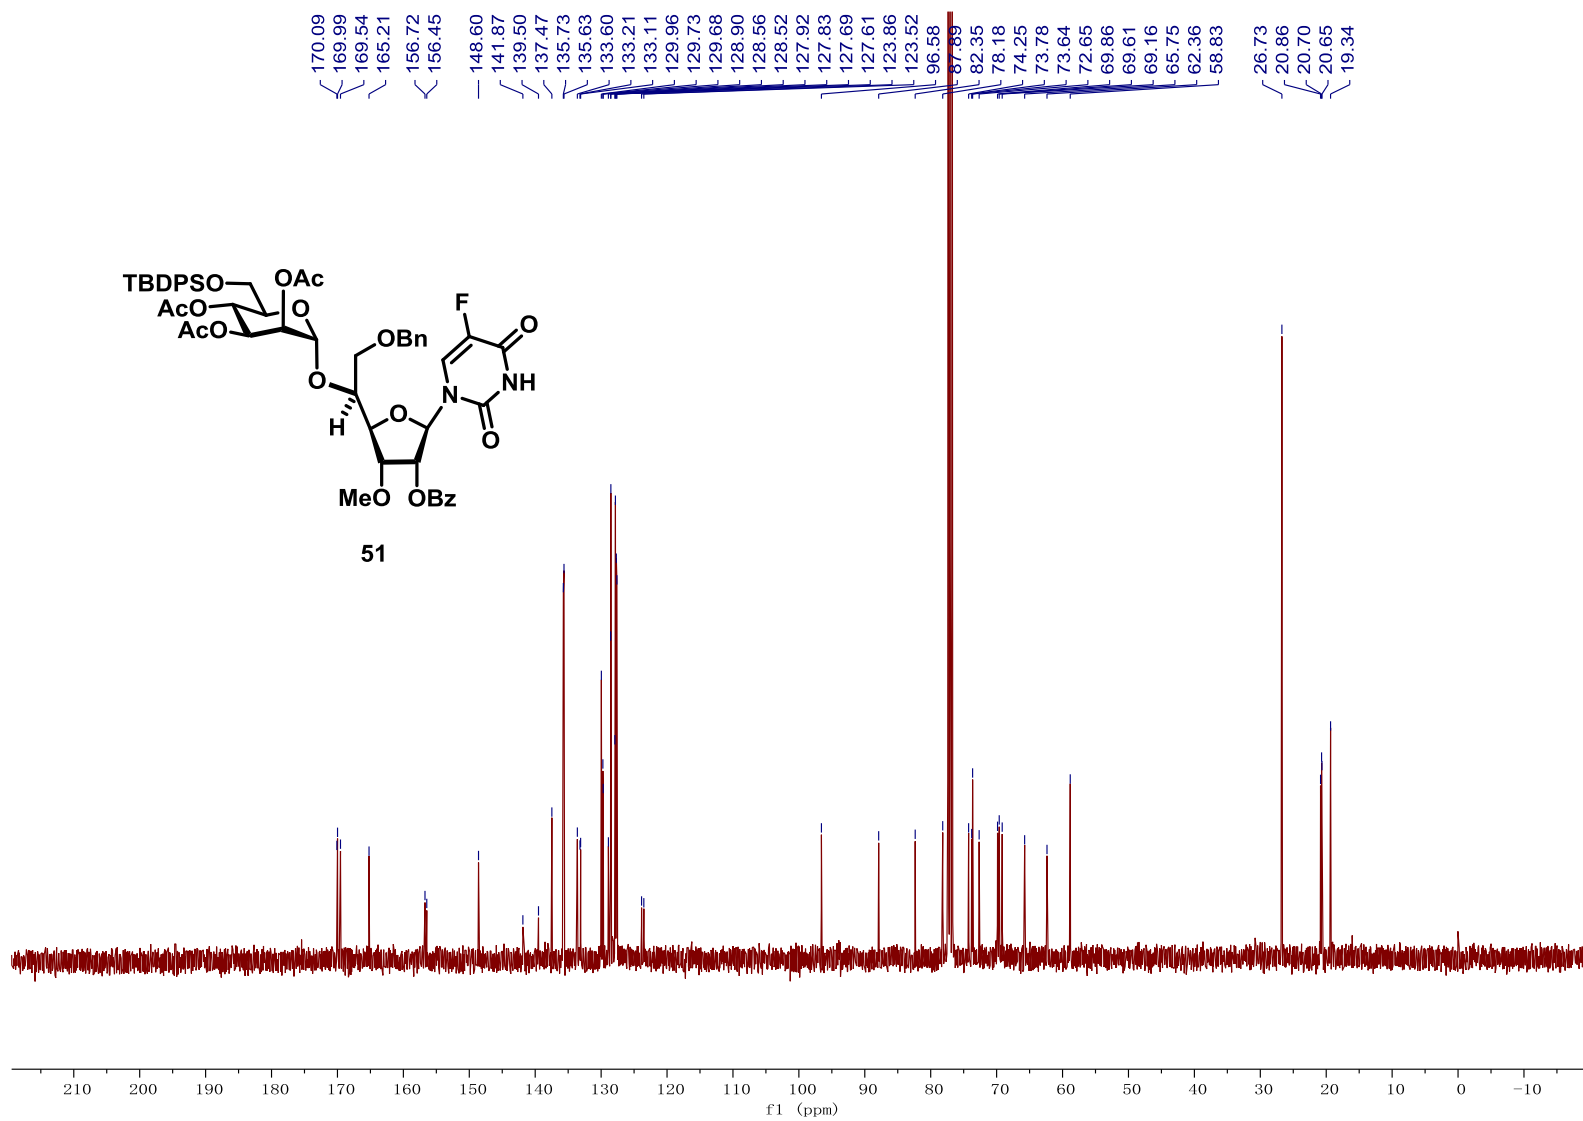

S147

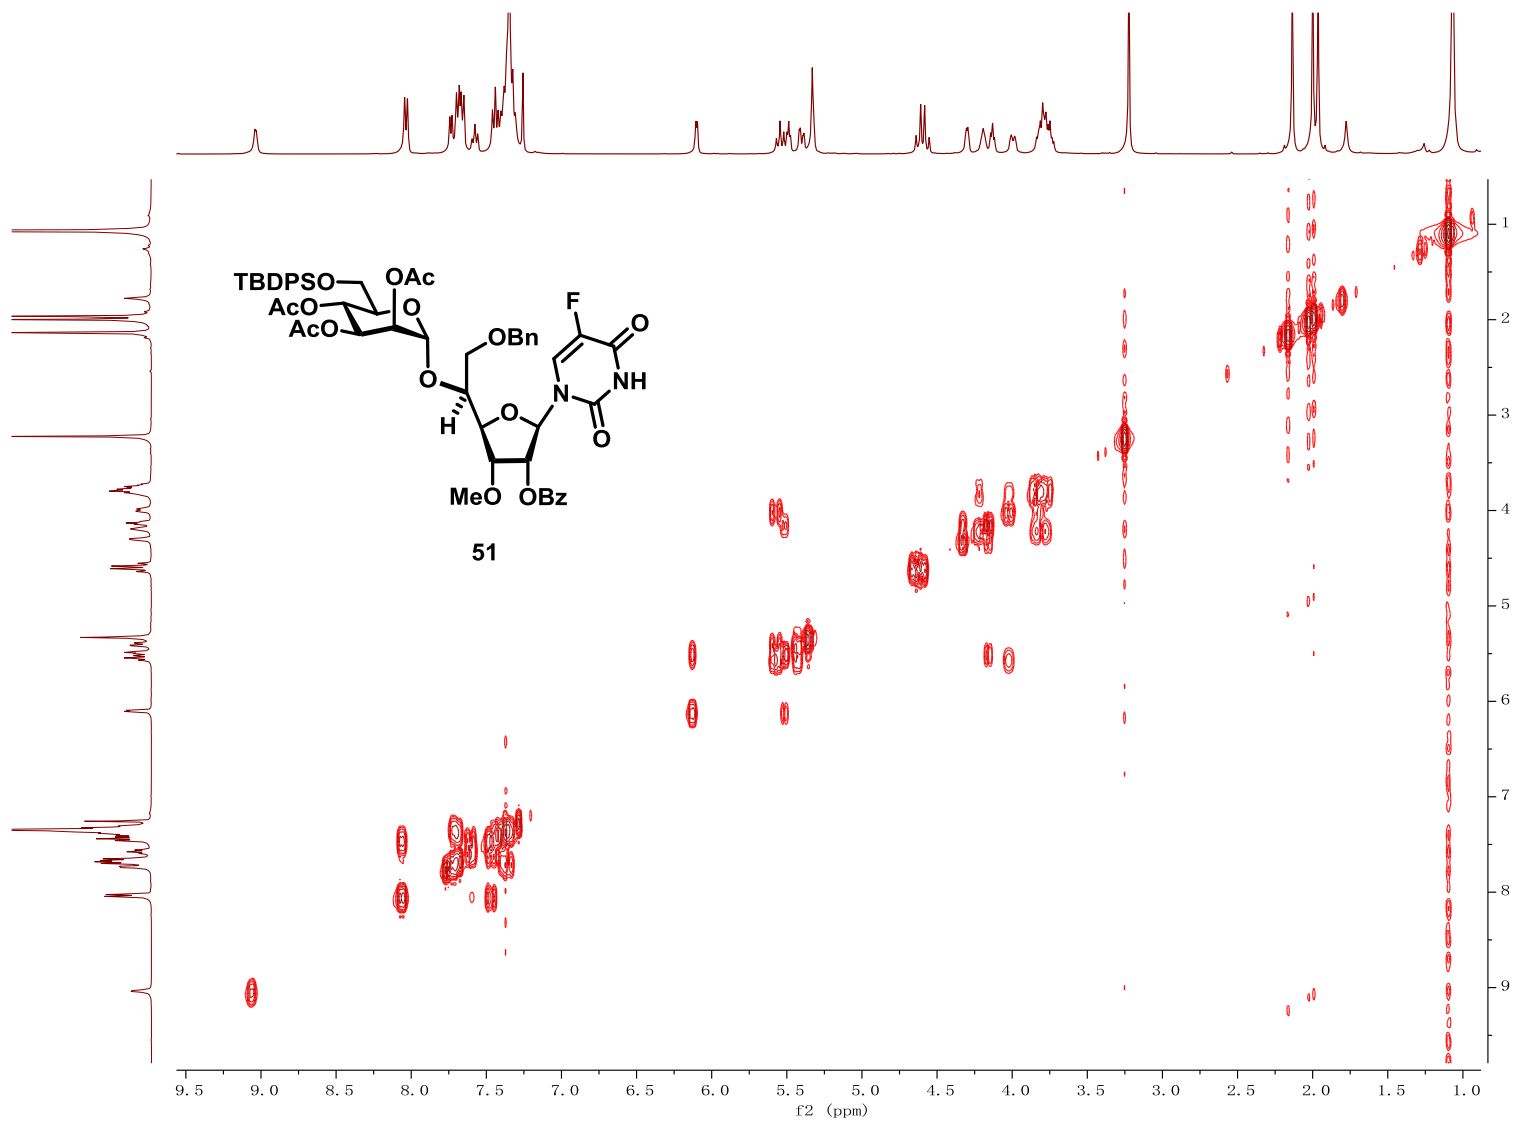



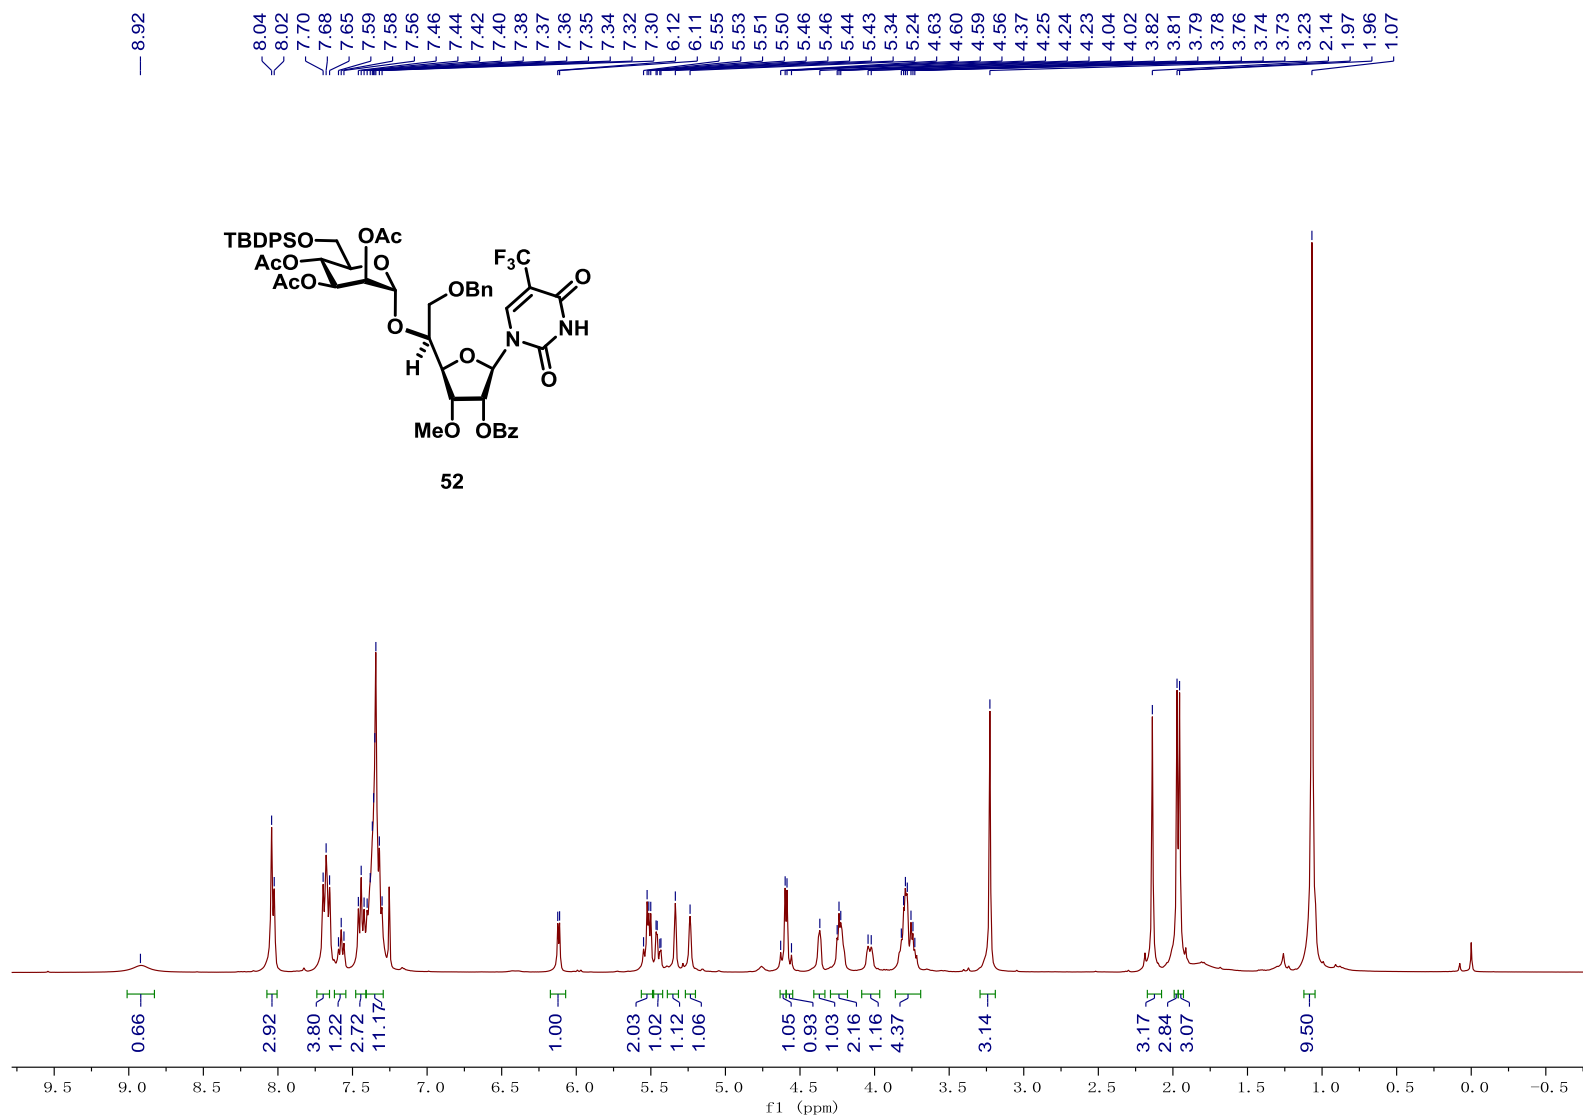

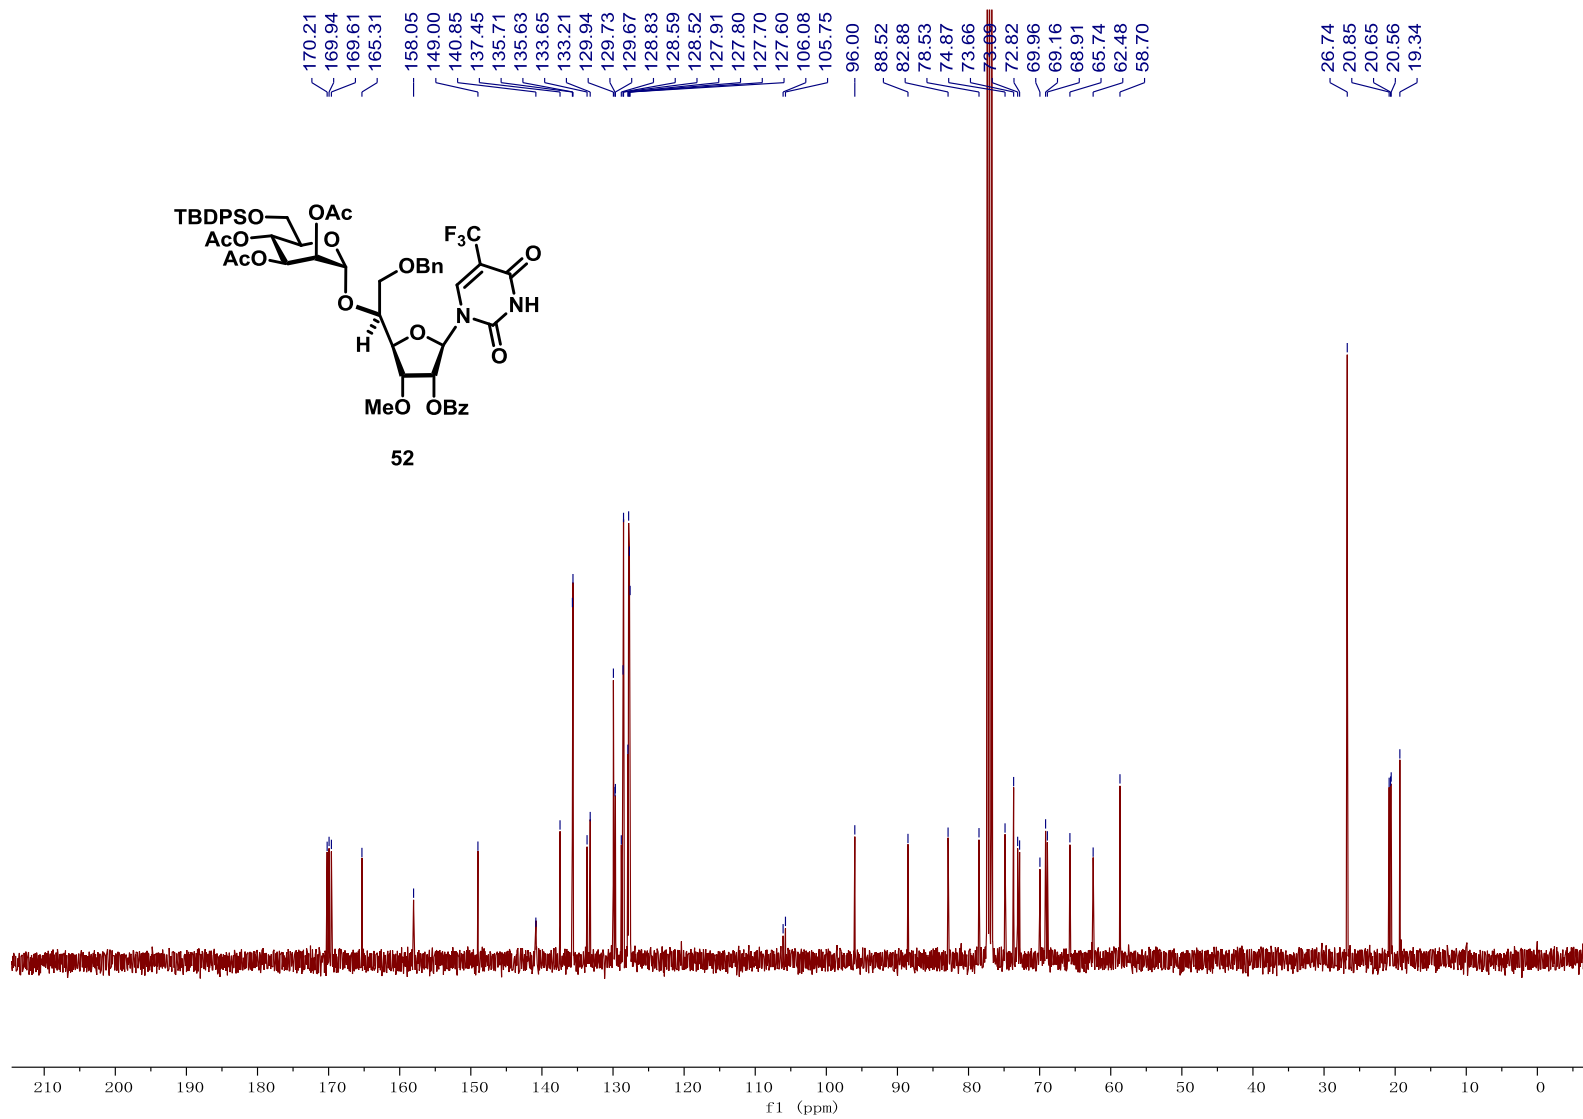

S150

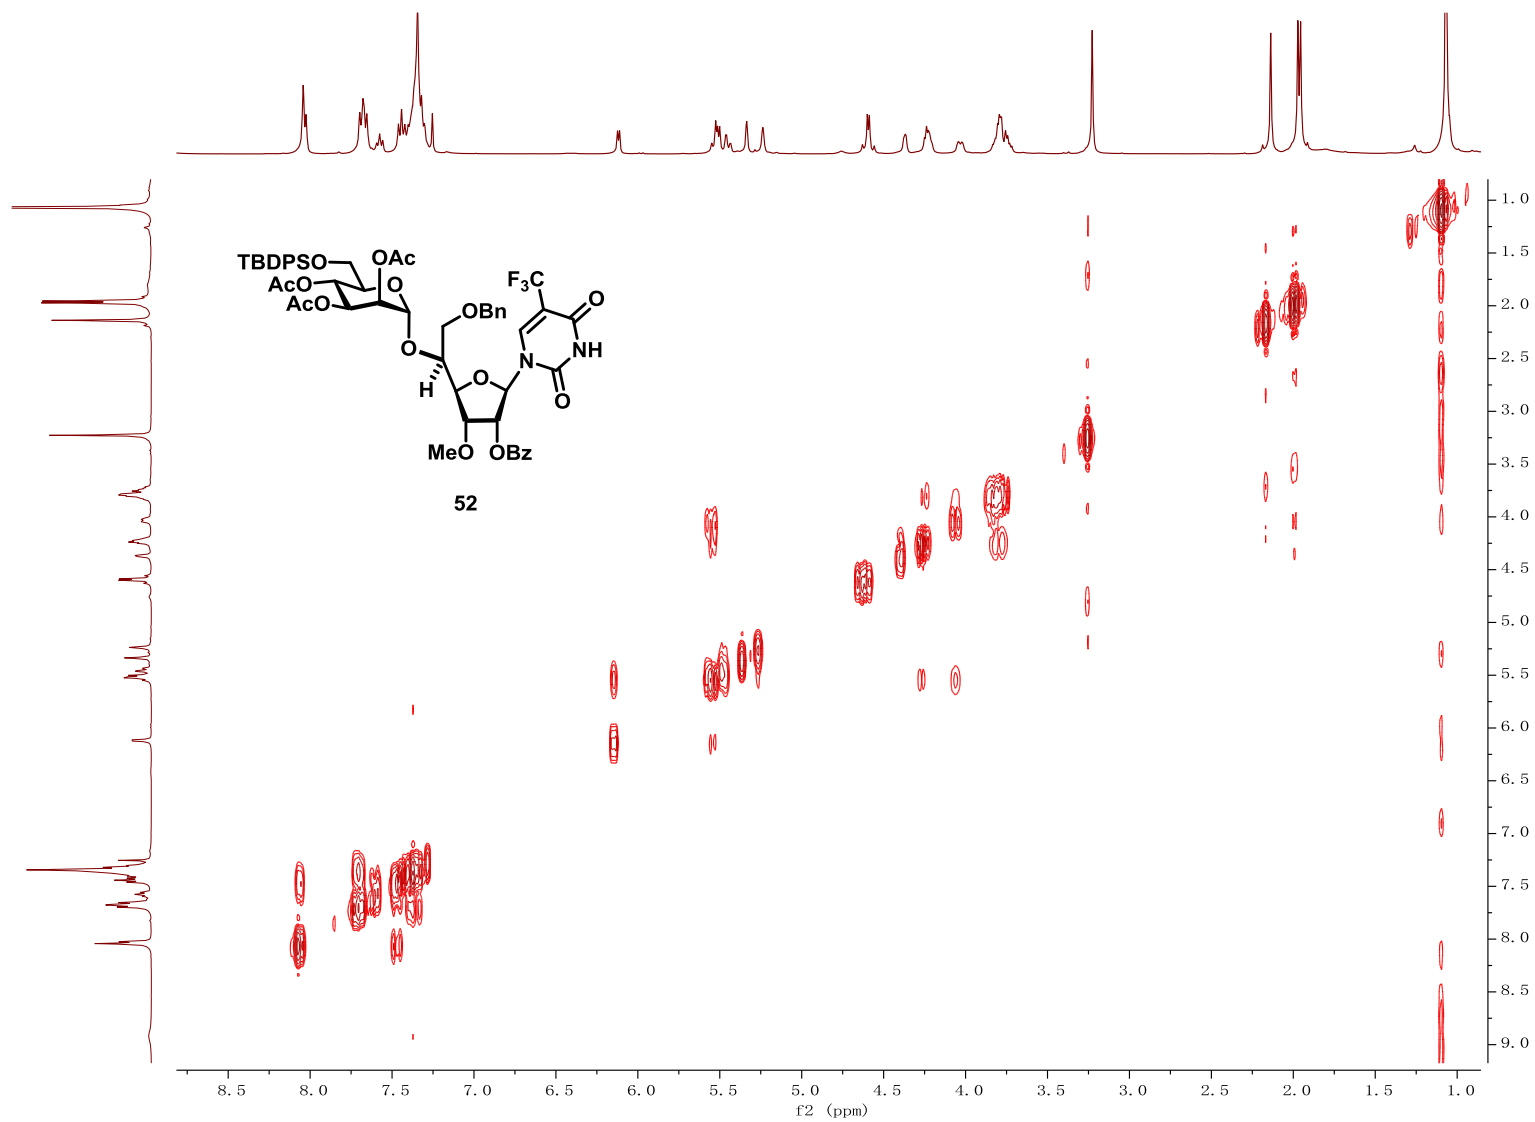

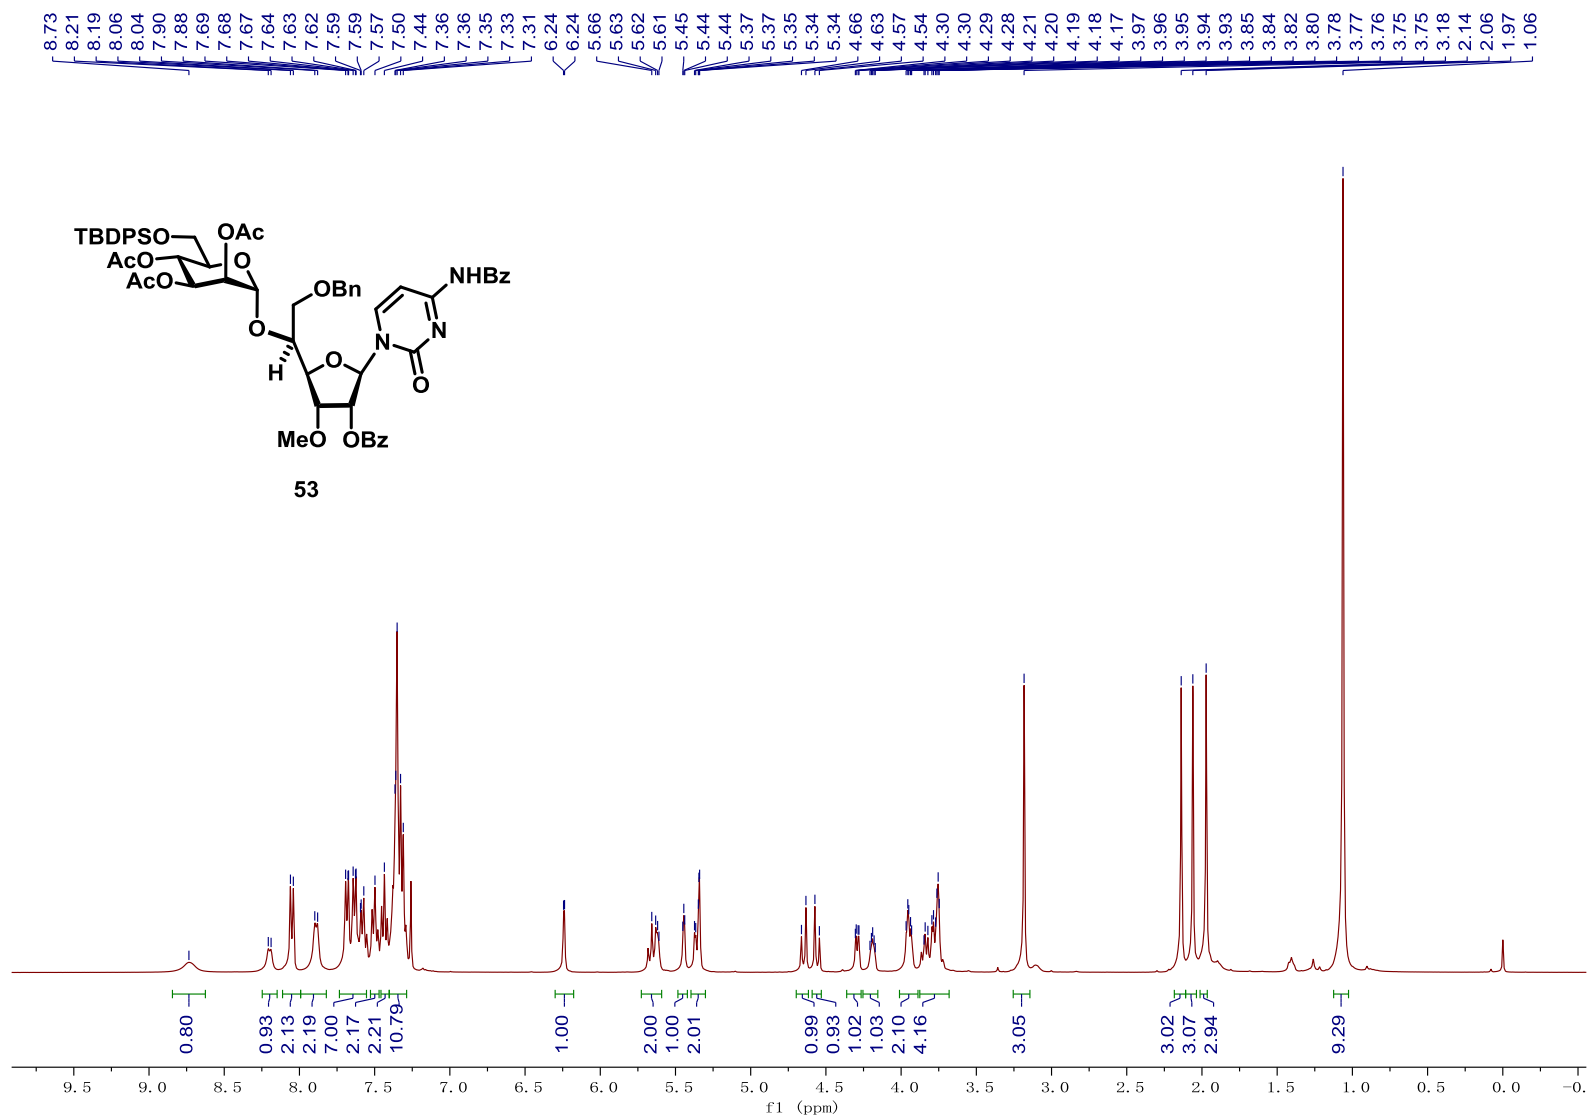

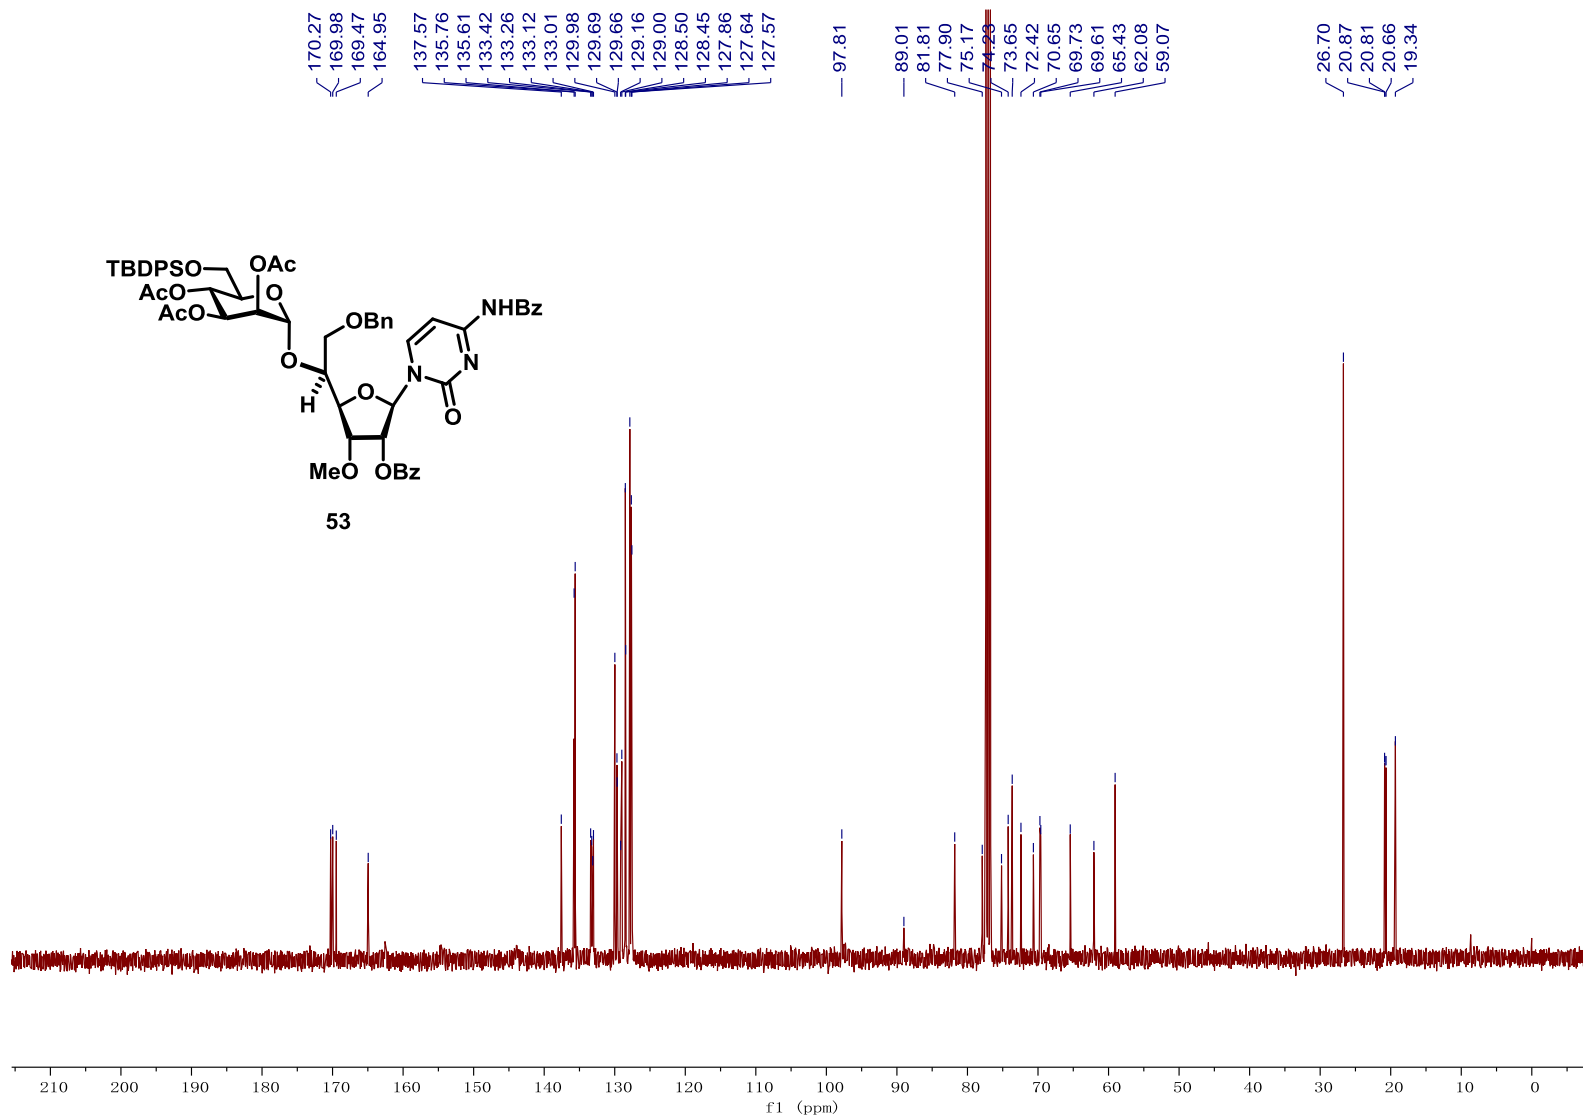

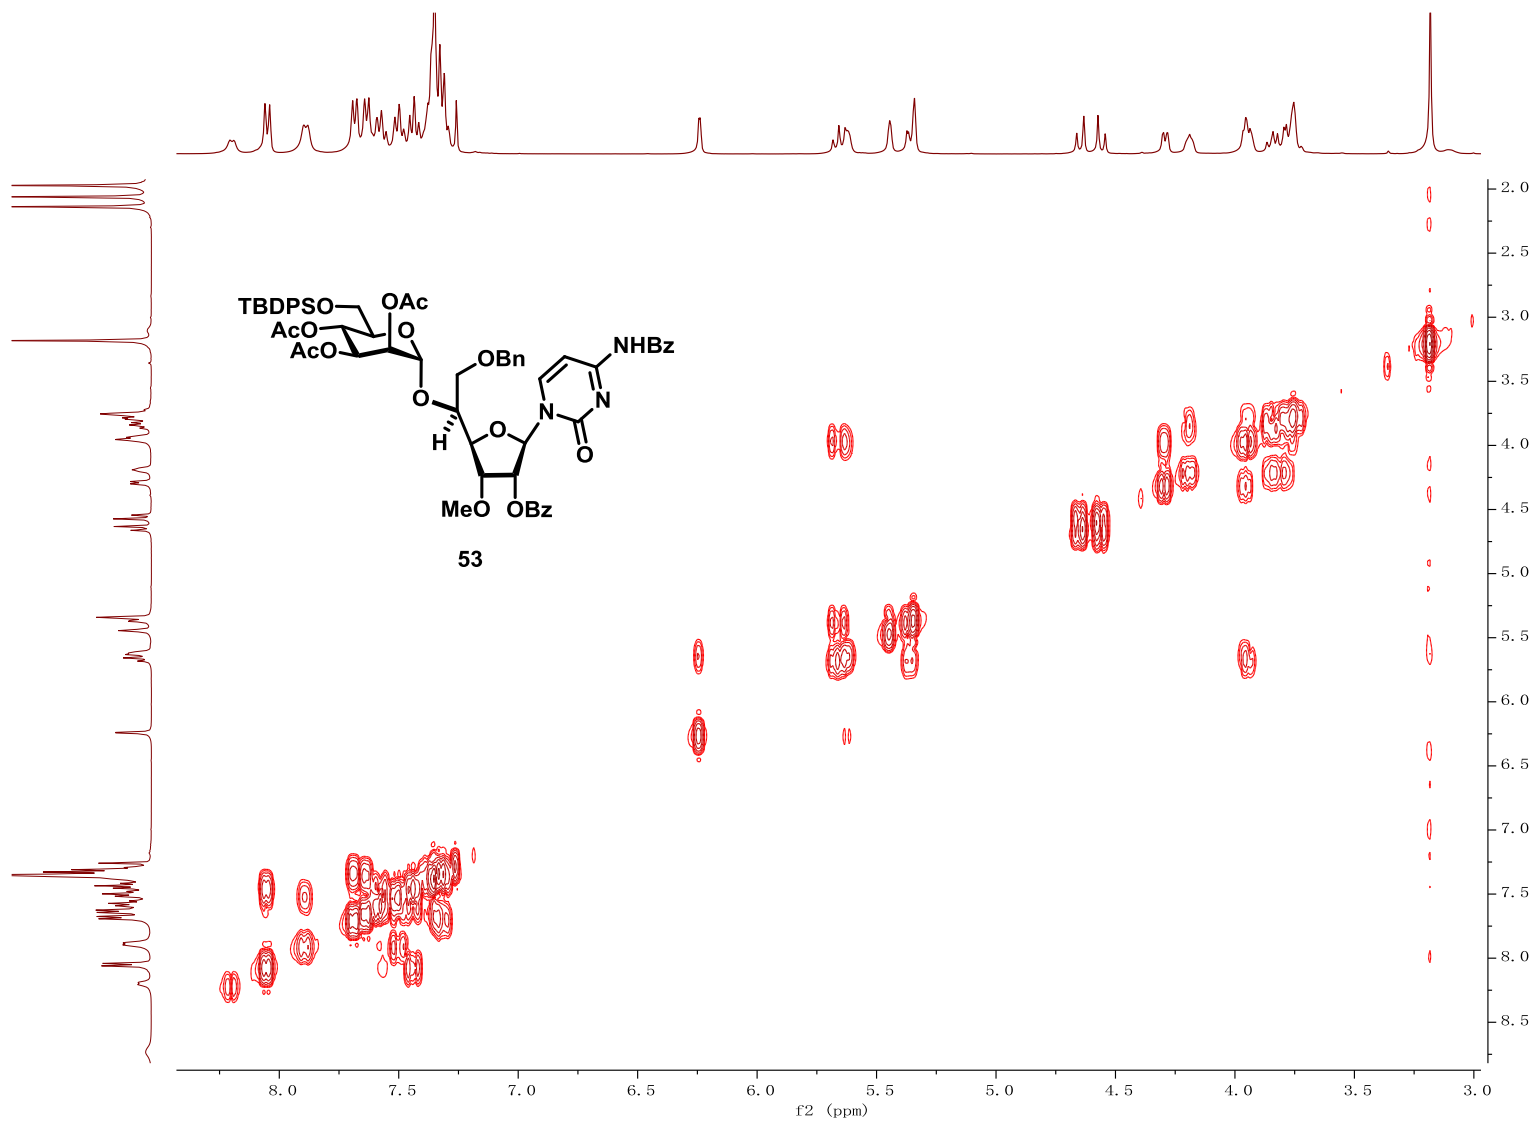

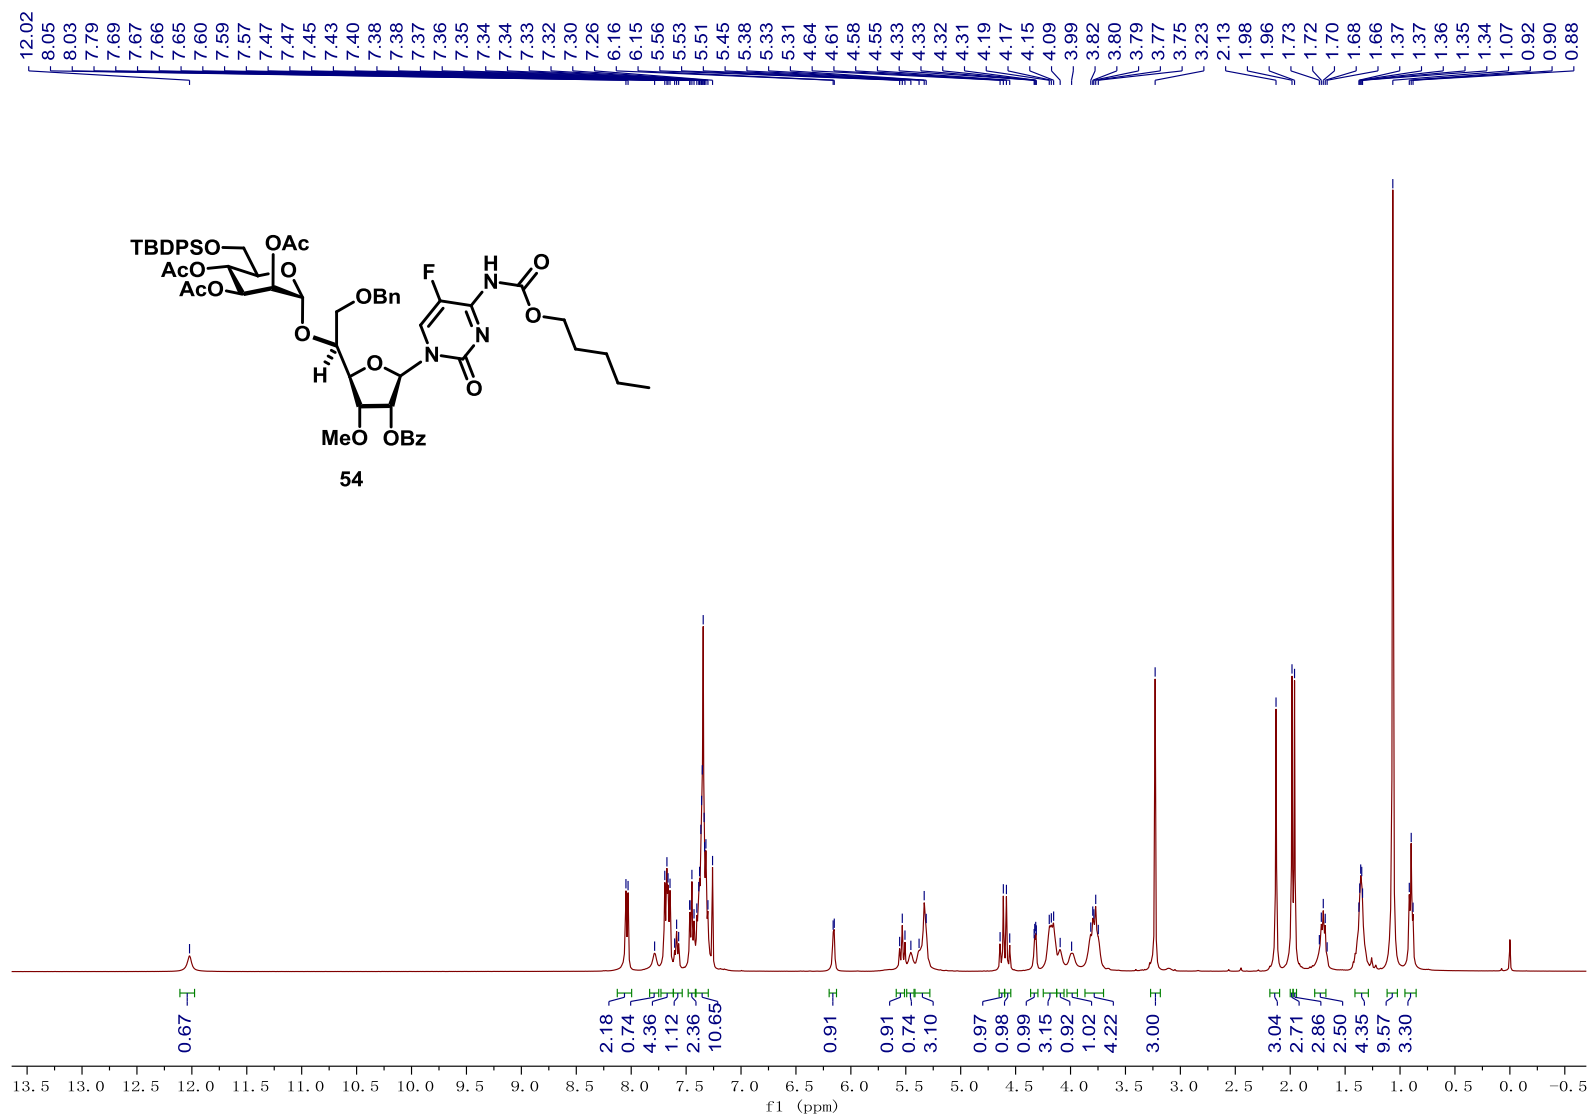

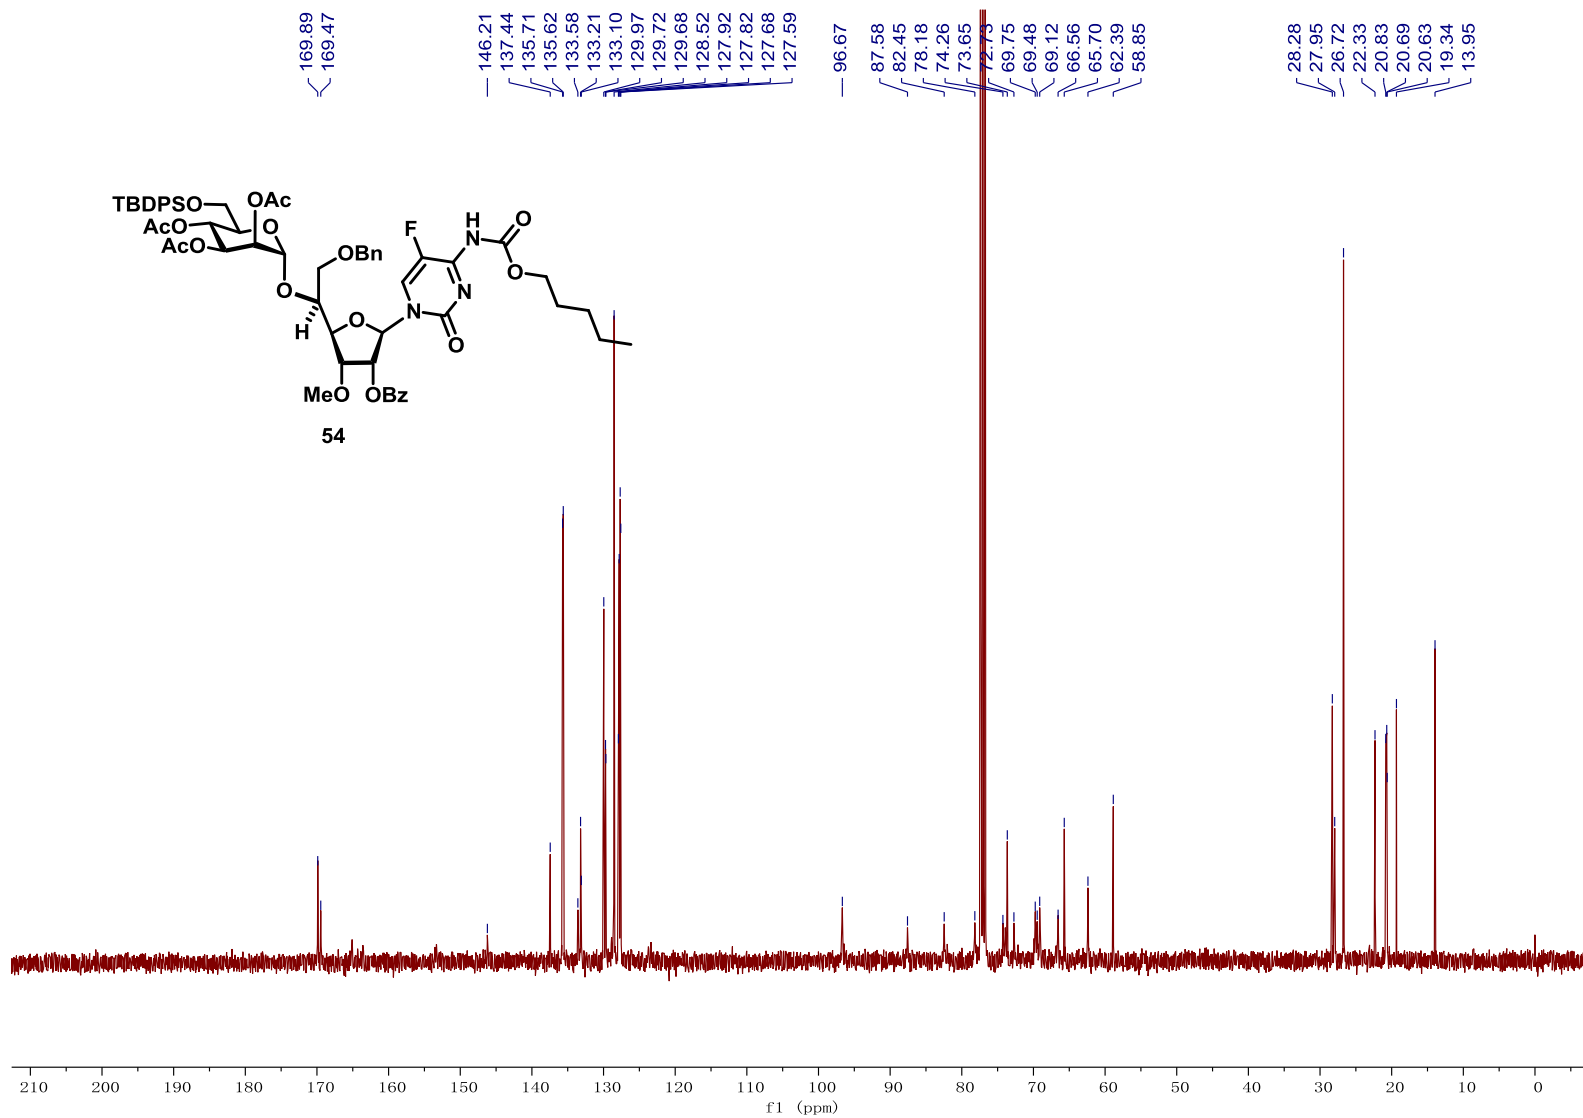

S156





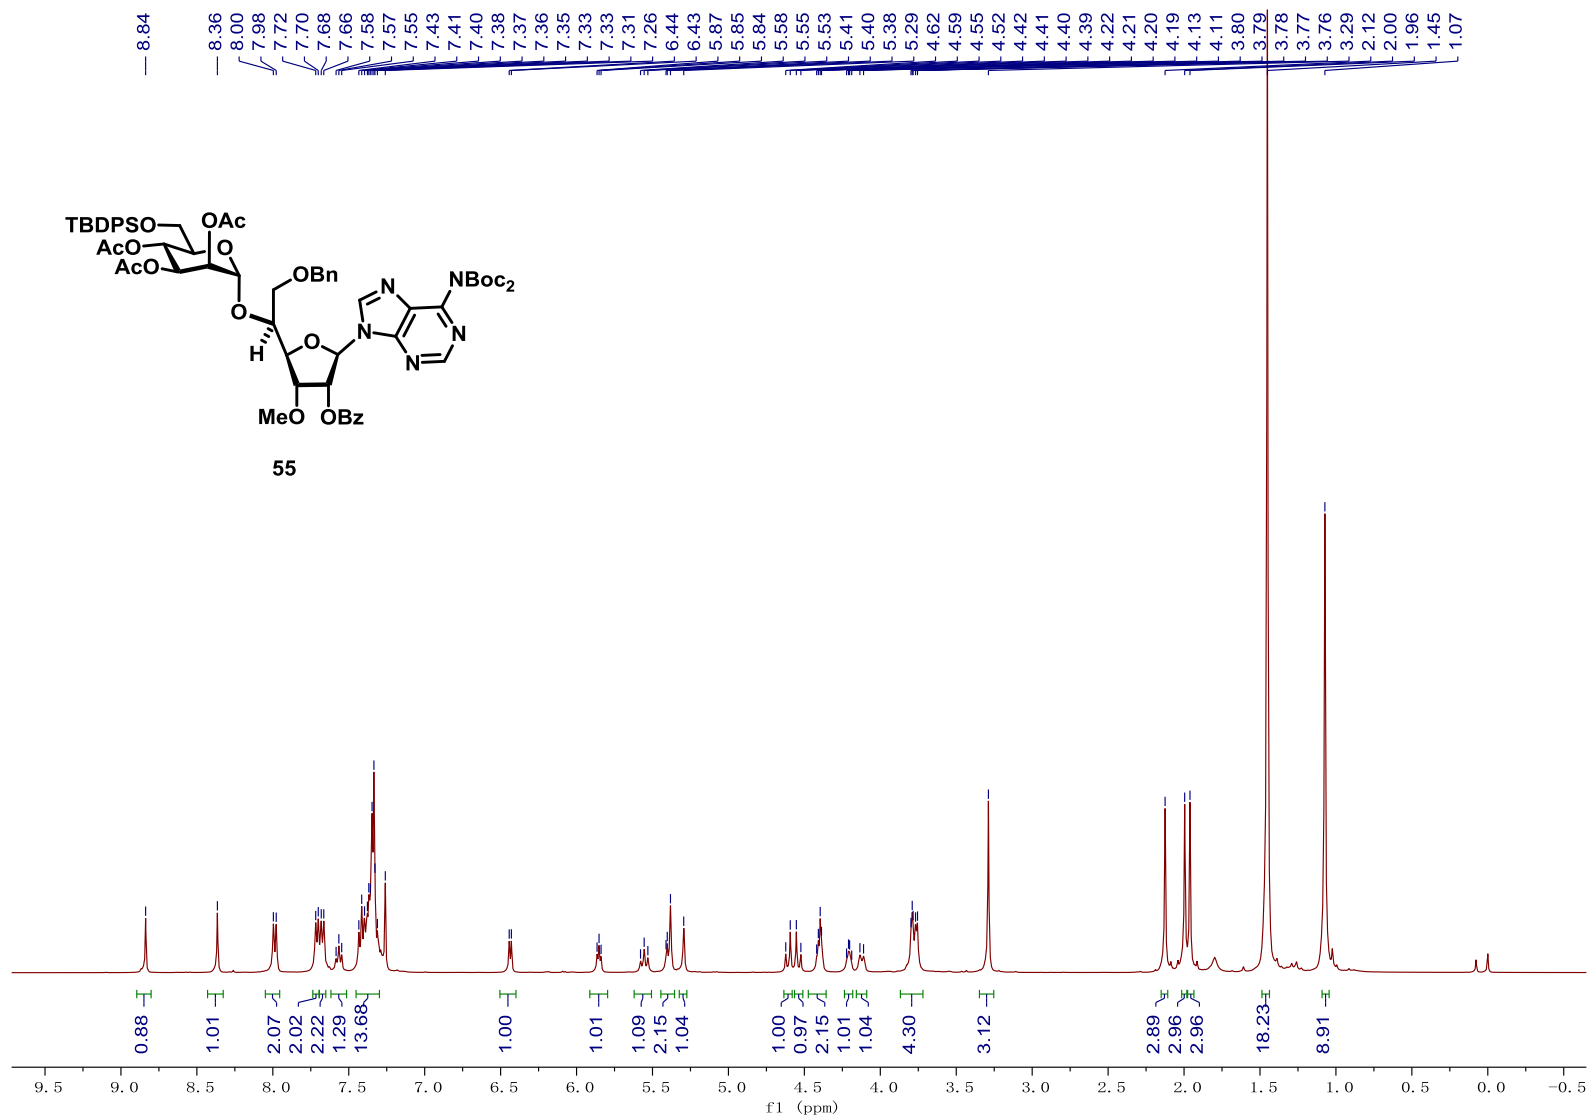

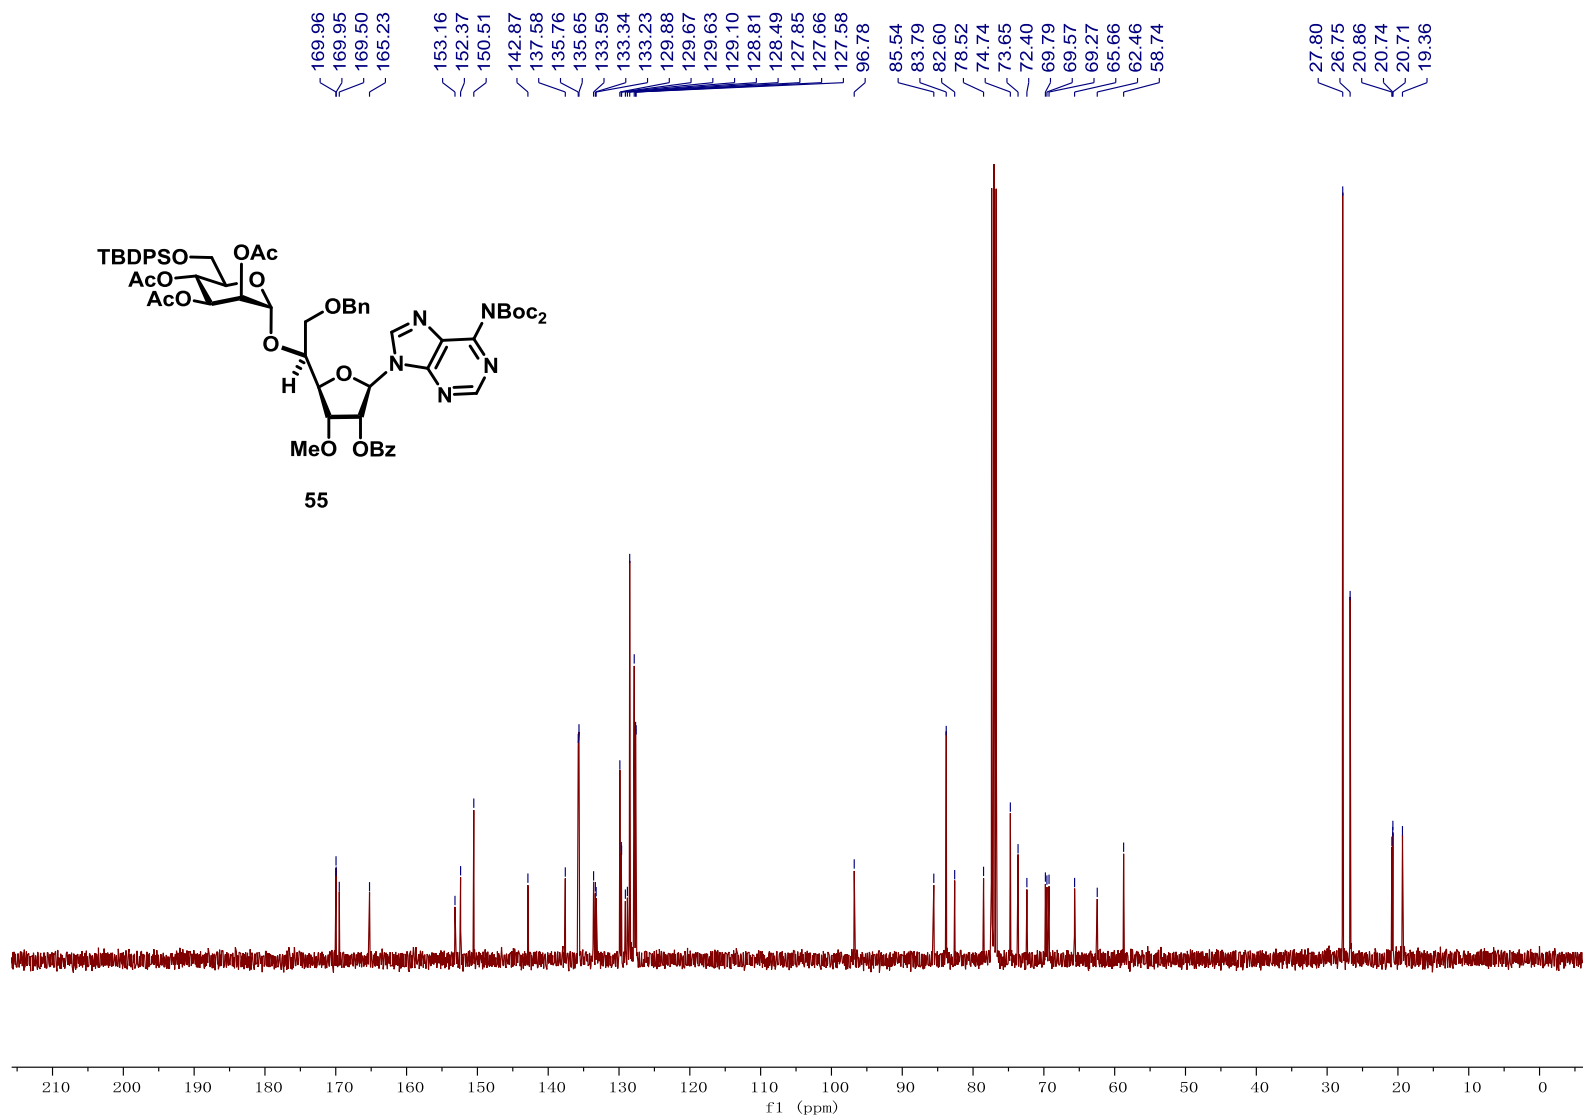

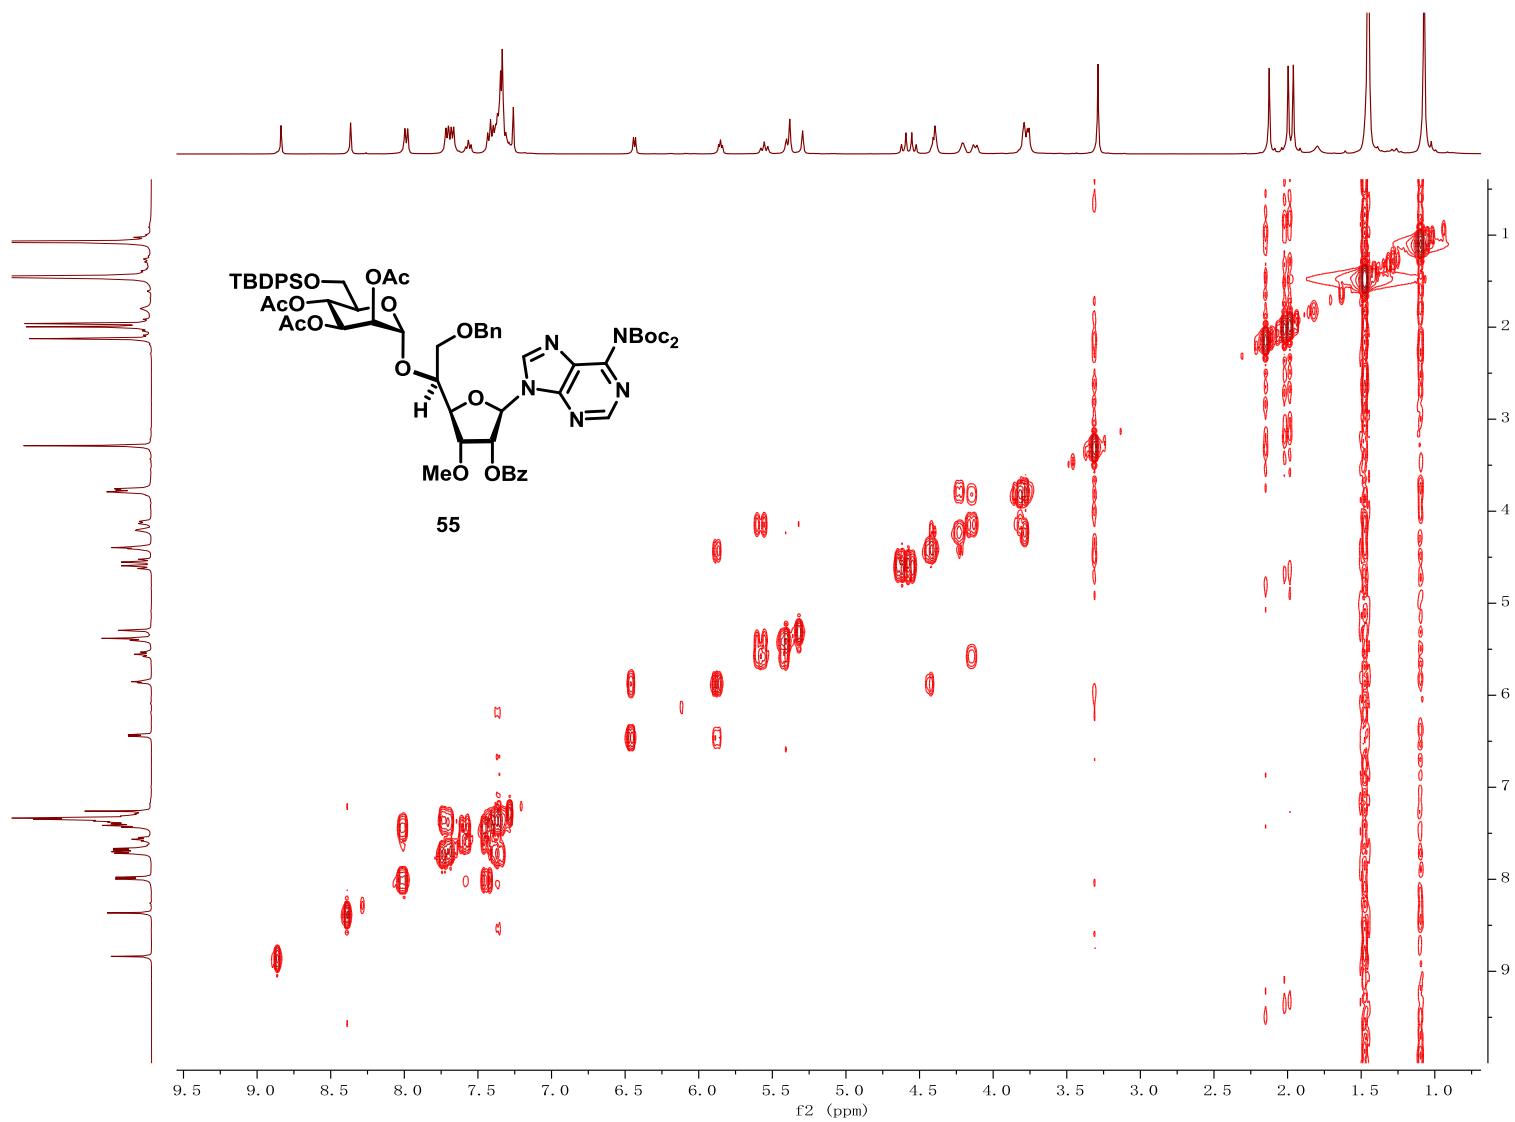

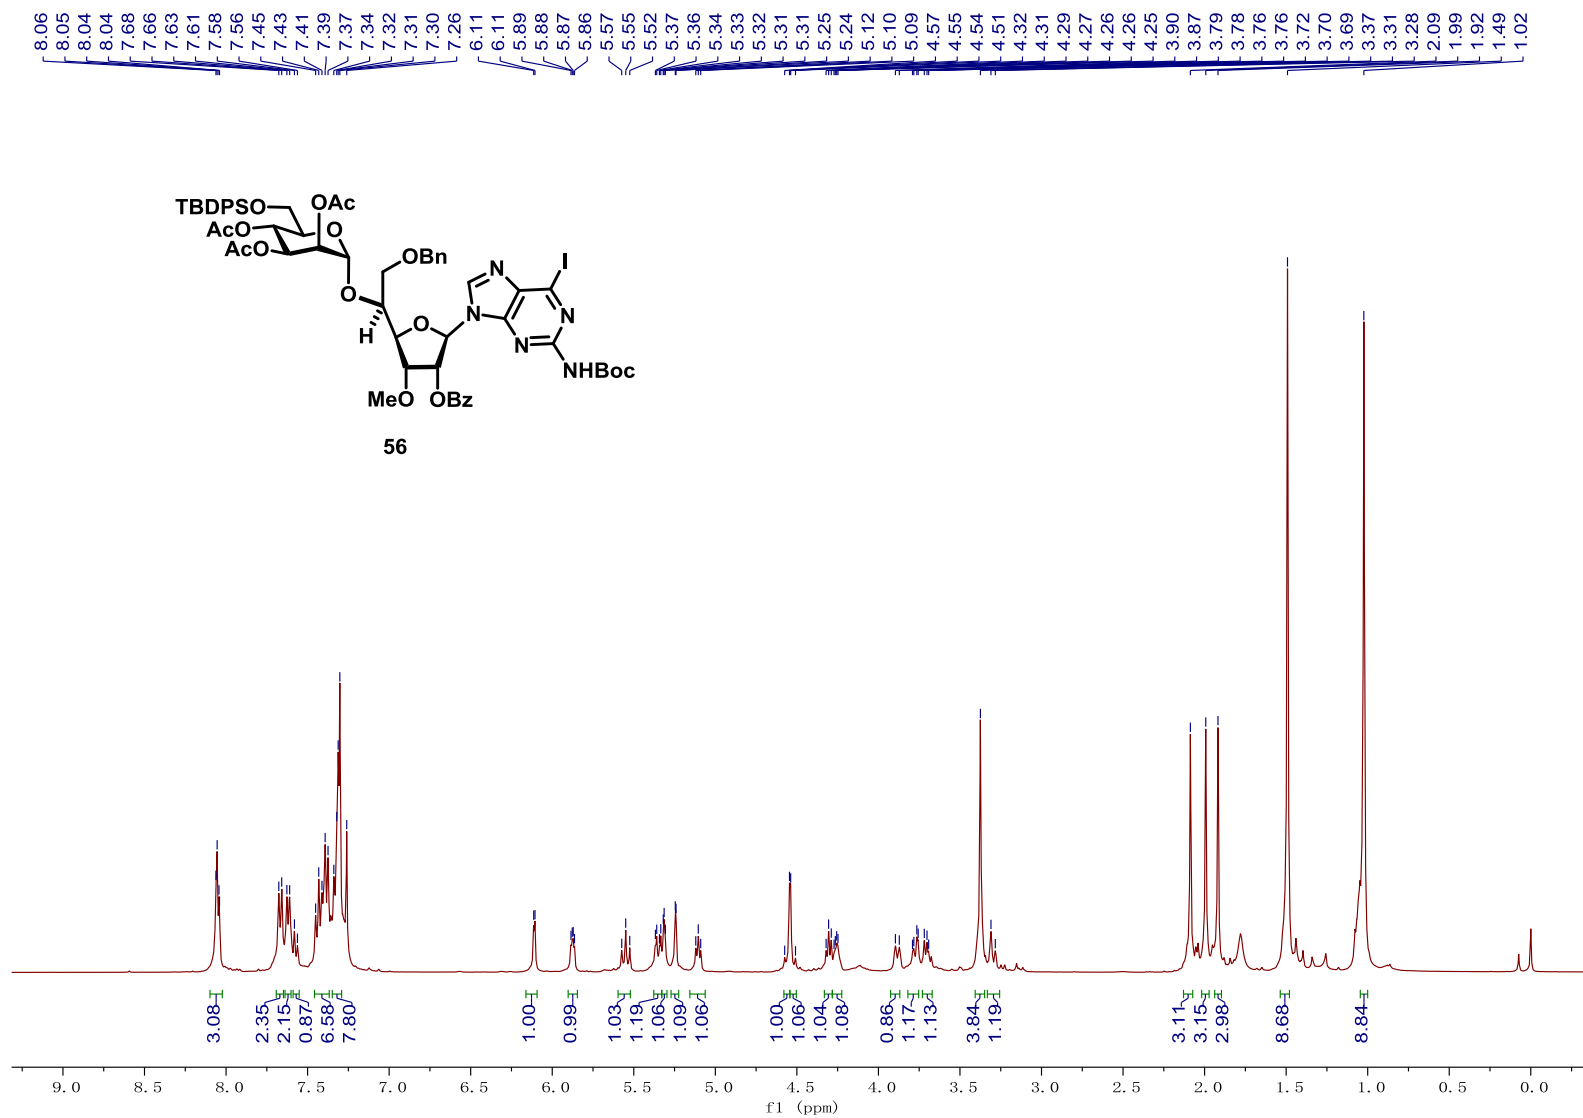

S161

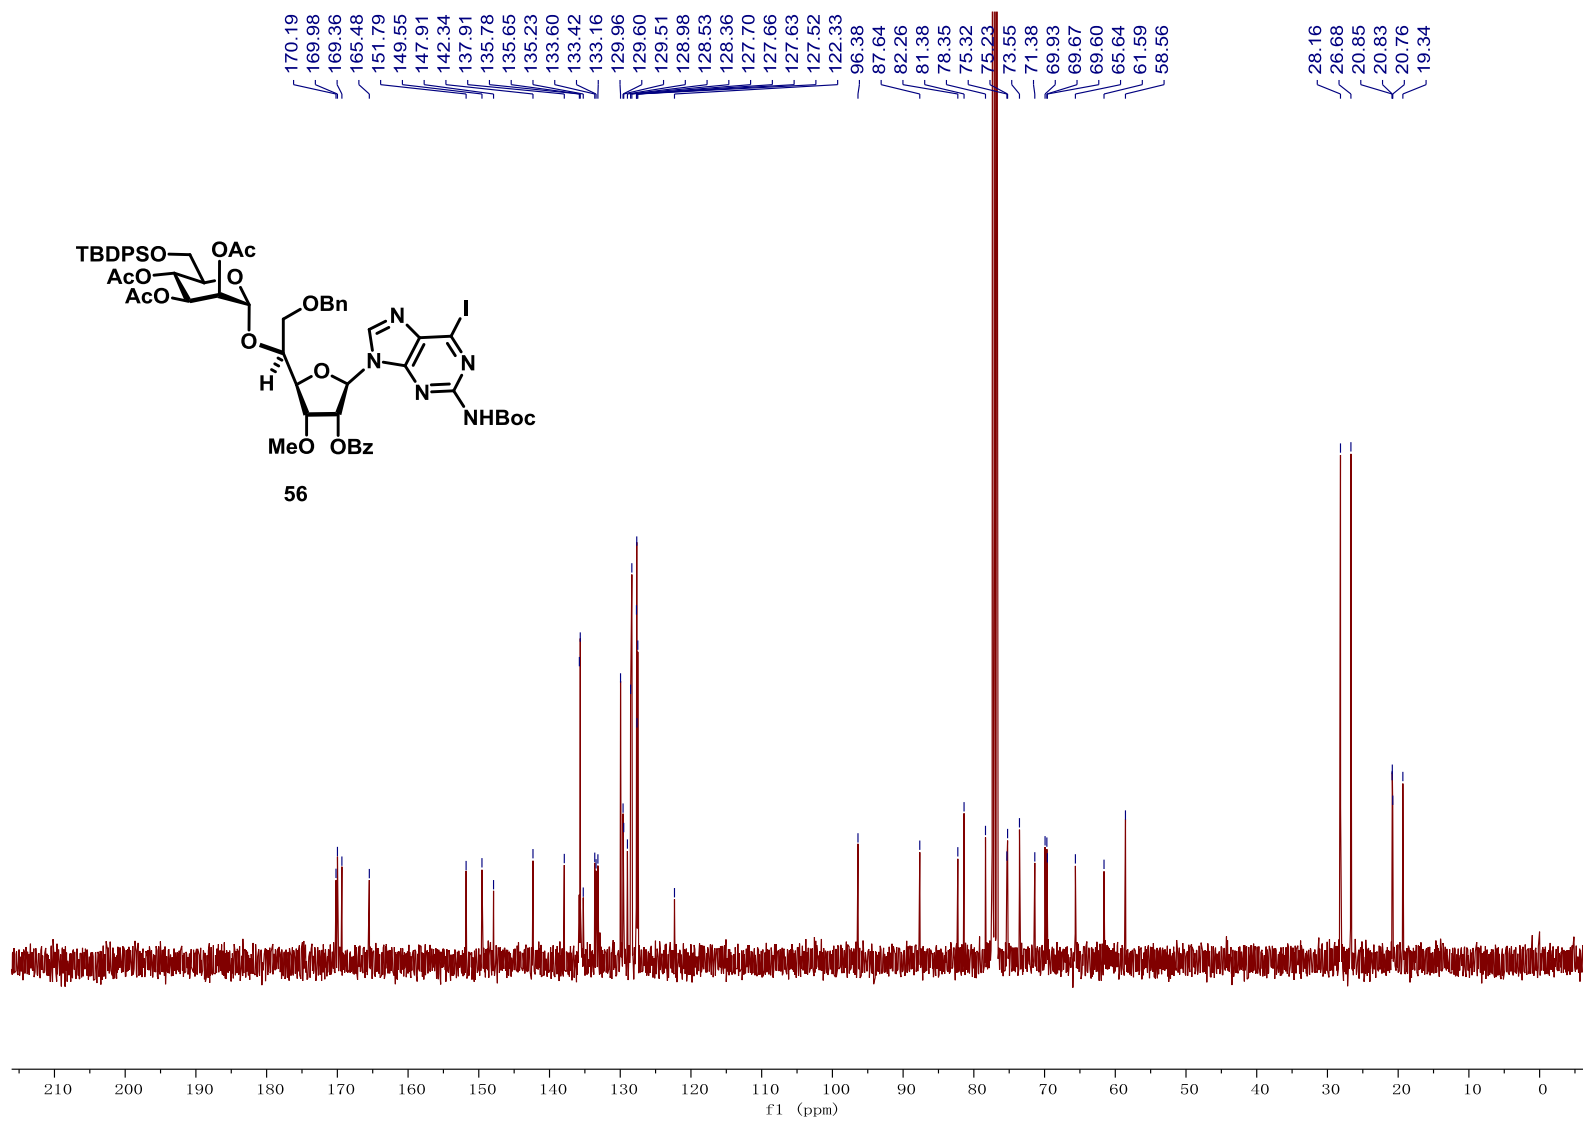

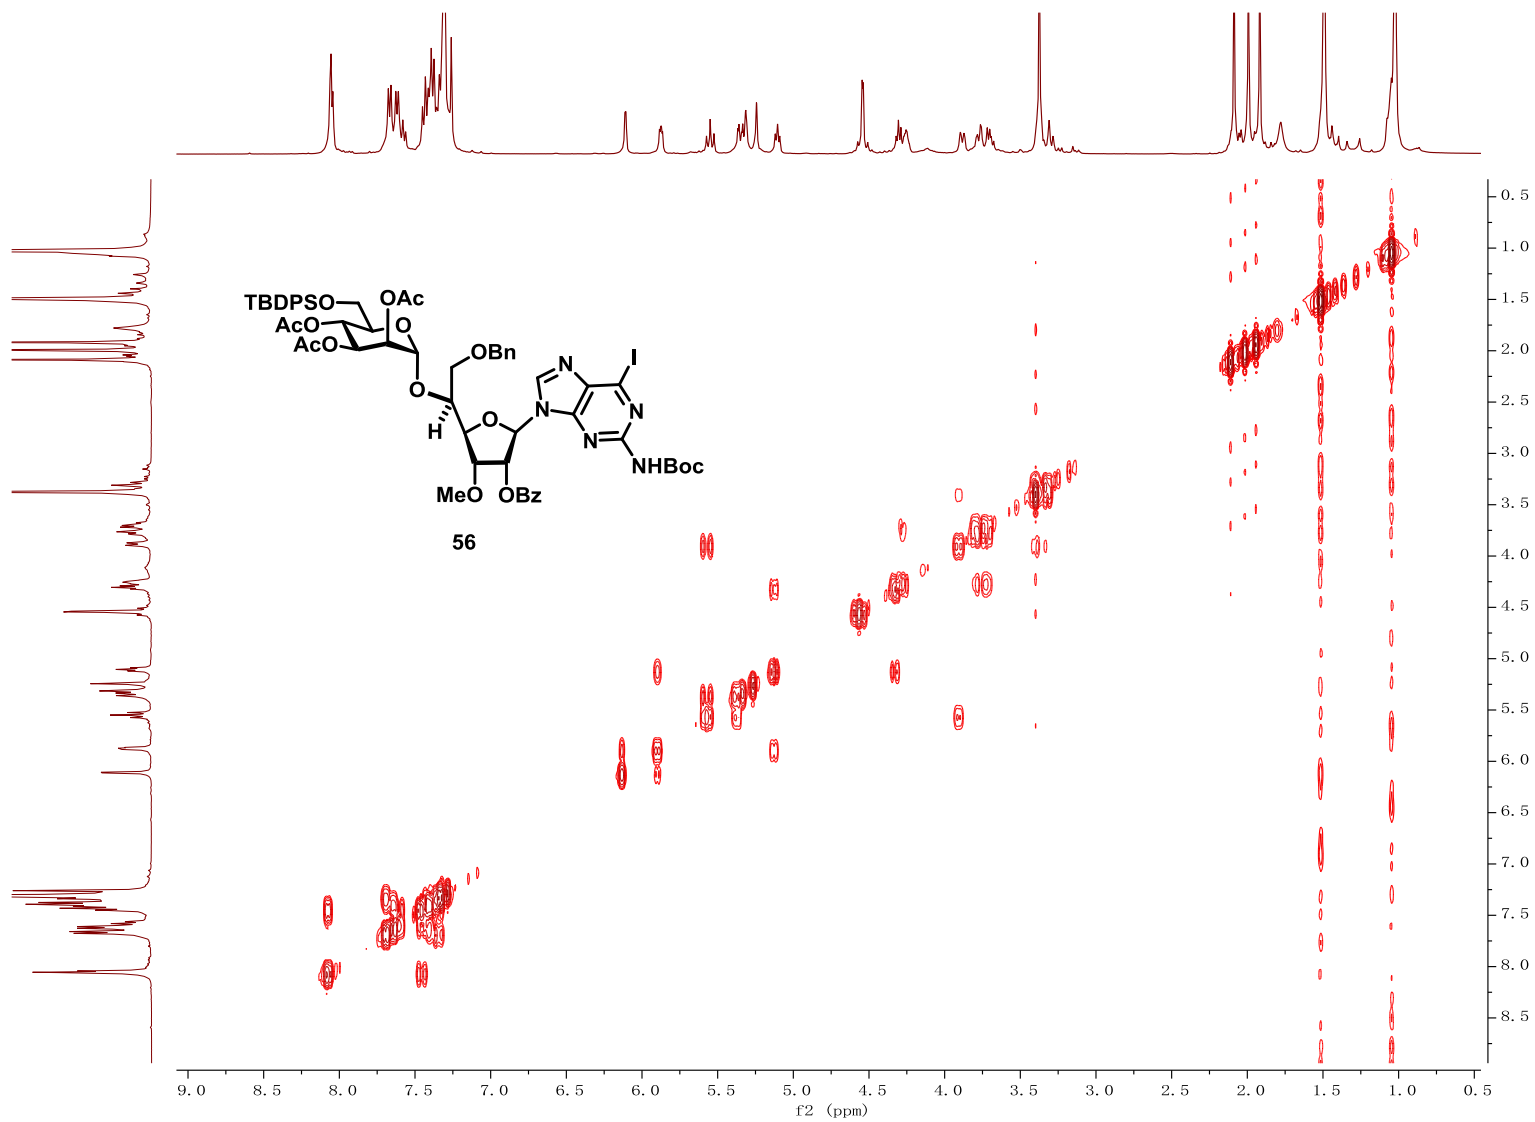

S163

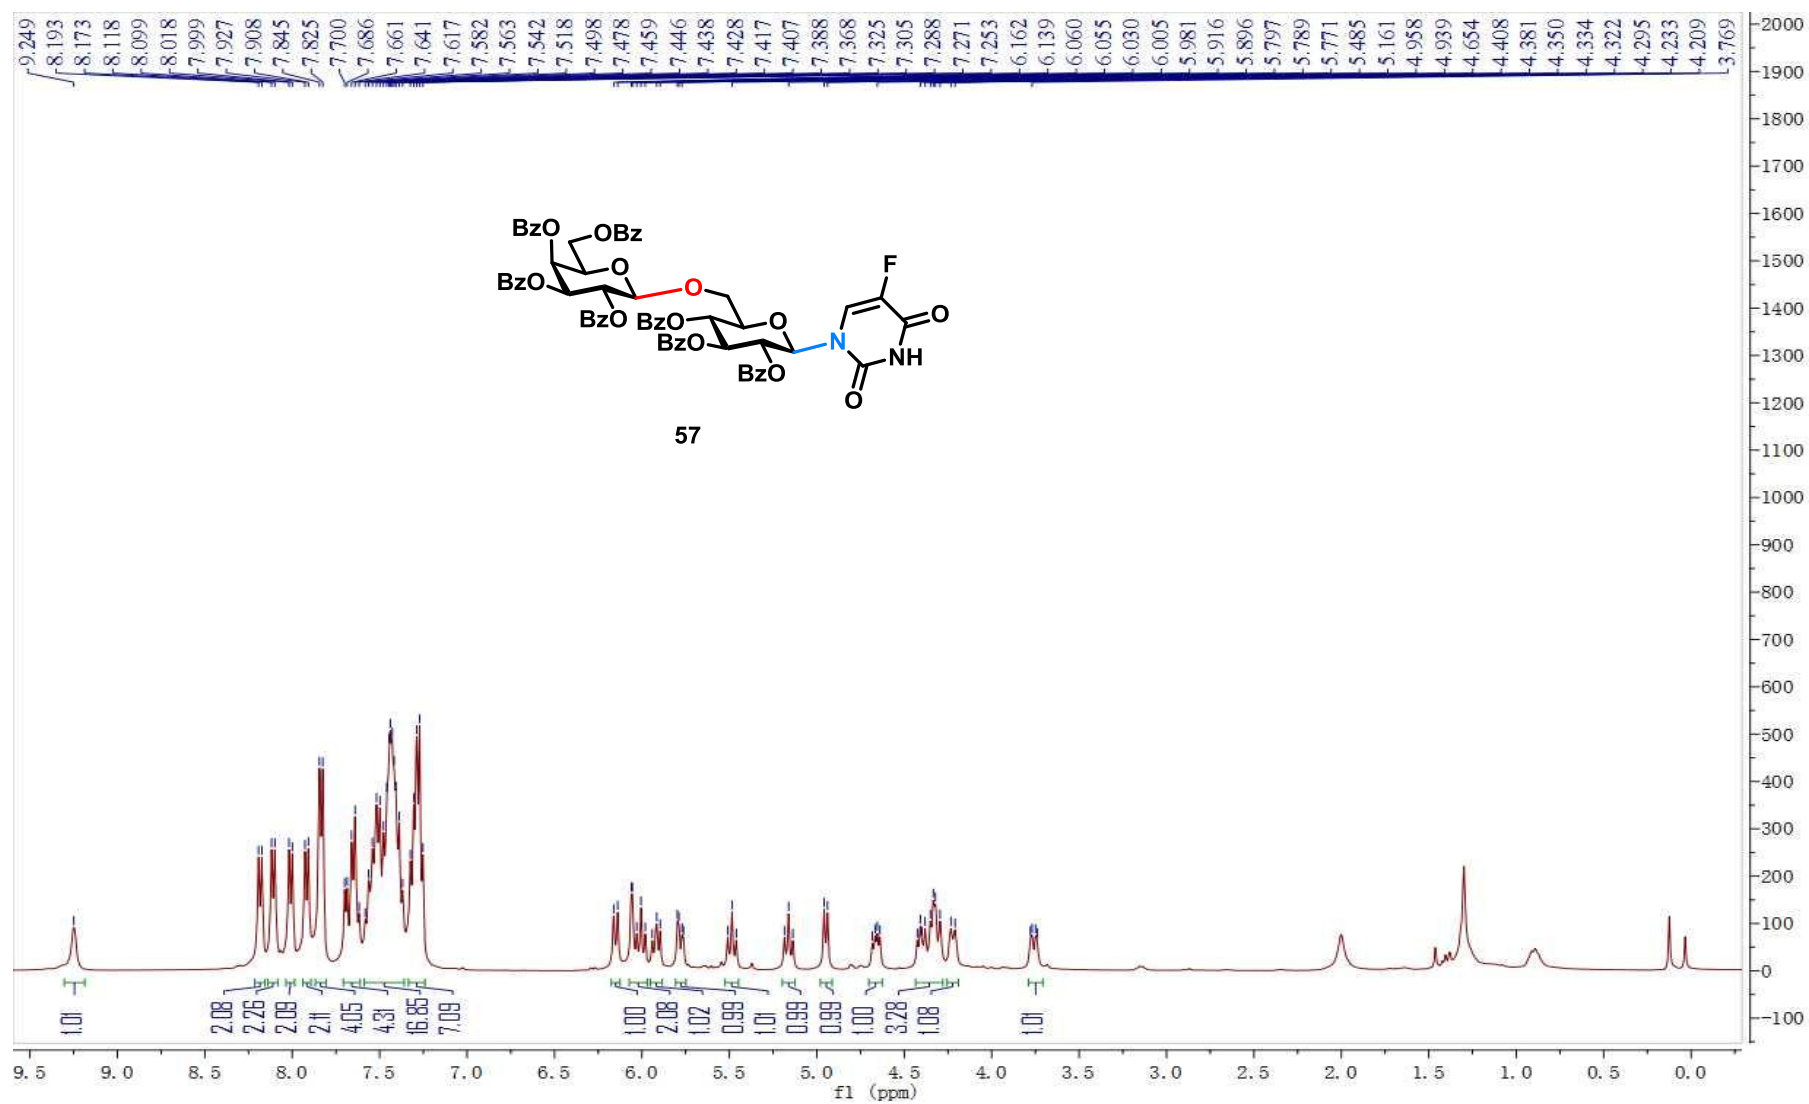



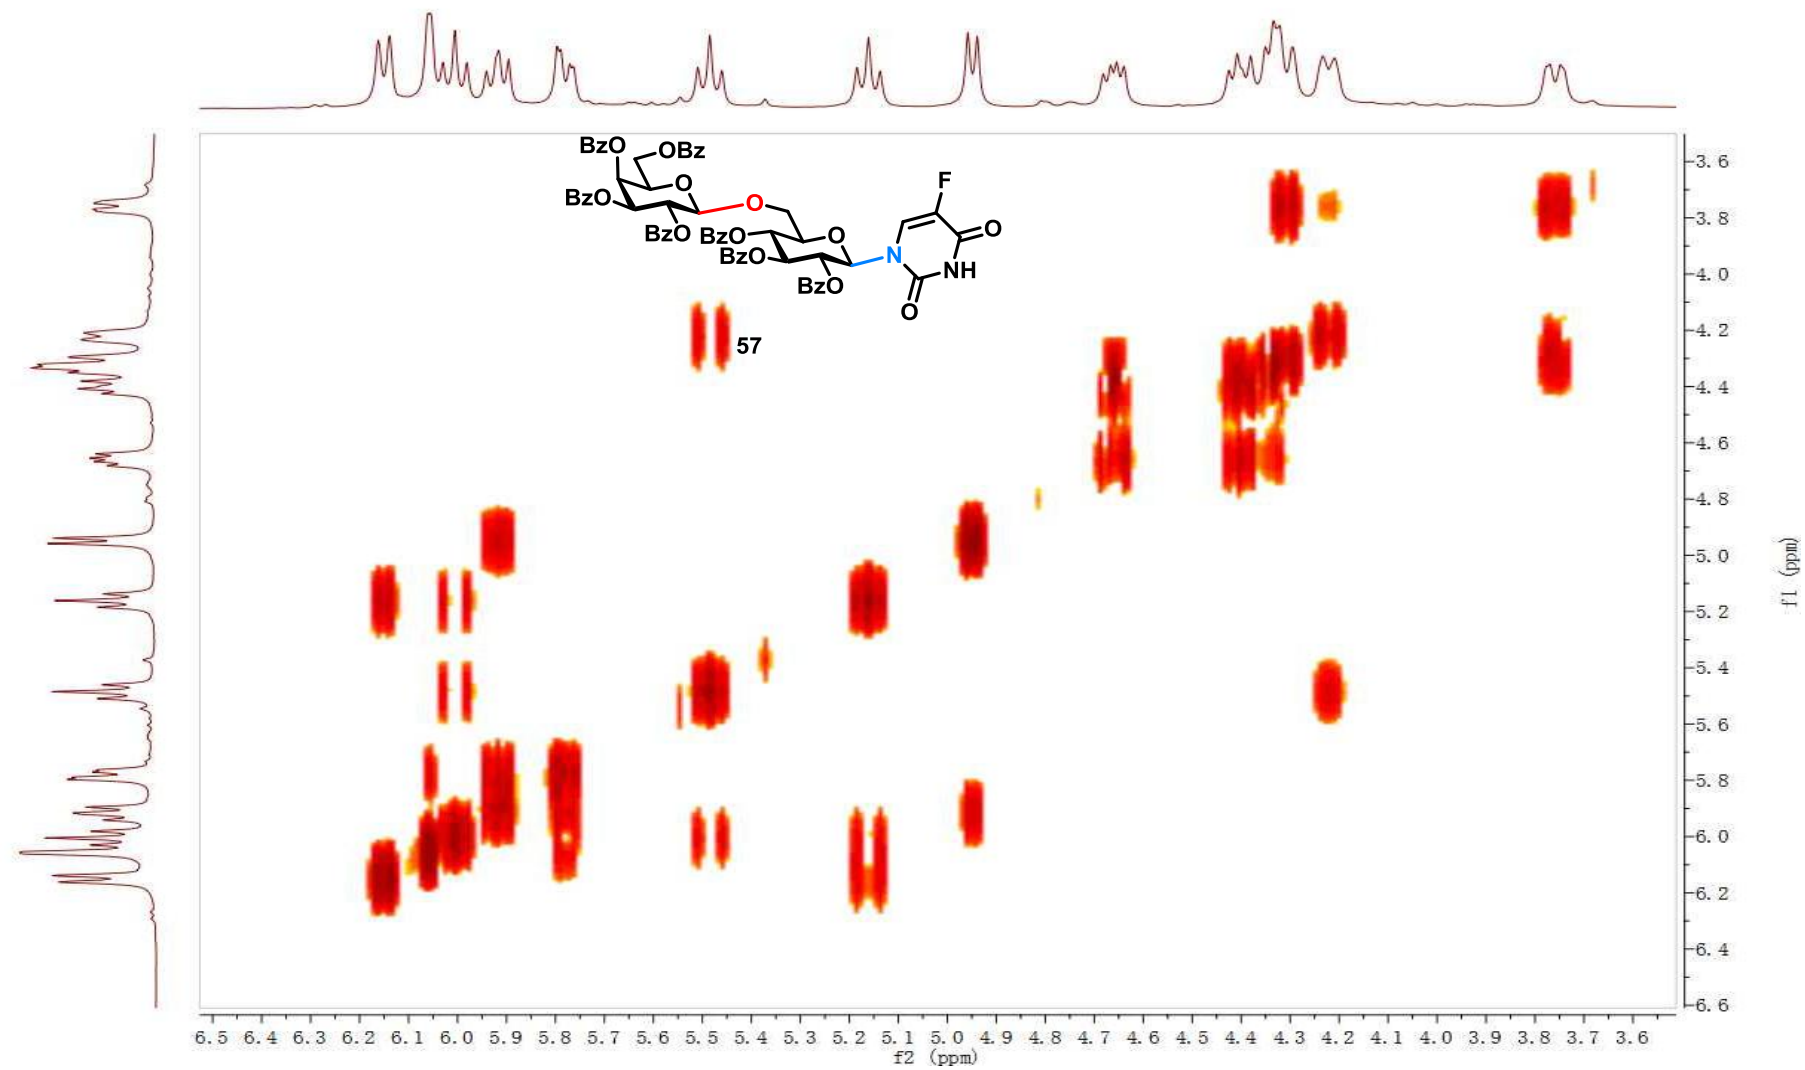

S165

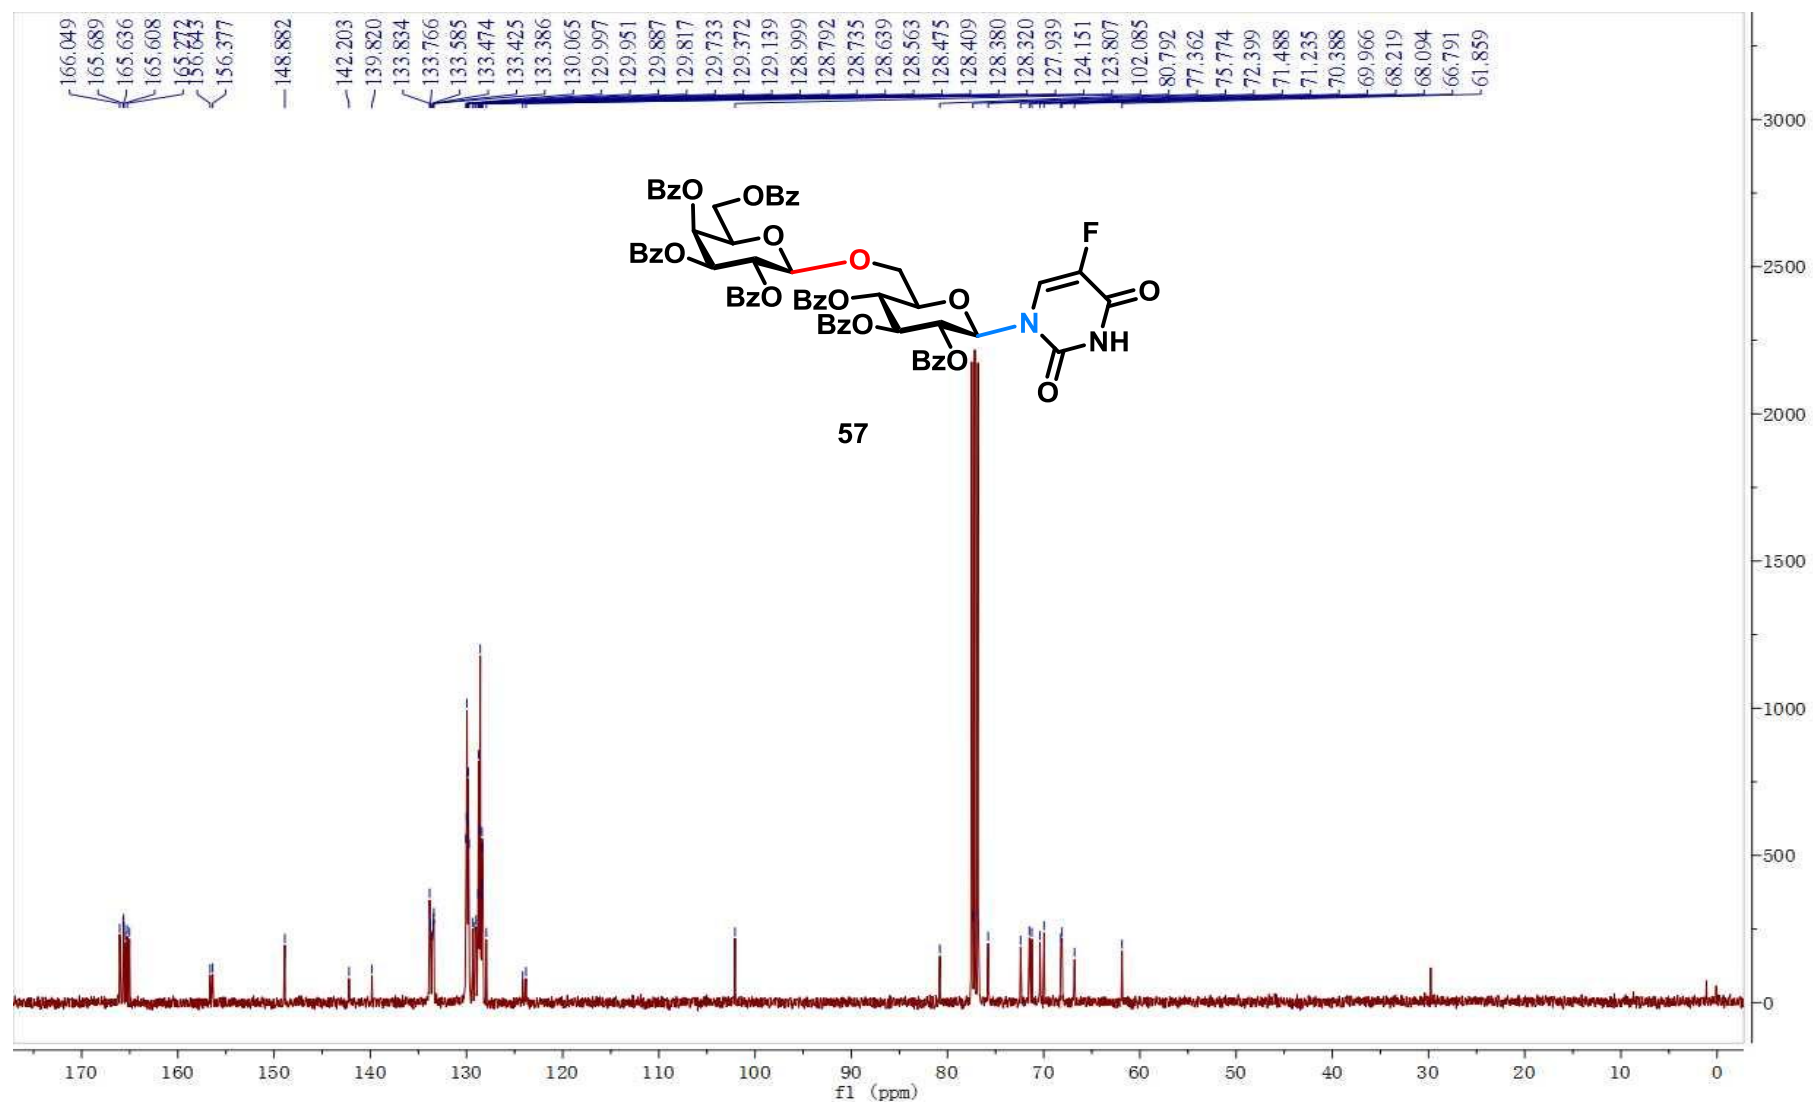

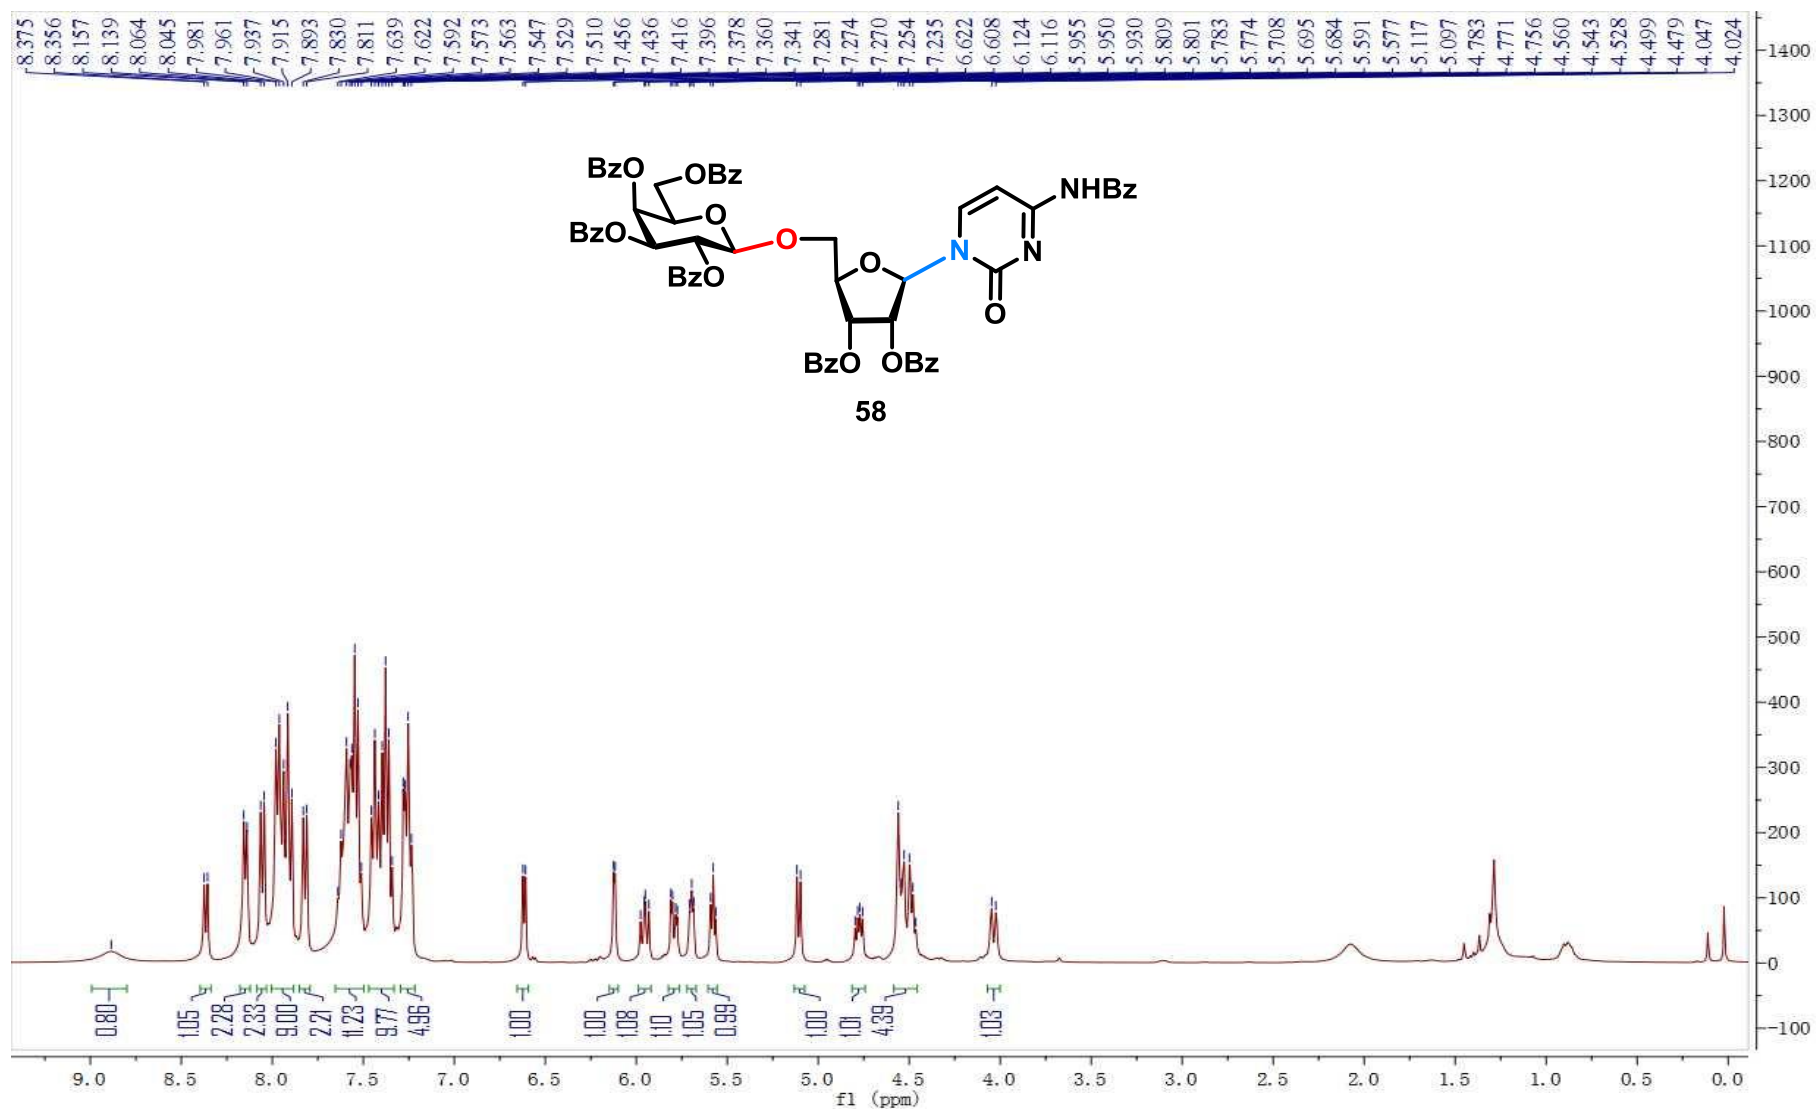

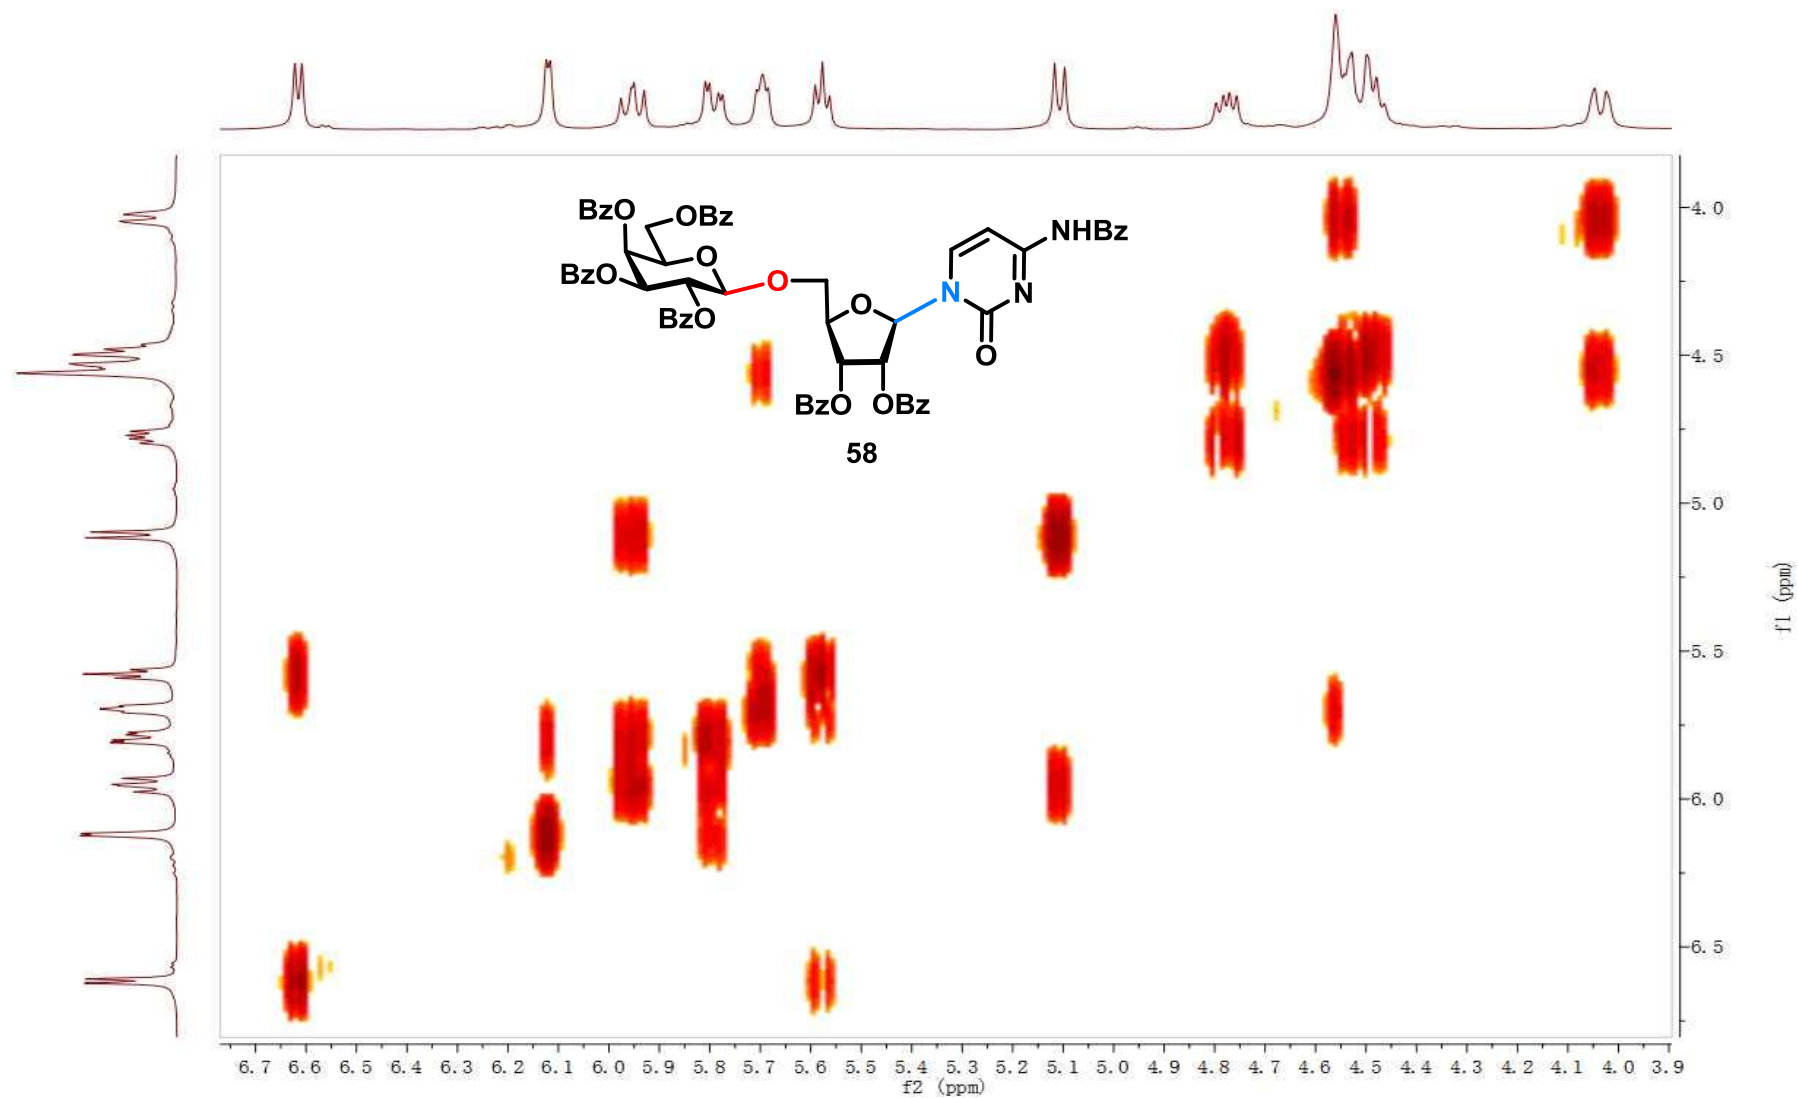

S168

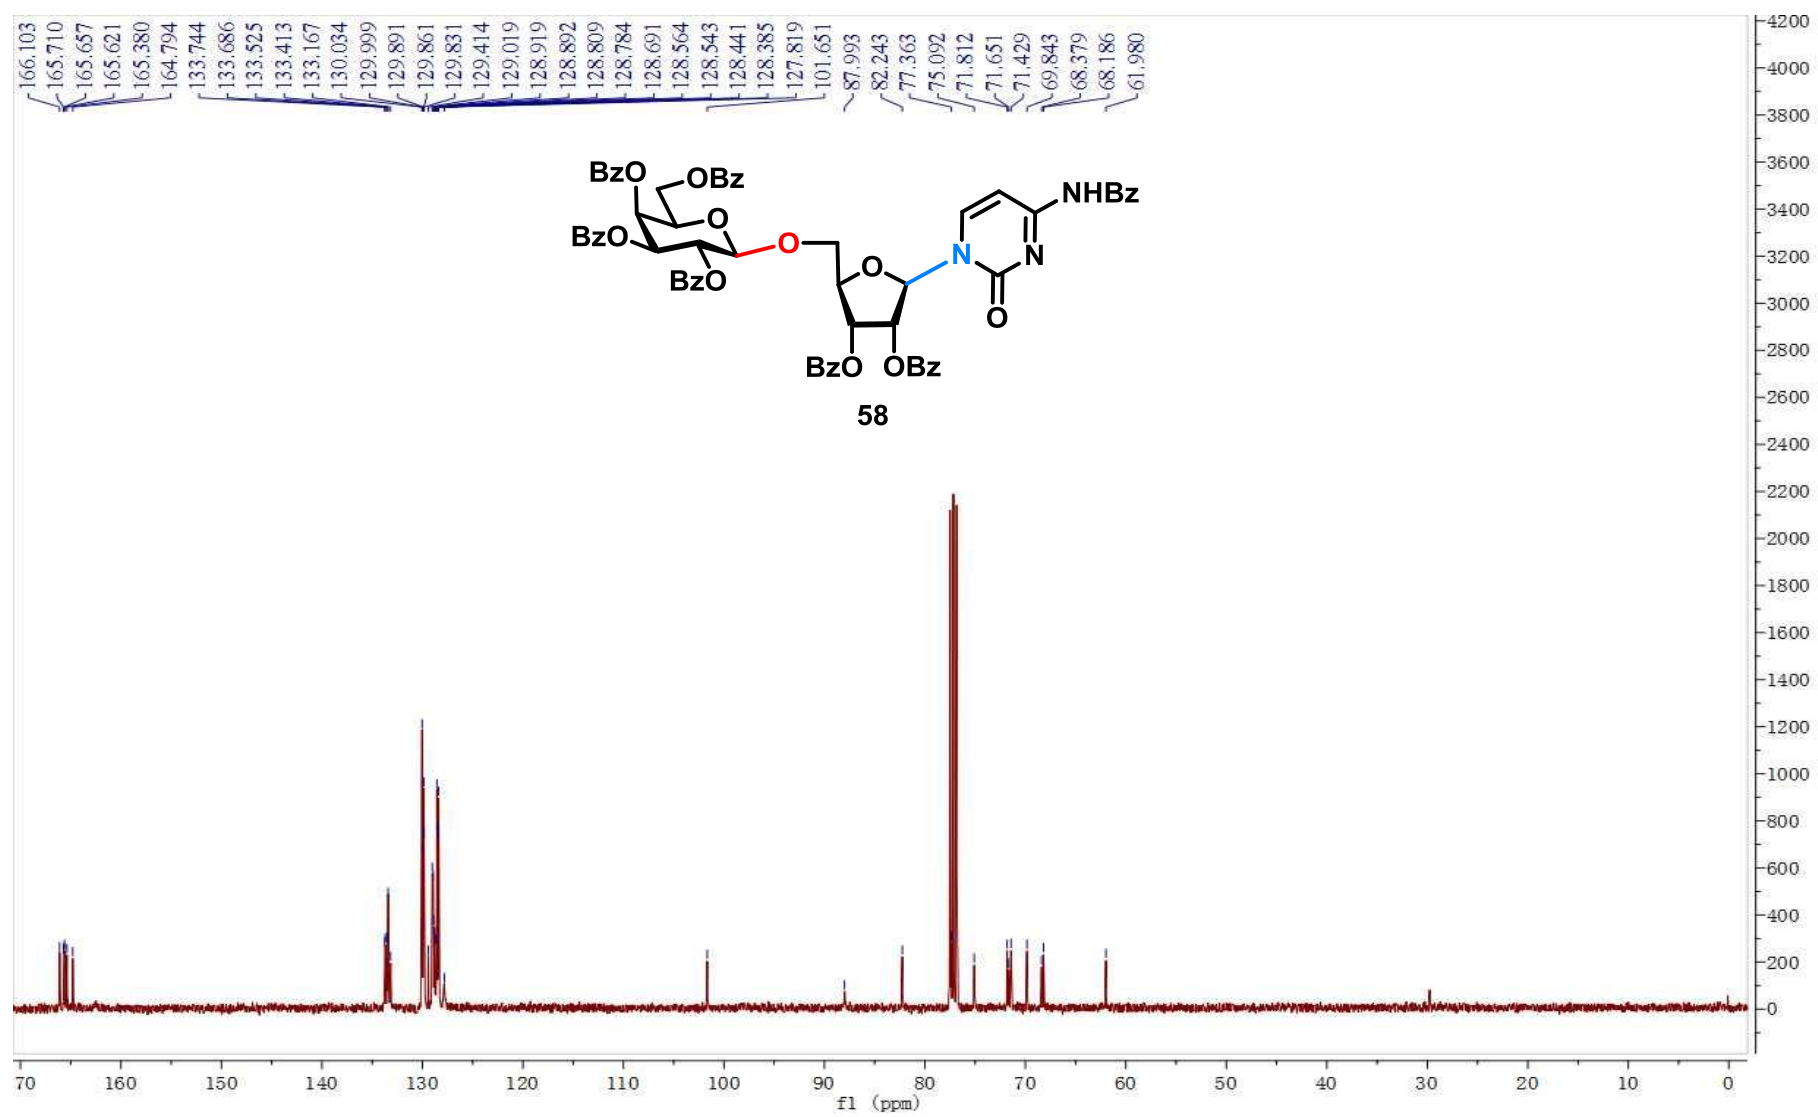

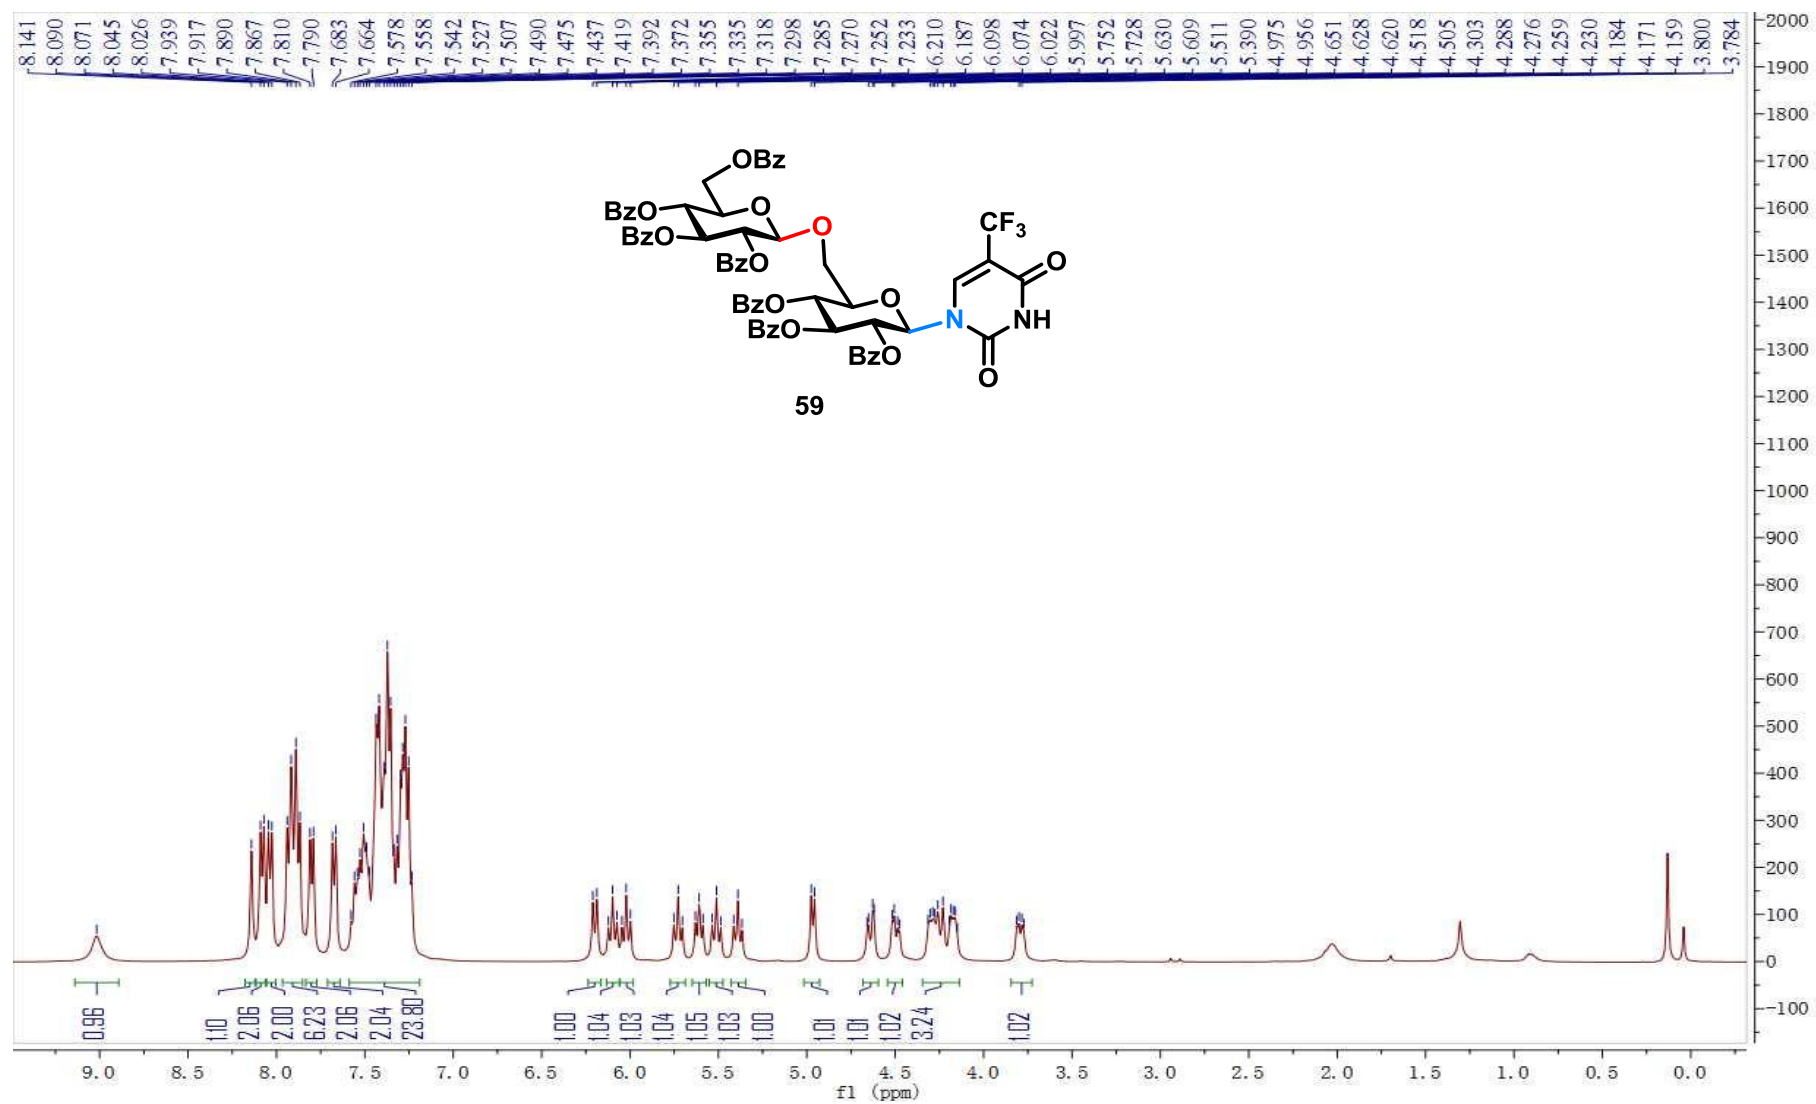

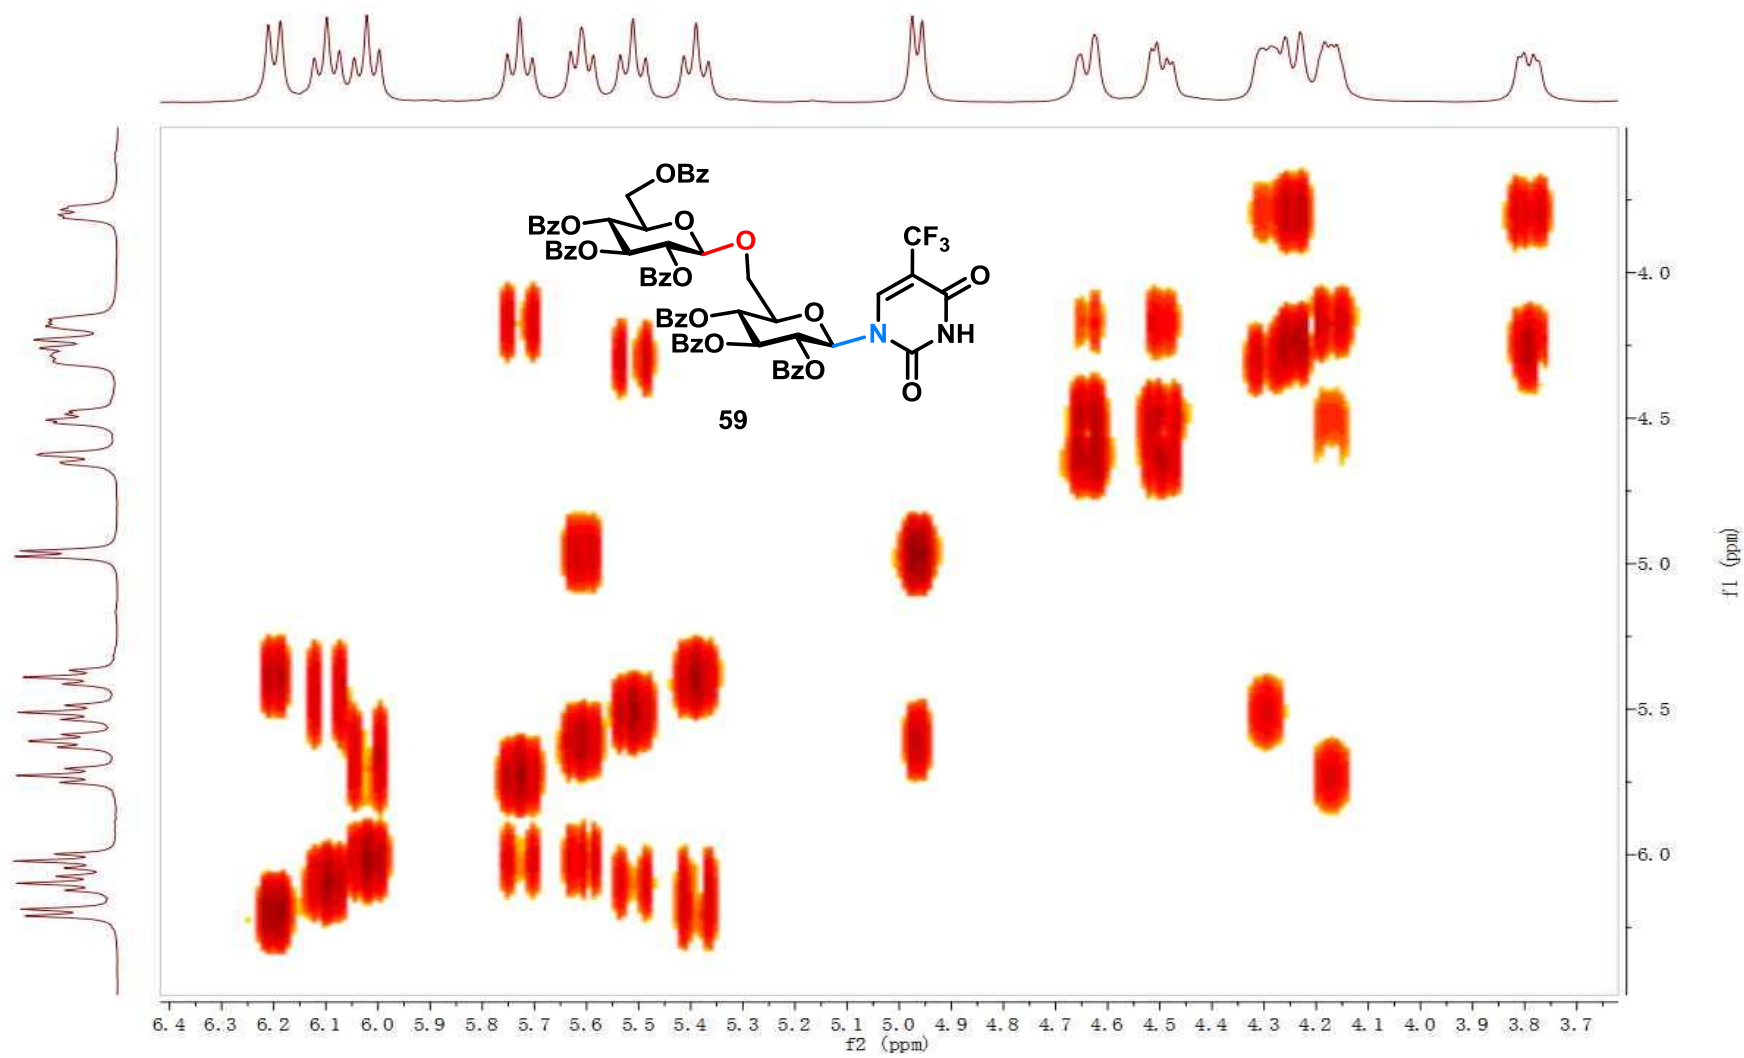



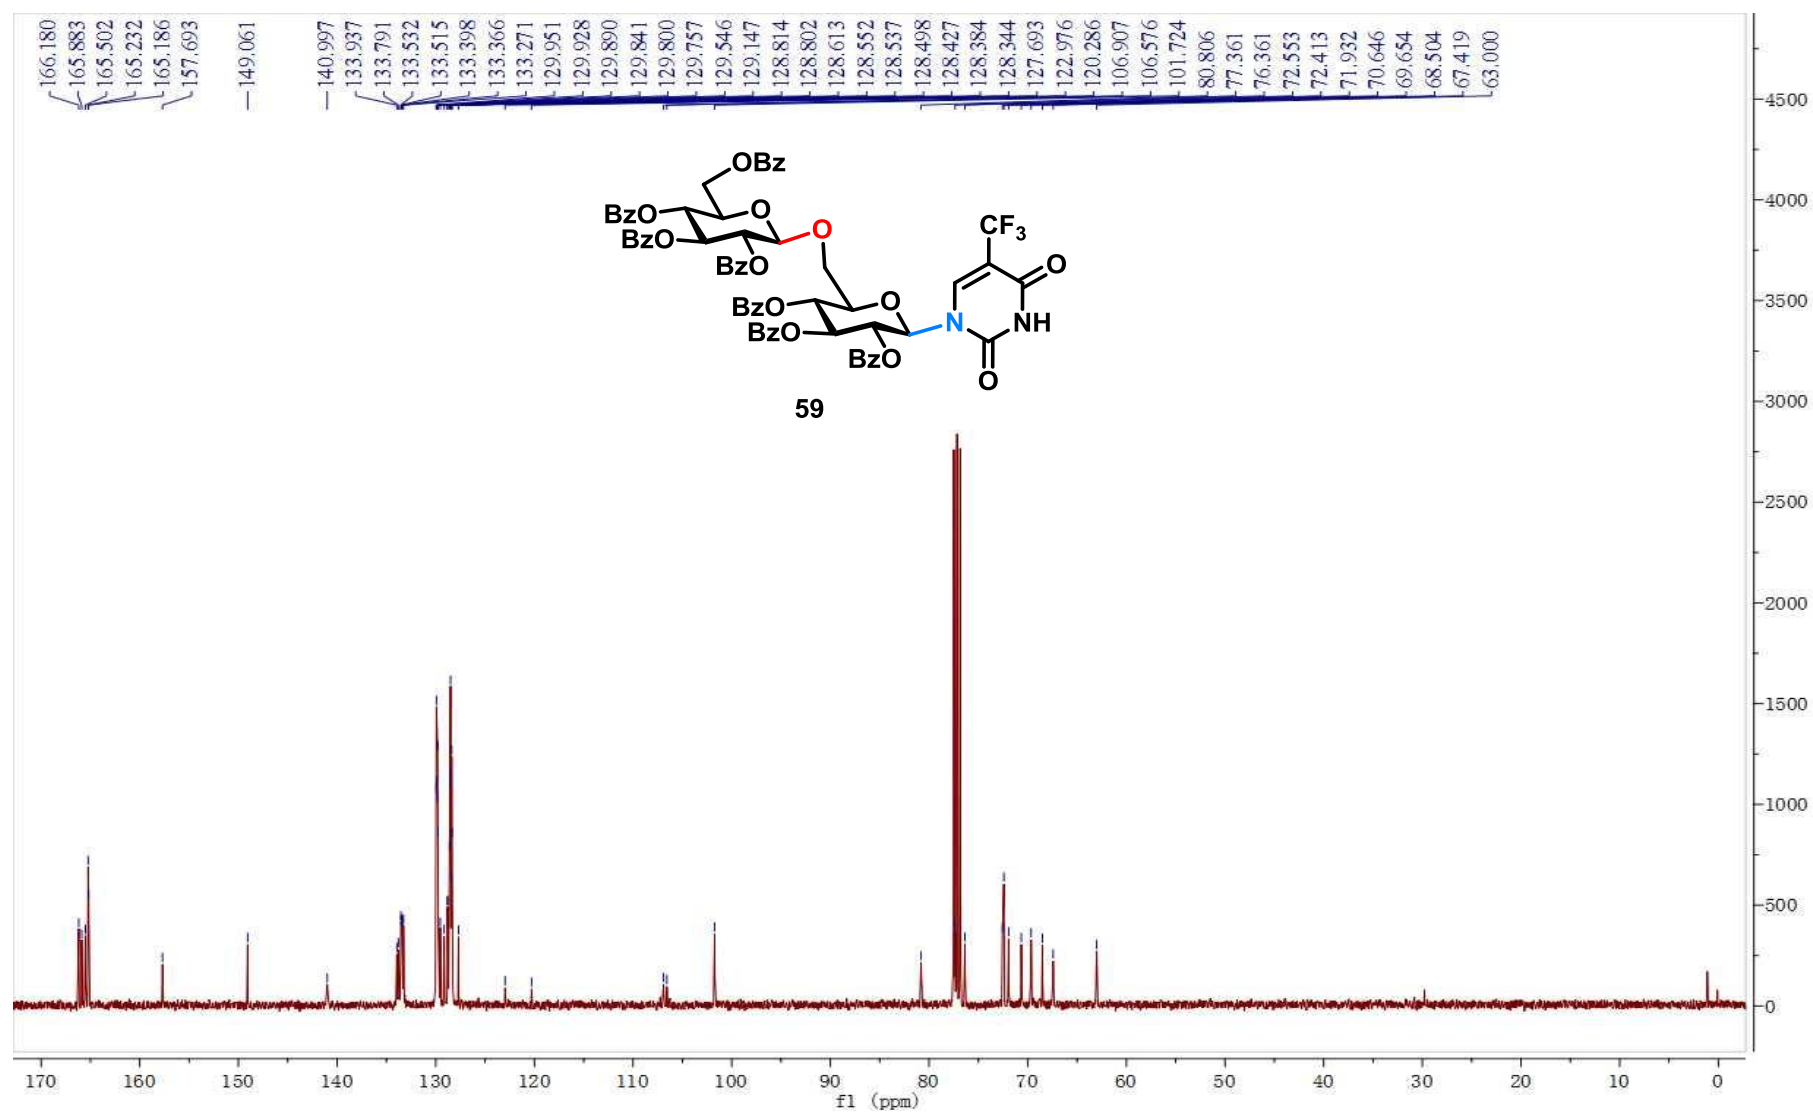



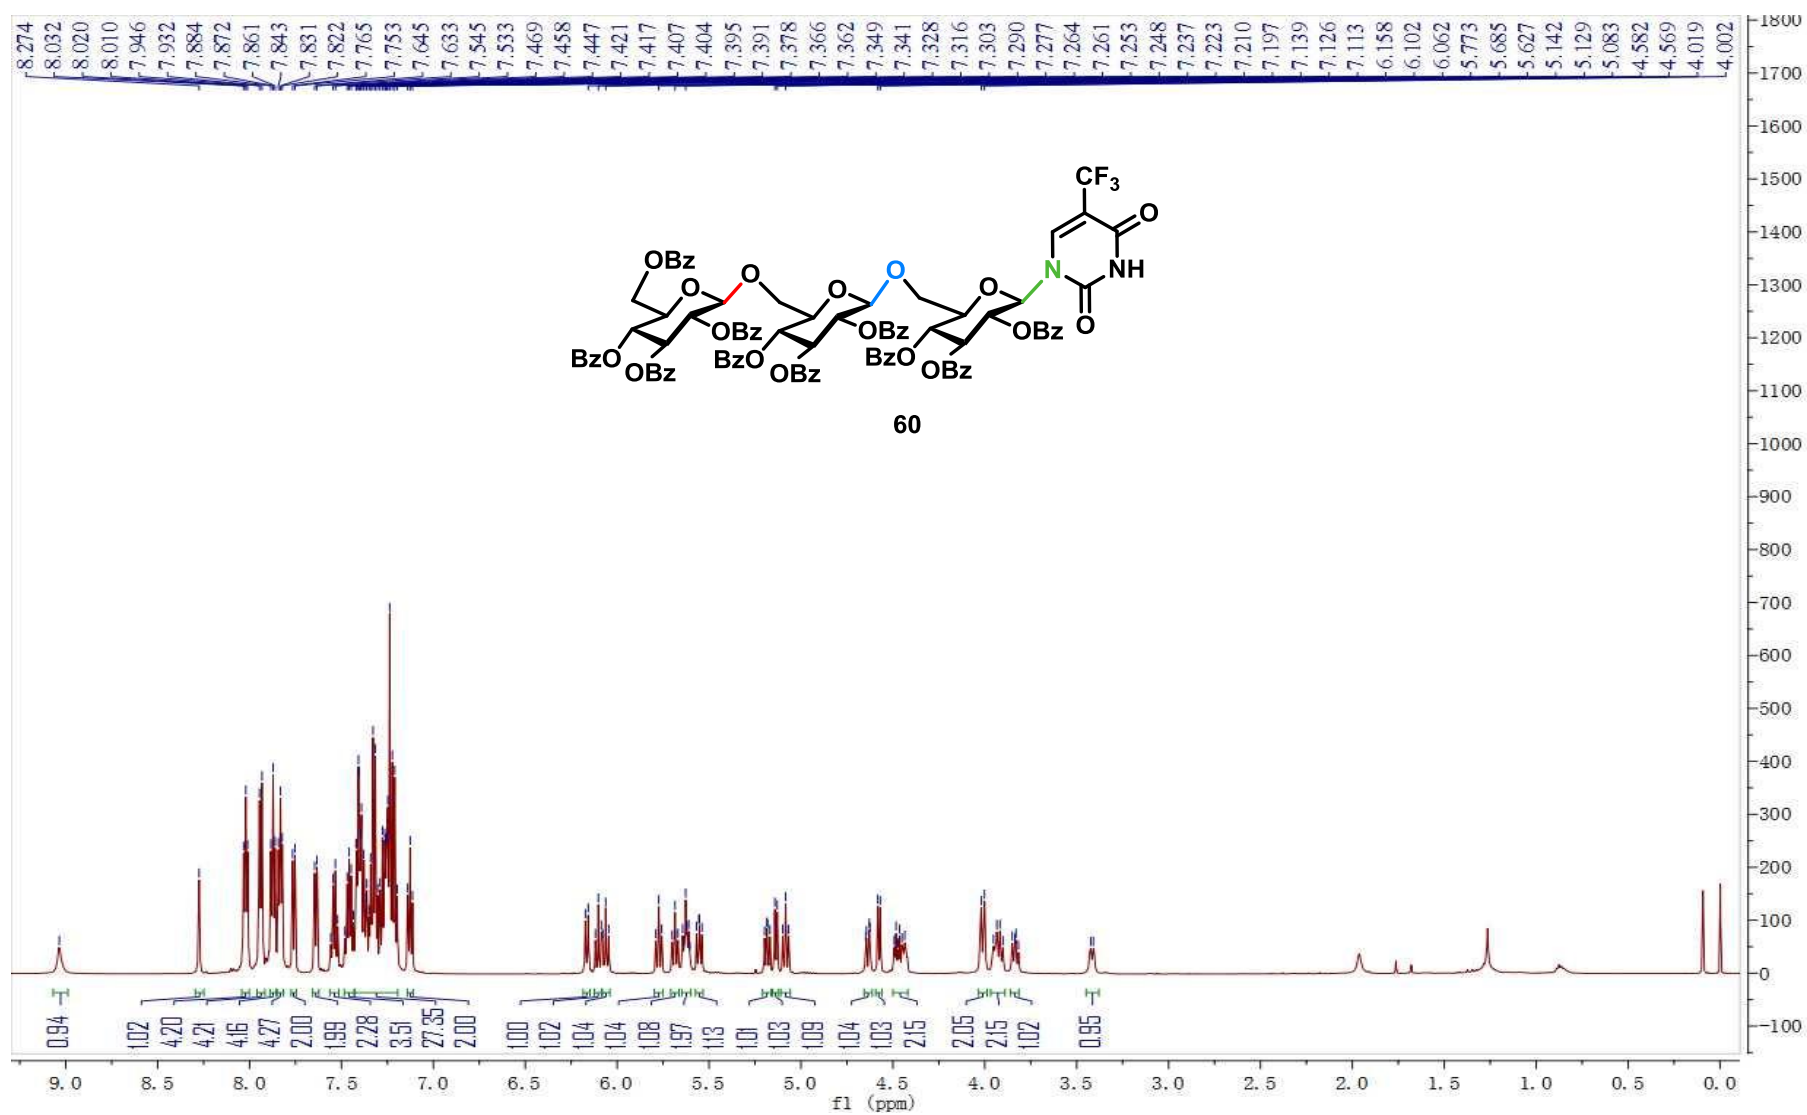



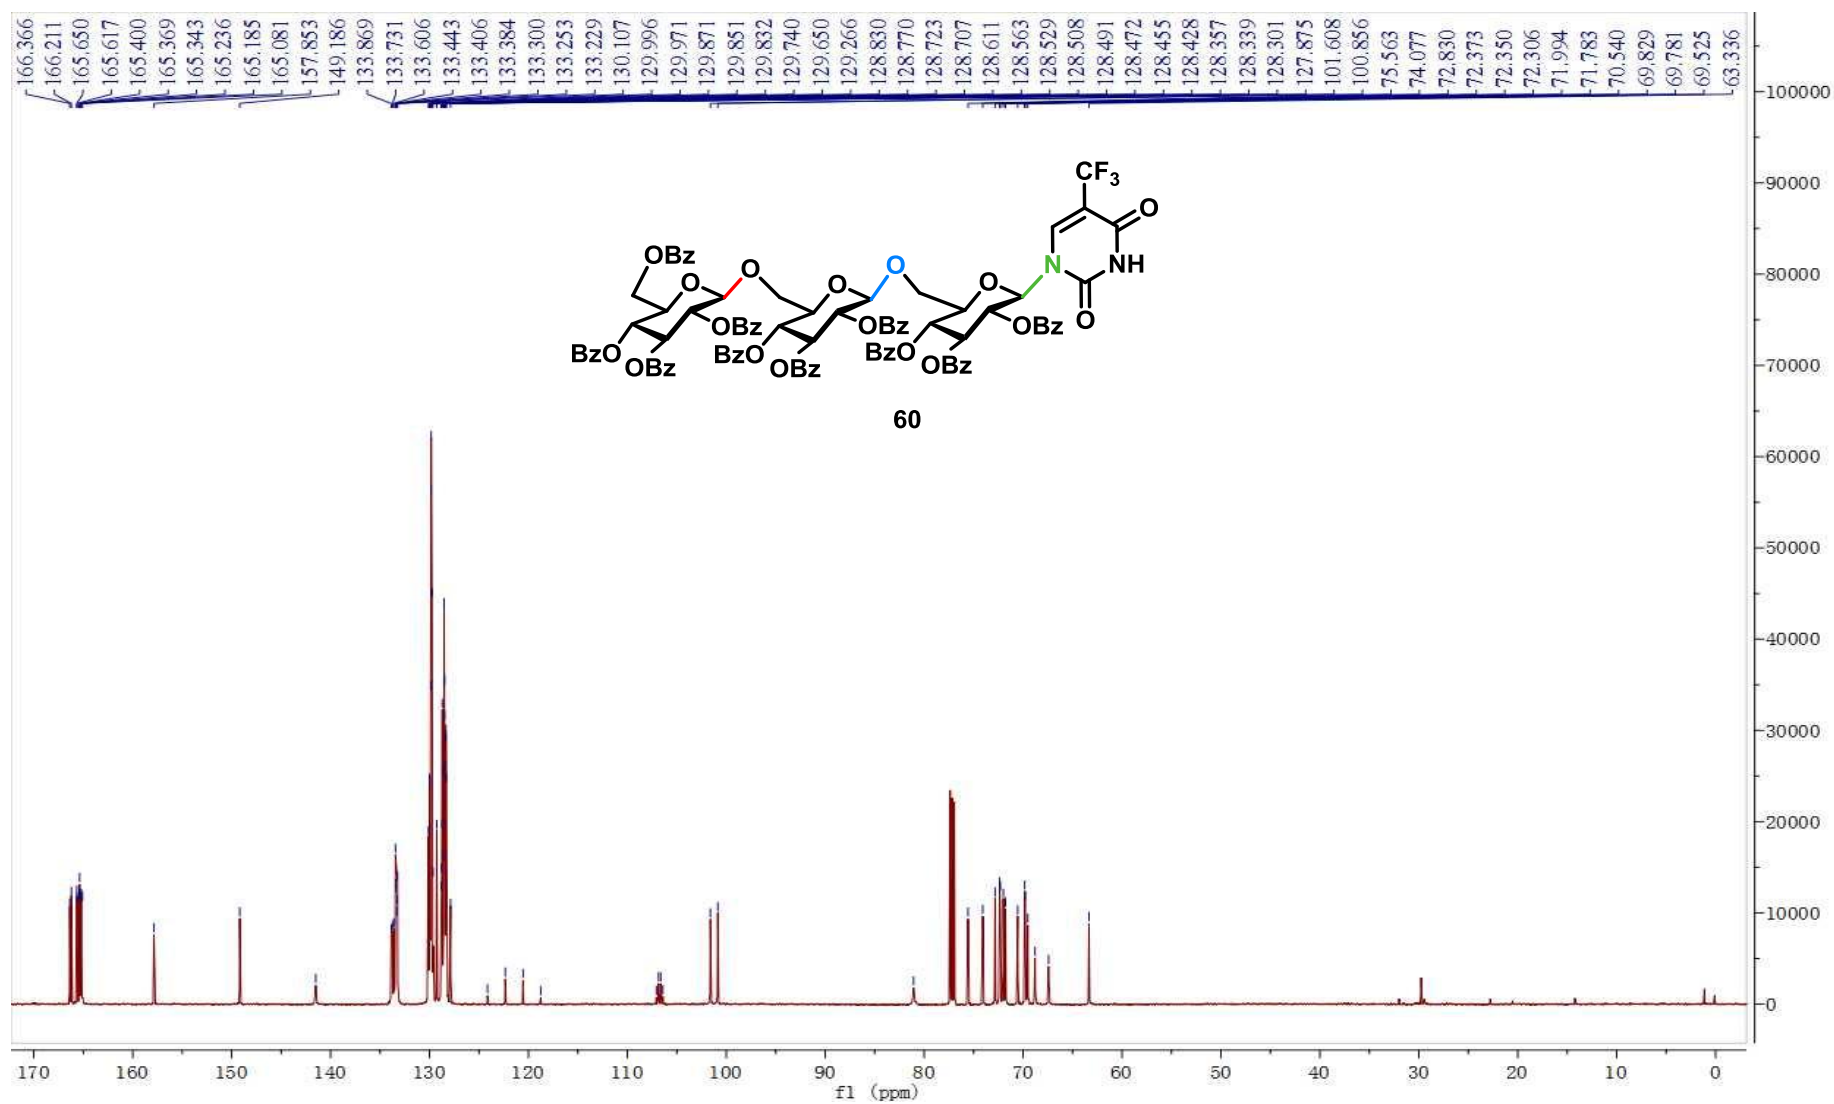

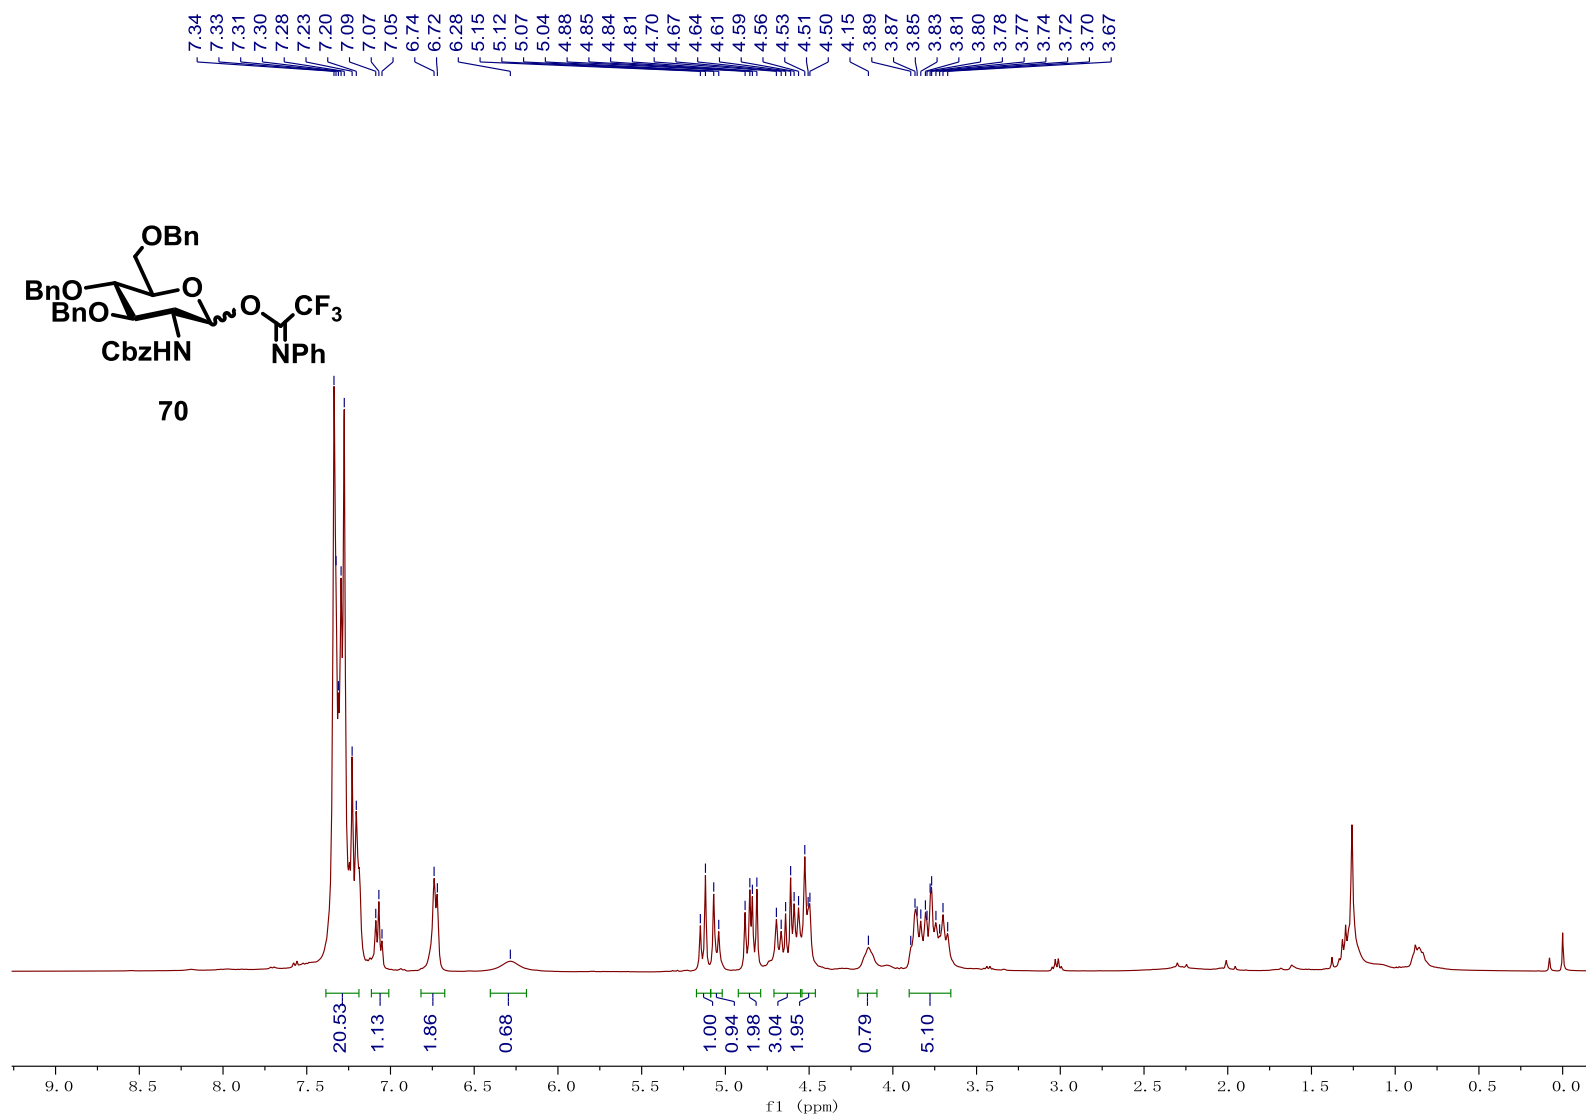

S176

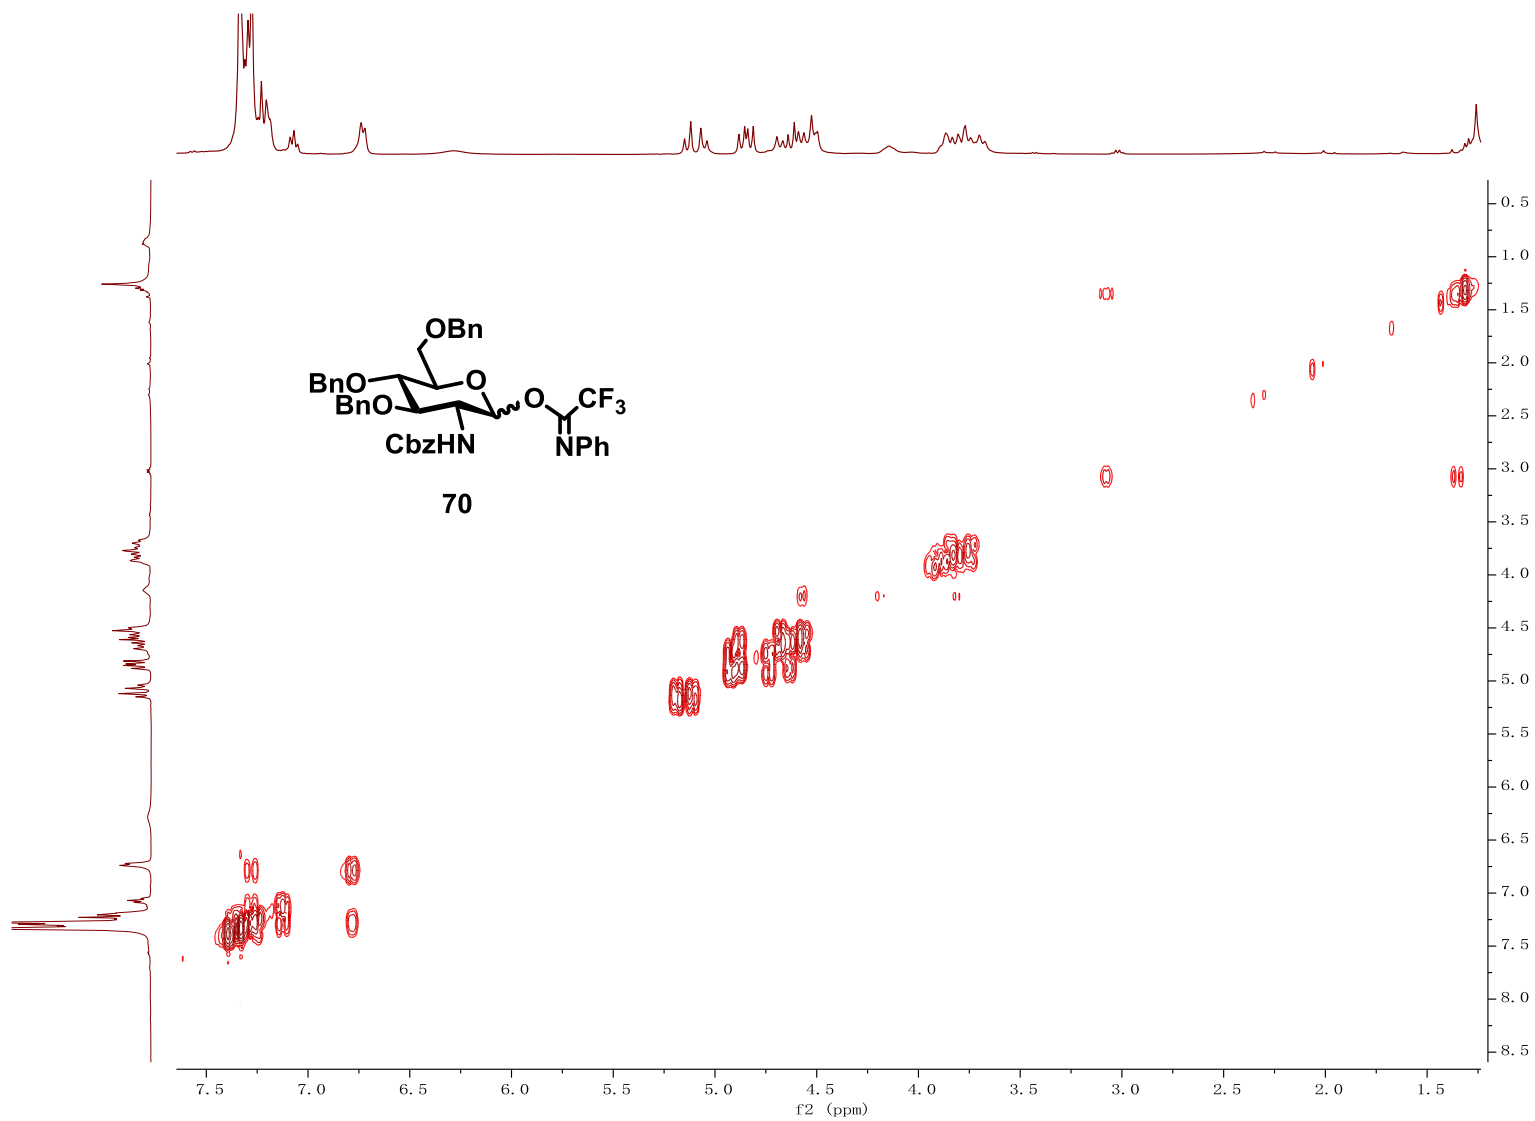

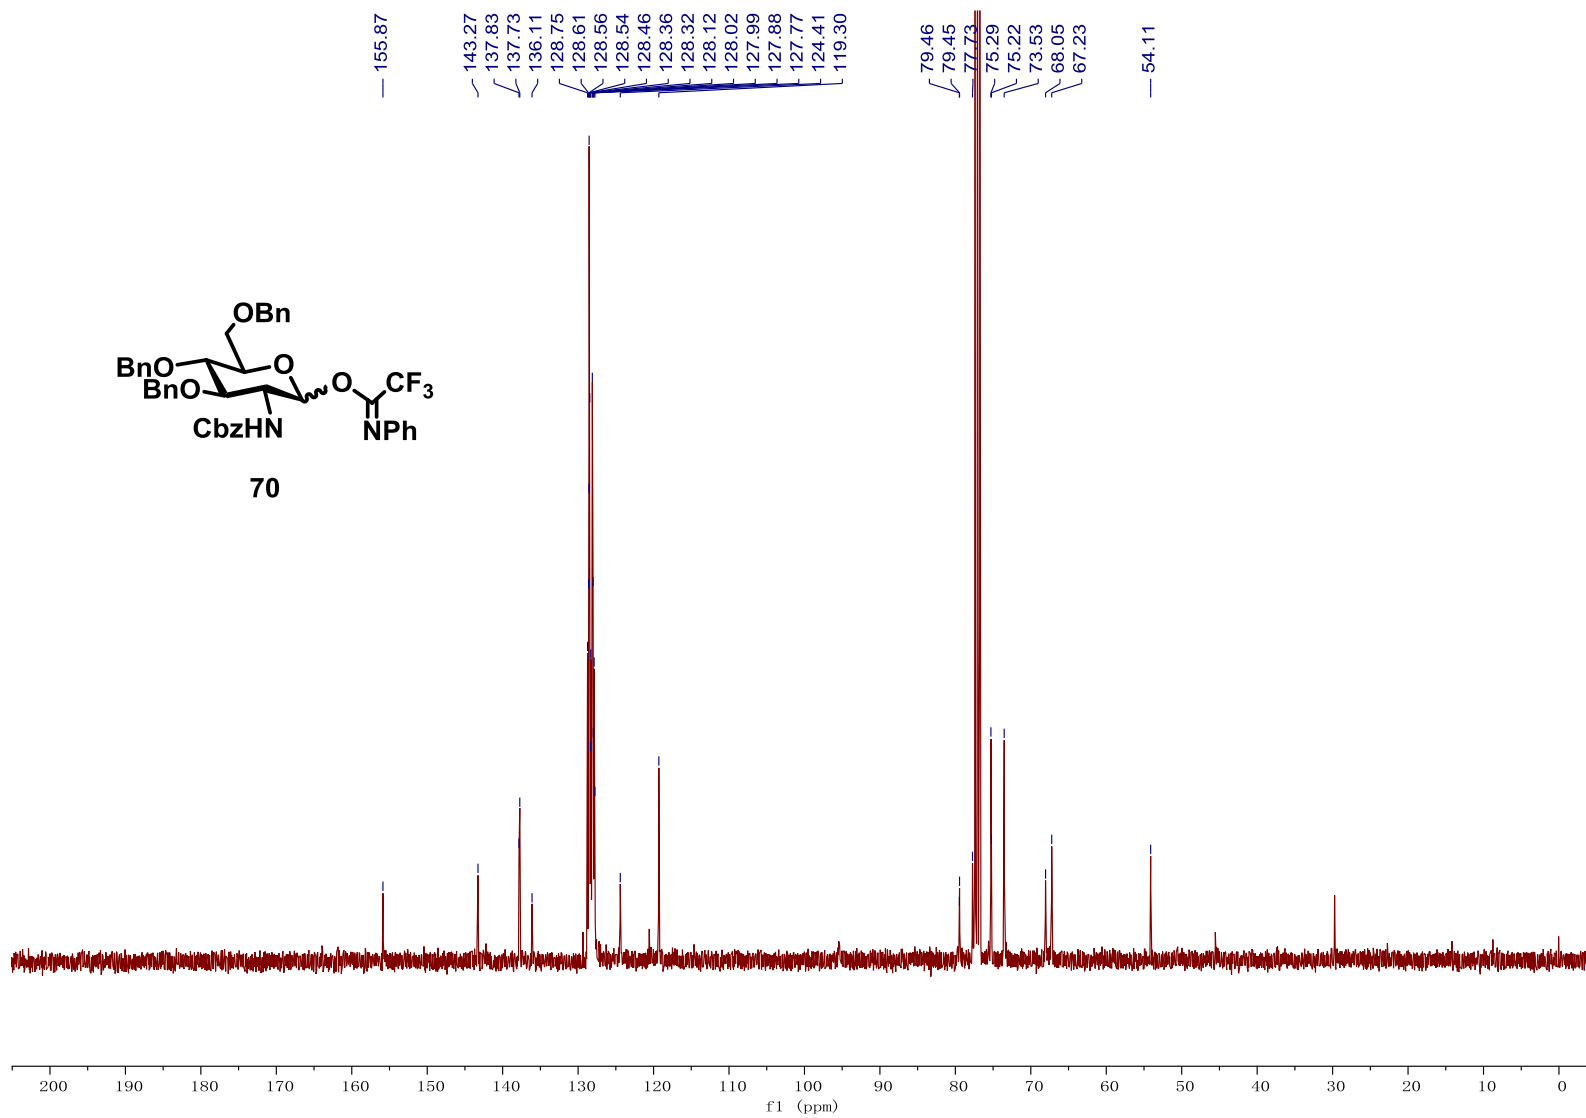

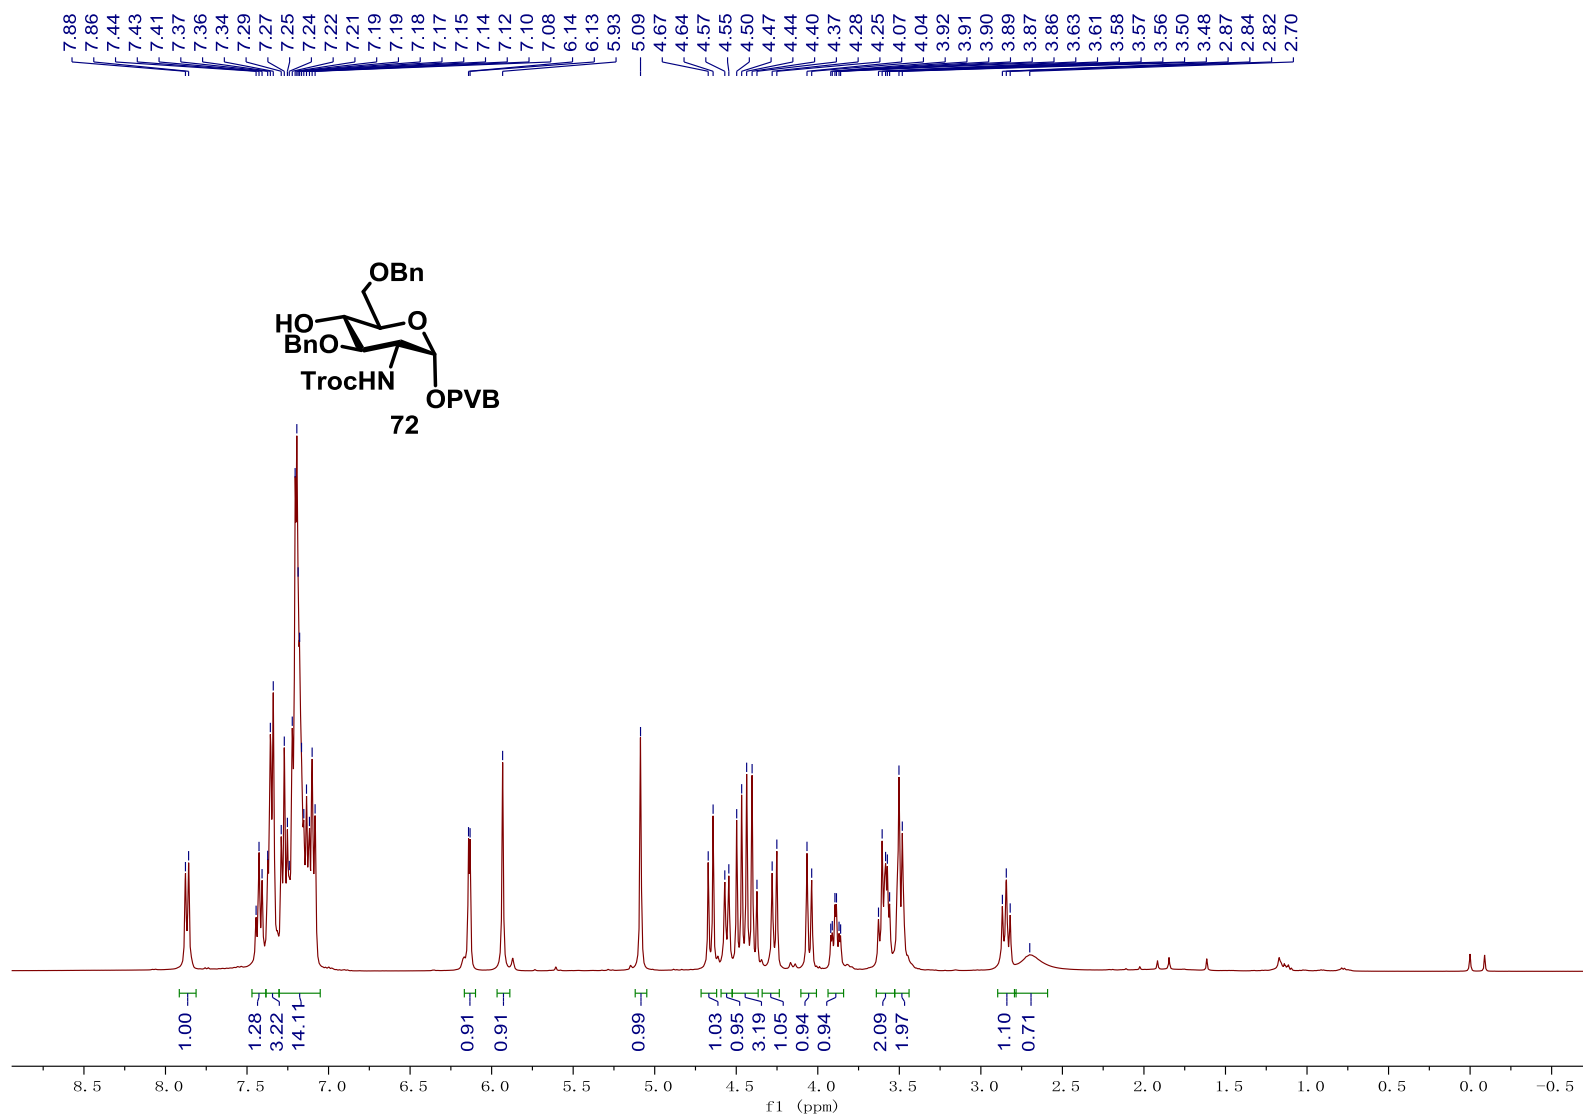

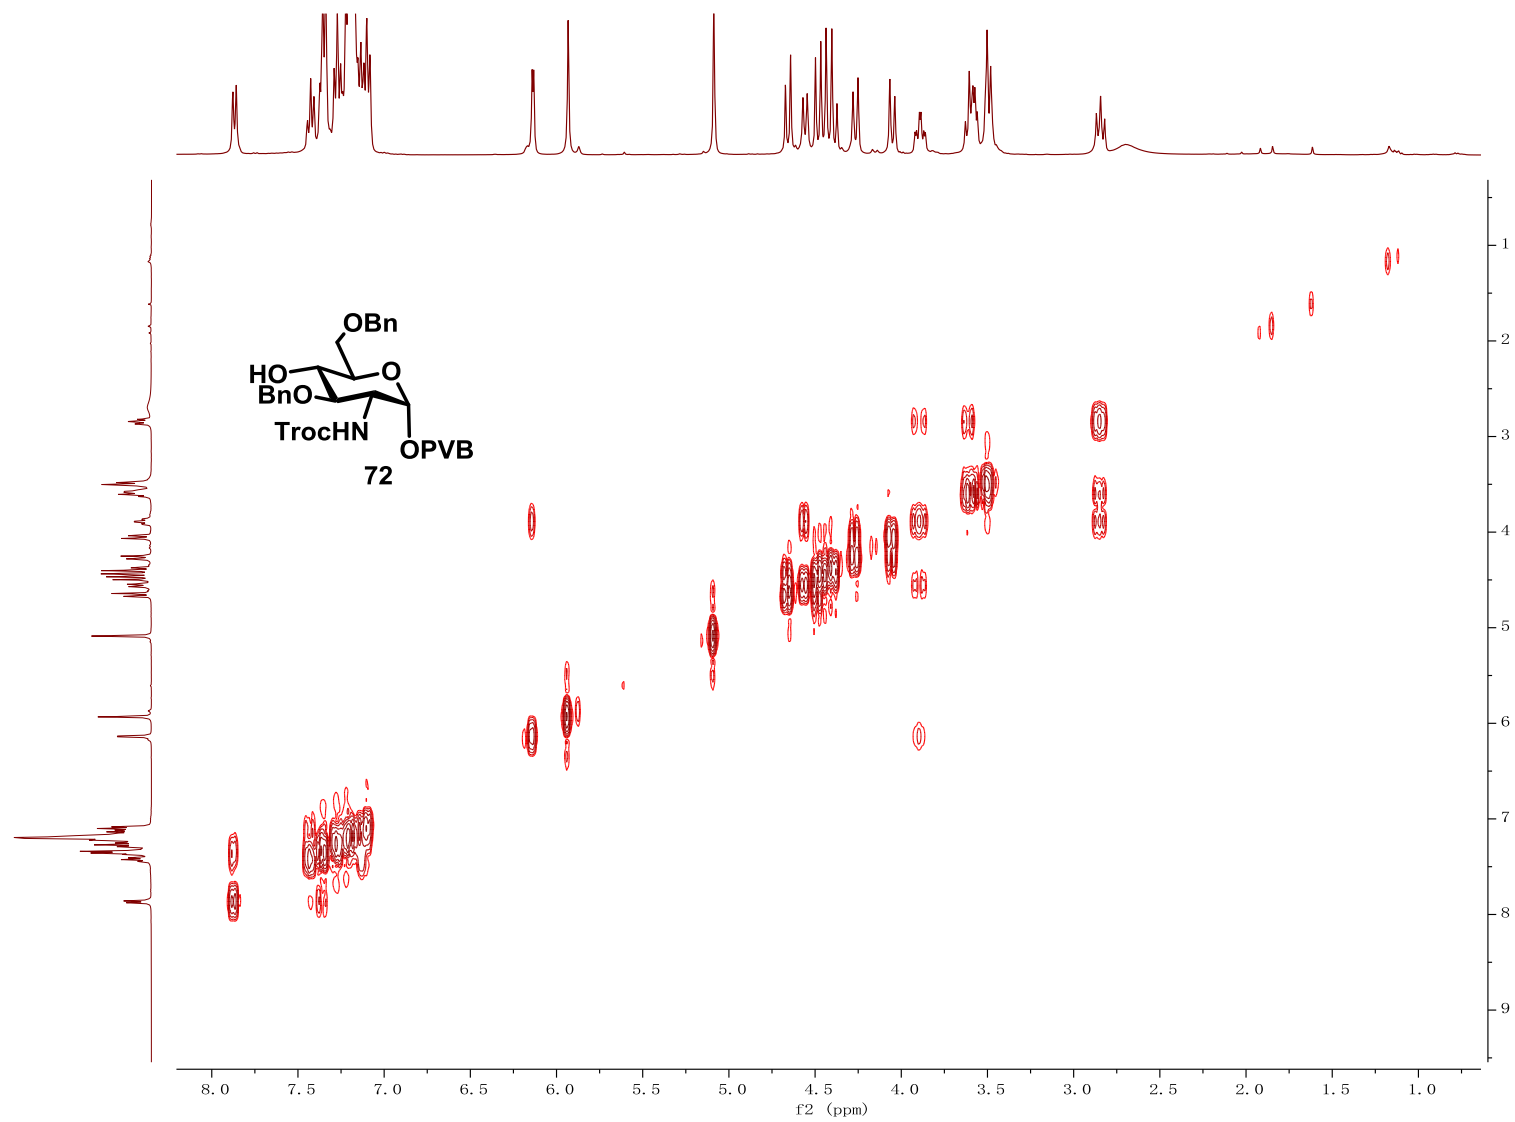

S180



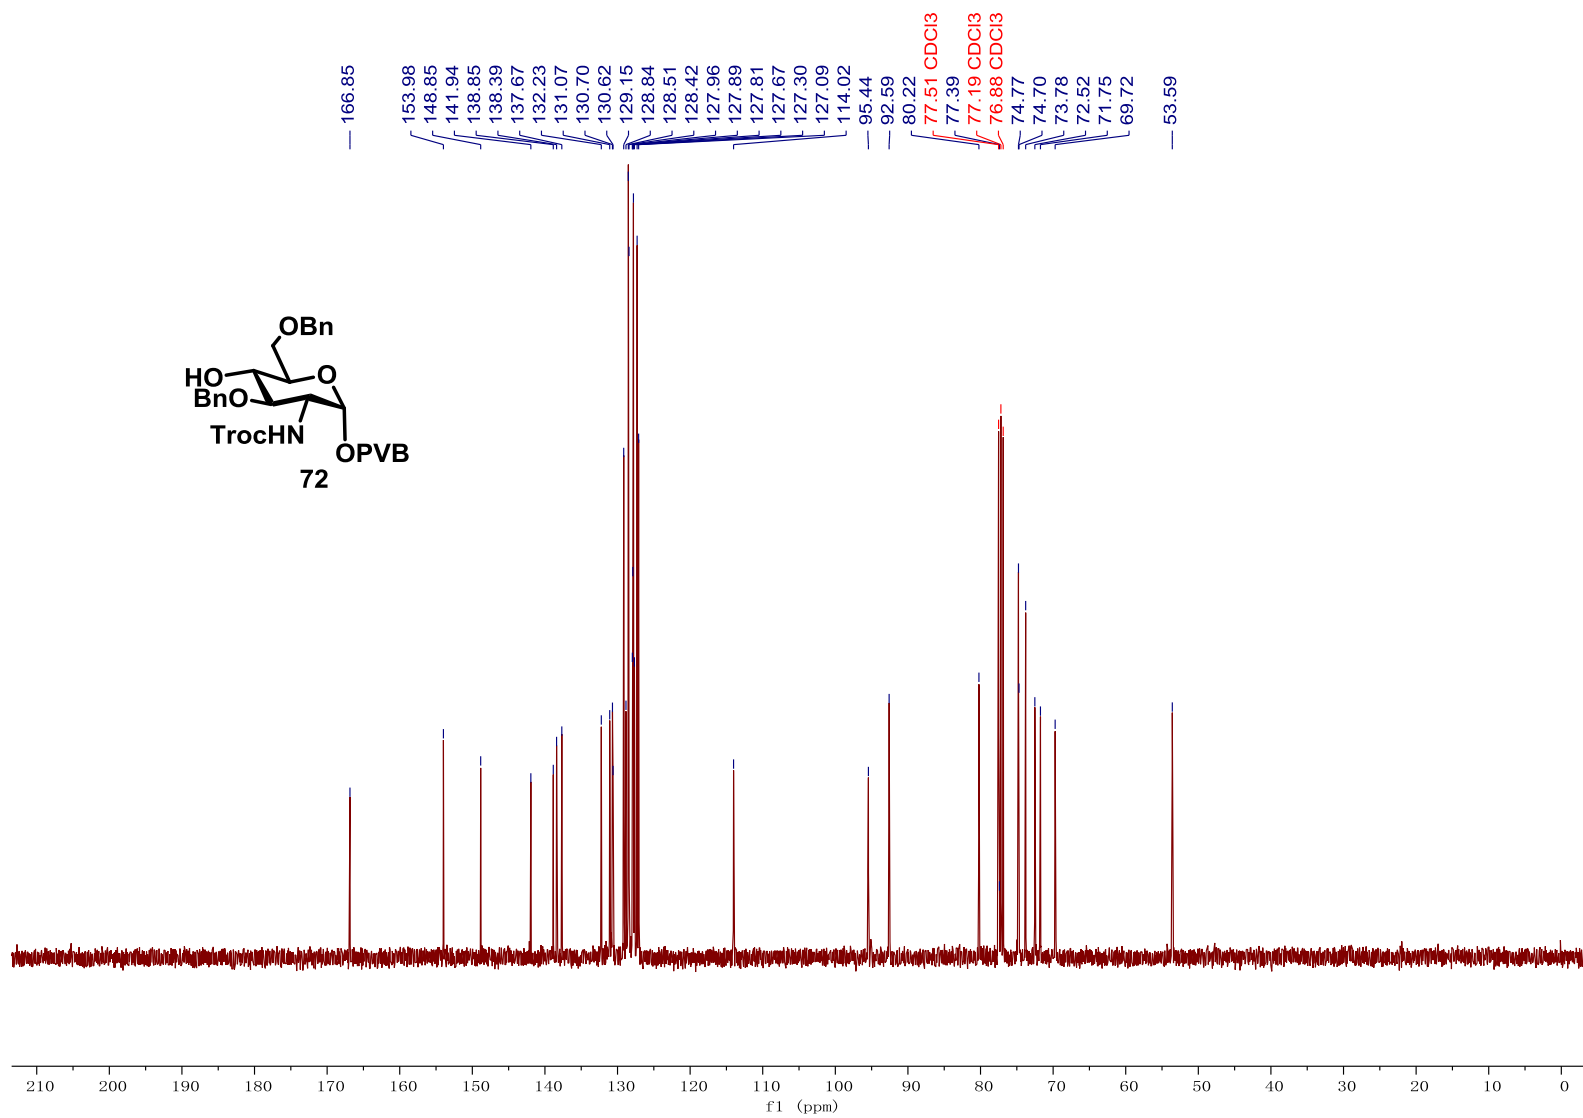

S181

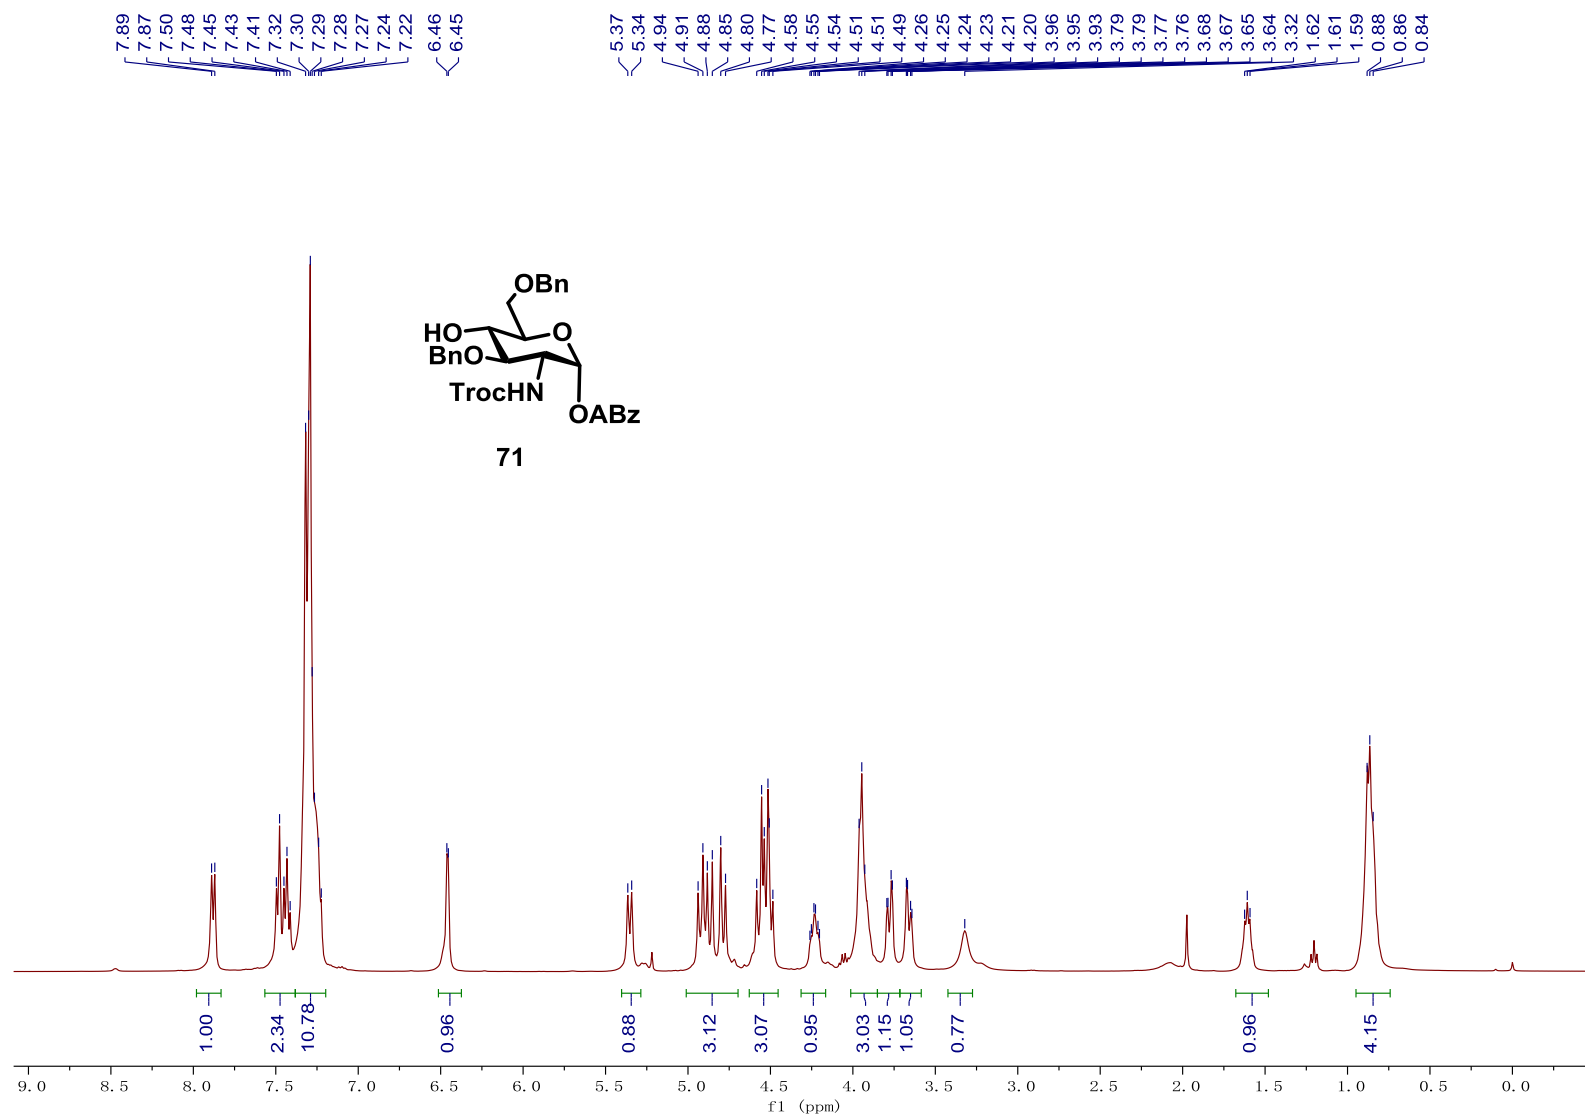

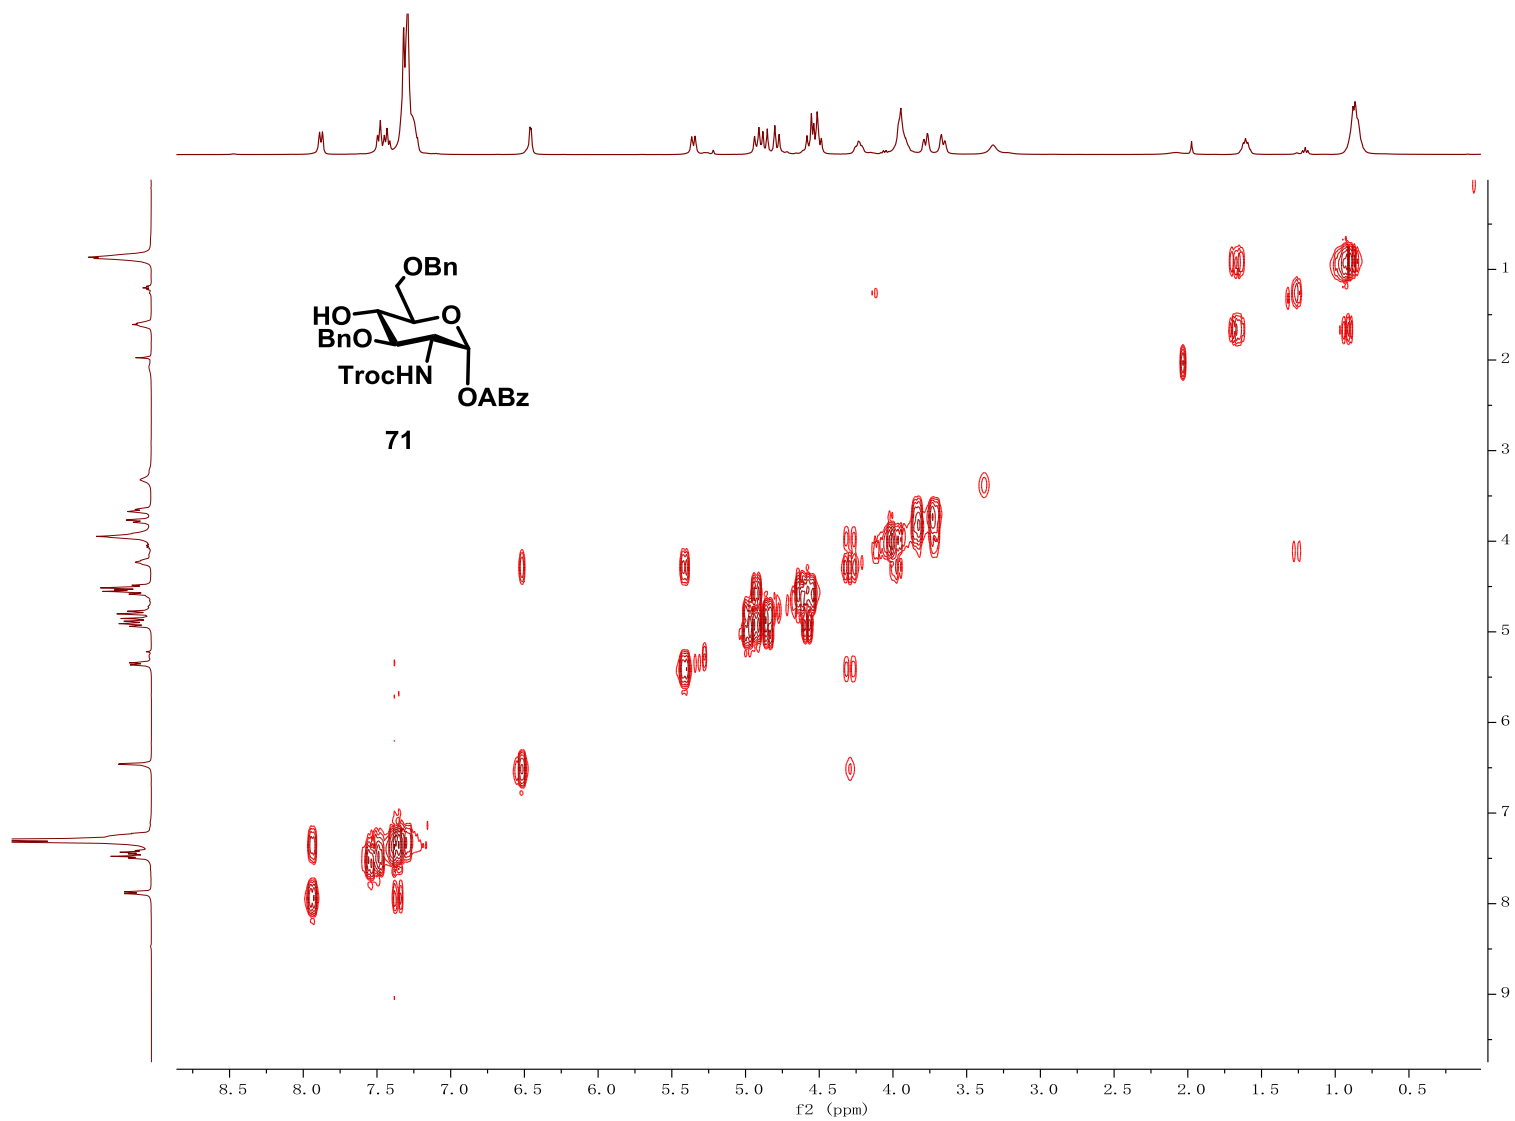

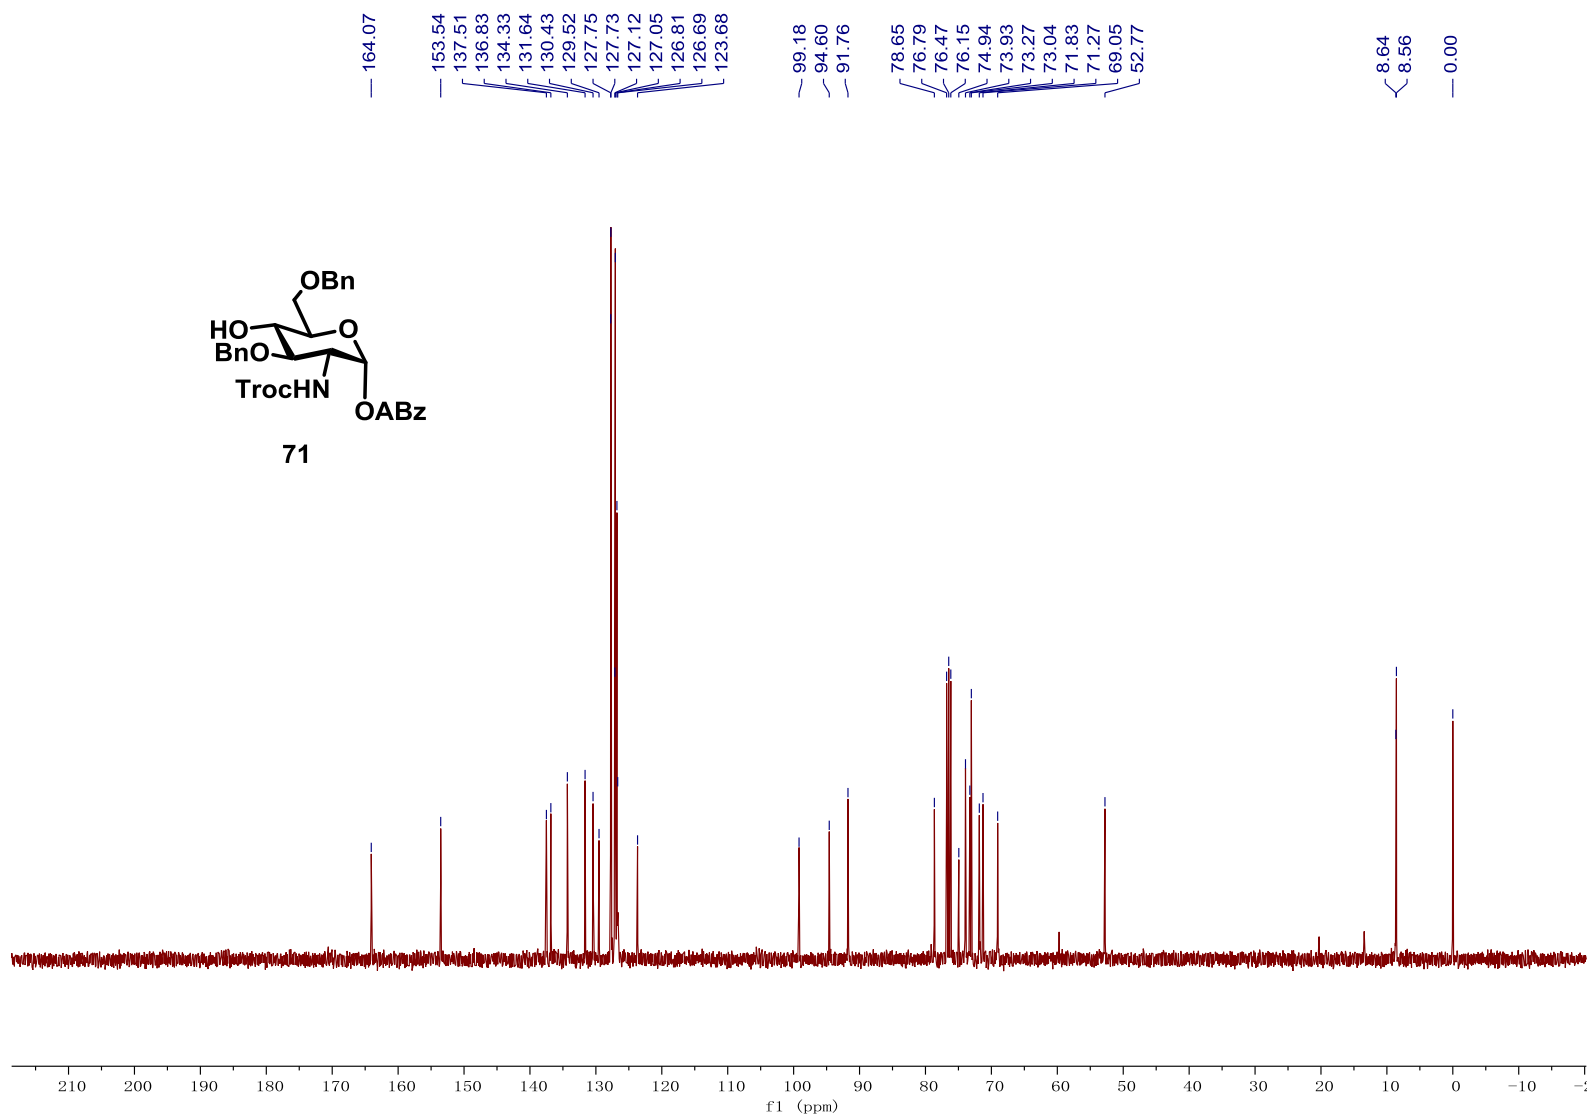

S184

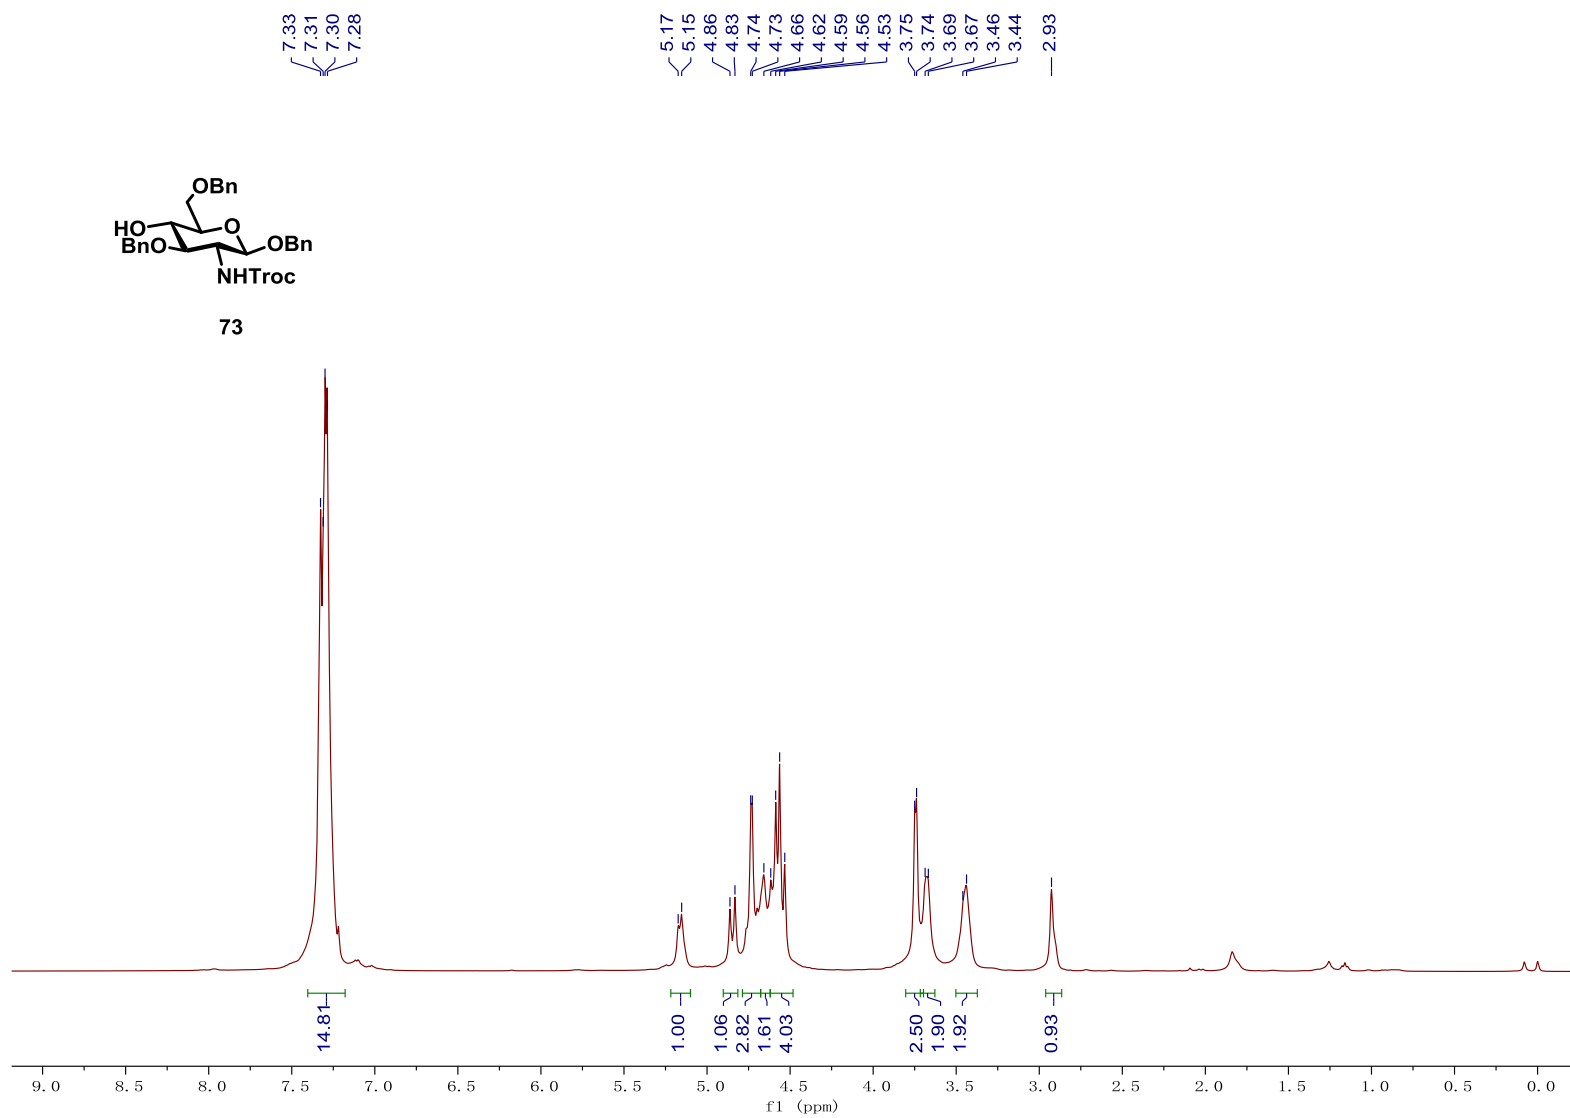

S185

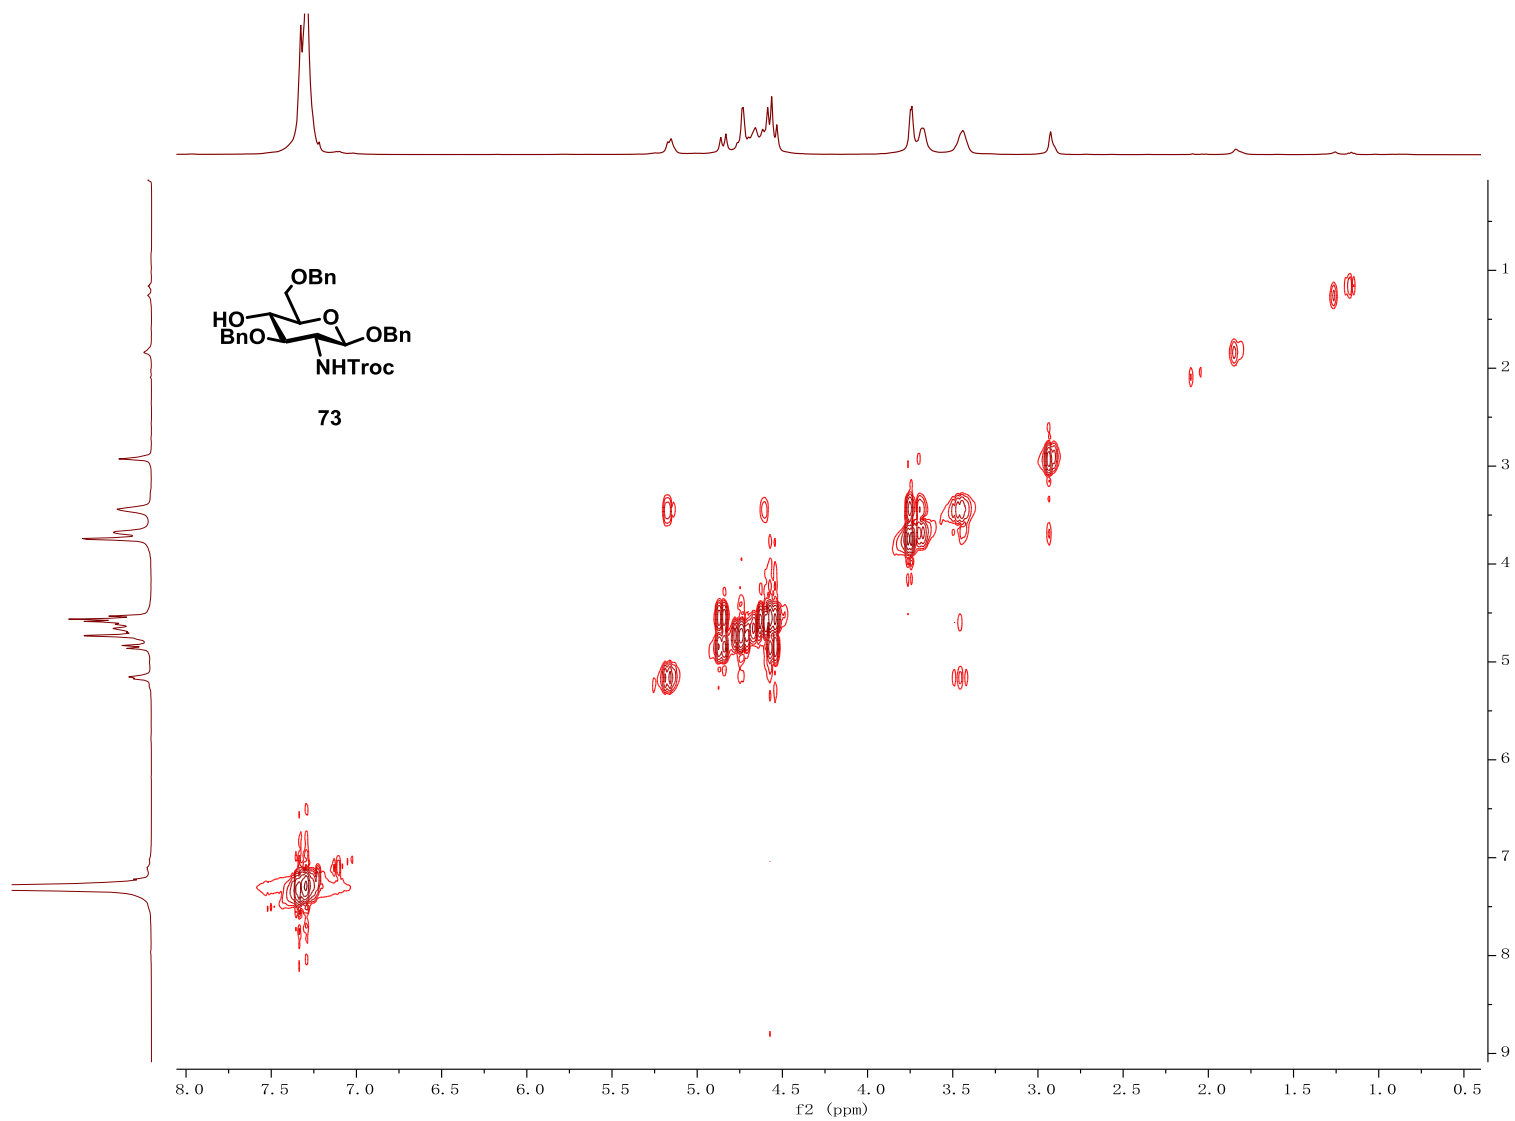

S186

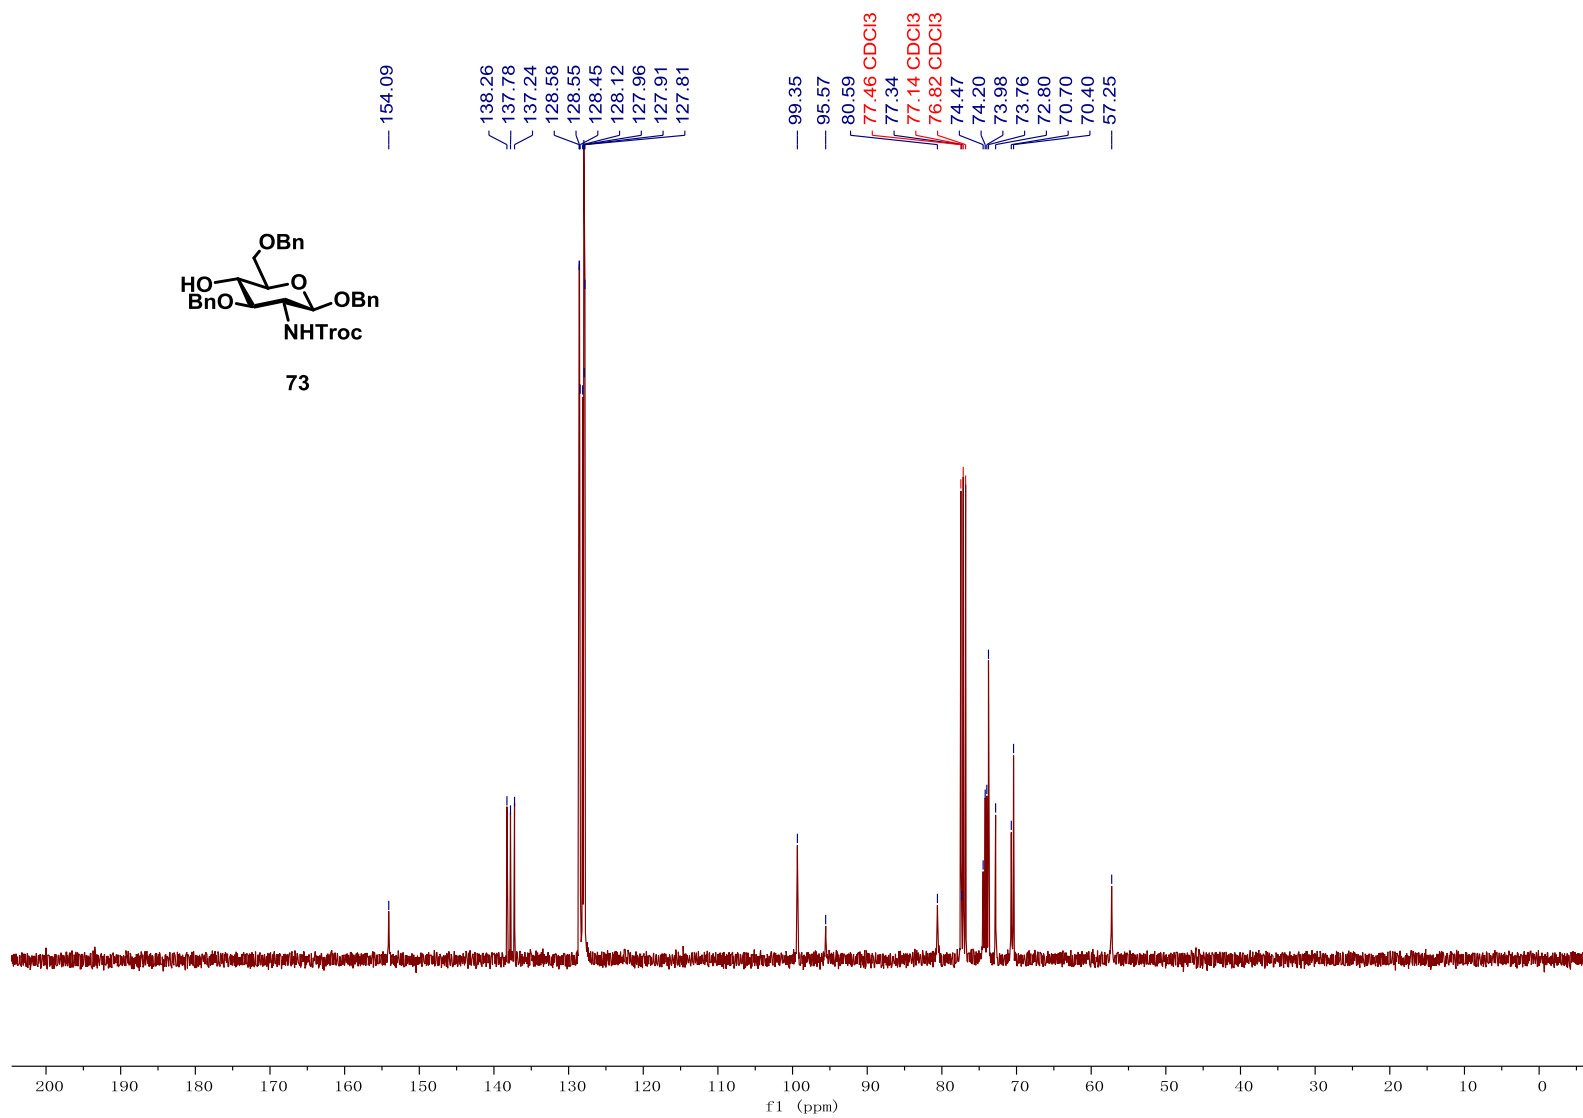

S187

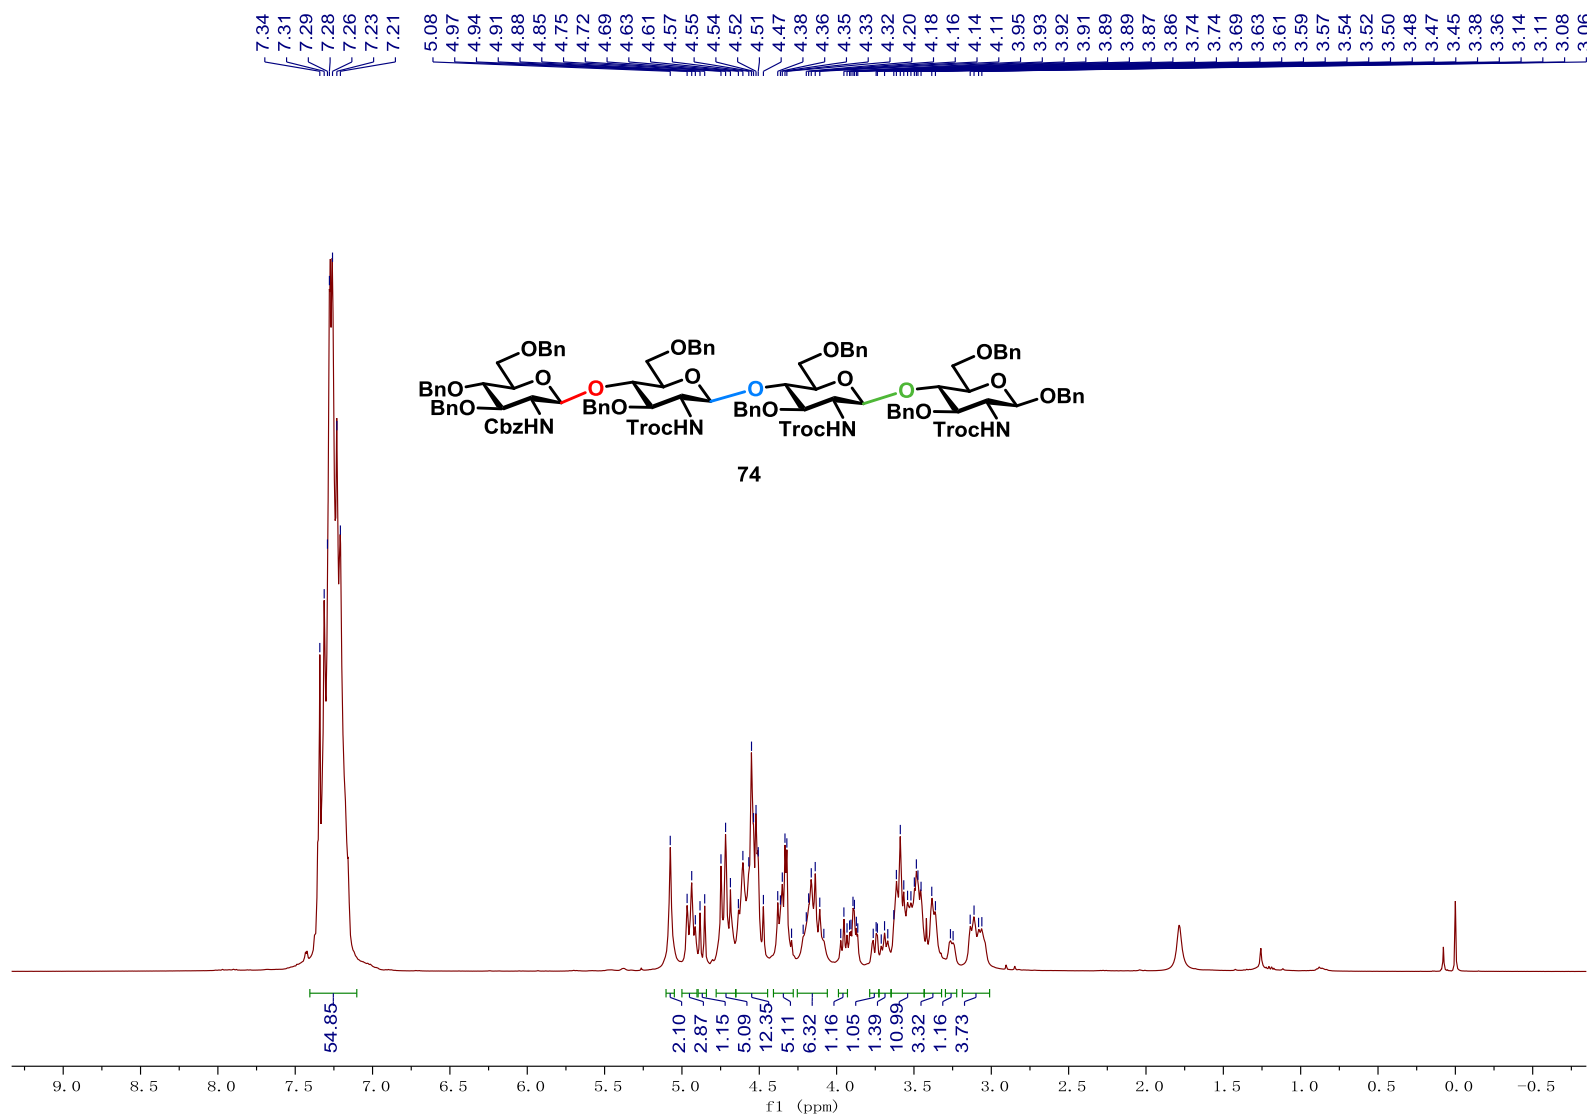

S188



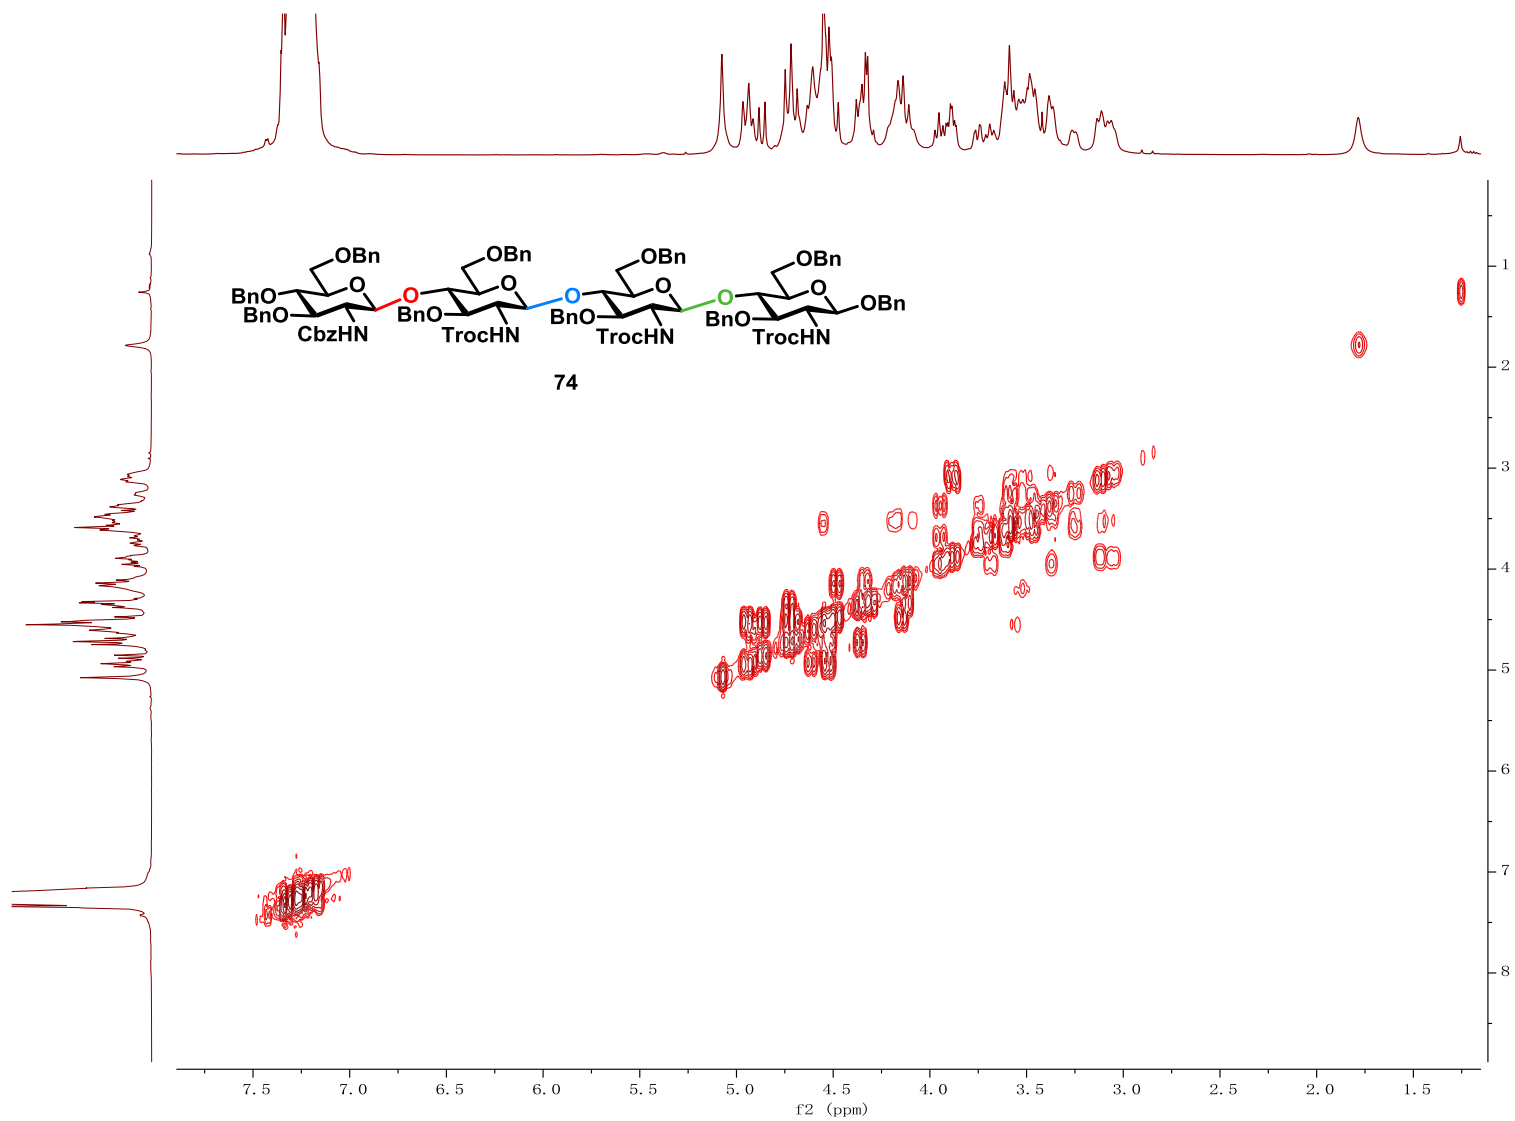

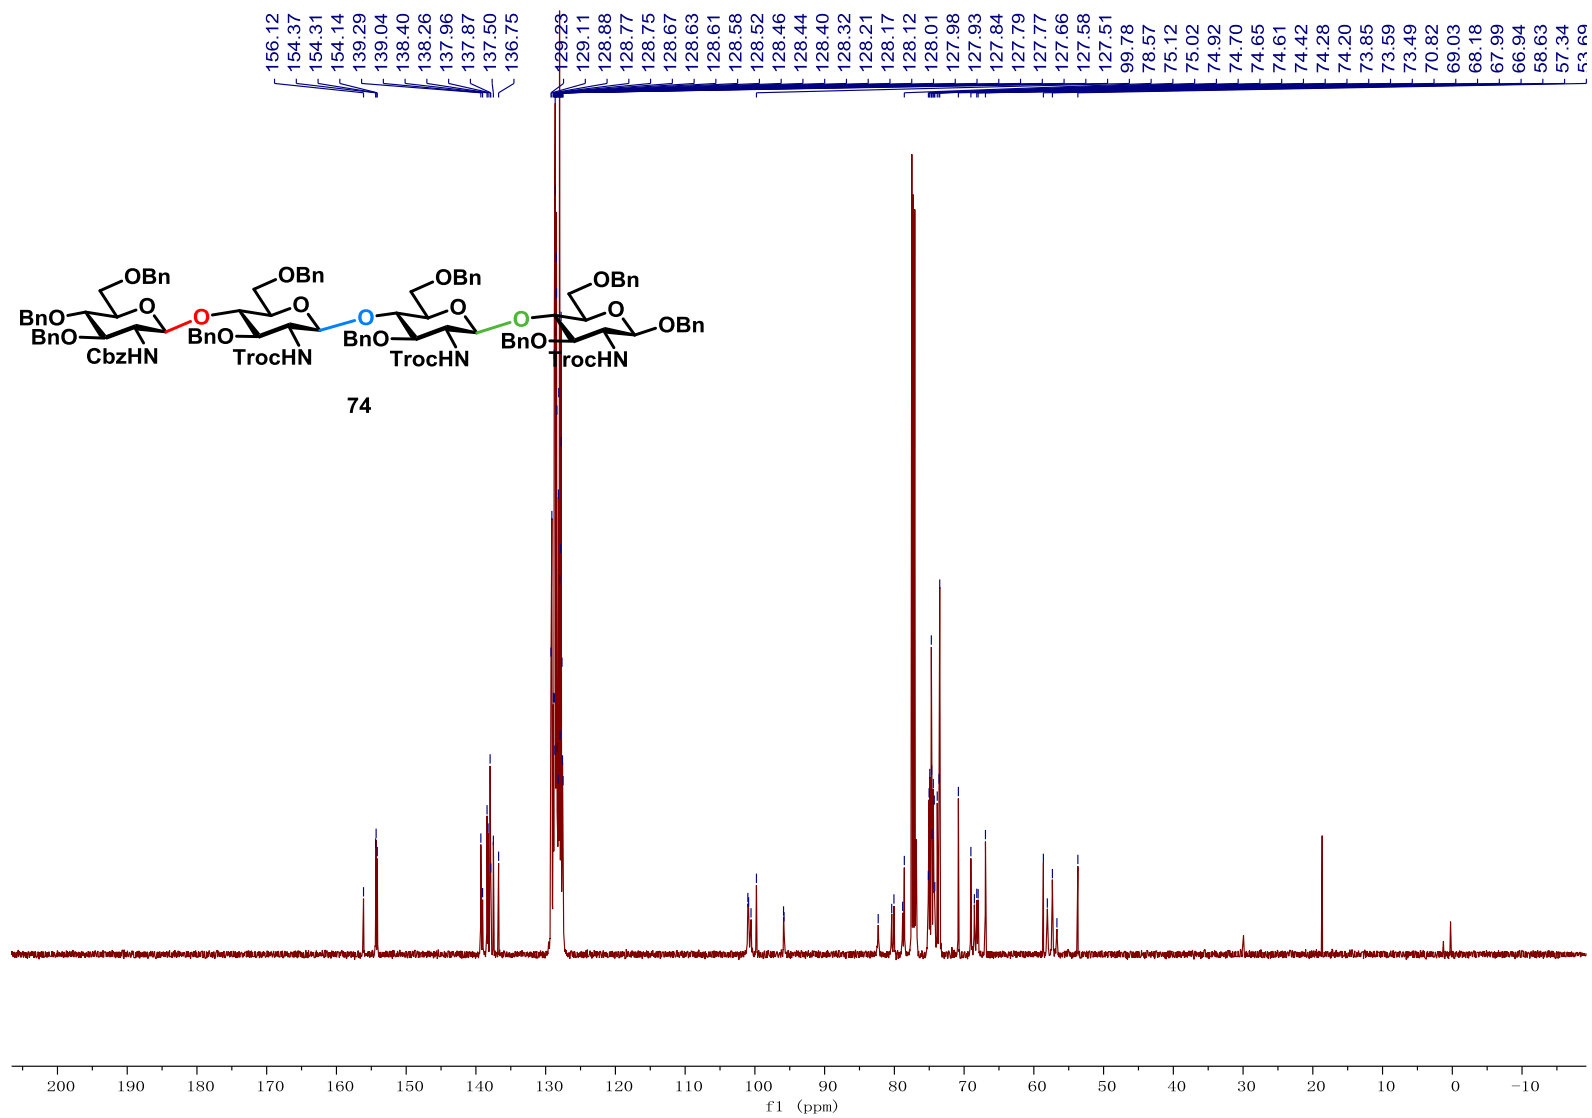

S190

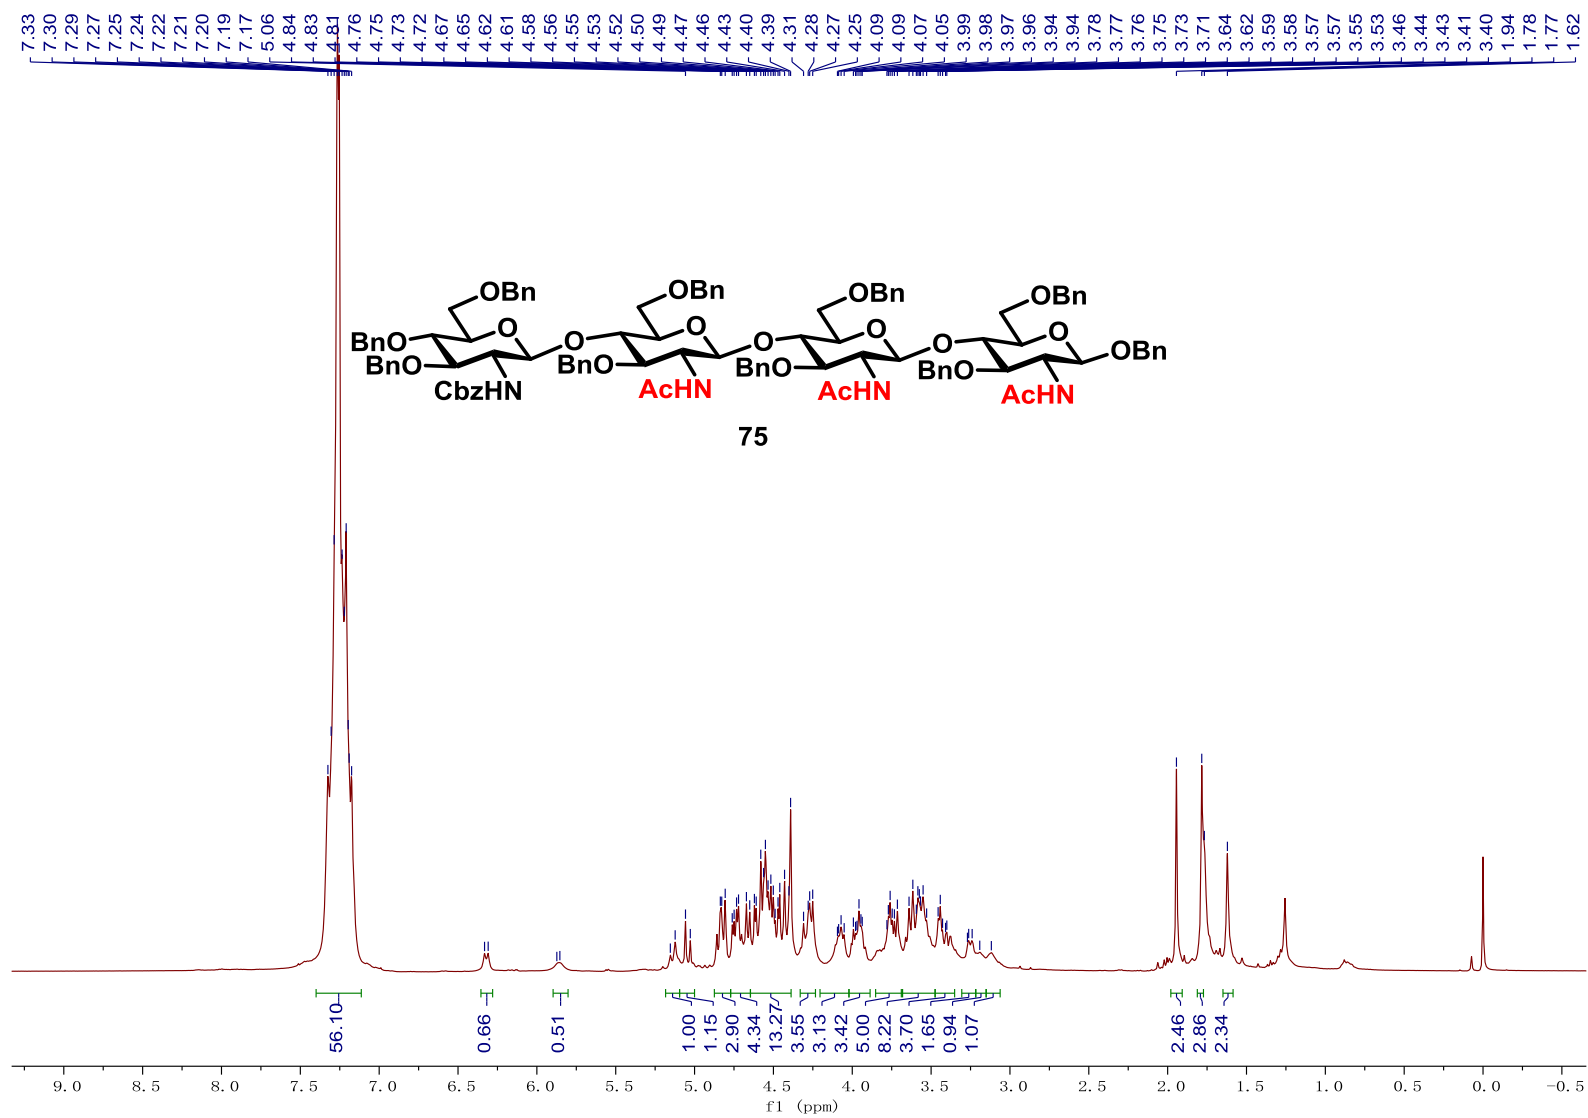

S191

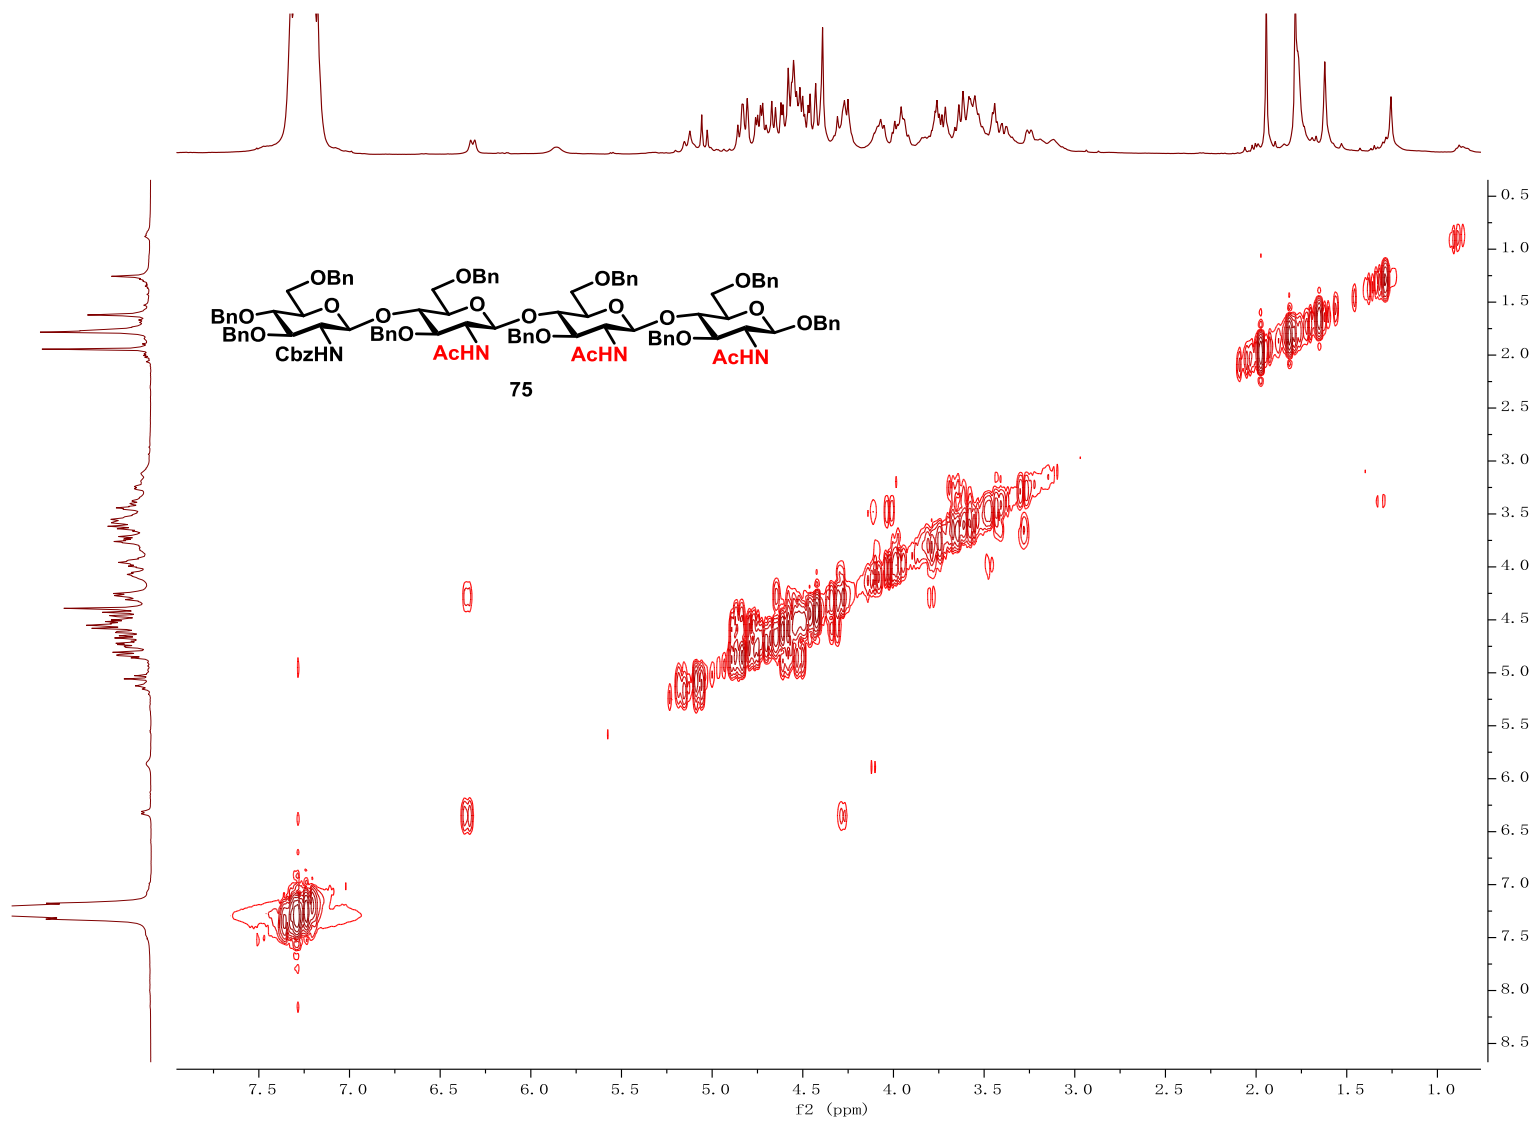



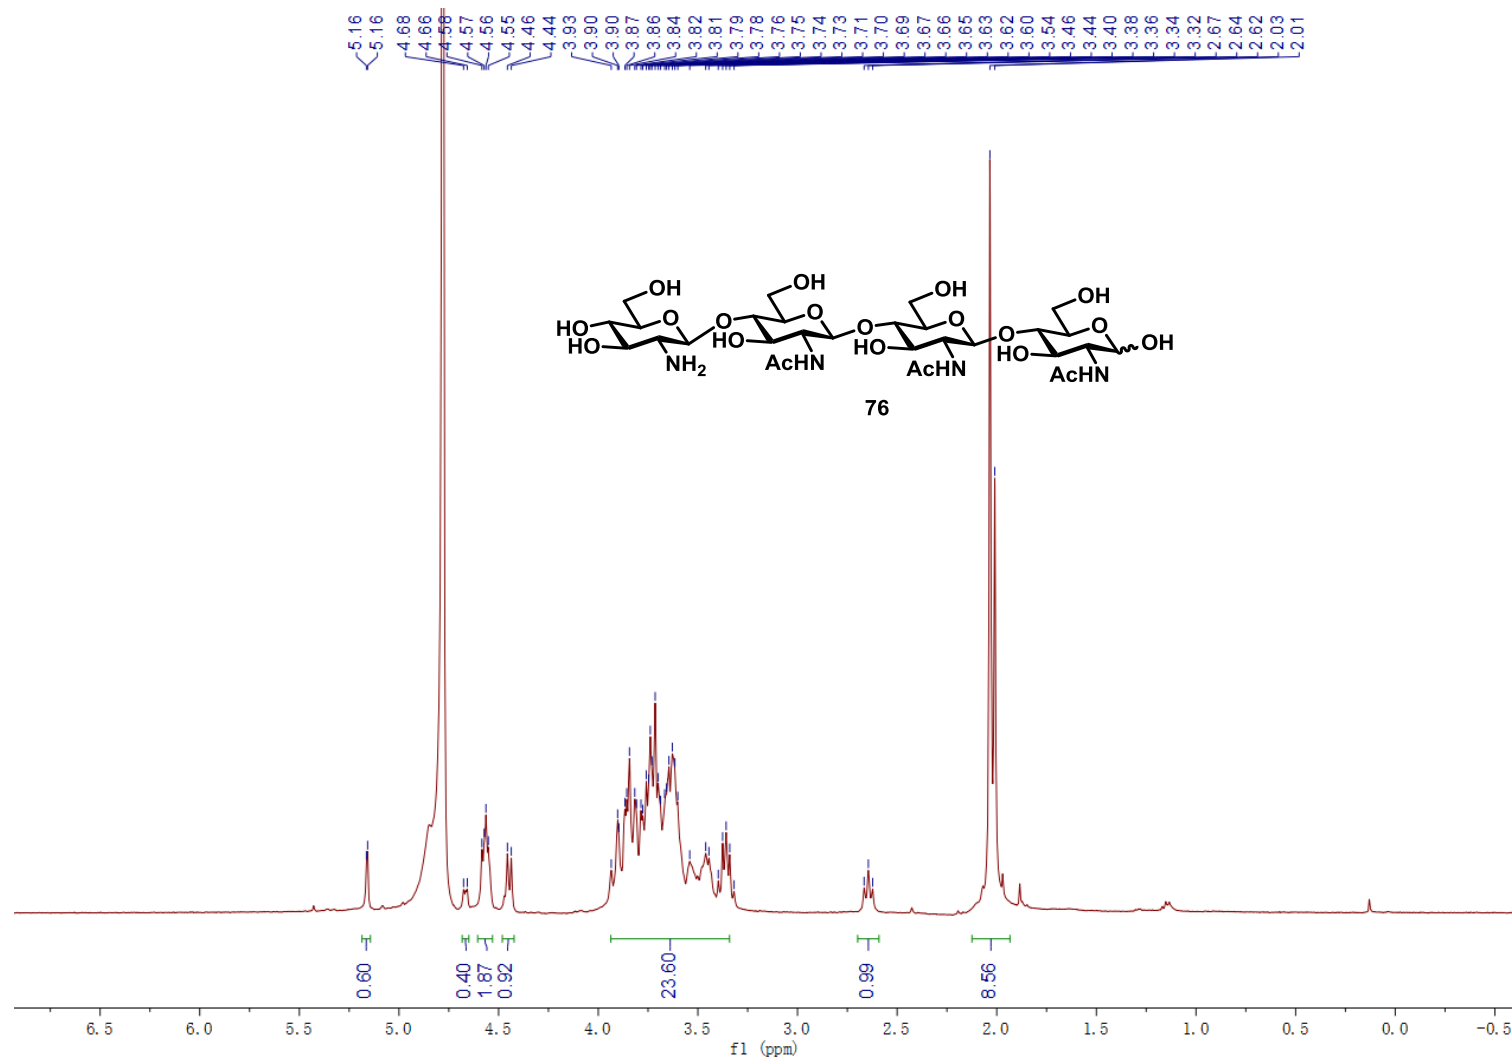

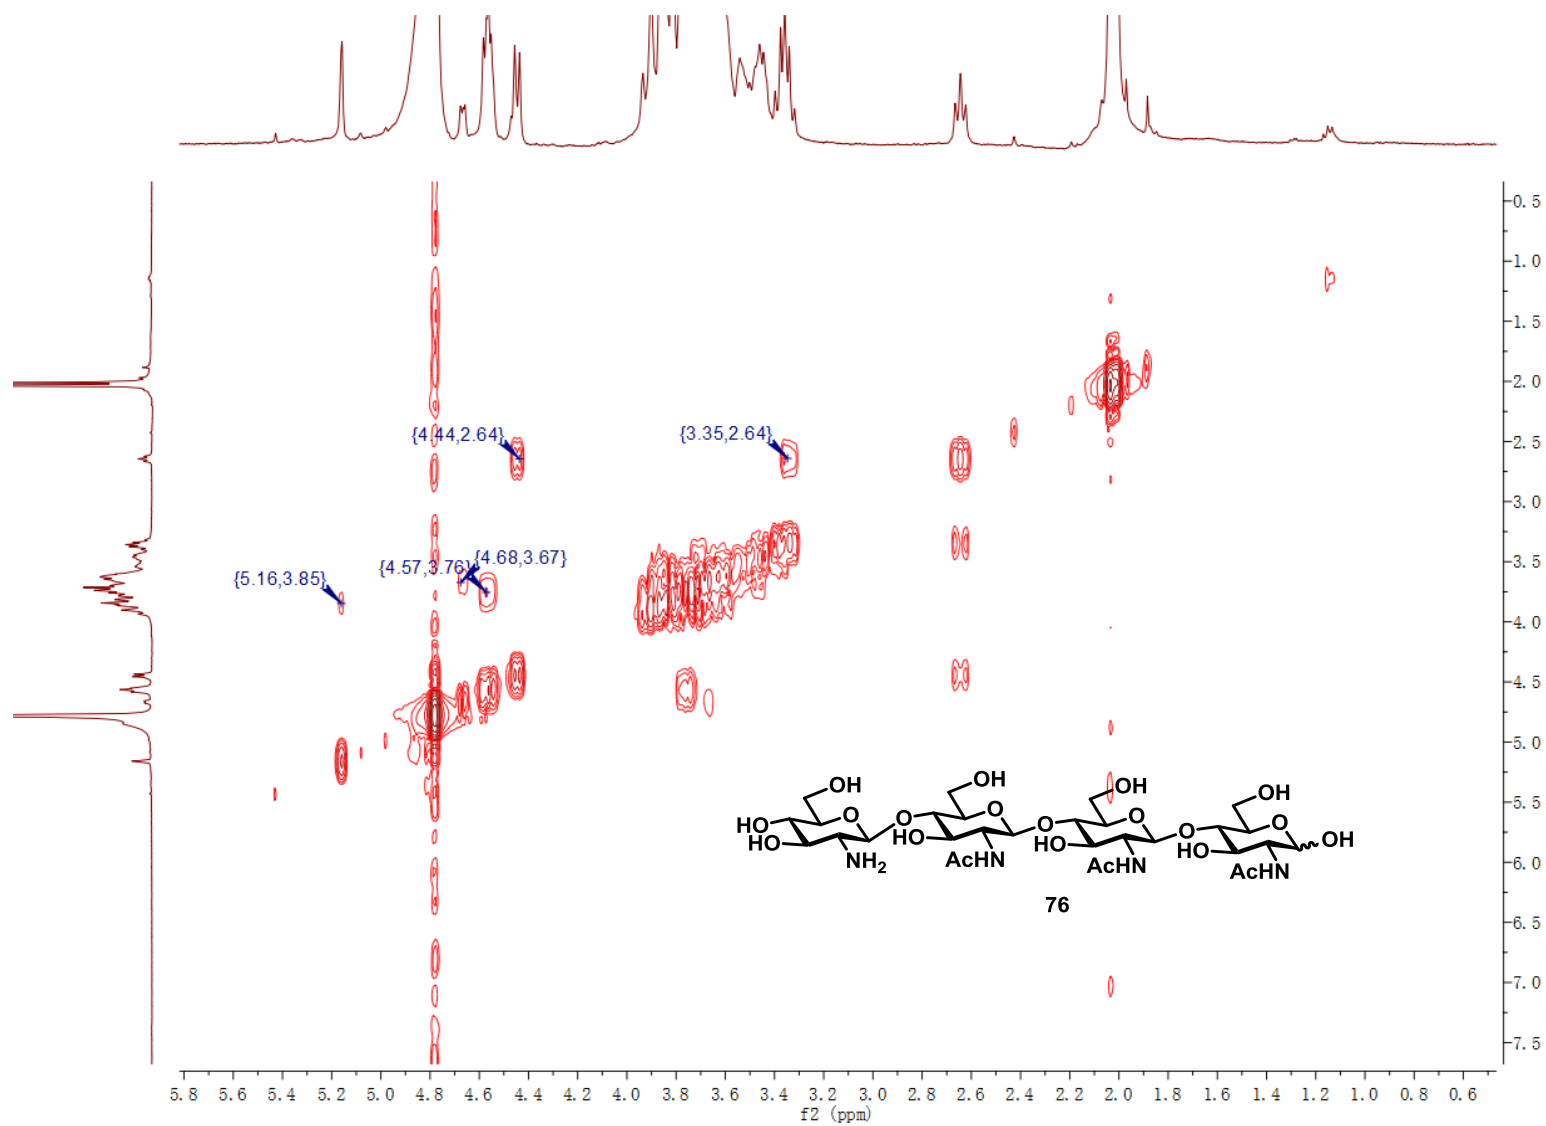

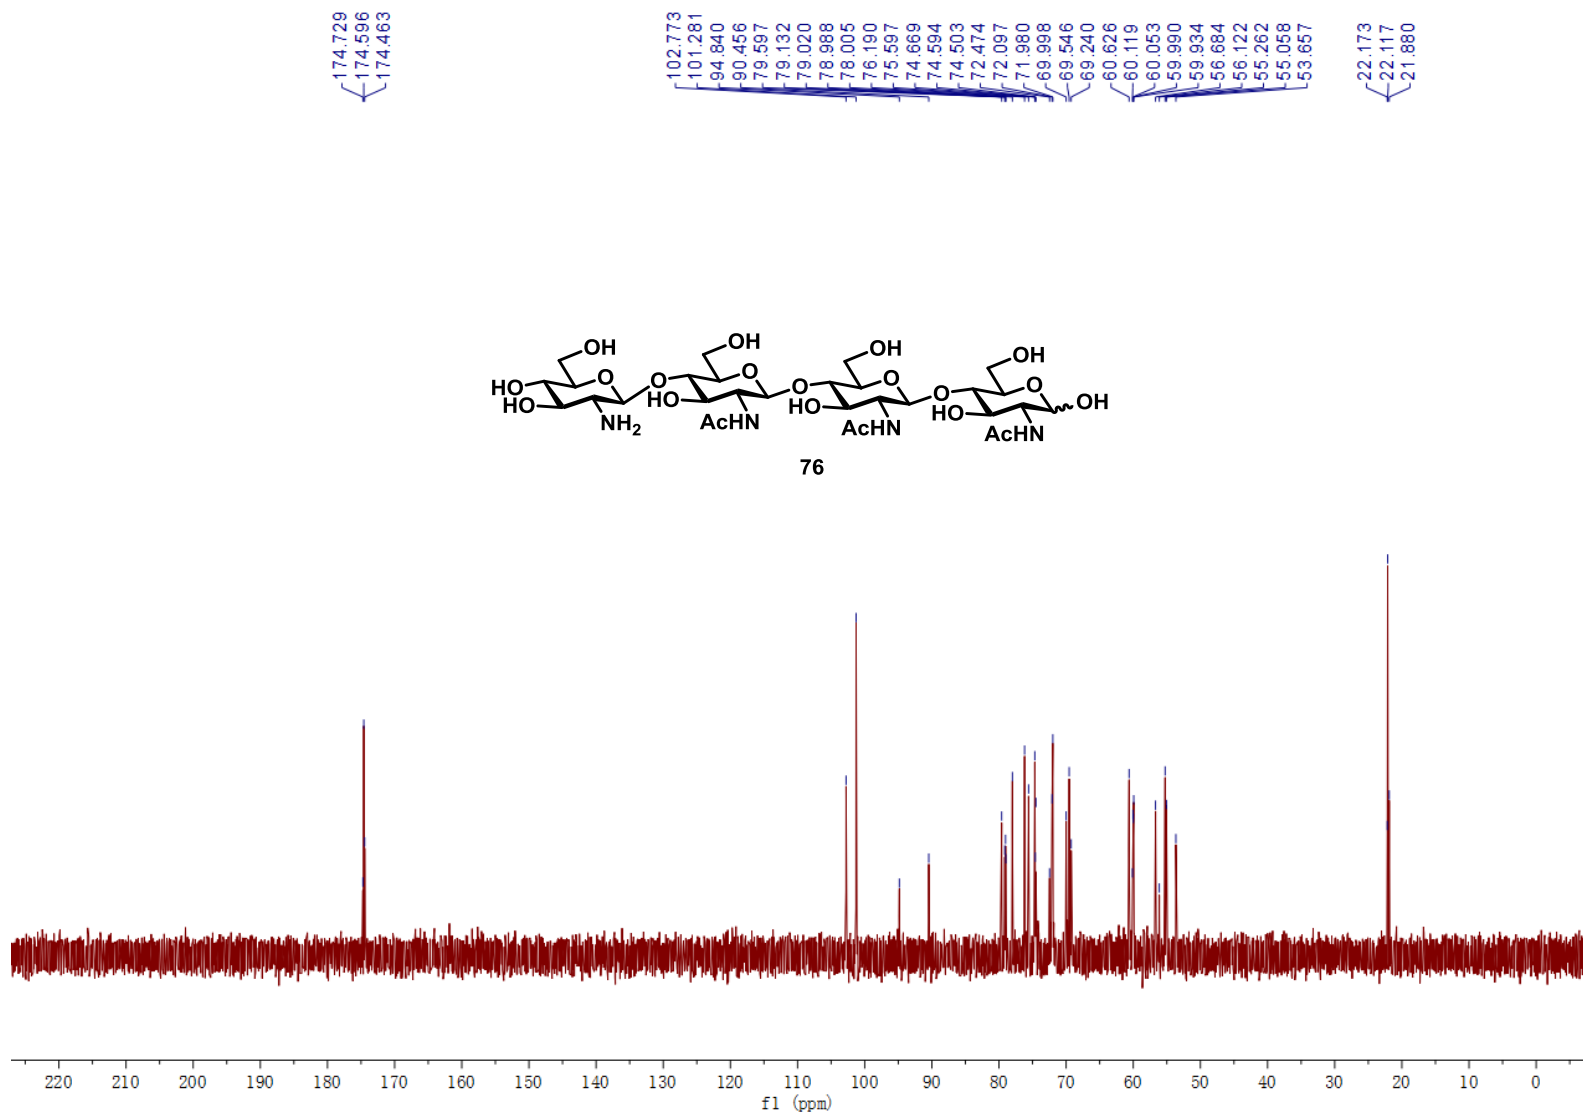

S196



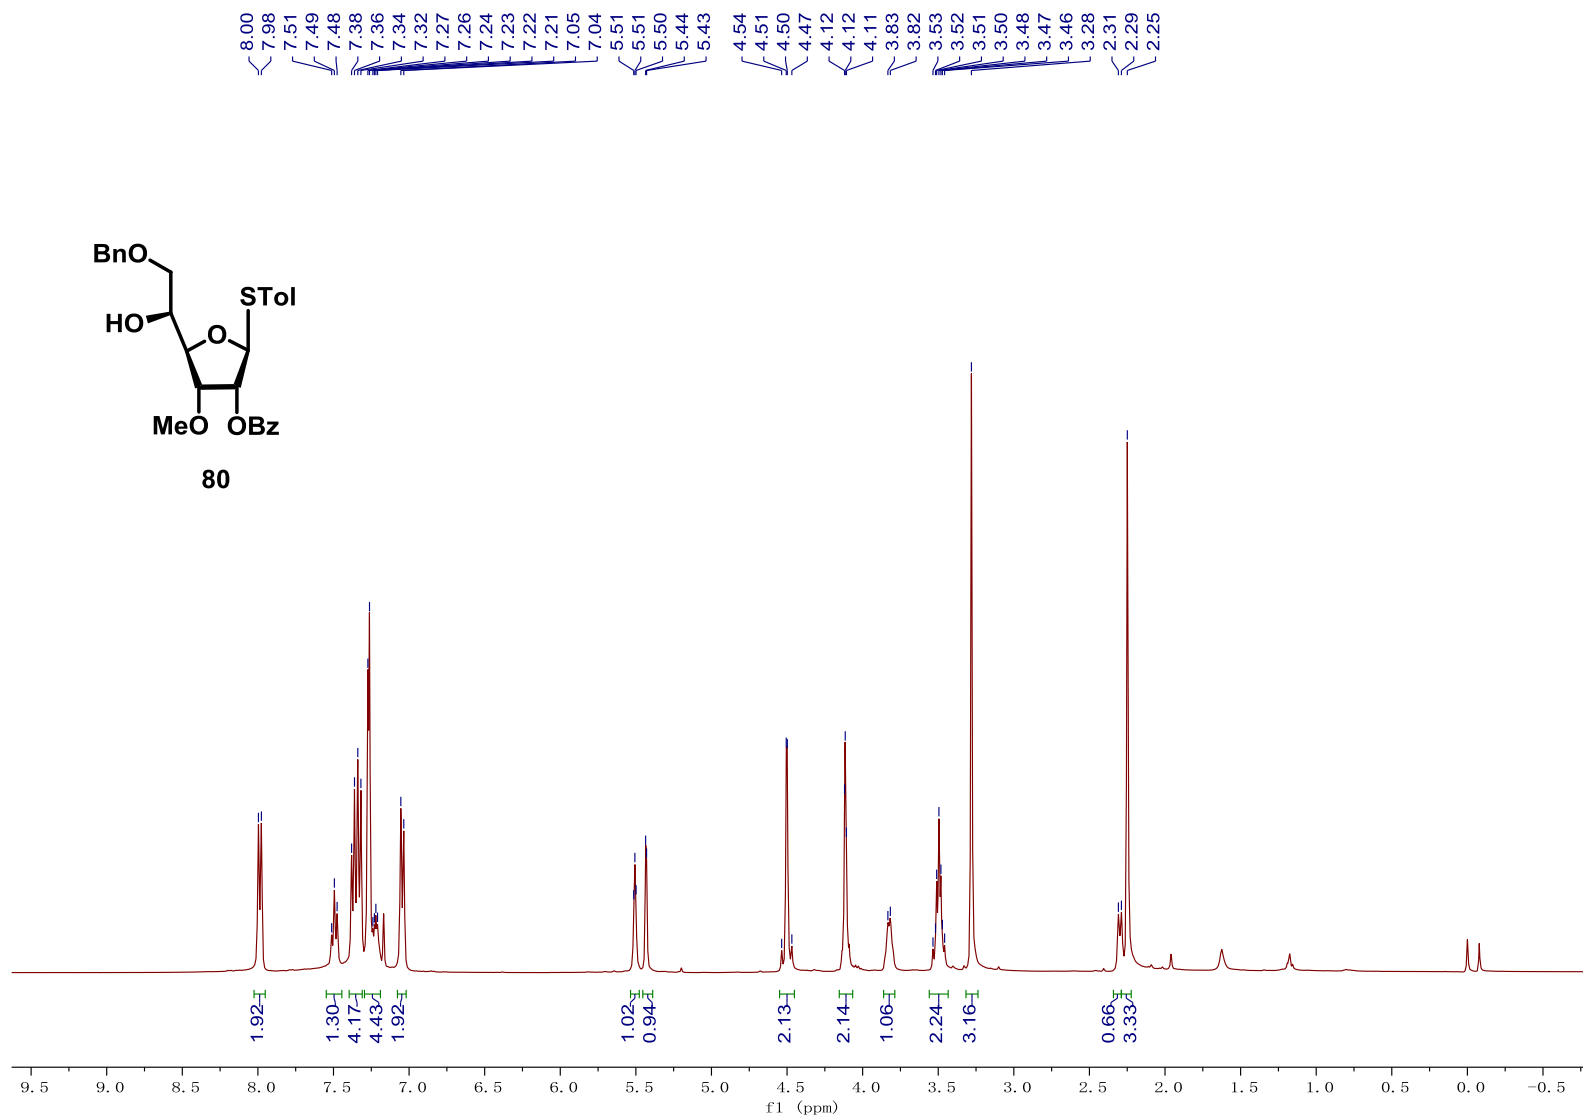

S197

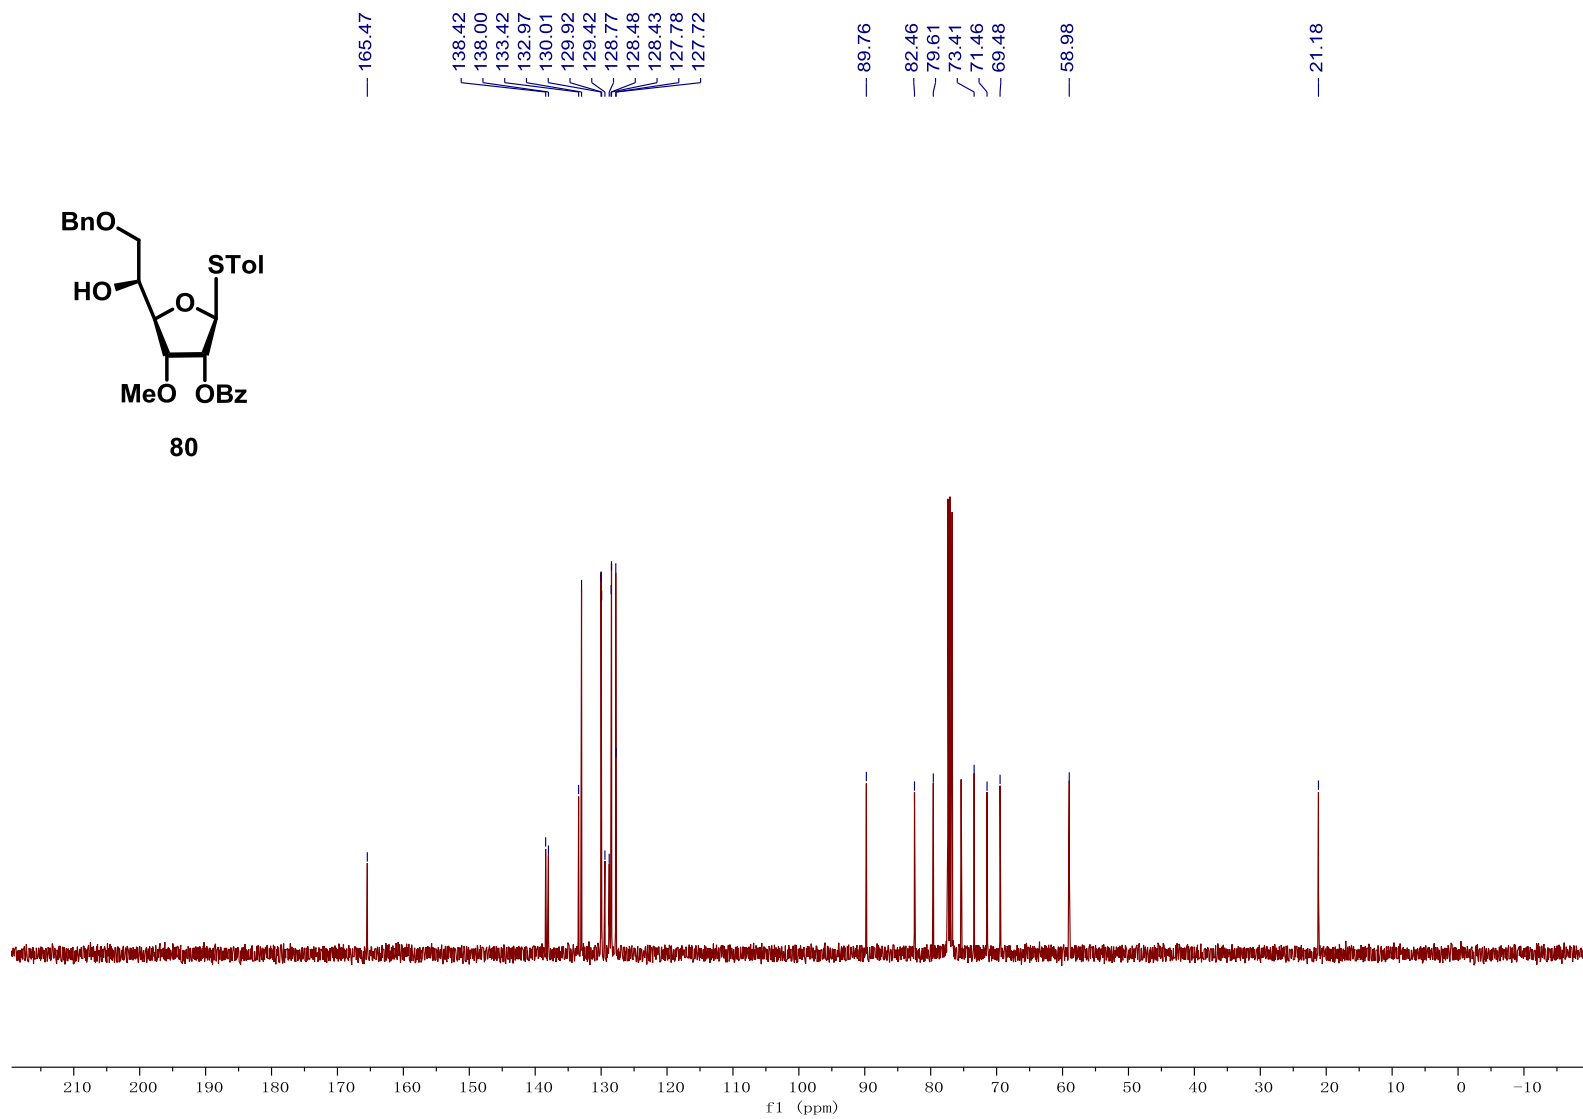

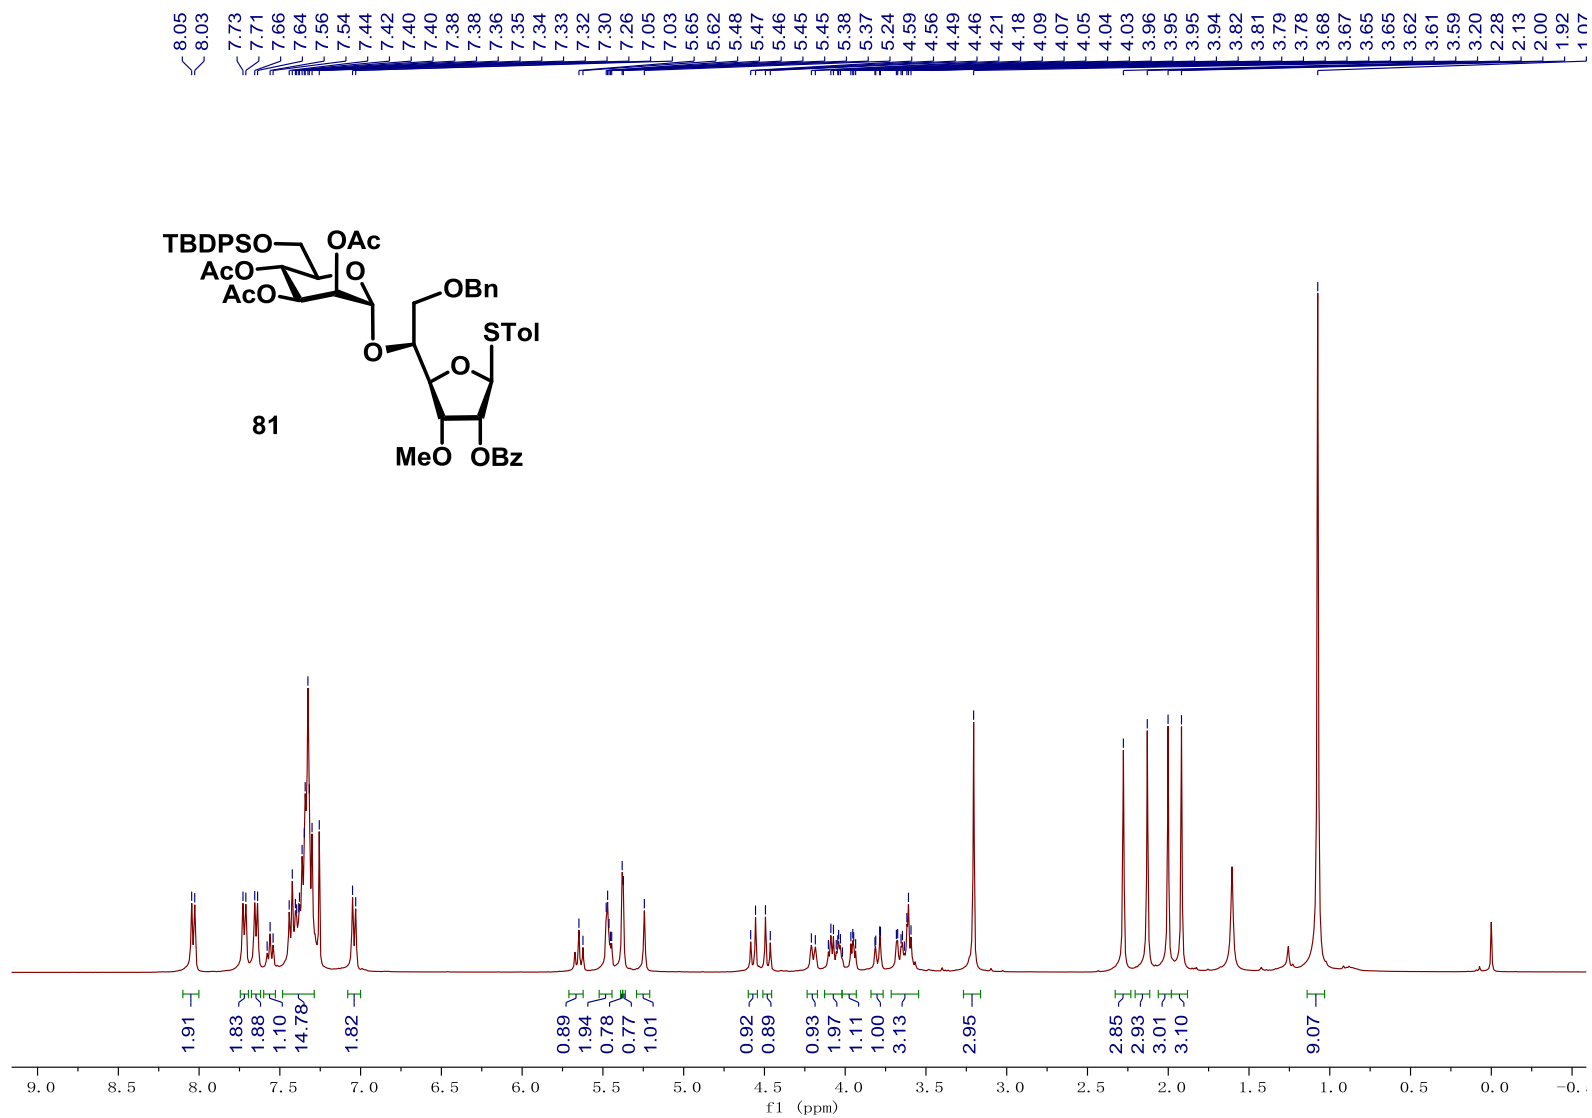

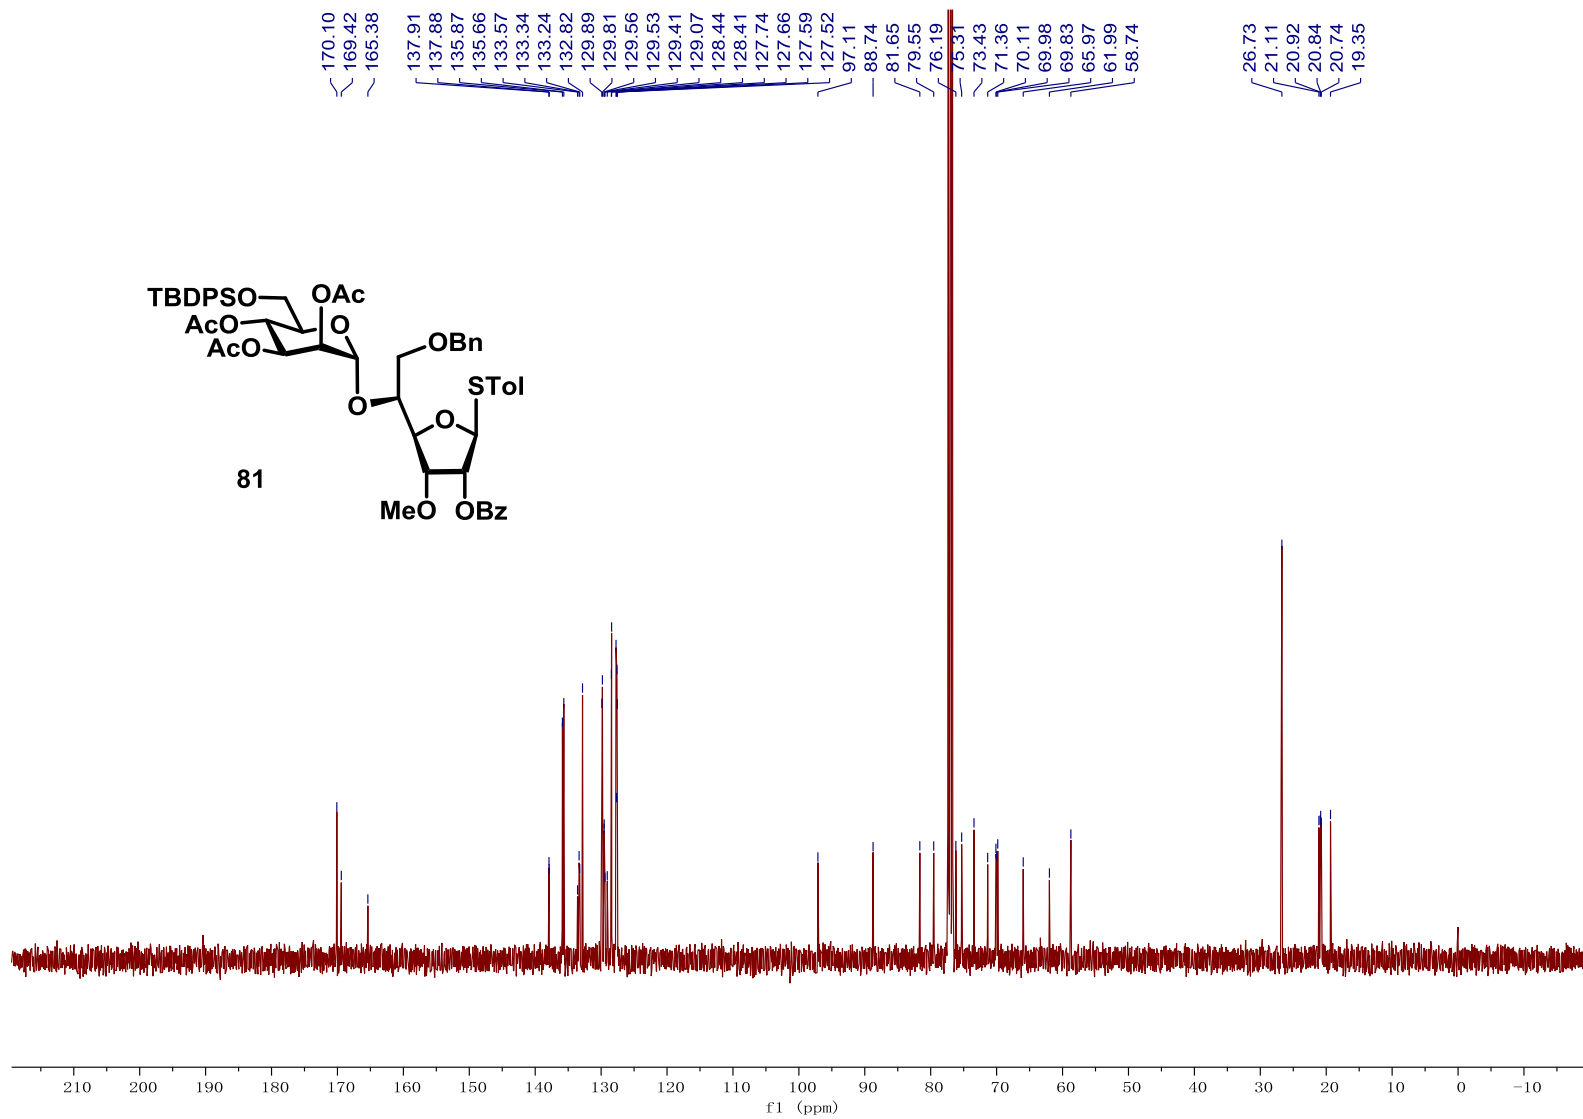

S200



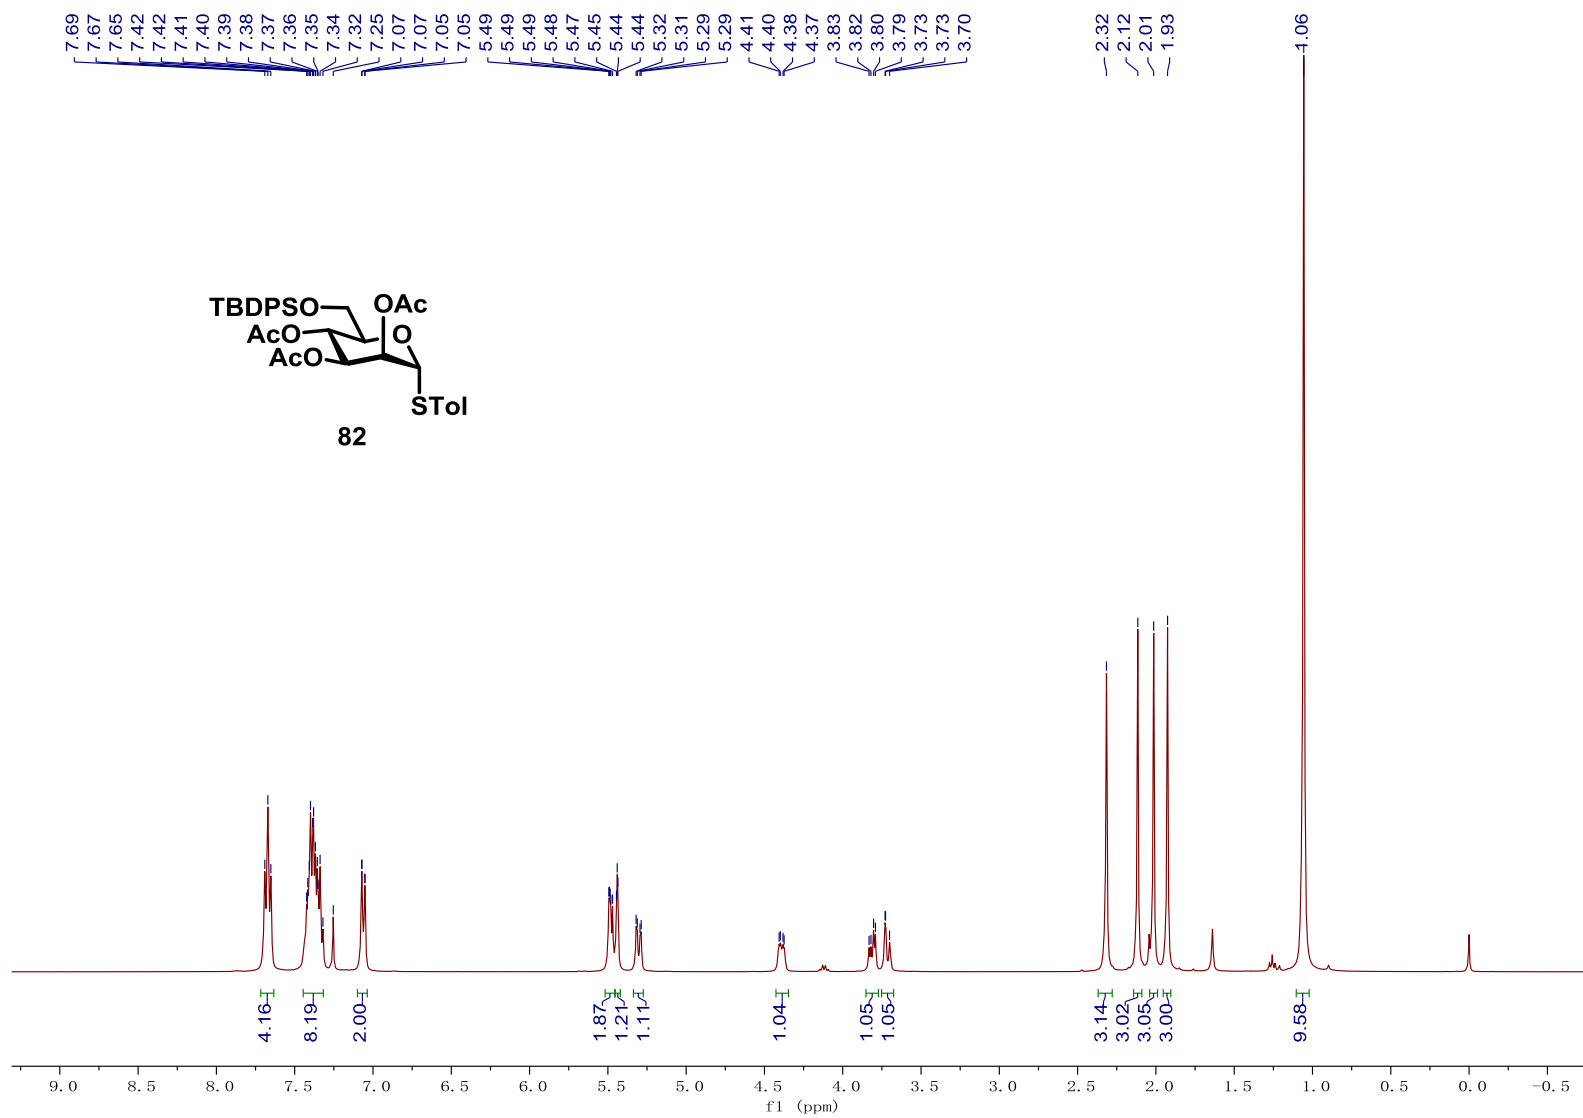

S202

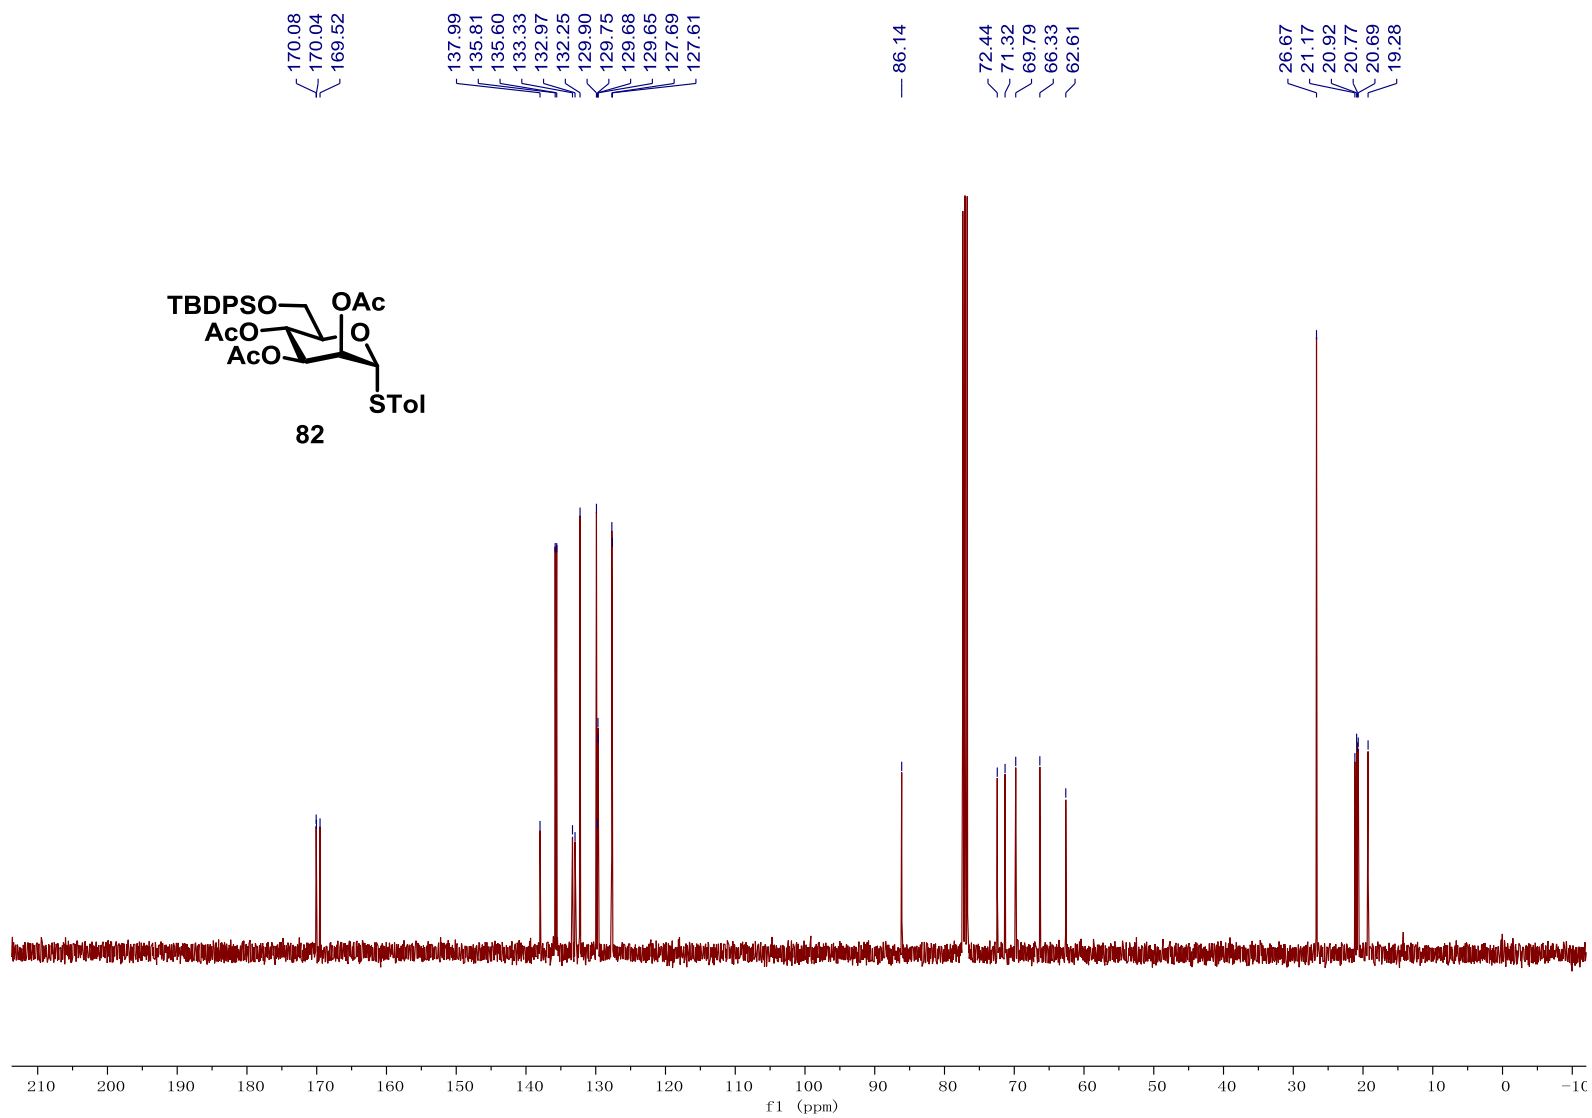

S203

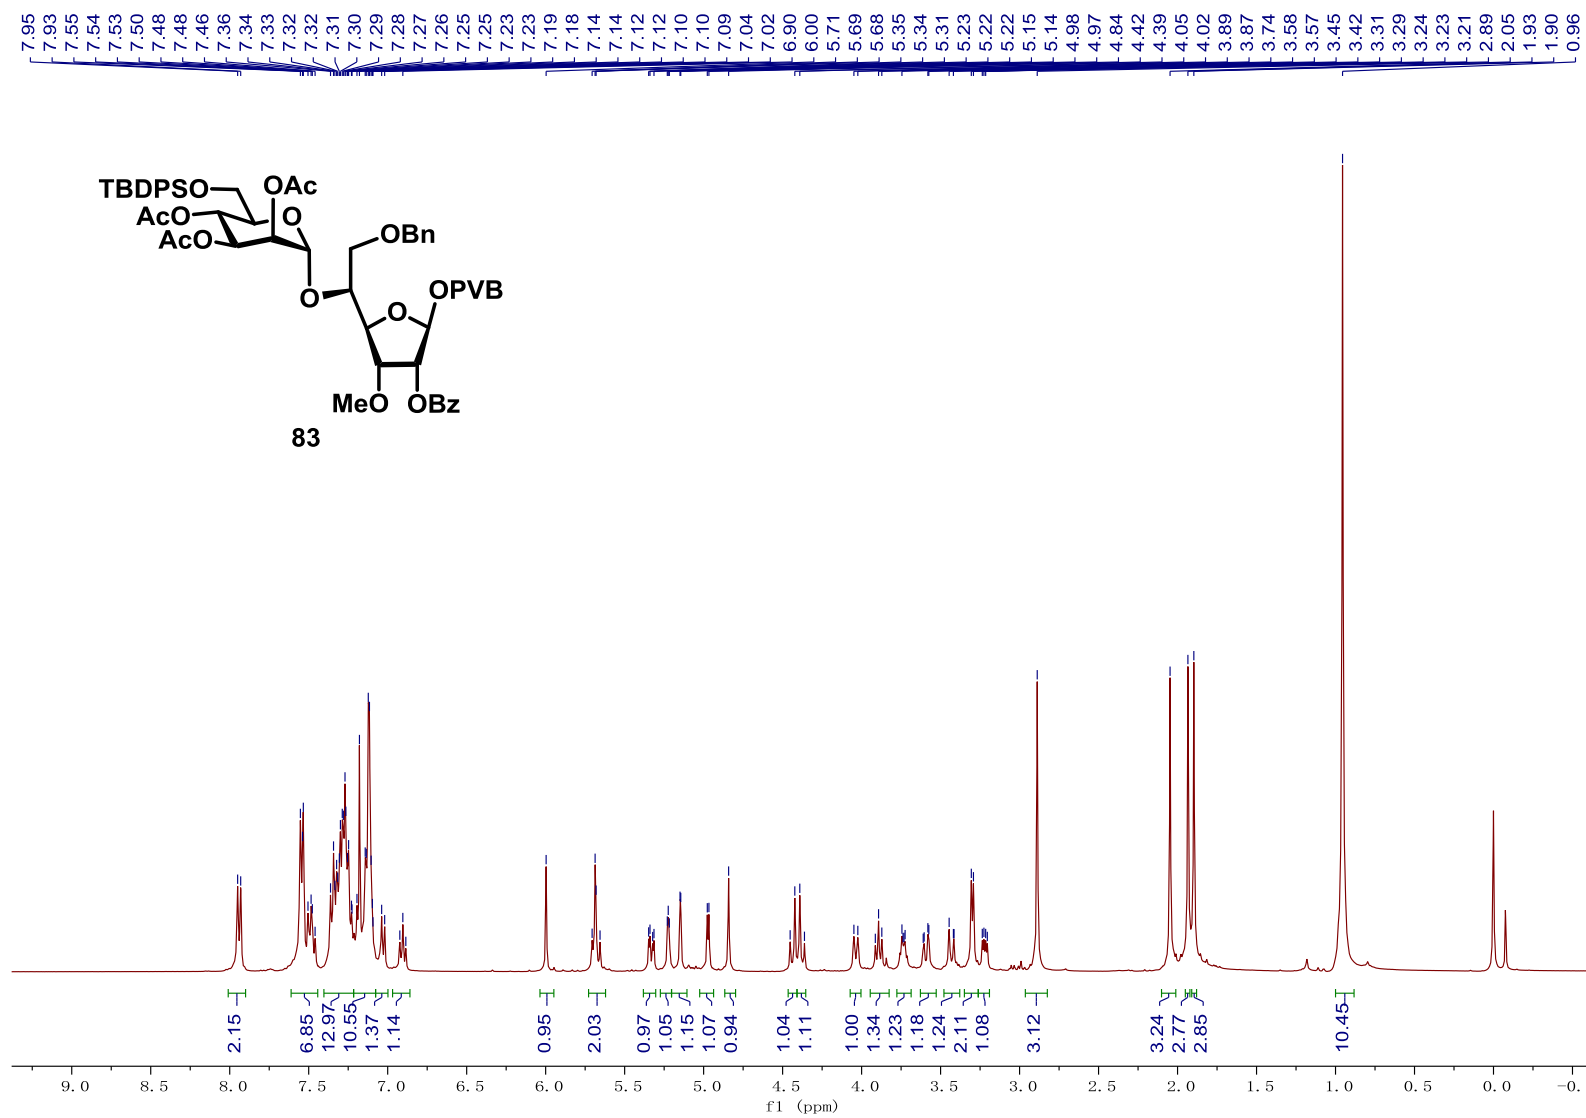

S204





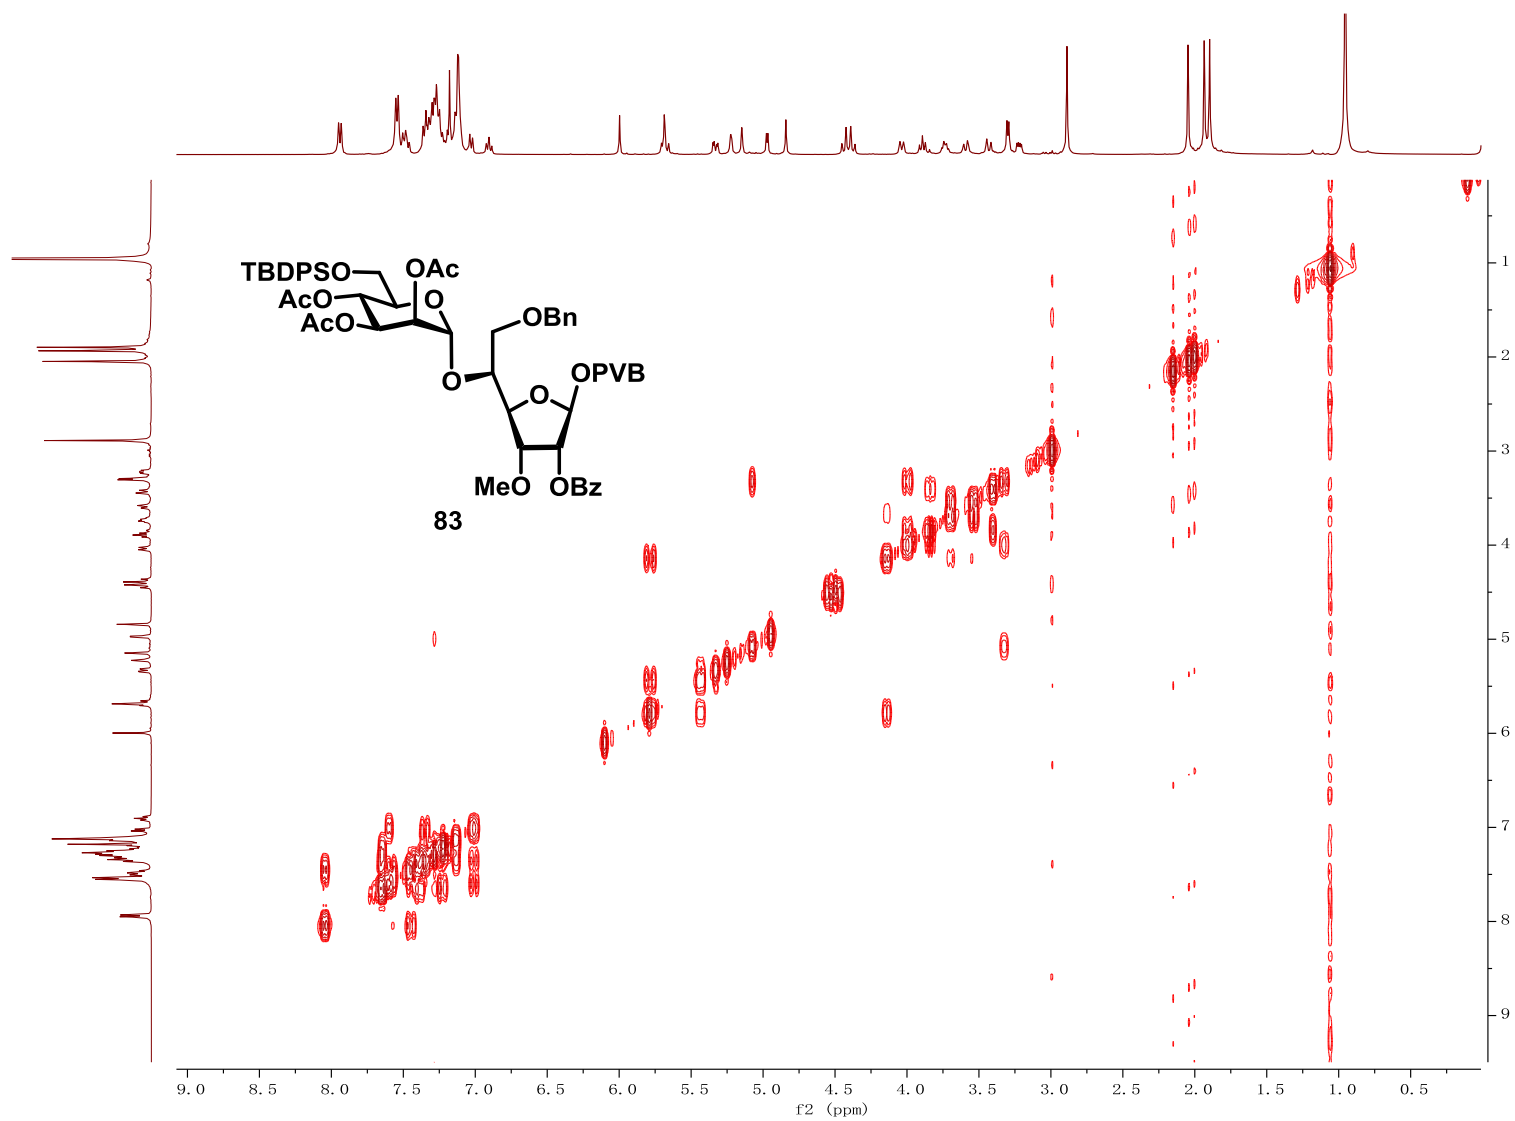

S206

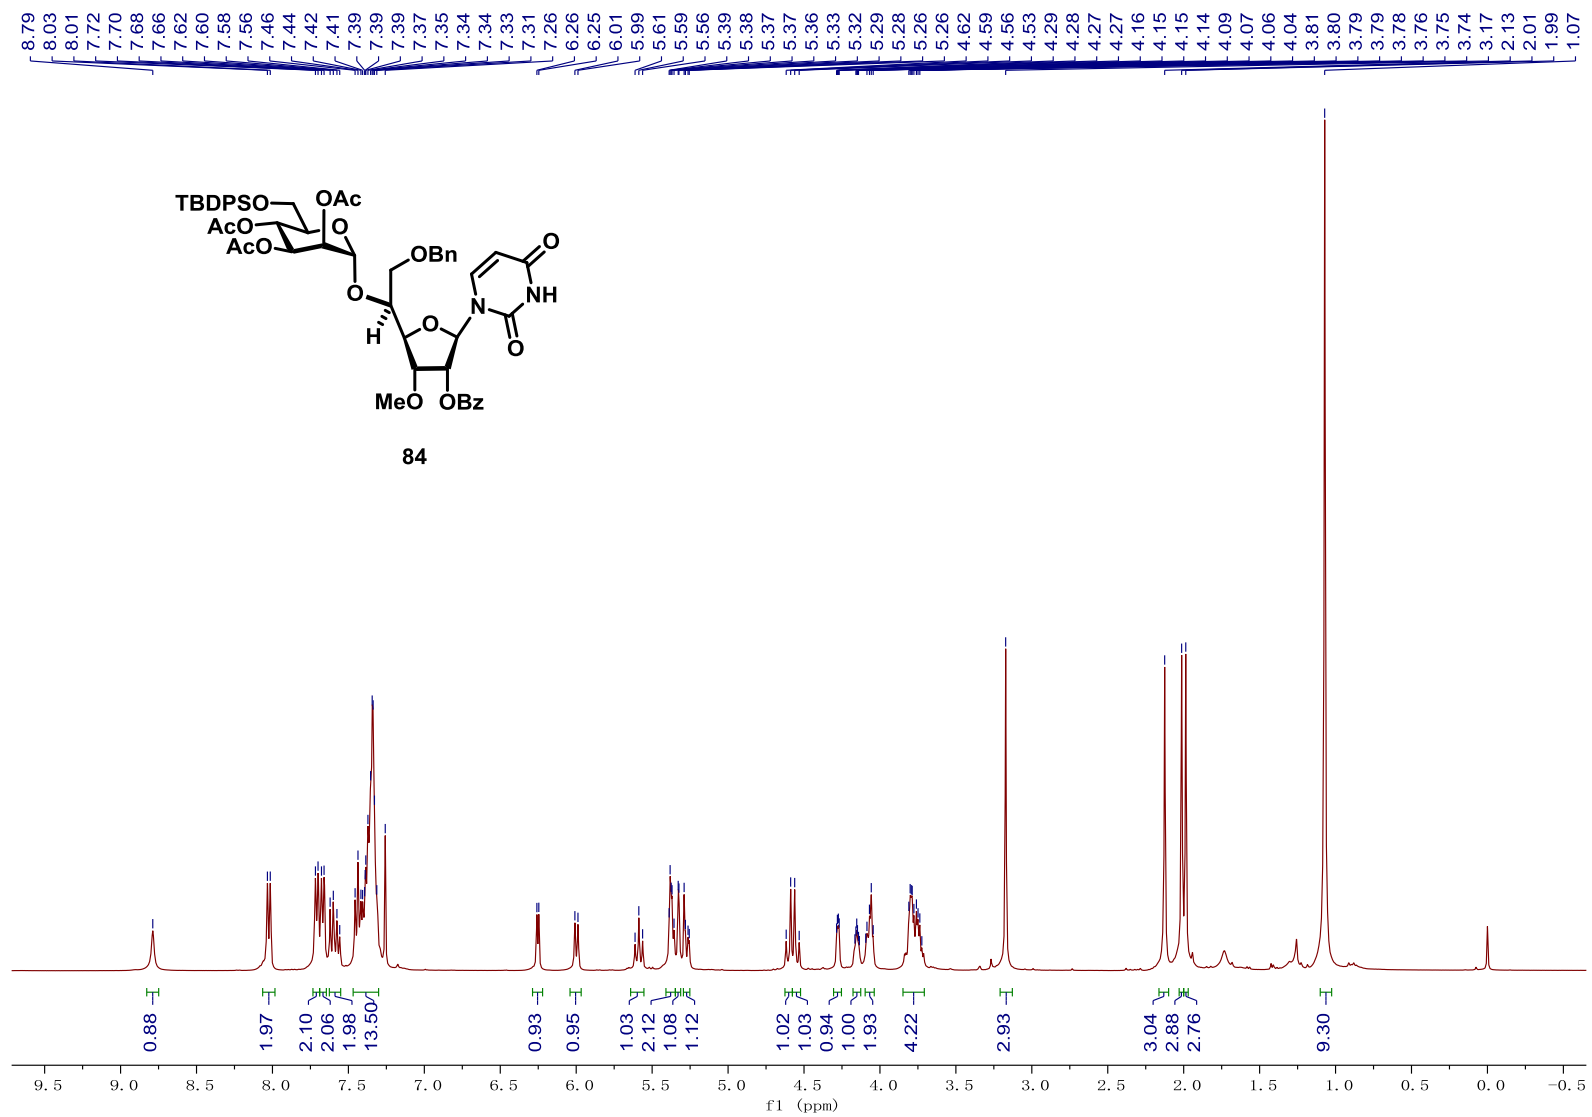

S207

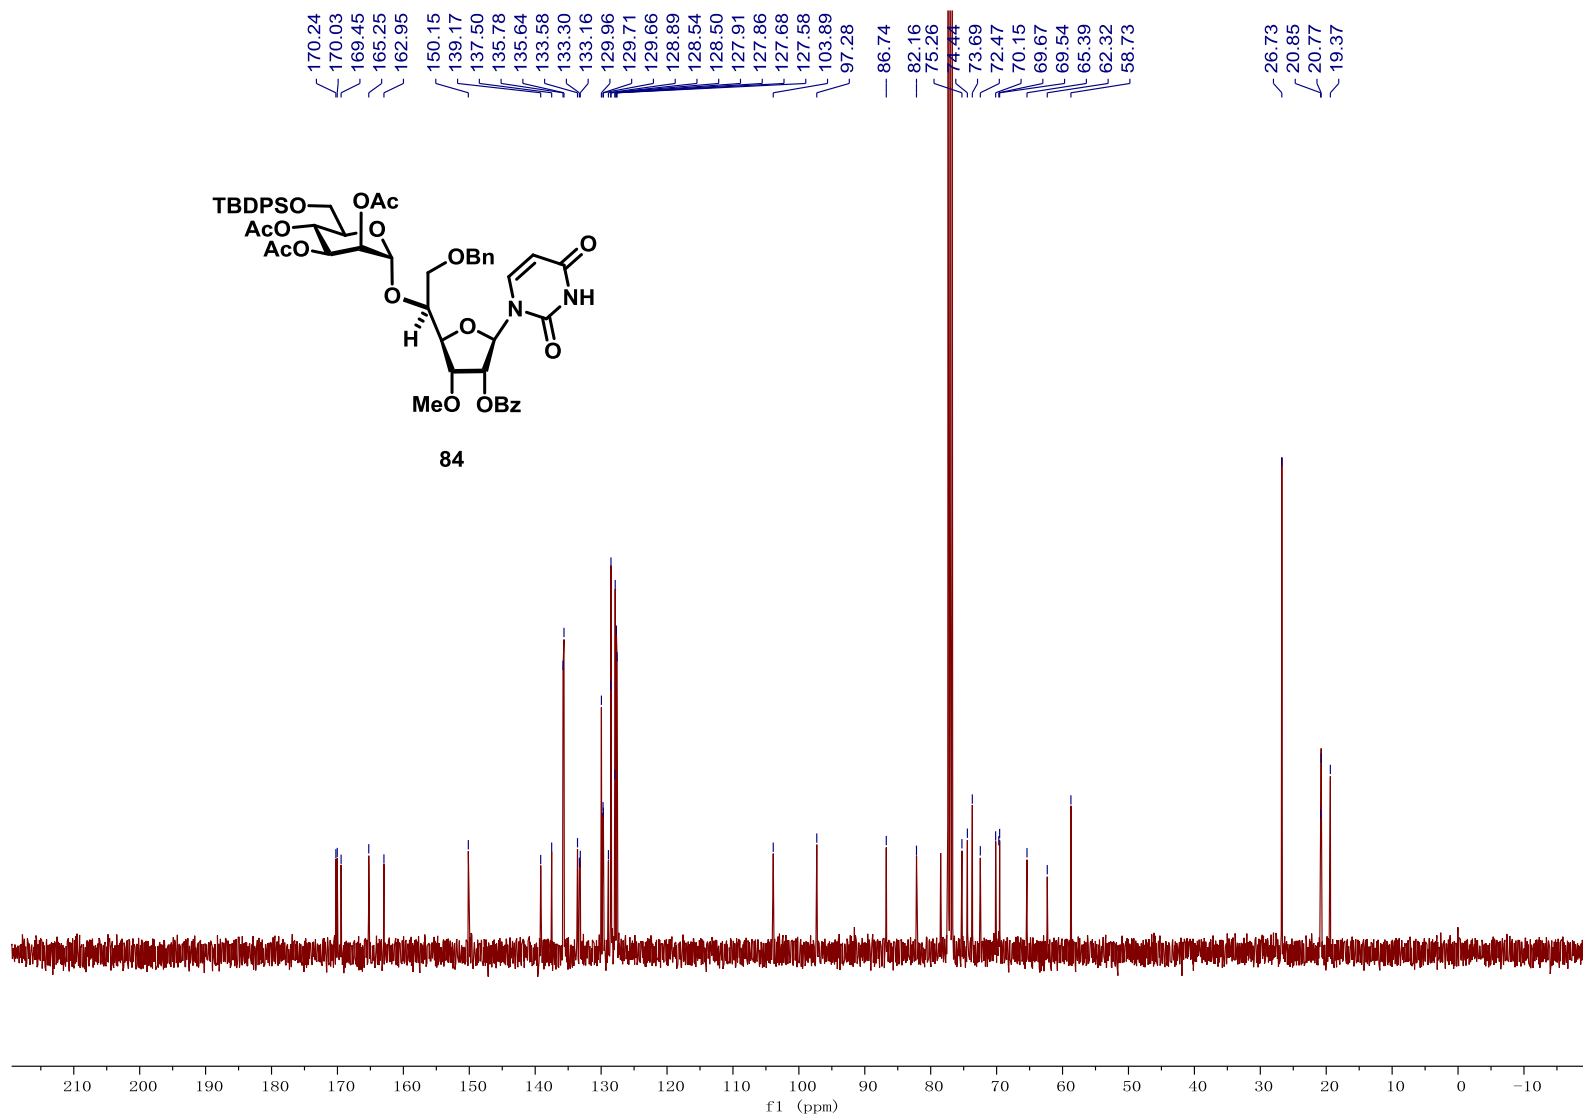

S208

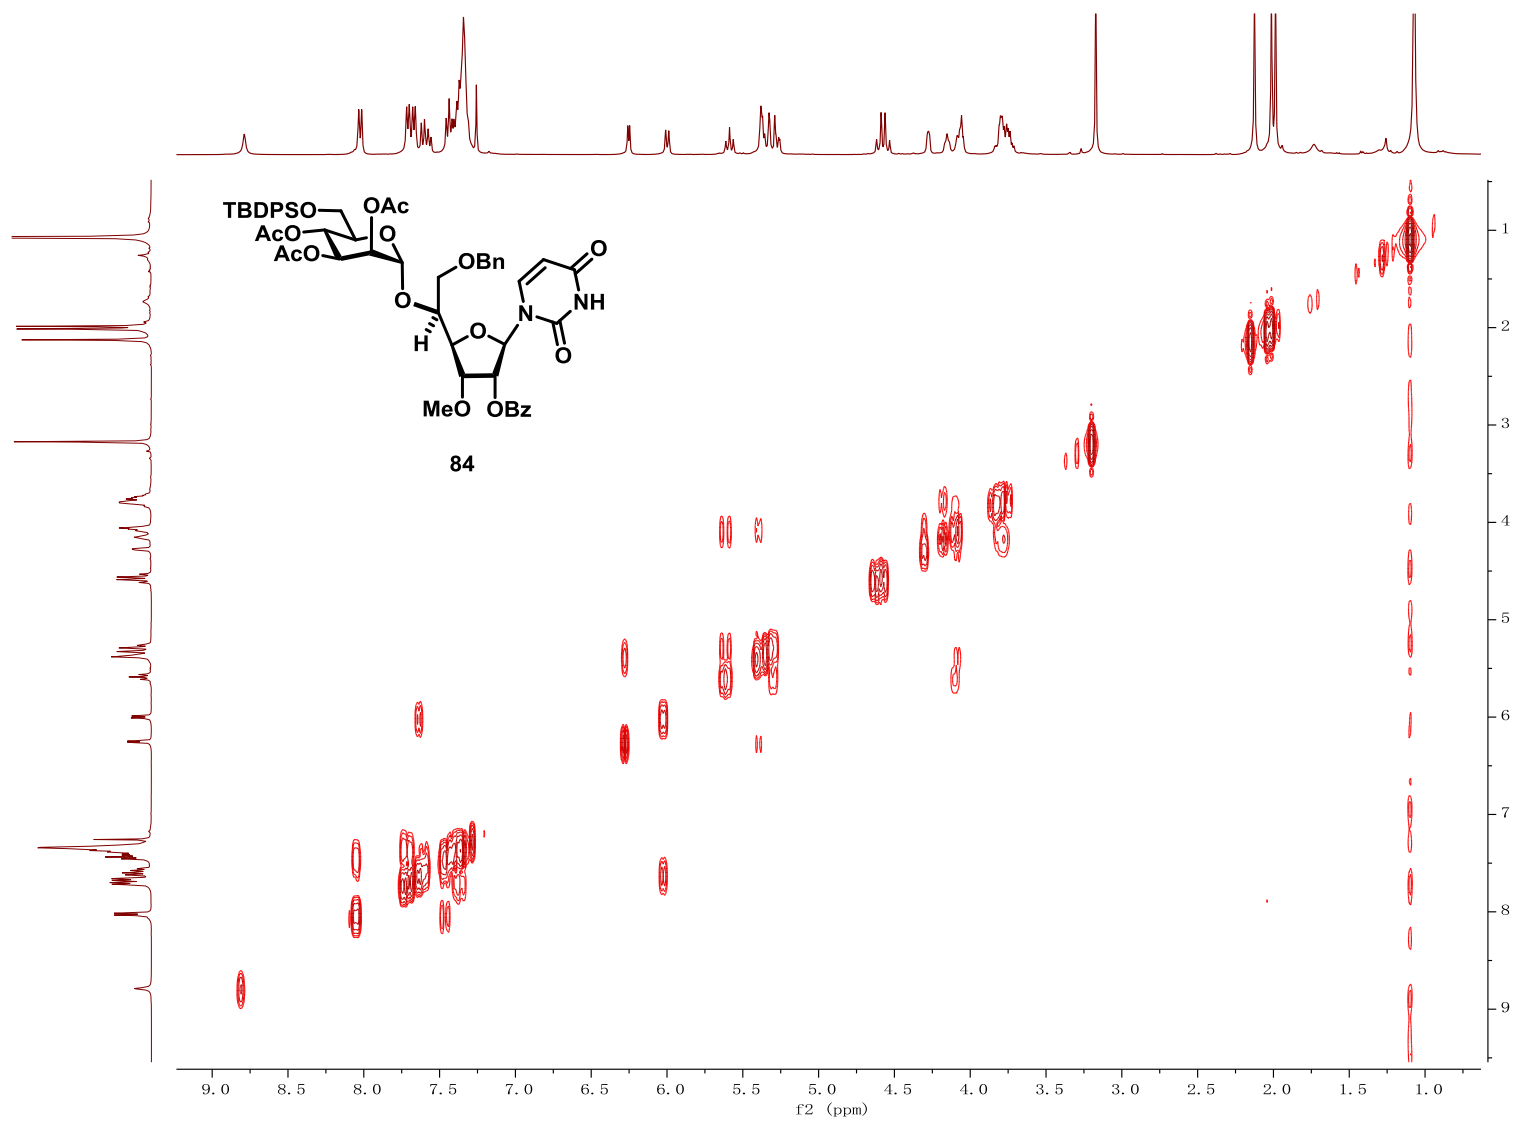

S209

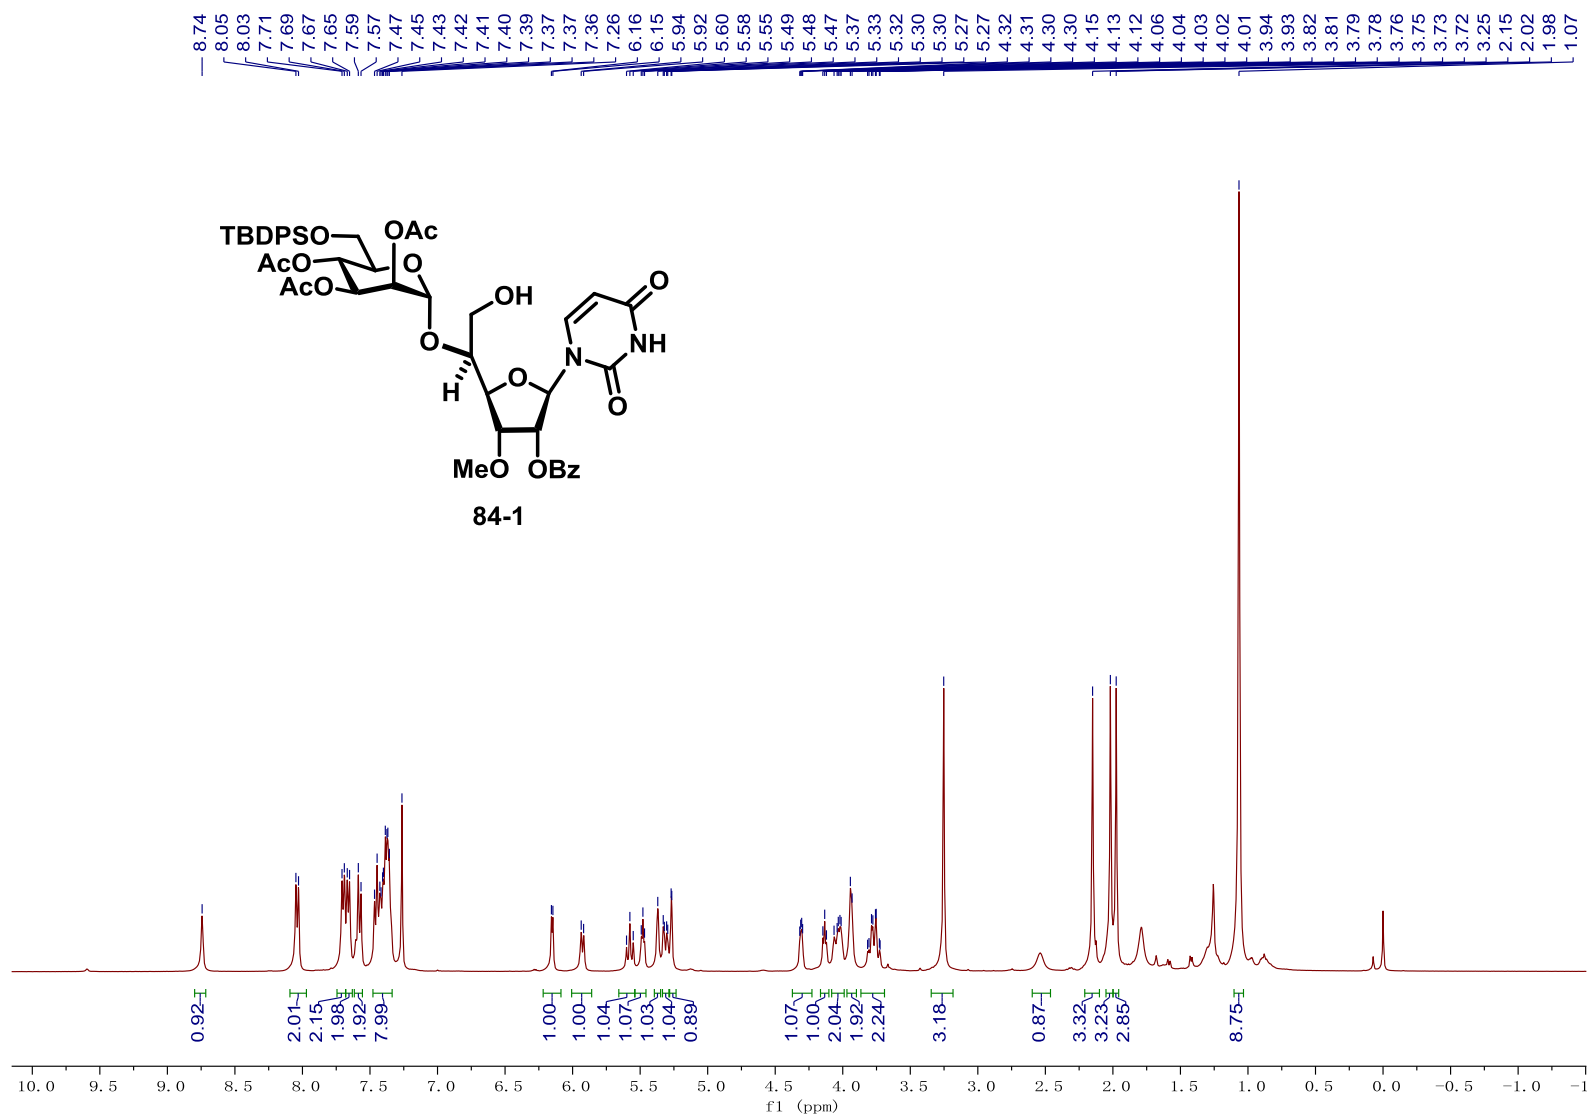

S210

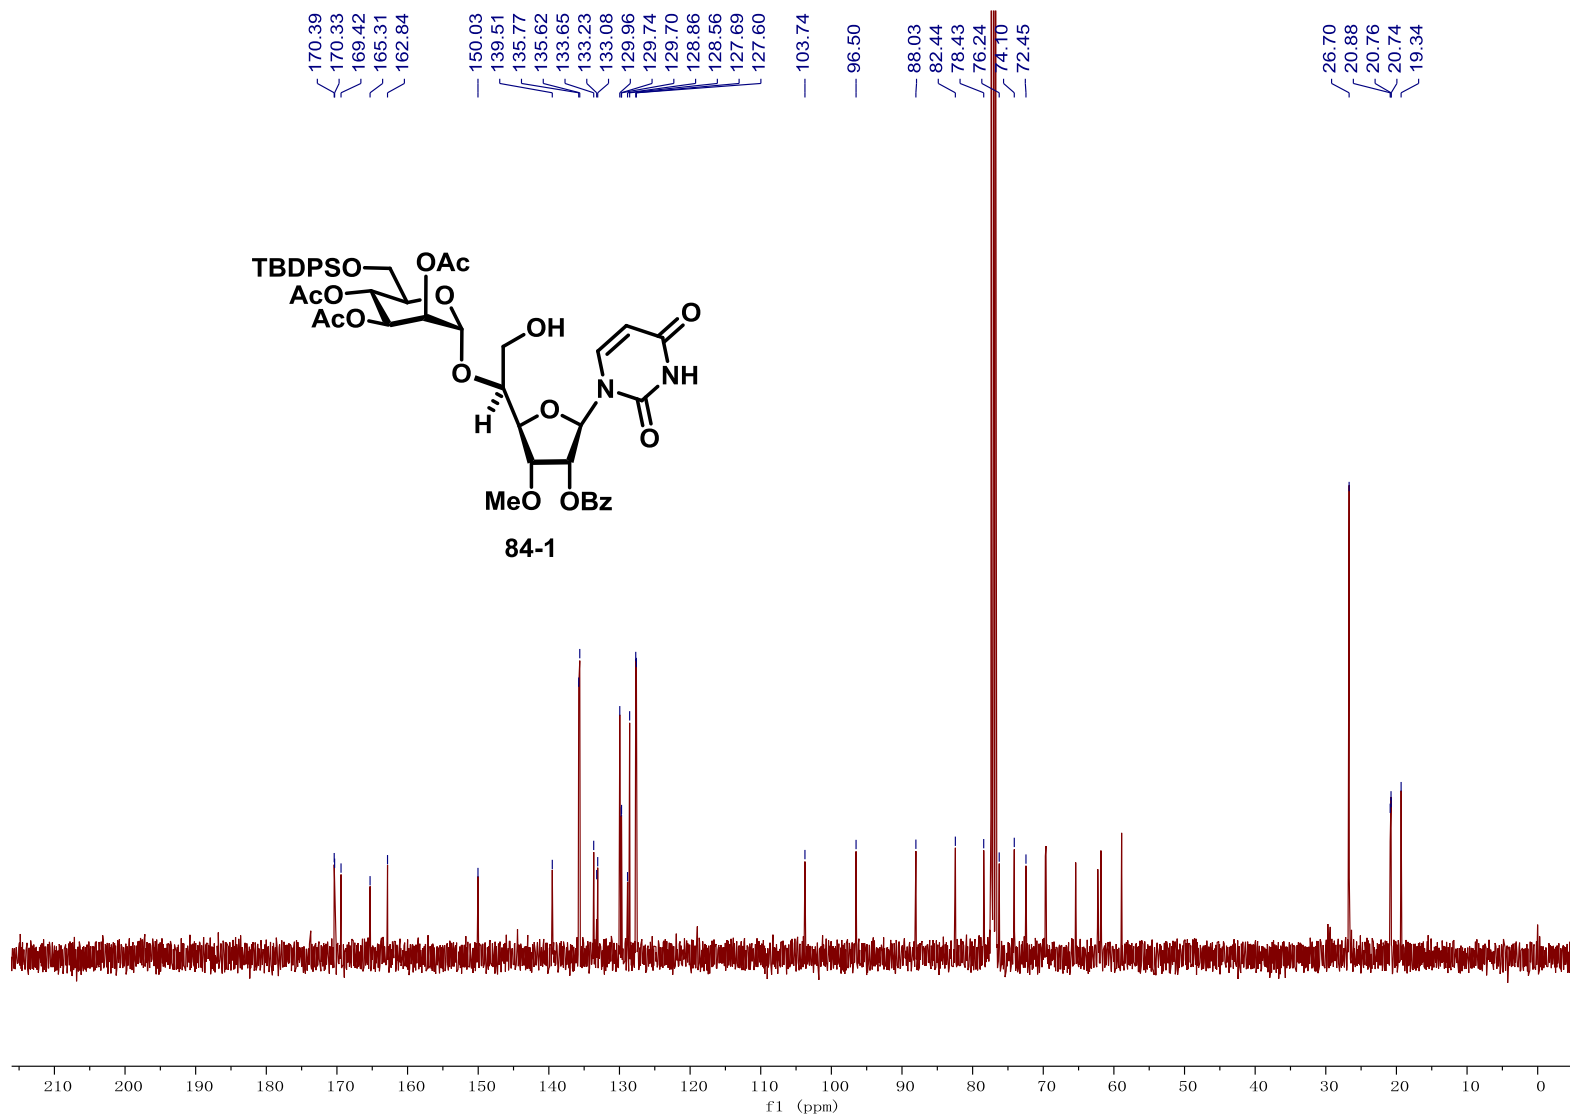

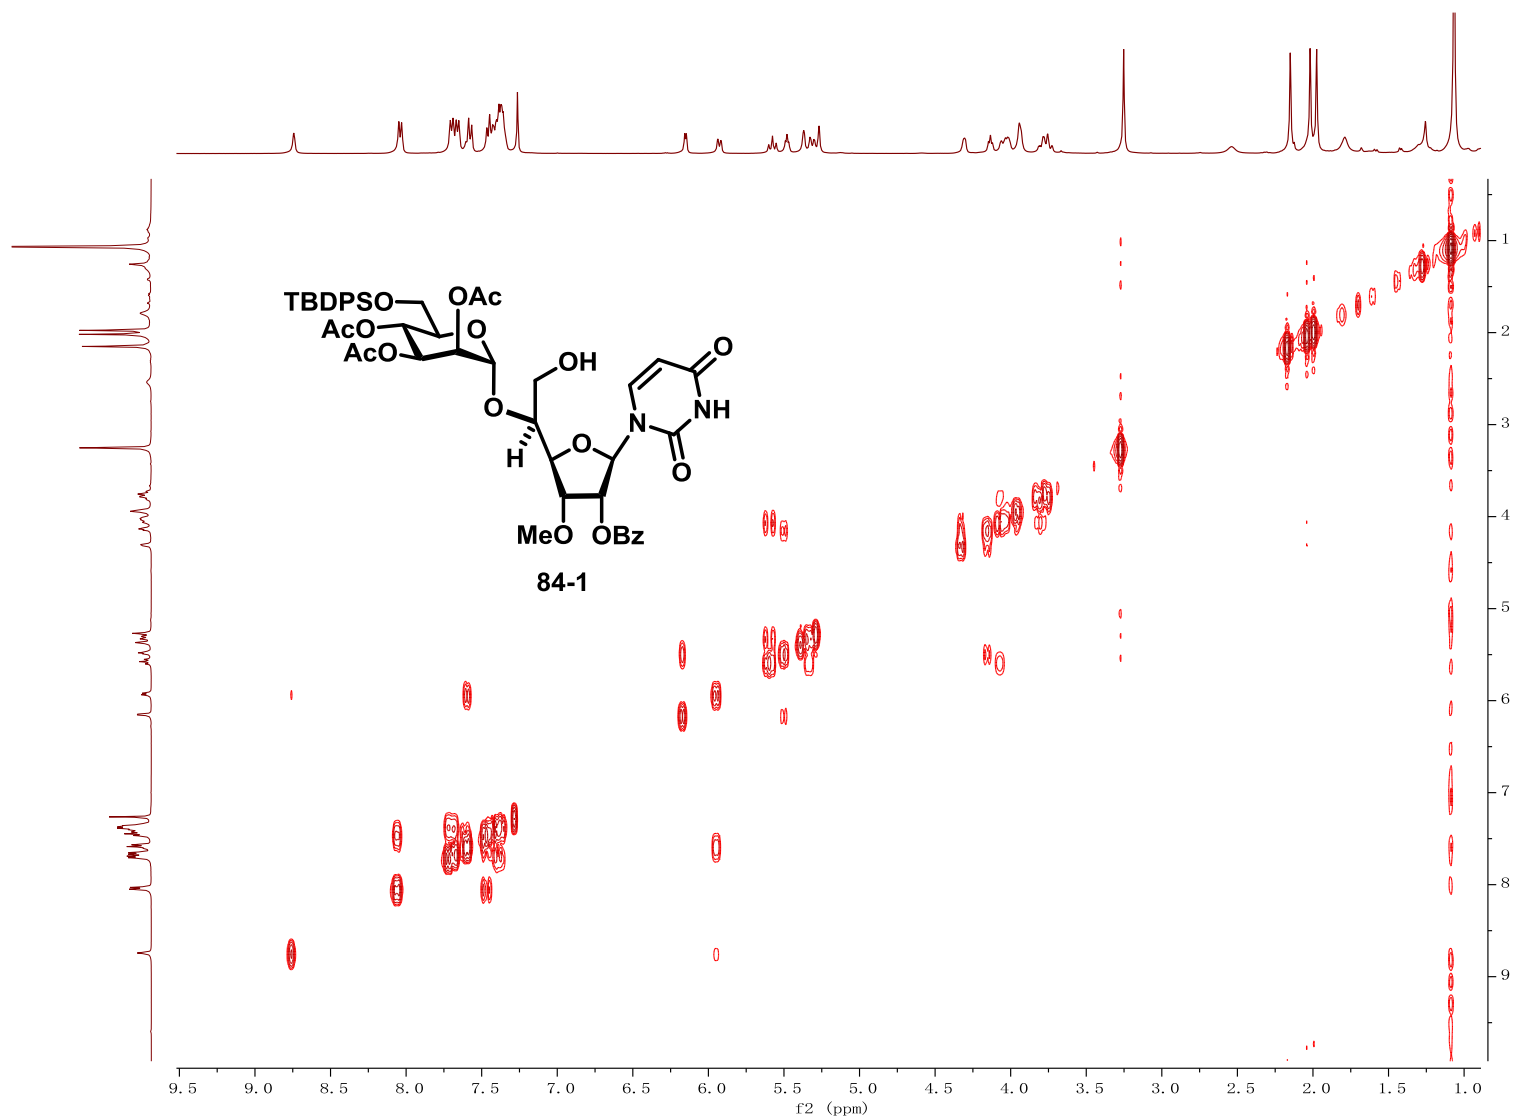

S212



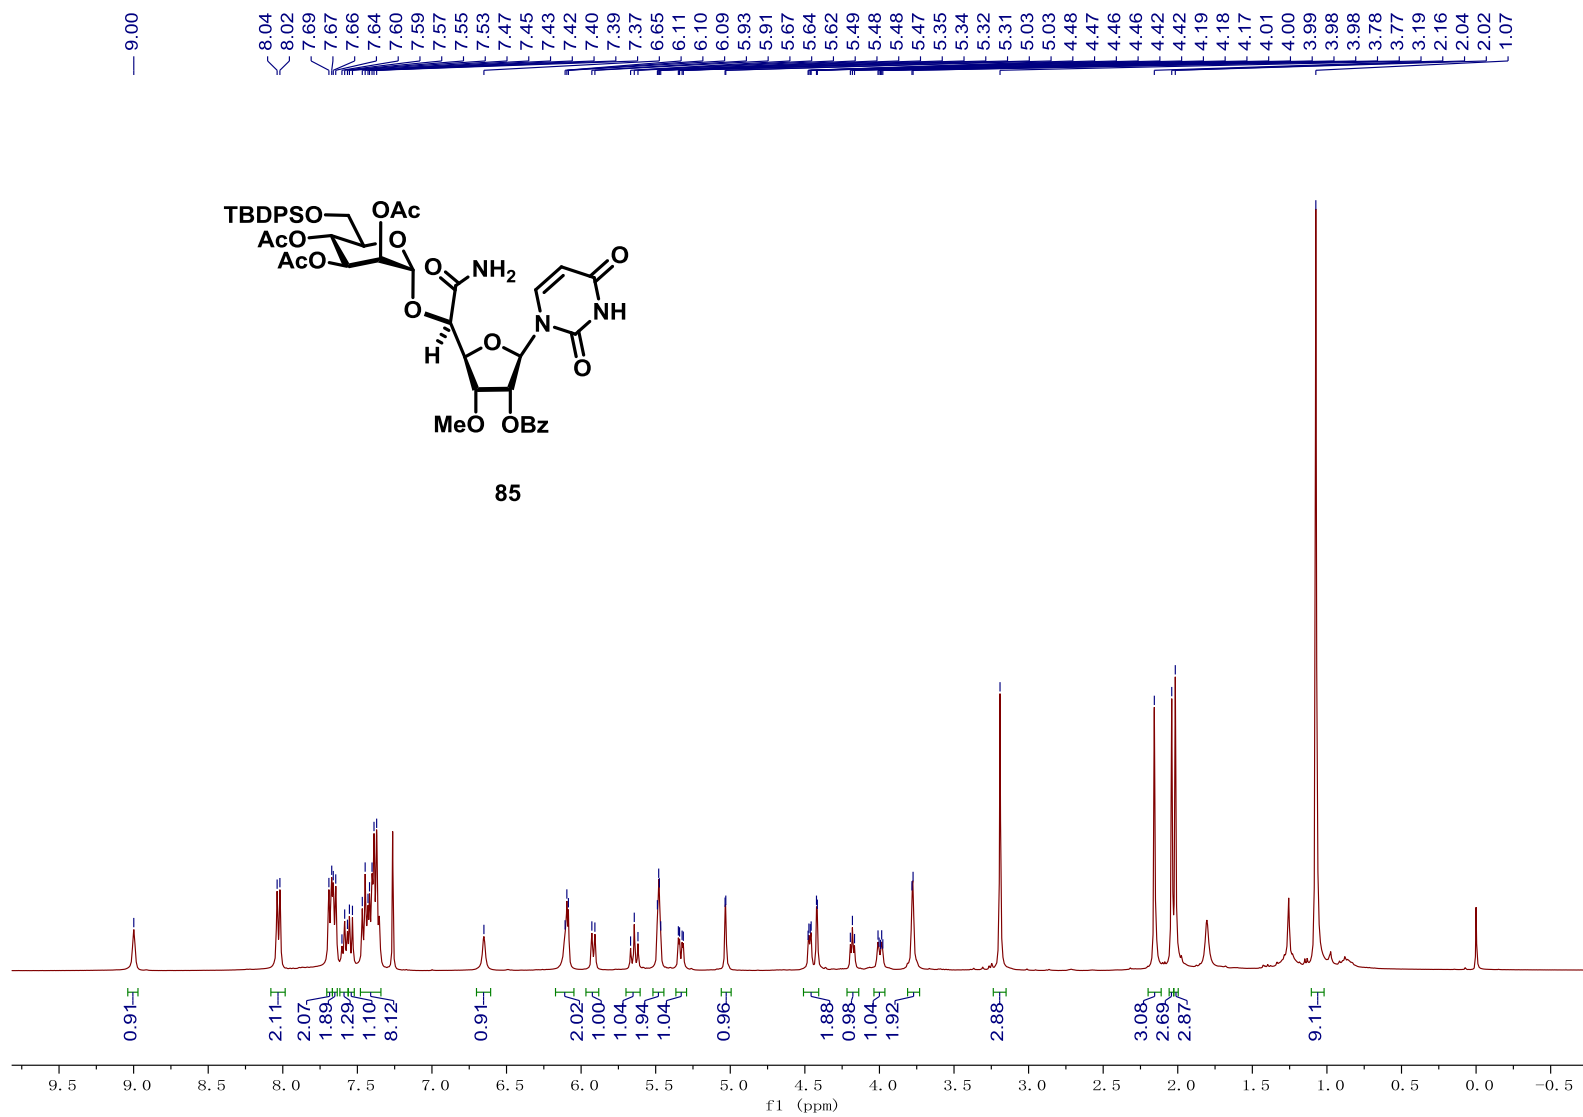

S213

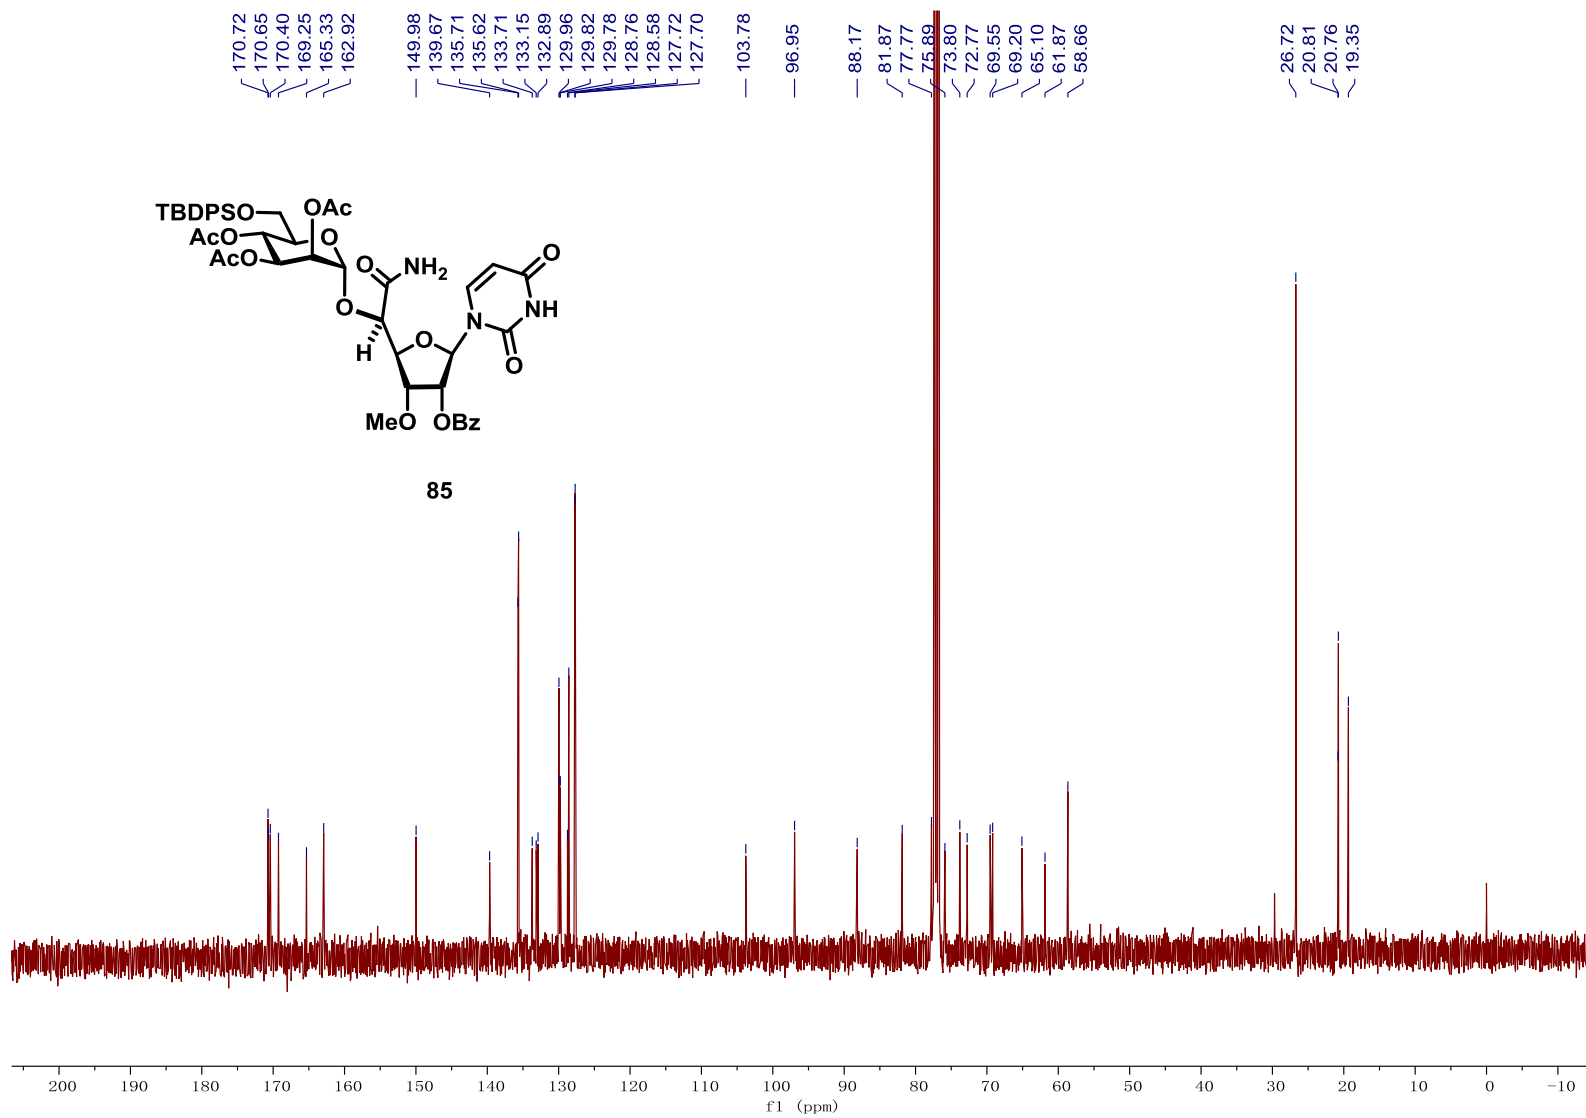

S214

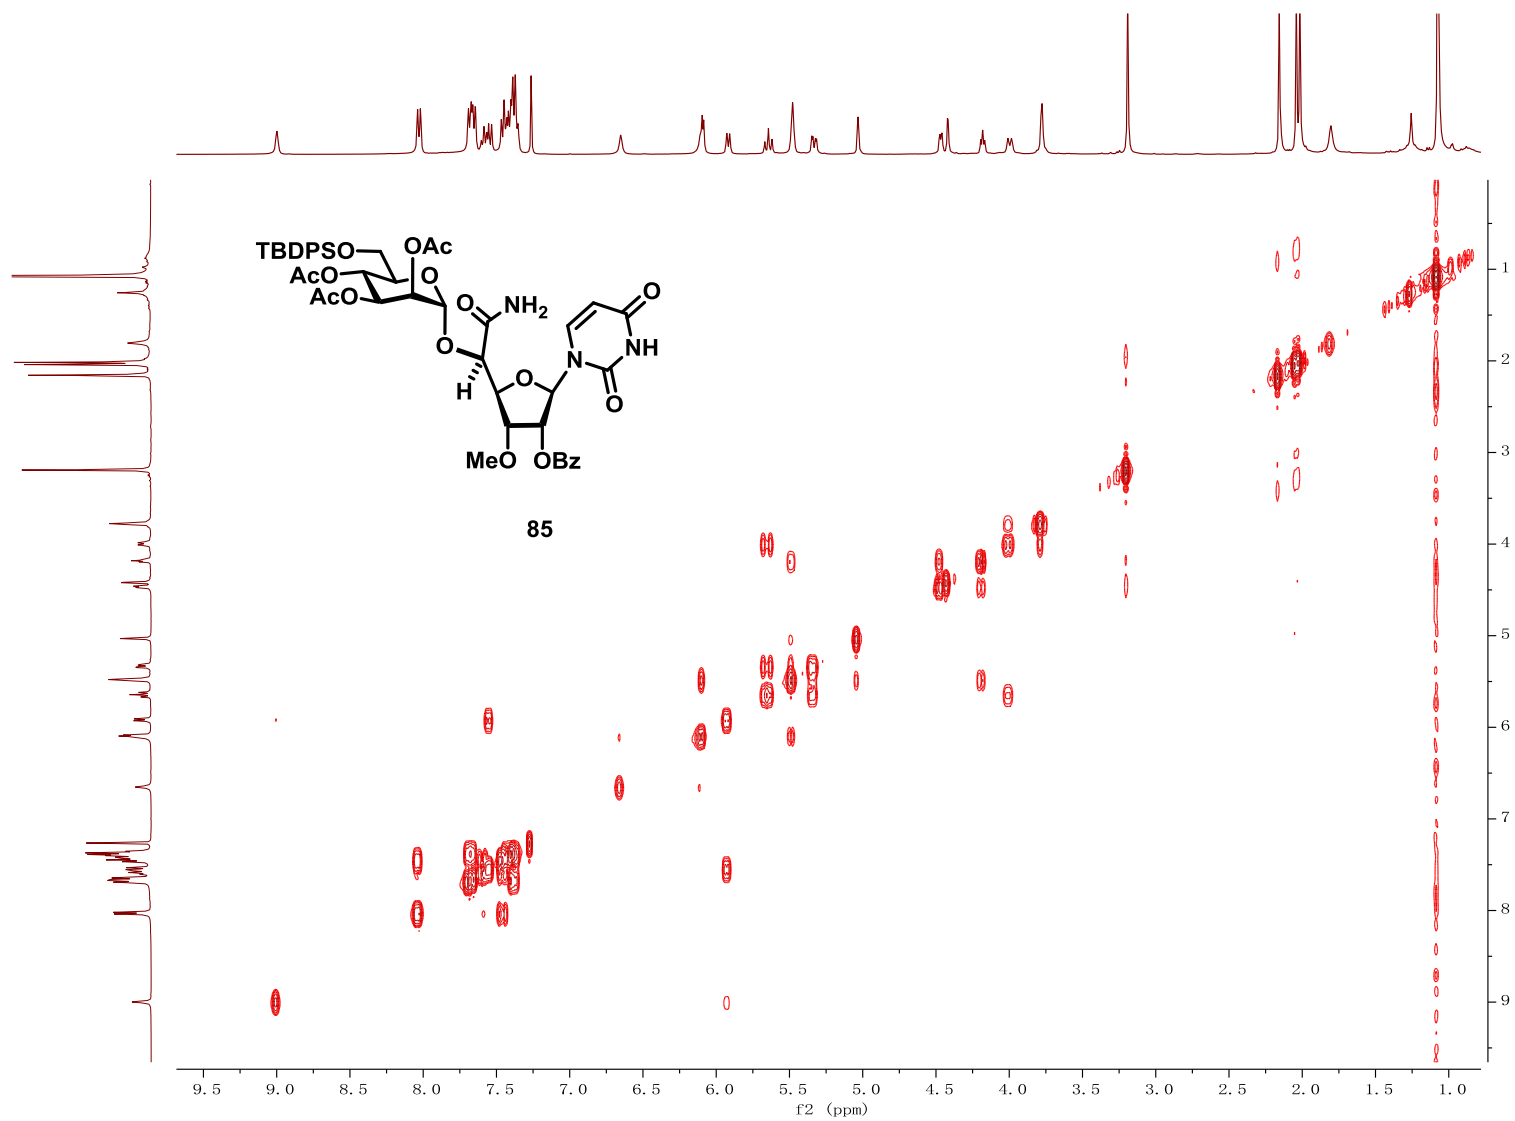

S215

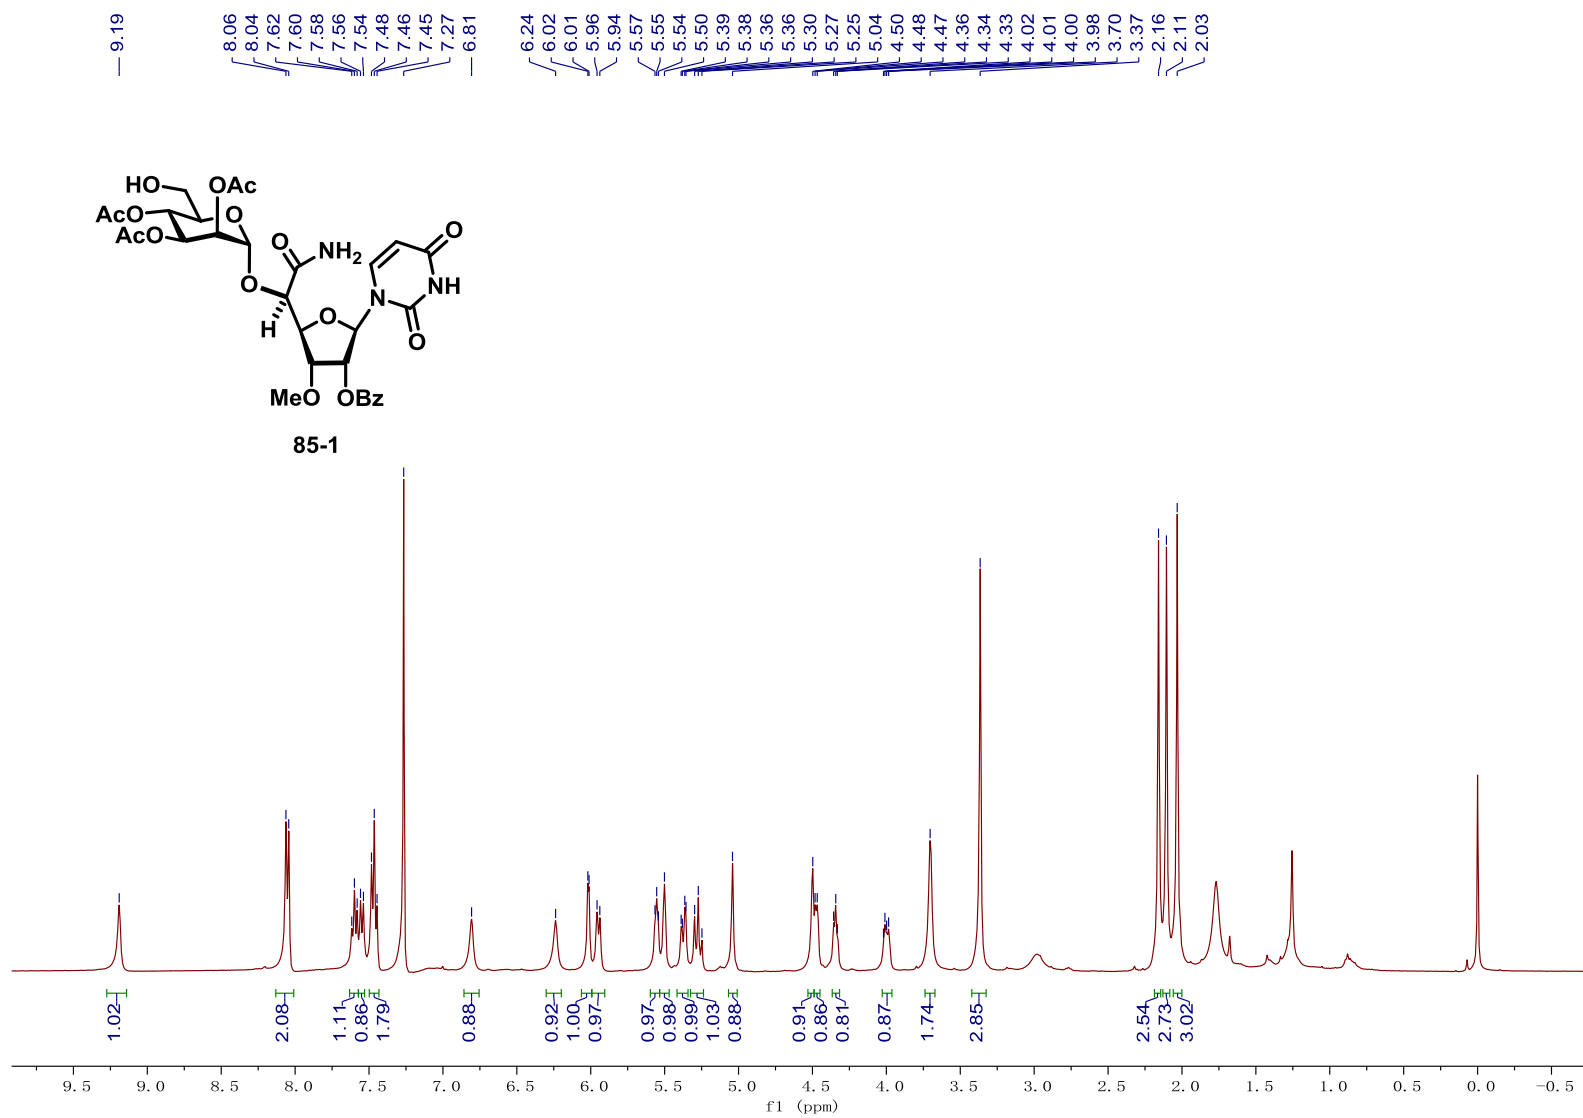

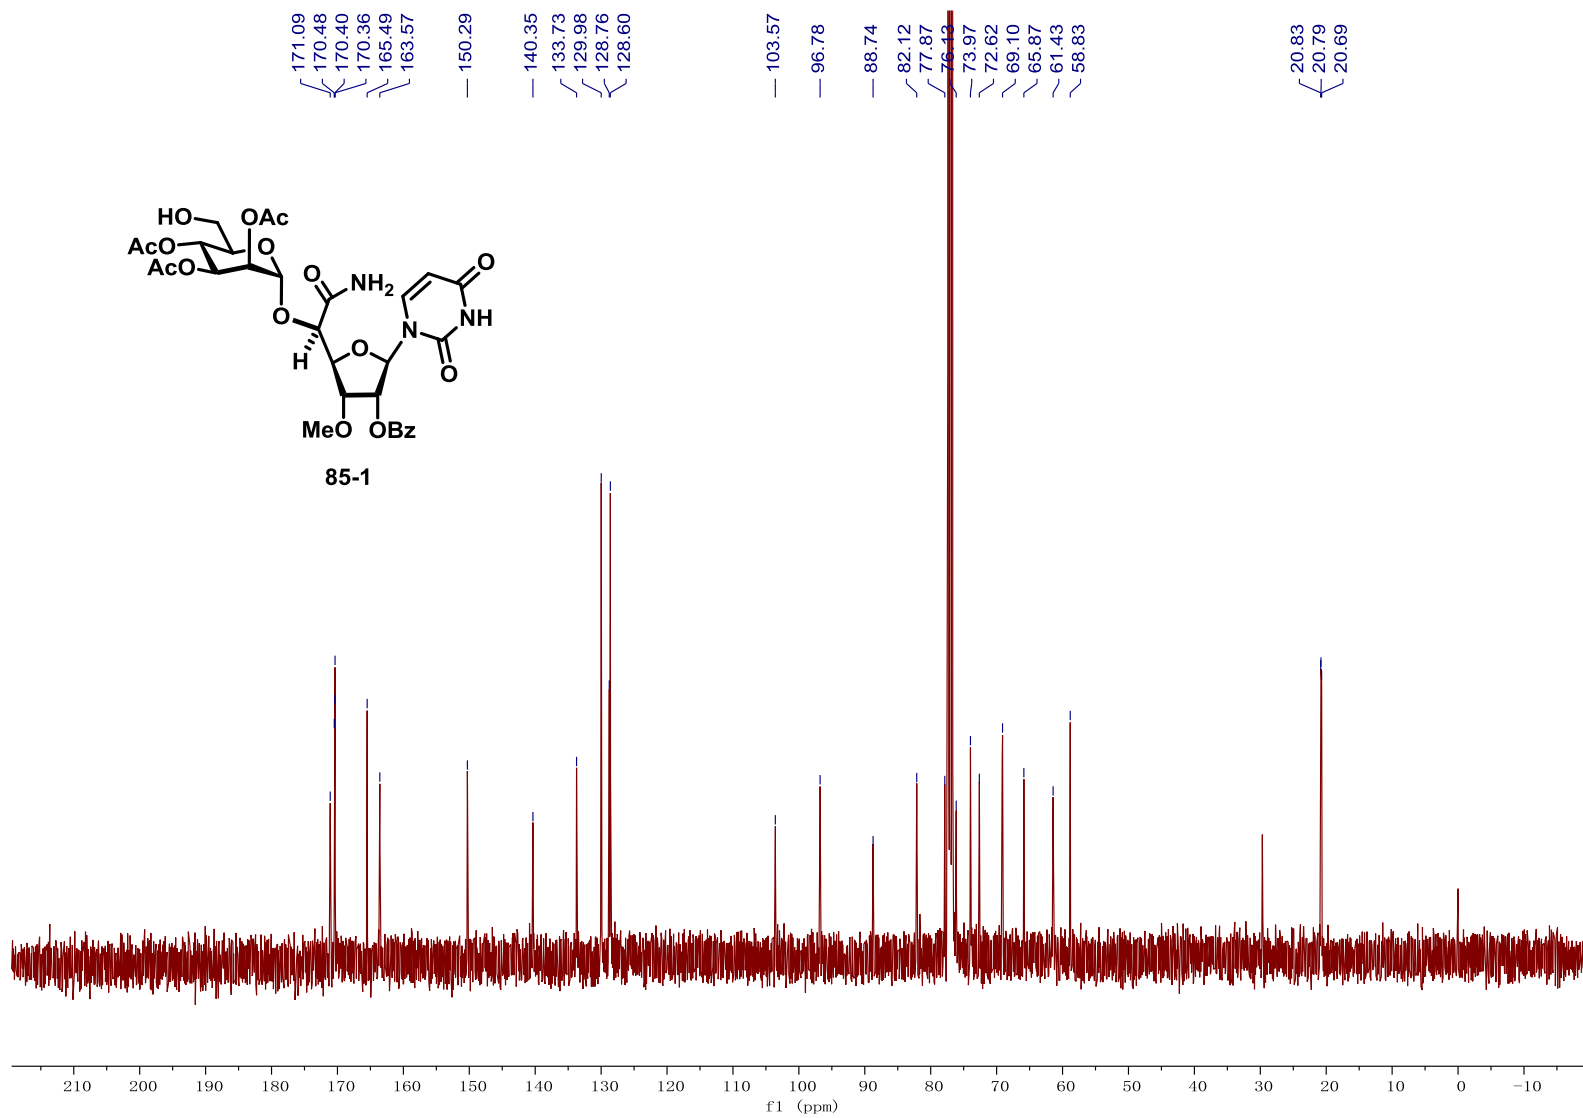

S217

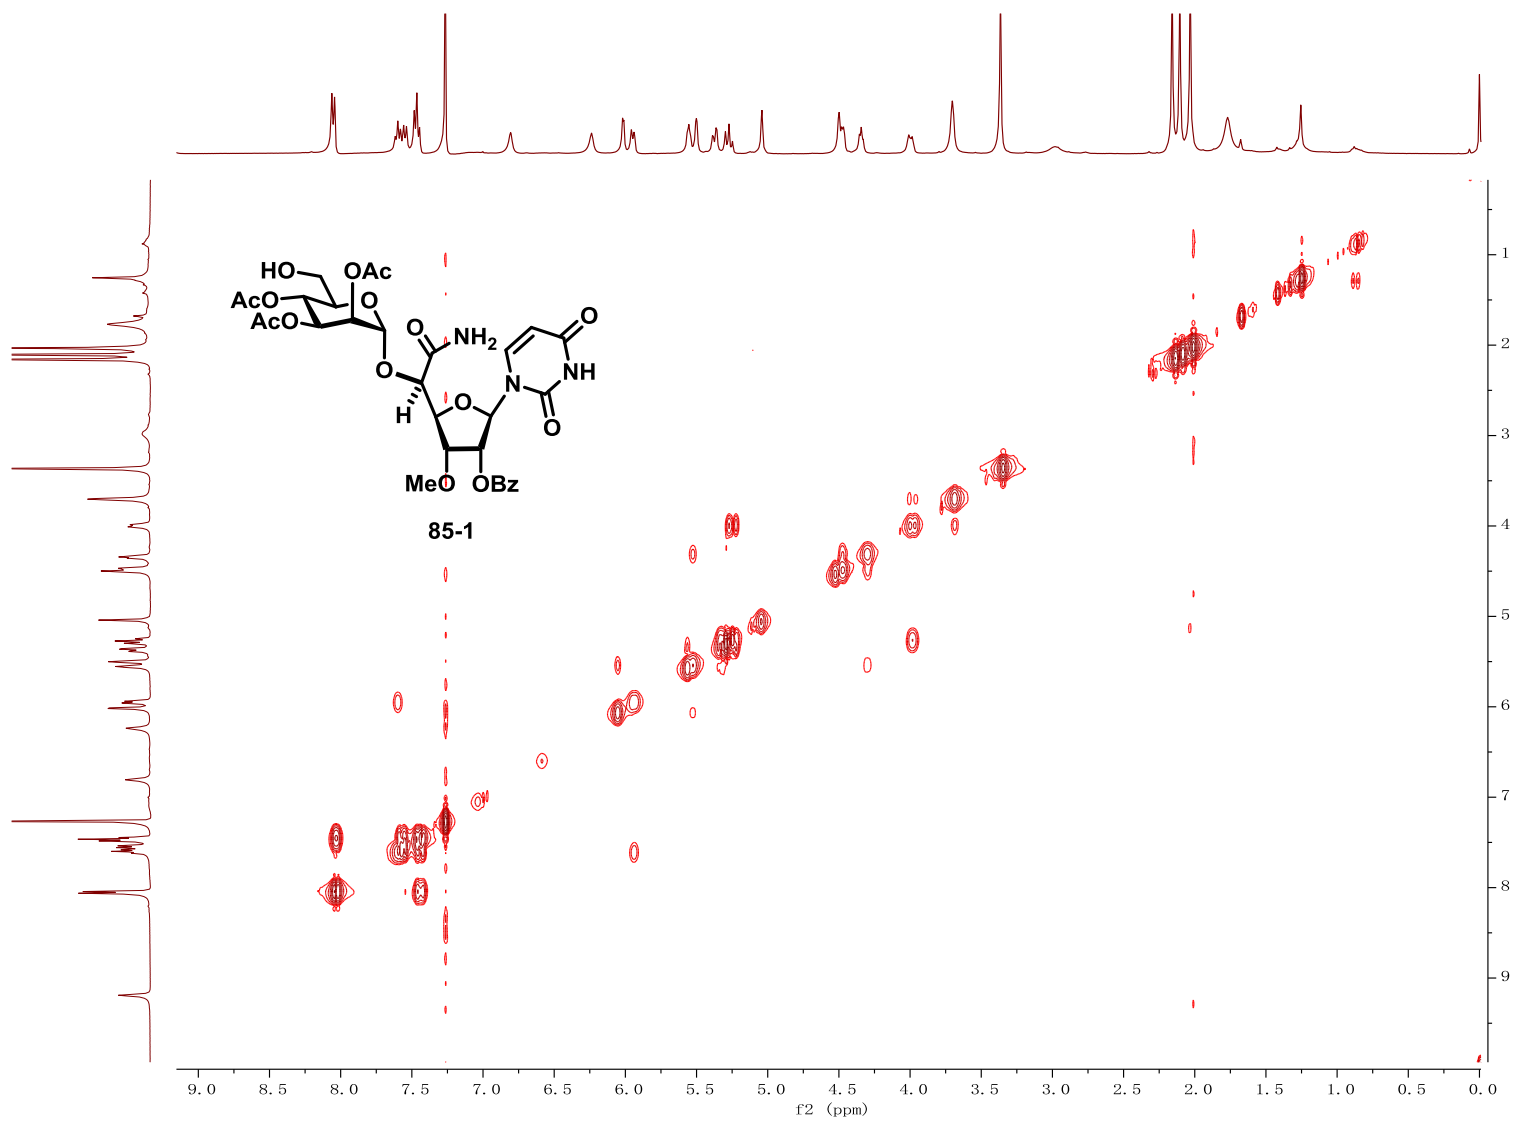

S218

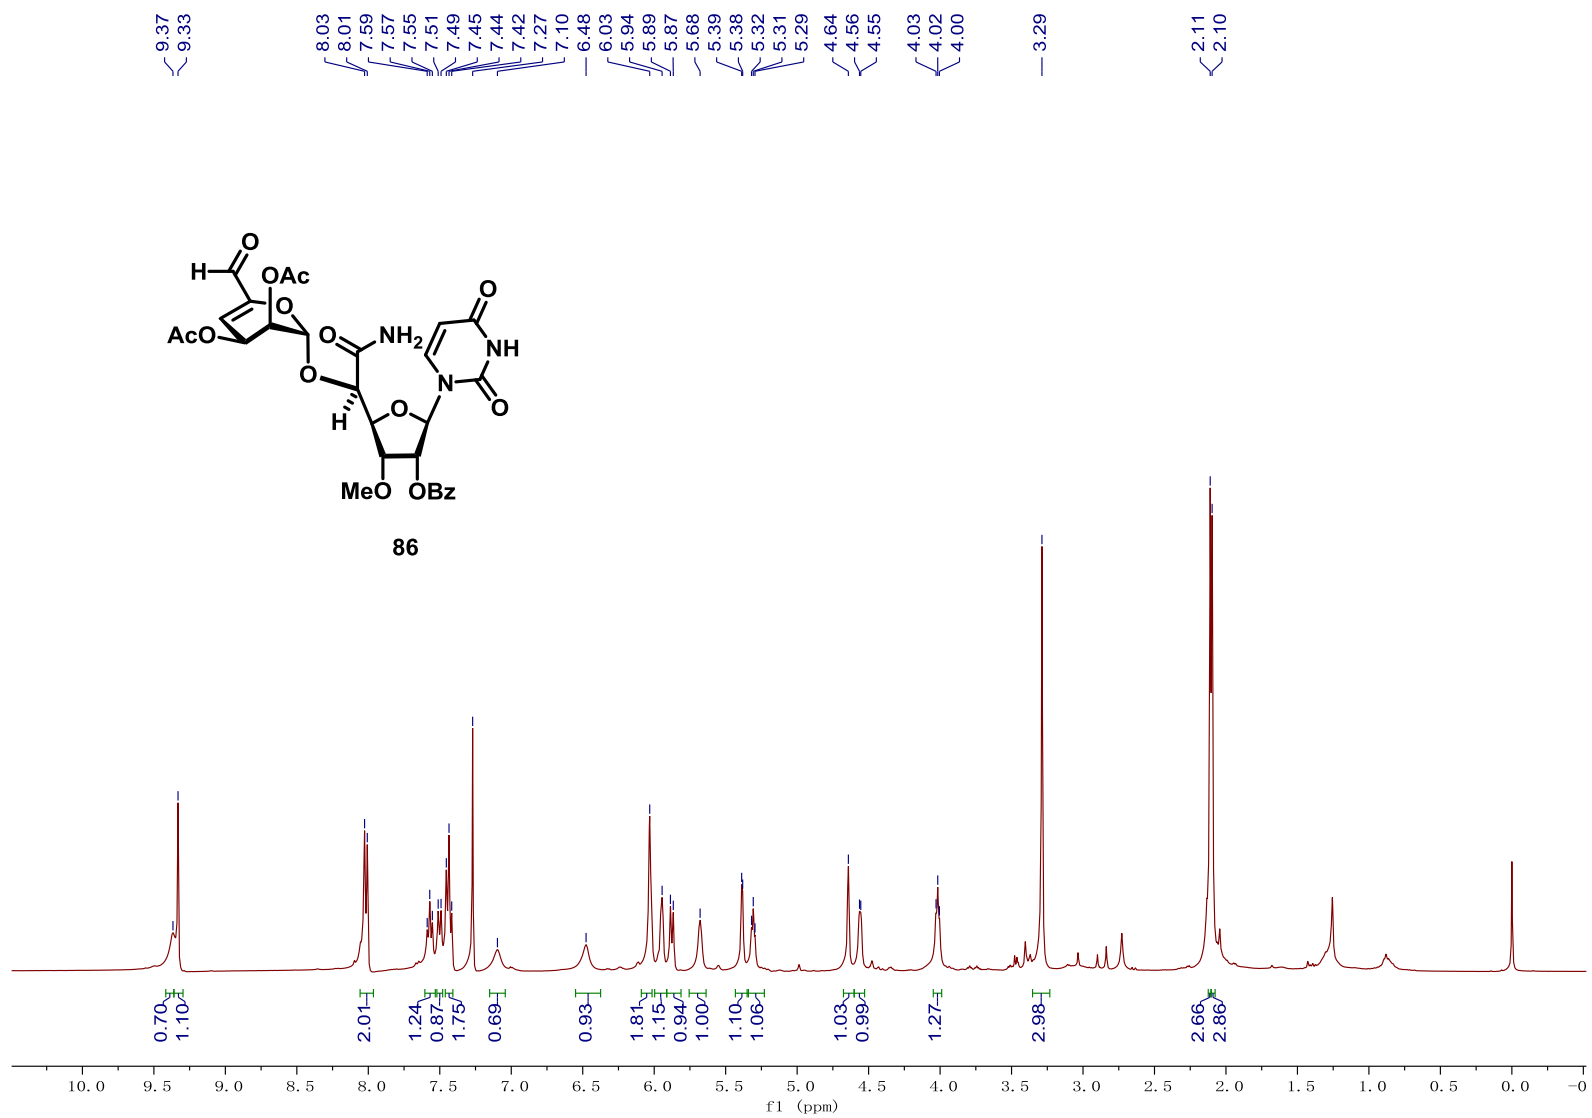

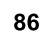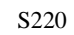



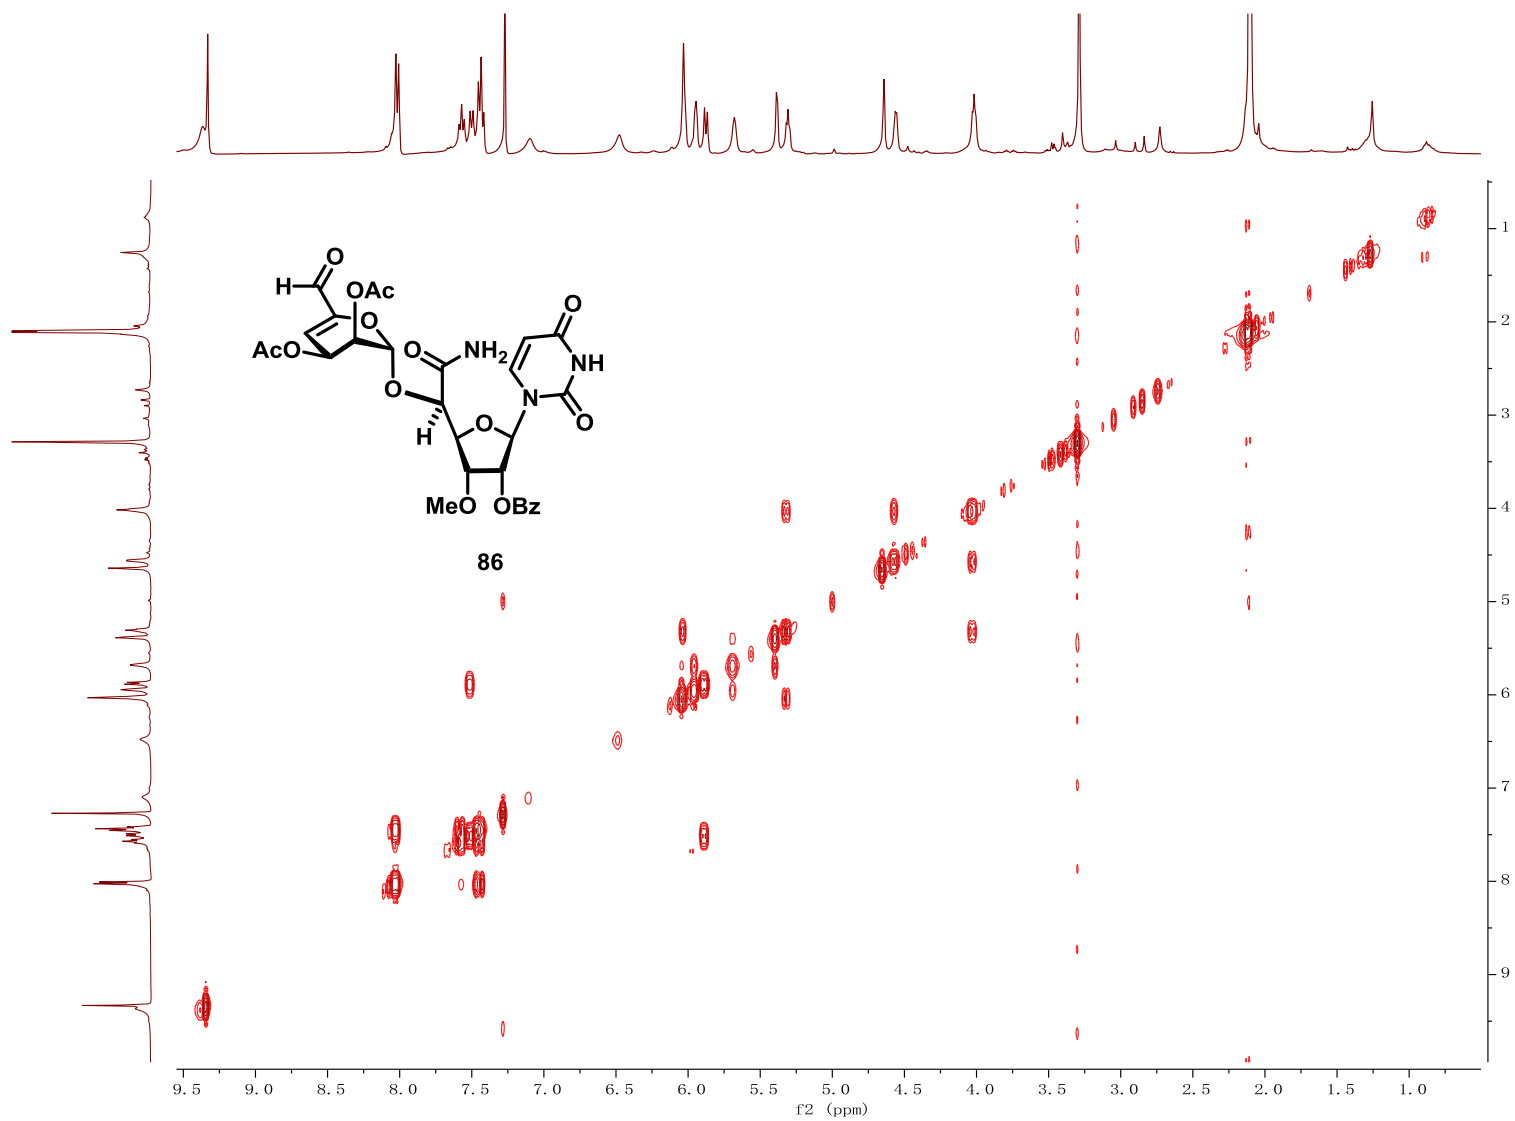

S221

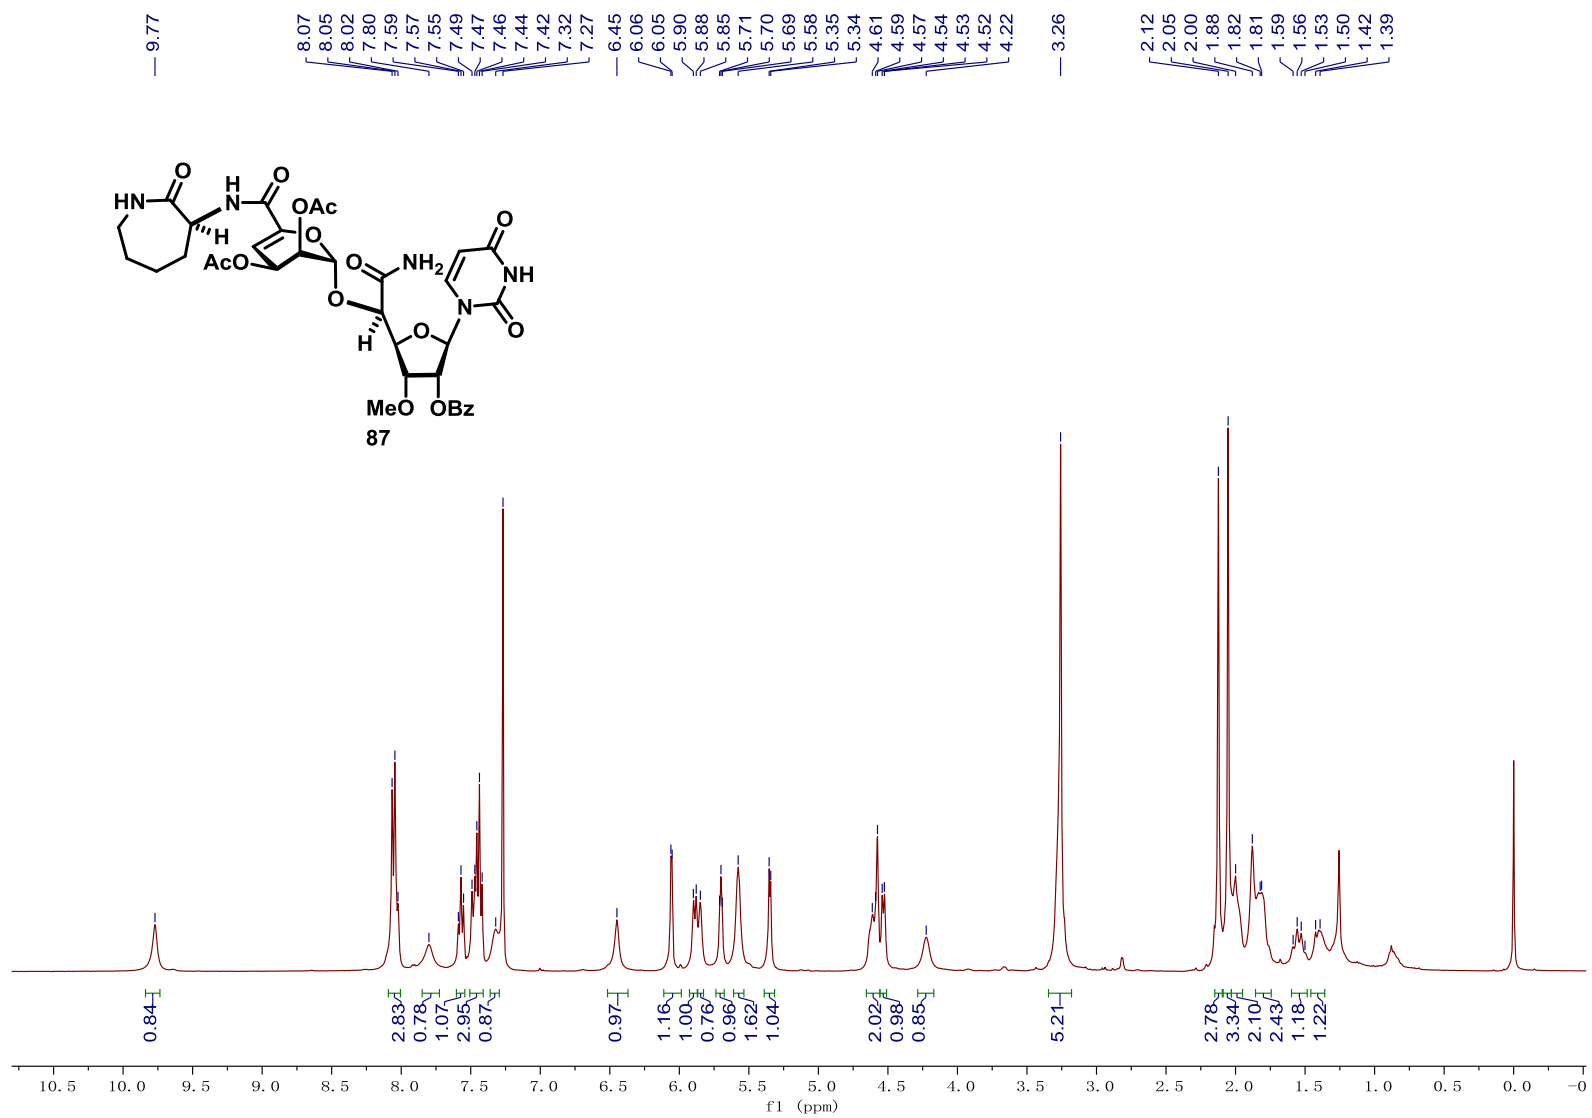

S222

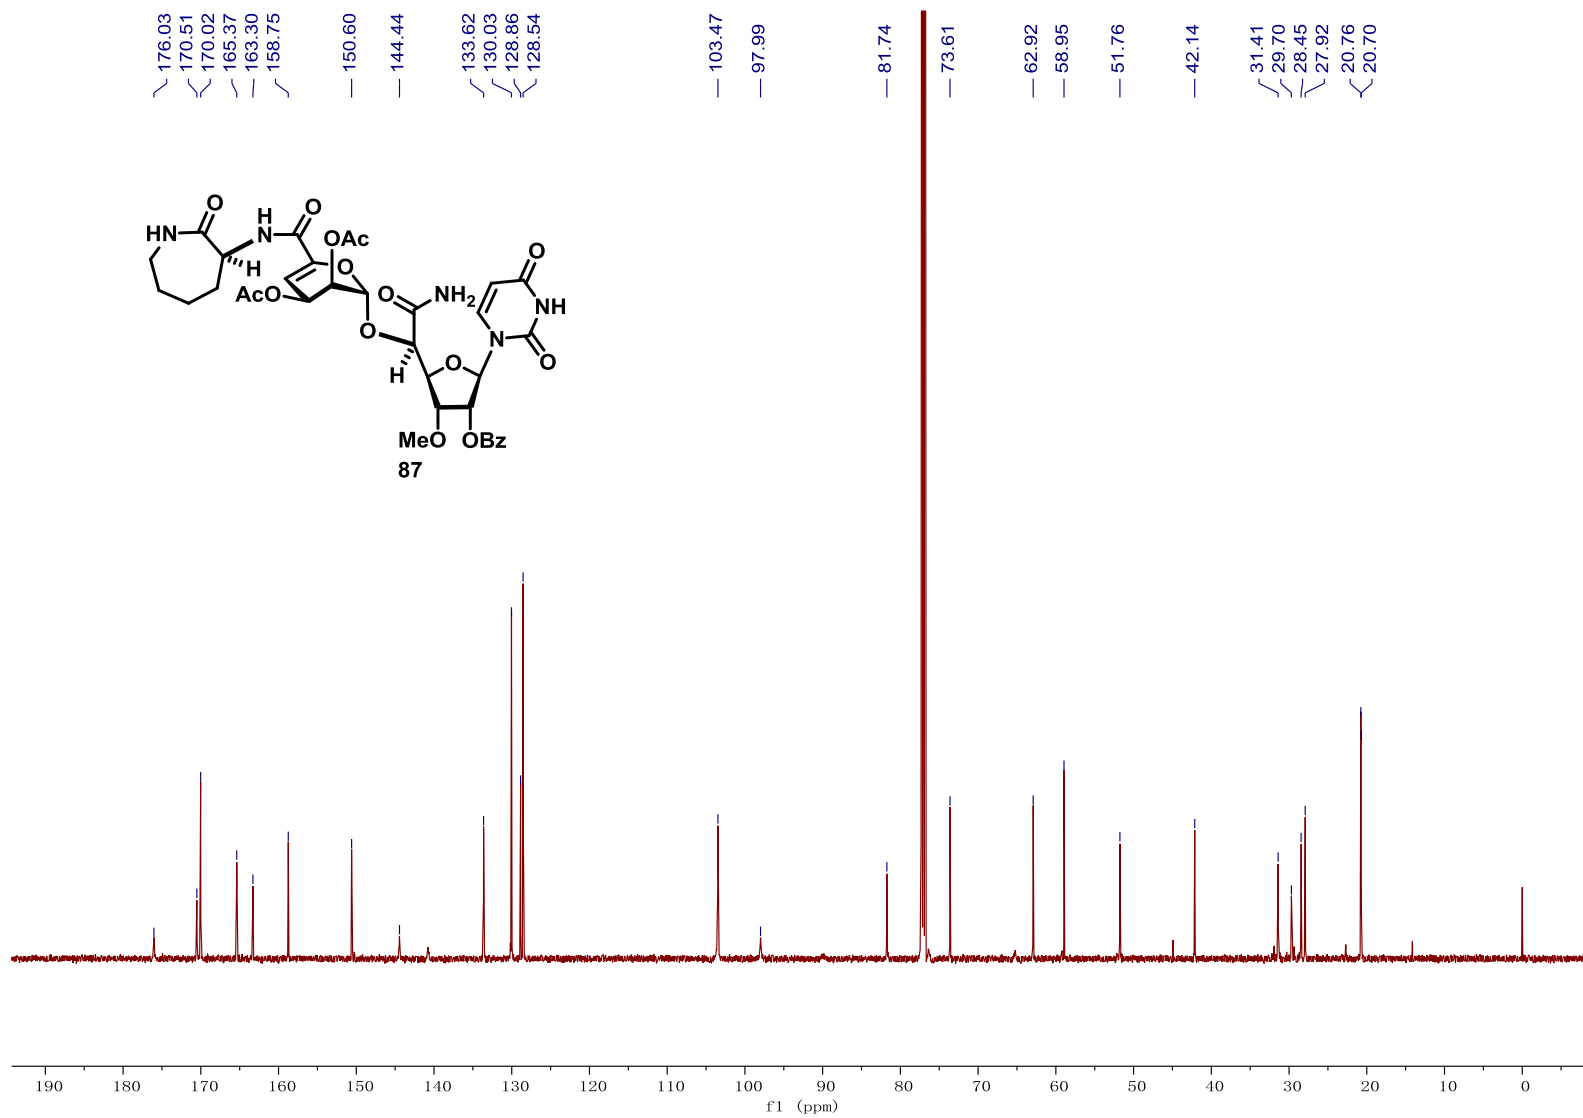

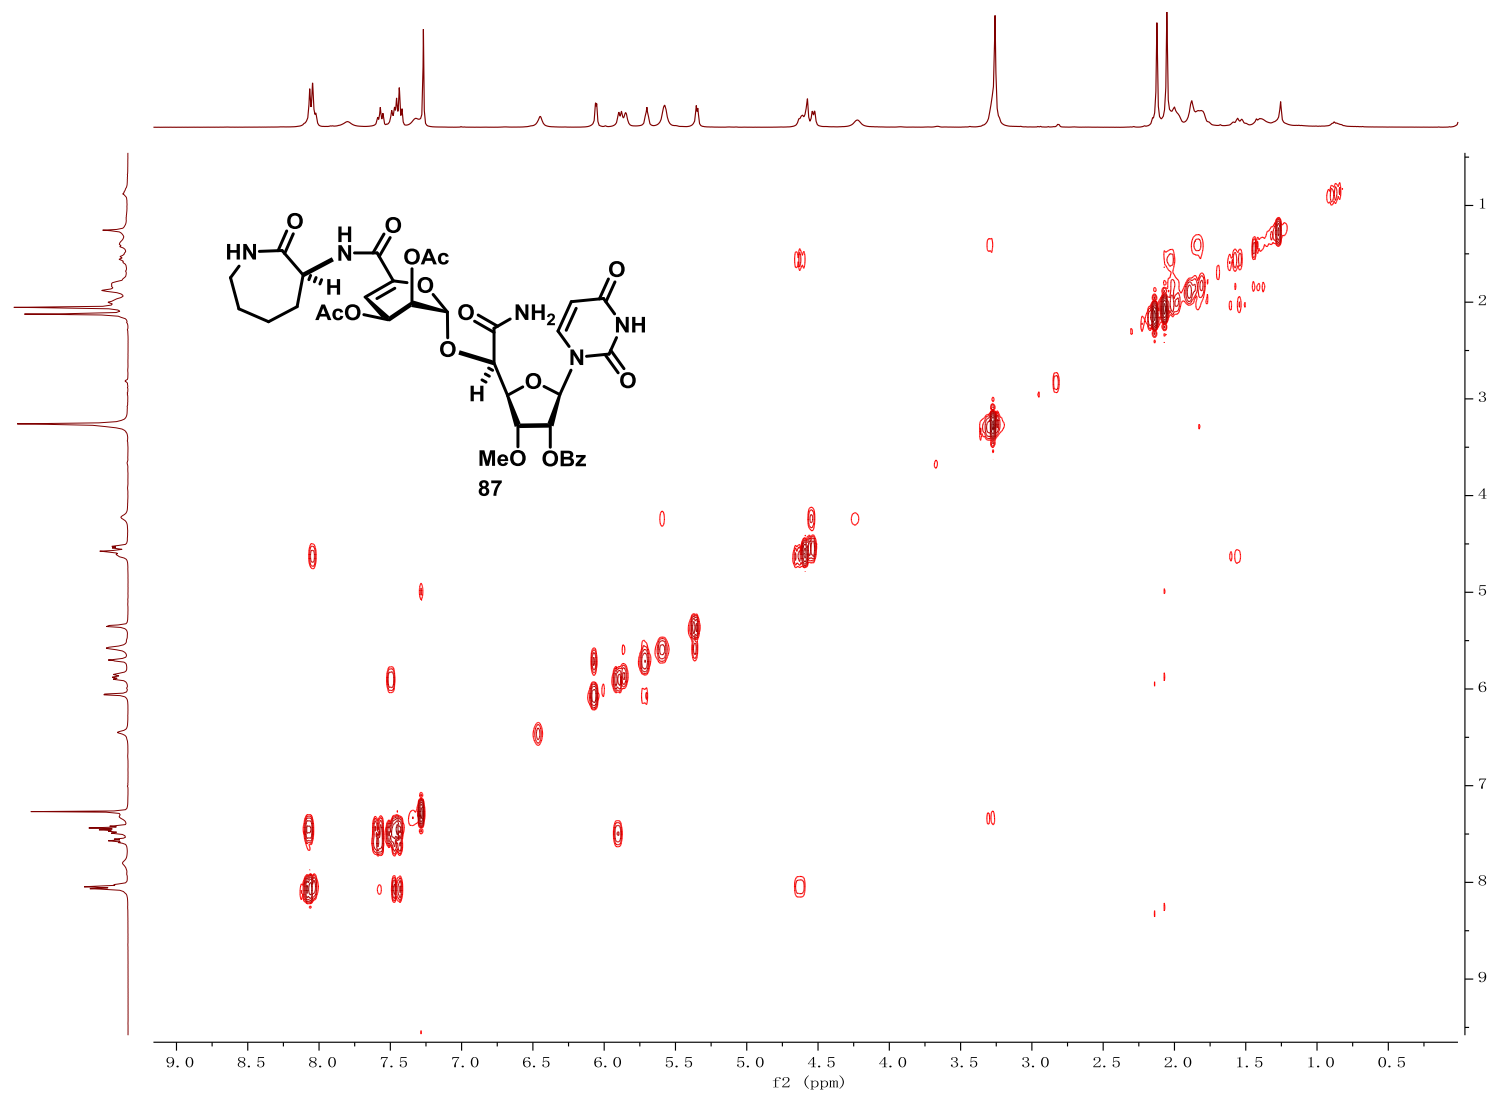

S224

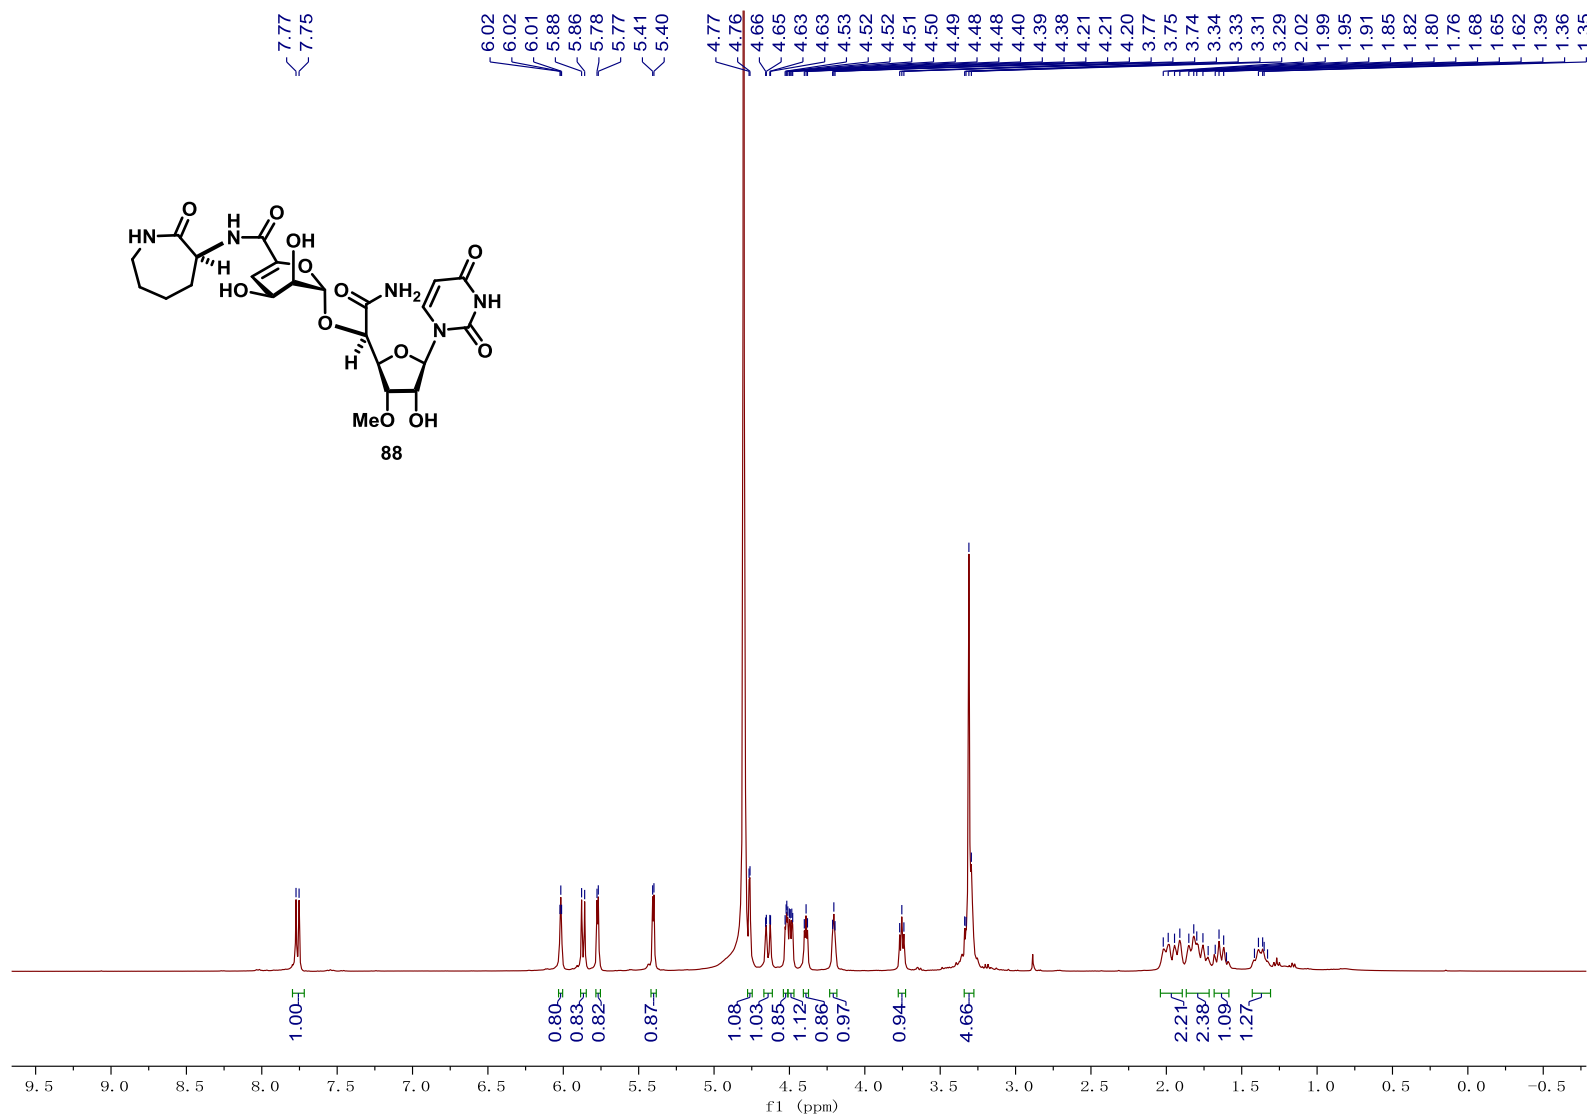

S225

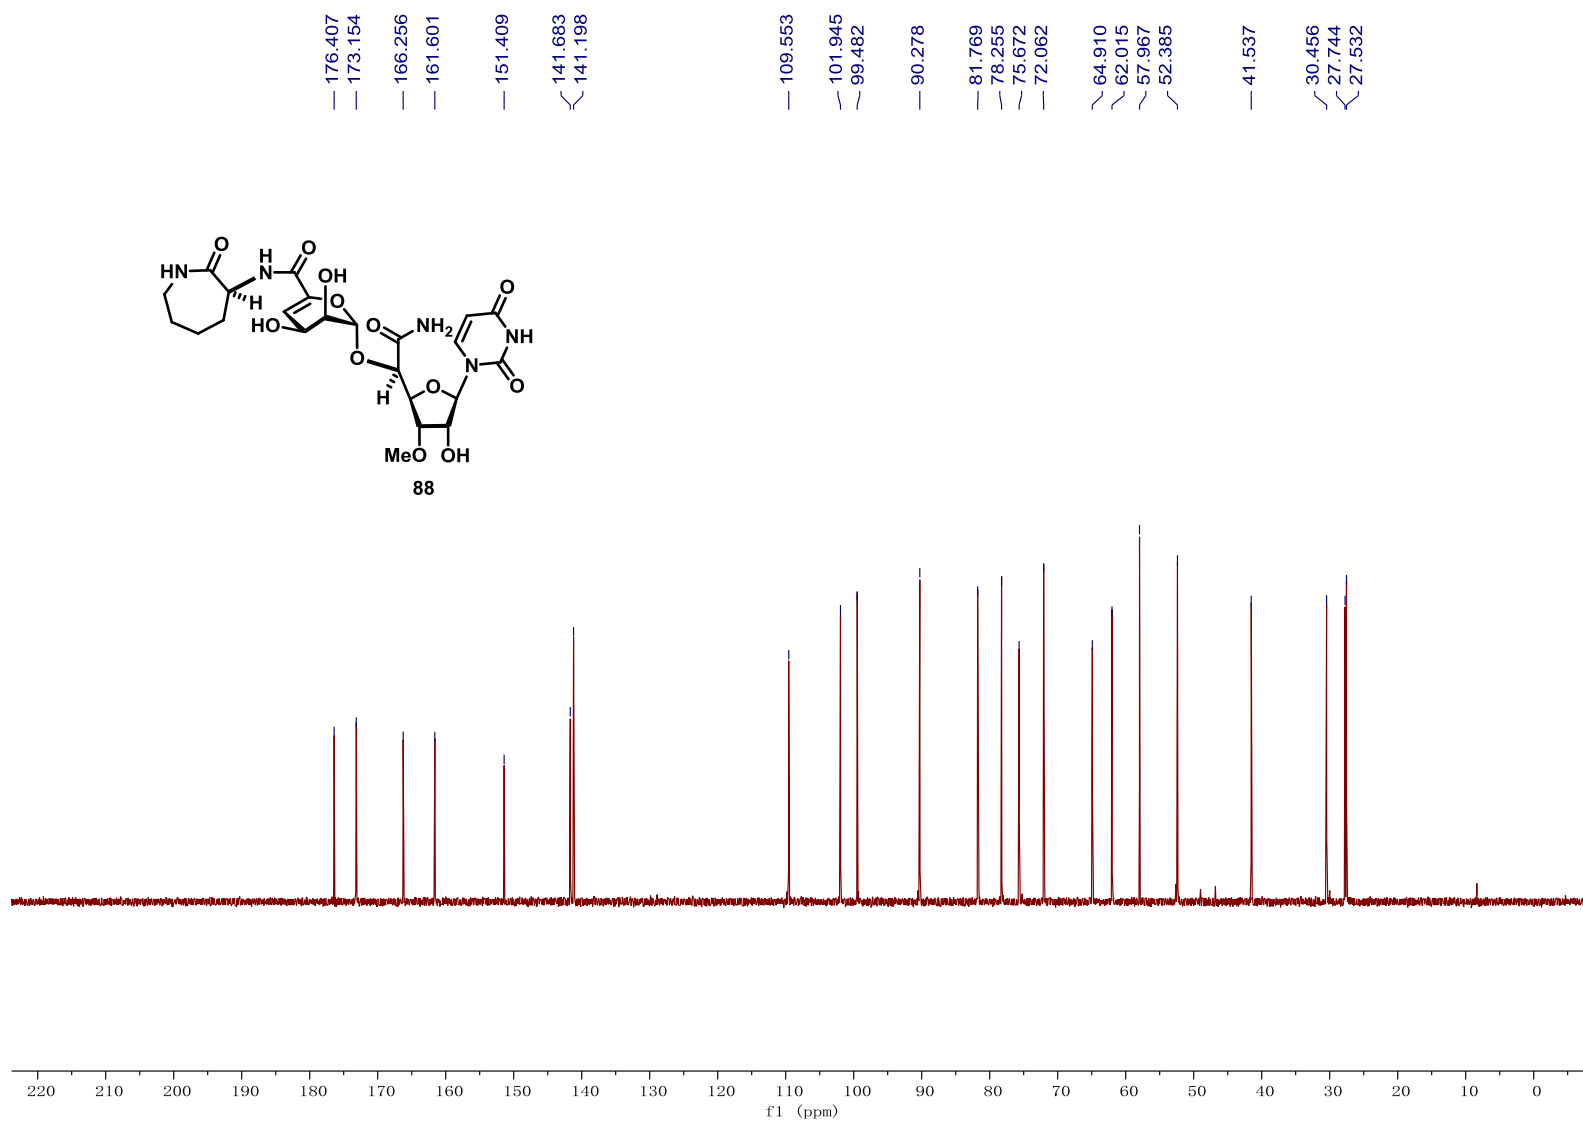

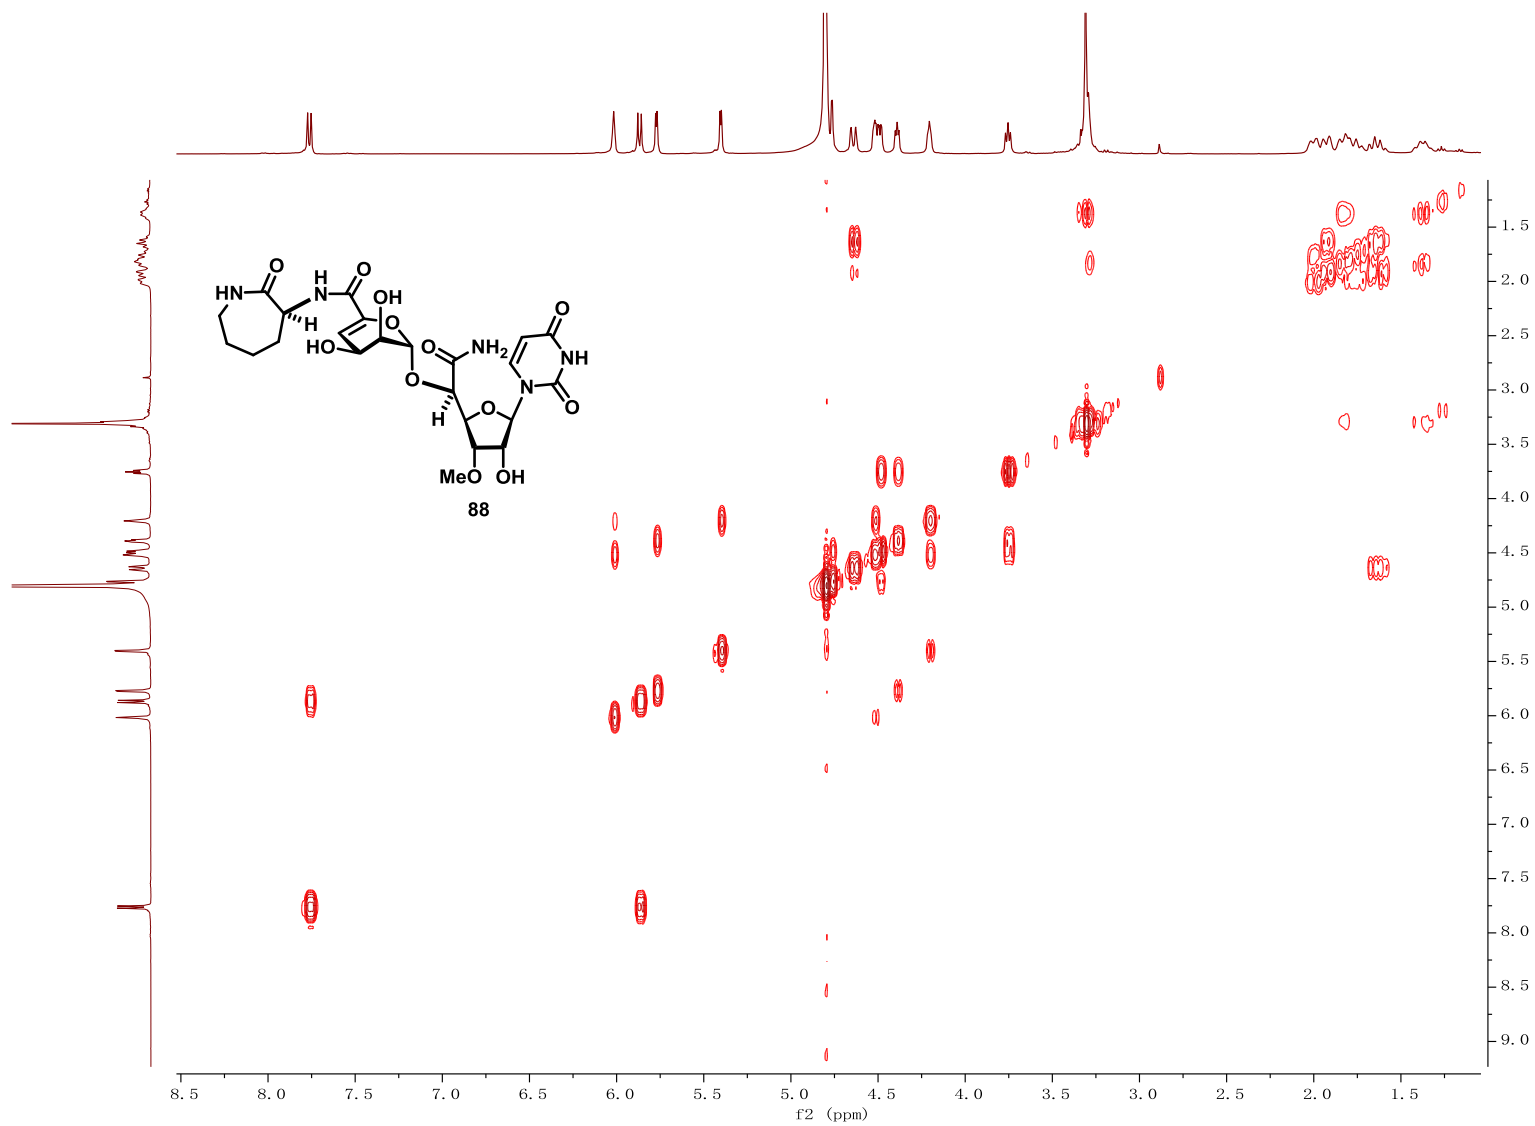

S227
